# Supplementary material
Source: Research Square preprint supplement (doi:10.21203/rs.3.rs-9572543/v1)
Supplement: Supplementary file 1 [file 70a959e1ed440ea94f08ab2b.docx]

**Table S2. Clinical characteristics of the eight cases used for nCounte and spatial transcriptome analysis**

|  | Responder(pCRa) | | | |  | Non-responder | | | |
| --- | --- | --- | --- | --- | --- | --- | --- | --- | --- |
| Patient ID | Y1 | Y2 | Y3 | Y4 |  | Y5 | Y6 | Y7 | Y8 |
| Age | 46 | 47 | 57 | 48 |  | 37 | 65 | 61 | 31 |
| Menopausal status | pre | pre | post | pre |  | pre | post | post | pre |
| *BRCA1/2* status | unknown | unknown | wild | unknown |  | wild | wild | unknown | unknown |
| Tumour size, 　(mm) | 18 | 36 | 32 | 28 |  | 51 | 25 | 28 | 65 |
| Nodal status | negative | negative | positive | positive |  | positive | negative | negative | positive |
| Clinical stageb | I | IIA | IIB | IIB |  | IIIA | IIA | IIA | IIIA |
| HER2 score (IHC) | 0 | 0 | 1 | 0 |  | 1 | 2 | 0 | 0 |
| Ki-67 (%) | 30 | 50 | 50 | unknown |  | 80 | 30 | 40 | 80 |
| TILs (%) | 10 | 70 | 50 | 50 |  | 80 | 20 | 30 | 20 |
| Chemotherapy regimen | ddEC→PTX | ddEC→PTX | ddEC→DTX | ddEC→PTX |  | ddEC→PTX | ddEC→PTX | ddEC→PTX | ddEC→DTX |

*pCR* pathological complete response, *BRCA* Breast Cancer Susceptibility Gene, *HER2* human EGF recpter2, *TILs* tumour infiltrating lymphocytes, *ddEC* dose-dense epirubicin/cyclophosphamide, *PTX* paclitaxel, *DTX* docetaxel,

a pCR was defined as ypT0/is ypN0

b Clinical stage was determined according to the General Rules for Clinical and Pathological Recording of Breast Cancer, 19th edition (Japanese Breast Cancer Society)
