# Supplementary material
Source: Research Square preprint supplement (doi:10.21203/rs.3.rs-9572543/v1)
Supplement: Supplementary file 1 [file 0615ed9d2ed94c98117f94c7.xlsx]

## Sheet: Table S2
gene	cell_type
ABCC11	Breast cancer
ACTA2	Smooth muscle cells
ACTG2	Breast myoepithelial cells
ADAM9	Breast glandular cells
ADGRE5	Dendritic cells
ADH1B	Adipocytes
ADIPOQ	Adipocytes
AGR3	Breast glandular cells
AIF1	Macrophages
AKR1C1	Smooth muscle cells
AKR1C3	Endothelial cells
ALDH1A3	Breast glandular cells
ANGPT2	Endothelial cells
ANKRD28	B cells
ANKRD29	Adipocytes
ANKRD30A	Epithelial cells
APOBEC3A	B cells
APOBEC3B	Breast cancer
APOC1	Macrophages
AQP1	Endothelial cells
AQP3	Breast glandular cells
AR	Breast cancer
AVPR1A	Smooth muscle cells
BACE2	Breast glandular cells
BANK1	B cells
BASP1	Macrophages
C15orf48	Breast glandular cells
C1QA	Macrophages
C1QC	Macrophages
C2orf42	B cells
C5orf46	Breast glandular cells
C6orf132	Breast myoepithelial cells
CAV1	Breast cancer
CAVIN2	Adipocytes
CCDC6	Breast glandular cells
CCDC80	Fibroblasts
CCL5	T cells
CCL8	Smooth muscle cells
CCND1	Breast cancer
CCPG1	B cells
CCR7	T cells
CD14	Monocytes
CD163	Macrophages
CD19	B cells
CD247	NK cells
CD27	B cells
CD274	T cells
CD3E	T cells
CD3G	T cells
CD4	T cells
CD68	Macrophages
CD69	T cells
CD79A	B cells
CD79B	B cells
CD80	Macrophages
CD83	Dendritic cells
CD86	Macrophages
CD8A	T cells
CD9	Breast glandular cells
CD93	Endothelial cells
CDC42EP1	Breast glandular cells
CDH1	Breast cancer
CEACAM6	Breast cancer
CEACAM8	Neutrophils
CENPF	Breast cancer
CLEC14A	Adipocytes
CLEC9A	Dendritic cells
CLECL1	B cells
CLIC6	Breast glandular cells
CPA3	Mast cells
CRISPLD2	Smooth muscle cells
CTH	Smooth muscle cells
CTLA4	T cells
CTSG	Mast cells
CTTN	Breast glandular cells
CX3CR1	Macrophages
CXCL12	Breast cancer
CXCL16	Macrophages
CXCL5	Macrophages
CXCR4	T cells
CYTIP	T cells
DAPK3	Breast glandular cells
DMKN	Breast glandular cells
DNAAF1	B cells
DNTTIP1	Breast glandular cells
DPT	Fibroblasts
DSC2	Breast glandular cells
DSP	Breast myoepithelial cells
DST	Breast myoepithelial cells
DUSP2	T cells
DUSP5	B cells
EGFL7	Adipocytes
EGFR	Breast cancer
EIF4EBP1	Breast glandular cells
ENAH	Breast glandular cells
EPCAM	Epithelial cells
ERBB2	Breast cancer
ERN1	B cells
ESM1	Endothelial cells
ESR1	Breast cancer
FAM107B	B cells
FAM49A	Macrophages
FASN	Breast glandular cells
FBLN1	Fibroblasts
FCER1A	Dendritic cells
FCER1G	NK cells
FCGR3A	Monocytes
FGL2	Macrophages
FLNB	Breast glandular cells
FOXA1	Breast cancer
FOXC2	Smooth muscle cells
FOXP3	T cells
FSTL3	Smooth muscle cells
GATA3	Breast cancer
GJB2	Macrophages
GLIPR1	Breast myoepithelial cells
GNLY	NK cells
GPR183	T cells
GZMA	T cells
GZMK	T cells
HAVCR2	T cells
HMGA1	Breast glandular cells
HOOK2	Breast glandular cells
HOXD8	Adipocytes
HOXD9	Adipocytes
HPX	Breast glandular cells
IGF1	Fibroblasts
IGSF6	Macrophages
IL2RA	T cells
IL2RG	Dendritic cells
IL3RA	Dendritic cells
IL7R	T cells
ITGAM	Myeloid cells
ITGAX	Dendritic cells
ITM2C	B cells
JUP	Breast glandular cells
KARS	Breast myoepithelial cells
KDR	Adipocytes
KIT	Breast cancer
KLF5	Breast myoepithelial cells
KLRB1	T cells
KLRC1	T cells
KLRD1	NK cells
KLRF1	NK cells
KRT14	Epithelial cells
KRT23	Breast glandular cells
KRT5	Breast myoepithelial cells
KRT6B	Breast myoepithelial cells
KRT7	Breast cancer
KRT8	Epithelial cells
LAG3	T cells
LARS	Smooth muscle cells
LDHB	Breast cancer
LGALSL	B cells
LILRA4	Dendritic cells
LPL	Adipocytes
LPXN	Macrophages
LRRC15	Breast cancer
LTB	T cells
LUM	Fibroblasts
LY86	Macrophages
LYPD3	Breast glandular cells
LYZ	Macrophages
MAP3K8	Macrophages
MDM2	Breast cancer
MKI67	Breast cancer
MLPH	Breast glandular cells
MMP1	Fibroblasts
MMP12	Fibroblasts
MMP2	Fibroblasts
MMRN2	Adipocytes
MNDA	Macrophages
MRC1	Macrophages
MS4A1	B cells
MUC6	Epithelial cells
MYBPC1	Epithelial cells
MYH11	Smooth muscle cells
MYLK	Breast myoepithelial cells
MYO5B	Breast glandular cells
MZB1	B cells
NARS	Breast myoepithelial cells
NCAM1	NK cells
NDUFA4L2	Adipocytes
NKG7	NK cells
NOSTRIN	Adipocytes
OCIAD2	Breast glandular cells
OPRPN	Breast glandular cells
OXTR	Breast myoepithelial cells
PCLAF	Breast cancer
PDCD1	T cells
PDCD1LG2	Adipocytes
PDE4A	Adipocytes
PDGFRA	Fibroblasts
PDGFRB	Smooth muscle cells
PDK4	Smooth muscle cells
PECAM1	Endothelial cells
PELI1	B cells
PGR	Breast cancer
PIGR	Breast glandular cells
PIM1	Fibroblasts
PLD4	Macrophages
POSTN	Fibroblasts
PPARG	Macrophages
PRDM1	T cells
PRF1	NK cells
PTGDS	Breast cancer
PTN	Breast myoepithelial cells
PTPRC	Immune cells
PTRHD1	Breast glandular cells
QARS	Breast glandular cells
RAB30	B cells
RAMP2	Adipocytes
RAPGEF3	Adipocytes
RHOH	T cells
RORC	T cells
RTKN2	T cells
RUNX1	Breast cancer
S100A14	Breast glandular cells
S100A4	Breast cancer
S100A8	Monocytes
SCD	Breast cancer
SCGB2A1	Breast glandular cells
SDC4	Breast glandular cells
SEC11C	B cells
SEC24A	Macrophages
SELL	T cells
SERHL2	Breast glandular cells
SERPINA3	Breast glandular cells
SERPINB9	Macrophages
SFRP1	Breast cancer
SFRP4	Fibroblasts
SH3YL1	Breast glandular cells
SLAMF1	B cells
SLAMF7	B cells
SLC25A37	Breast glandular cells
SLC5A6	Breast glandular cells
SMAP2	T cells
SMS	Breast glandular cells
SNAI1	Breast cancer
SOX17	Endothelial cells
SOX18	Adipocytes
SPIB	Dendritic cells
SQLE	Breast glandular cells
SRPK1	Breast glandular cells
SSTR2	Smooth muscle cells
STC1	Endothelial cells
SVIL	Breast glandular cells
TAC1	Fibroblasts
TACSTD2	Breast cancer
TCEAL7	Fibroblasts
TCF4	Breast cancer
TCF7	T cells
TCIM	Breast glandular cells
TCL1A	B cells
TENT5C	T cells
TFAP2A	Adipocytes
THAP2	Smooth muscle cells
TIFA	Endothelial cells
TIGIT	T cells
TIMP4	Adipocytes
TMEM147	Breast glandular cells
TNFRSF17	Plasma cells
TOMM7	Breast glandular cells
TOP2A	Breast cancer
TPD52	Breast glandular cells
TPSAB1	Mast cells
TRAC	T cells
TRAF4	Breast myoepithelial cells
TRAPPC3	Breast glandular cells
TRIB1	B cells
TUBA4A	T cells
TUBB2B	Breast myoepithelial cells
UCP1	Adipocytes
USP53	Breast glandular cells
VOPP1	B cells
VWF	Endothelial cells
WARS	Endothelial cells
ZEB1	Breast cancer
ZEB2	Breast cancer
ZNF562	Breast glandular cells
ADAM12	Fibroblasts
ATM	T cells
AURKA	T cells
AURKB	Breast glandular cells
B2M	T cells
BCL2	Breast glandular cells
BMP7	Fibroblasts
CCNA1	Fibroblasts
CCNA2	Breast glandular cells
CCNB1	T cells
CCNE1	Macrophages
CCR2	T cells
CD24	Breast glandular cells
CD47	Fibroblasts
CDC14A	T cells
CDC14B	Fibroblasts
CDC20	T cells
CDC25B	Breast glandular cells
CDKN1A	Breast glandular cells
COL6A3	Fibroblasts
CREBBP	T cells
CXCL9	Fibroblasts
CXCR6	T cells
DCLK1	Fibroblasts
E2F3	Breast glandular cells
EEF2K	Breast glandular cells
FAP	Fibroblasts
FOXC1	Breast glandular cells
GFPT2	Fibroblasts
GZMB	T cells
HIF1A	T cells
HK3	Macrophages
IDO1	Macrophages
IFNG	T cells
IL6	T cells
LRG1	Breast glandular cells
MAPK1	T cells
MASTL	T cells
NFKBIA	T cells
PKM	T cells
PTEN	Smooth muscle cells
RB1	Macrophages
SLPI	Breast glandular cells
STAT3	Breast glandular cells
STXBP4	Fibroblasts
TGFB1	T cells
TMEM173	T cells
TNF	Macrophages
VEGFA	Breast glandular cells
WEE1	Breast glandular cells
