# Supplementary material
Source: Research Square preprint supplement (doi:10.21203/rs.3.rs-9572543/v1)
Supplement: Supplementary file 2 [file 9df36a00adecd5b049b87614.docx]

**Table S1** Patient characteristics

|  | Value | |
| --- | --- | --- |
| Age, median range (years) | 50 | (26-73) |
| Menopausal status, n (%) |  |  |
| Premenopausal | 27 | (55.1) |
| postmenopausal | 22 | (44.9) |
| *BRCA1* status, n (%) |  |  |
| Wild | 20 | (40.8) |
| Pathogenic | 3 | ( 6.1) |
| VUS | 0 | ( 0.0) |
| Unknown | 26 | (53.1) |
| *BRCA2* status, n (%) |  |  |
| Wild | 19 | (38.7) |
| Pathogenic | 2 | ( 4.1) |
| VUS | 2 | ( 4.1) |
| Unknown | 26 | (53.1) |
| Tomor size, n (%) |  |  |
| T1 | 15 | (30.6) |
| T2 | 26 | (53.1) |
| T3 | 5 | (10.2) |
| T4 | 3 | ( 6.1) |
| Nodal Status, n (%) |  |  |
| N0 | 32 | (65.3) |
| N1 | 14 | (28.6) |
| N2 | 1 | ( 2.0) |
| N3 | 2 | ( 4.1) |
| Clinical stage, n (%) |  |  |
| I | 13 | (26.5) |
| IIA | 16 | (32.7) |
| IIB | 11 | (22.4) |
| III | 9 | (18.4) |
| Chemotherapy regimen, n (%) |  |  |
| ddEC/EC→DTX/PTX | 47 | (95.9) |
| PTX→ddEC/EC | 2 | ( 4.1) |
| TIL, n (%) |  |  |
| ≤20 | 15 | (30.6) |
| >20, <70 | 11 | (22.4) |
| ≥70 | 5 | (10.2) |
| Unknown | 18 | (36.8) |
| Ki-67, n (%) |  |  |
| <20% | 3 | ( 6.1) |
| ≥20%, <50% | 10 | (20.4) |
| ≥50% | 20 | (40.8) |
| Unknown | 16 | (32.7) |
| HER2, n (%) |  |  |
| 0 | 22 | (44.9) |
| 1+ | 21 | (42.9) |
| 2+ | 6 | (12.2) |

*BRCA* Breast Cancer Susceptibility Gene, *VUS* variant of unknown significance, *ddEC* dose-dense epirubicin/cyclophosphamide, *EC* epirubicin/cyclophosphamide, *DTX* docetaxel, *PTX* paclitaxel, *TIL* tumor infiltrating lymphocytes, *HER2* human EGF recpter2
