# Supplementary material
Source: Research Square preprint supplement (doi:10.21203/rs.3.rs-9572543/v1)
Supplement: Supplementary file 2 [file 162fc71dcecf453508683272.xlsx]

## Sheet: Table S5
	Term	es	nes	pval	sidak	fdr	geneset_size	leading_edge
0	HALLMARK_E2F_TARGETS	0.542322	8.12666	4.4128e-16	2.2064e-14	2.2064e-14	187	CSE1L,KIF4A,SPAG5,SYNCRIP,ANP32E,CDC20,BRCA1,PAICS,AURKB,DIAPH3,BARD1,SSRP1,MELK,CDKN1B,ING3,MCM6,PA2G4,BRCA2,RAD50,GINS1,CBX5,ATAD2,TMPO,CIT,RACGAP1,MLH1,NBN,SMC3,UNG,IPO7,GSPT1,CENPE,NUP107,EIF2S1,MYC,NUP153,CHEK2,PRKDC,PRIM2,DLGAP5,STAG1,DCTPP1,PPP1R8,CCNB2,CHEK1,GINS4,KIF18B,TFRC,AK2,CTCF,NCAPD2,DNMT1,CDKN2A,STMN1,BRMS1L,EZH2,DSCC1,AURKA,HMGB3,PTTG1,MCM7,DEK,HMGA1,HUS1,MAD2L1,CDCA8,LMNB1,DEPD…
1	HALLMARK_MYC_TARGETS_V1	0.521351	7.75898	8.56135e-15	4.28068e-13	2.14034e-13	188	SMARCC1,ETF1,TCP1,SYNCRIP,TYMS,CLNS1A,GNL3,HNRNPA2B1,RPL14,PSMB3,RRM1,TXNL4A,MCM6,PA2G4,POLE3,PGK1,NCBP2,ACP1,PSMA2,CCT3,RPL22,HDGF,HSPD1,PSMA1,GSPT1,SRPK1,RPS3,UBE2E1,EIF2S1,MYC,IFRD1,ABCE1,CANX,RPS2,FAM120A,XPOT,EIF2S2,VDAC3,EIF4A1,EIF3B,KPNB1,RAD23B,CCT7,TFDP1,NHP2,TARDBP,RPS10,RPL6,PSMD8,AIMP2,SNRPD1,CUL1,HNRNPA1,NCBP1,MCM7,UBA2,DEK,HDAC2,YWHAE,SSBP1,CDC45,SET,MAD2L1,SF3B3,VDAC1,DHX15,MCM4,HD…
2	HALLMARK_INTERFERON_GAMMA_RESPONSE	0.499922	7.59902	2.9838e-14	1.4919e-12	4.973e-13	196	ZBP1,IRF4,IL15,CXCL10,PNPT1,IFI44L,PLSCR1,GZMA,IFIT2,IDO1,OASL,SOD2,B2M,ISOC1,CXCL9,TAP1,CCL7,RSAD2,SAMD9L,TDRD7,CFB,NAMPT,PSMB8,RTP4,PFKP,HLA-DQA1,CCL5,FAS,IL7,IL6,PTPN2,HLA-B,NUP93,TRIM25,CD69,MX1,CIITA,PELI1,BATF2,HERC6,APOL6,PSMA2,TRIM14,C1S,GBP4,ICAM1,TNFSF10,PDE4B,IRF1,NLRC5,MTHFD2,TNFAIP3,LAP3,IFIT3,PSMB2,STAT3,GBP6,CD274,PSMB9,CXCL11,RAPGEF6,TNFAIP2,IFIH1,DDX60,ADAR,DDX58,CASP1,HLA-G,OAS2…
3	HALLMARK_G2M_CHECKPOINT	0.514018	7.46935	8.05928e-14	4.02964e-12	1.00741e-12	183	SMARCC1,KIF4A,RASAL2,TPX2,SYNCRIP,BUB1,E2F3,CDC20,AURKB,BARD1,E2F2,DBF4,CDKN1B,PRC1,CASP8AP2,NEK2,CUL4A,BRCA2,E2F4,TMPO,SMC2,RACGAP1,FBXO5,STIL,MEIS2,GSPT1,CENPE,FANCC,CENPF,MYC,EXO1,KIF15,TTK,NDC80,PRIM2,SLC38A1,STAG1,CCNB2,AMD1,CHEK1,DMD,SLC7A1,RBL1,EFNA5,CTCF,RAD23B,TFDP1,EZH2,FOXN3,AURKA,SNRPD1,PTTG1,SLC7A5,HMGA1,HUS1,CDC45,MAD2L1,LMNB1,CKS1B,POLQ,ESPL1,MYBL2,SMC1A,PLK1,PLK4,LBR,HMMR,HSPA8,CD…
4	HALLMARK_EPITHELIAL_MESENCHYMAL_TRANSITION	-0.423615	-5.69949	1.20164e-08	6.00818e-07	1.03839e-07	191	SLIT3,MATN2,IGFBP2,SCG2,LRP1,SPARC,ACTA2,ADAM12,COL1A2,EDIL3,CDH11,COL3A1,VEGFC,COL12A1,COL5A1,MMP3,HTRA1,FBN1,ITGB1,COL5A2,MEST,POSTN,TNC,FBLN1,FSTL3,FMOD,BMP1,MSX1,TPM2,MMP14,RHOB,SERPINH1,APLP1,TGFB1,COL11A1,TAGLN,MATN3,ELN,BASP1,MMP2,COL4A1,COL1A1,LOXL1,SNAI2,PPIB,ITGA5,THY1,RGS4,COMP,FUCA1,OXTR,FAP,COL7A1,PCOLCE,SFRP4,MAGEE1,ECM1,IGFBP4,JUN,TIMP1,CXCL12,COL6A3,SERPINE1,BGN,TIMP3,GADD45A,NID2…
5	HALLMARK_MITOTIC_SPINDLE	0.41049	5.6933	1.24607e-08	6.23034e-07	1.03839e-07	196	KIF4A,KIFAP3,RASAL2,TPX2,BUB1,RHOF,SYNPO,SORBS2,PRC1,NEK2,BRCA2,SASS6,DLG1,ECT2,LATS1,RACGAP1,FBXO5,CDC42BPA,CENPE,RICTOR,CENPF,FGD4,FARP1,KIF15,TTK,TUBGCP3,NDC80,DLGAP5,ANLN,CCNB2,CCDC88A,ARHGAP10,PCNT,TRIO,STK38L,KIF1B,DST,KNTC1,RALBP1,FLNB,AURKA,SPTAN1,GEMIN4,NCK1,PDLIM5,RASA2,WASF1,LMNB1,ESPL1,SMC1A,RABGAP1,TIAM1,PLK1,CDK5RAP2,CDK1,LRPPRC,KIF2C,APC,KIF23,NUSAP1,EPB41L2,WASF2,KIF3C,SOS1,CEP192…
6	HALLMARK_ALLOGRAFT_REJECTION	0.426073	5.62674	1.83647e-08	9.18237e-07	1.31177e-07	180	IRF4,IL15,IL27RA,TRAT1,HLA-DOA,TNF,GZMA,B2M,RPS3A,CXCL9,ZAP70,TLR6,CXCL13,CCL7,IL12A,BRCA1,TAP1,CD2,CXCR3,CCL22,NCK1,EIF3J,TLR2,ABCE1,EGFR,HLA-DQA1,CCL5,FAS,IL7,PTPRC,CD96,IL6,CD8A,CCR5,LCK,CCL19,IFNG,CCL13,GZMB,CD3G,CD3D,CD3E,NPM1,CD8B,ICAM1,HLA-G,CD40LG,HDAC9,MTIF2,IL1B,TAP2,IL2RG,CD247,FASLG,CCL4,ITK,LY75,CD80,TLR1
7	HALLMARK_MTORC1_SIGNALING	0.406889	5.50148	3.76619e-08	1.88309e-06	2.33717e-07	192	ETF1,SORD,AURKA,HSPA9,NUP205,CCNG1,BUB1,SLC7A5,ASNS,DAPP1,HSPA4,PLOD2,STIP1,SLC2A1,NAMPT,HK2,HMGCS1,CANX,PRDX1,GTF2H1,GPI,ACLY,CCT6A,HMGCR,PSMG1,SCD,SLC7A11,NFIL3,MCM2,RPA1,INSIG1,EIF2S2,EEF1E1,GMPS,POLR3G,PIK3R3,MCM4,PDK1,ENO1,PGK1,P4HA1,LDHA,PNO1,STARD4,ME1,GOT1,DHCR7,PSME3,IDI1,UCHL5,MTHFD2,LDLR,ACACA,TFRC,PLK1,IMMT,ALDOA,FADS1,TXNRD1,DDIT4,HSPD1,GAPDH,FADS2,ABCF2,CDC25A,PPIA,PSAT1
8	HALLMARK_TNFA_SIGNALING_VIA_NFKB	0.404821	5.48194	4.20691e-08	2.10345e-06	2.33717e-07	193	TNF,CXCL10,BCL2A1,SERPINB2,IFIT2,SOD2,FOS,MYC,TAP1,FOSB,TNFRSF9,BIRC3,REL,PLK2,TLR2,NFAT5,NAMPT,CD80,KLF10,NR4A1,CCL5,PDLIM5,ATF3,PFKFB3,BIRC2,IL6,FJX1,AREG,NFIL3,CD69,EGR1,SIK1,IL7R,PTX3,KYNU,RCAN1,ICAM1,PDE4B,IRF1,LDLR,JAG1,TNFAIP3,KLF6,SERPINB8,RNF19B,IL1B,CXCL11,CXCL1,TNFAIP2,IFIH1,EDN1,CXCL2,DDX58,CCL4,KLF4,CCL20
9	HALLMARK_MYC_TARGETS_V2	0.639087	5.34214	9.18573e-08	4.59285e-06	4.59287e-07	58	SUPV3L1,RRP12,SORD,AIMP2,TMEM97,WDR74,NDUFAF4,GNL3,RCL1,MYC,FARSA,HK2,WDR43,TCOF1,NOP16,PA2G4,PRMT3,TFB2M,MCM4,MYBBP1A,PPRC1,DCTPP1,UTP20,NIP7,SLC29A2,NPM1,DDX18,NOLC1,IPO4,TBRG4,RABEPK,PLK1,PLK4,NOP2,RRP9,MPHOSPH10,HSPD1,DUSP2,MAP3K6
10	HALLMARK_INTERFERON_ALPHA_RESPONSE	0.495526	5.14171	2.72242e-07	1.3612e-05	1.23747e-06	92	IL15,CXCL10,PNPT1,IFI44L,IFIT2,NCOA7,OASL,B2M,TAP1,RSAD2,SAMD9L,TDRD7,RTP4,IL7,CMPK2,TRIM25,MX1,BATF2,HERC6,TRIM14,C1S,GBP4,IRF1,LAP3,IFIT3,CXCL11,PSMB9,IFIH1,DDX60,ADAR,CASP1,PSMB8,LAMP3
11	HALLMARK_MYOGENESIS	-0.401068	-4.61755	3.88304e-06	0.000194134	1.61793e-05	161	ACTA1,MYOM2,SPEG,ITGB1,ATP6AP1,FKBP1B,KCNH2,GPX3,DMPK,BDKRB2,MB,TNNT1,PTP4A3,HSPB8,SMTN,SOD3,PDLIM7,CFD,CHRNB1,COL6A2,SPARC,CLU,LDB3,VIPR1,CASQ2,IGF1,ACTN2,SPHK1,MYH11,SGCD,SPDEF,GJA5,ADAM12,SYNGR2,BIN1,MAPK12,TPM2,CTF1,NCAM1,CHRNA1,ENO3,RB1,TGFB1,COX7A1,IGFBP7,FHL1,CRAT,TAGLN,APOD,COL3A1,CAMK2B,REEP1,RYR1,GNAO1,SORBS3,OCEL1,AEBP1,GAA,APLNR,MYOZ1,COL1A1,COL6A3,CACNA1H,CDH13,ACHE
12	HALLMARK_INFLAMMATORY_RESPONSE	0.375345	4.52316	6.09236e-06	0.000304572	2.34321e-05	180	IL15,CXCL10,CLEC5A,AHR,CXCL9,MYC,CCL7,CCL20,TNFRSF9,CCL22,TNFSF15,NAMPT,TLR2,CCL5,SGMS2,P2RX7,IL6,CCL17,NOD2,TLR3,HAS2,TACR1,LCK,CD69,IL7R,ADM,MXD1,MARCO,IL18R1,TNFSF10,CXCR6,ICAM1,PDE4B,GP1BA,IRF1,AQP9,OSMR,LDLR,KLF6,SLC7A1,KIF1B,IL1B,CXCL11,CCR7,PTGER2,EDN1,SLAMF1,SLC11A2,RTP4,RGS16,LAMP3,TLR1
13	HALLMARK_COAGULATION	-0.429126	-4.18712	2.82516e-05	0.0014116	0.000100898	104	ANG,ISCU,FBN1,APOC1,SERPINE1,MMP15,TIMP3,F2RL2,APOC2,RGN,PDGFB,CFI,PLAU,MASP2,PLAT,COMP,CAPN5,F3,PRSS23,MST1,CFD,F10,LRP1,SPARC,CLU,C1QA,BMP1,USP11,VWF,MMP10,MSRB2,CRIP2,MMP14,CSRP1,MMP11,DPP4,CTSH,PECAM1,SERPINA1,S100A13,TIMP1,DUSP6,MMP2,RAPGEF3,MMP3,CTSB,HTRA1,FN1
14	HALLMARK_KRAS_SIGNALING_DN	0.400181	3.82783	0.000129279	0.00644353	0.000430931	109	KLK8,SERPINB2,KRT5,CALML5,RSAD2,KLK7,CLDN8,BARD1,PKP1,NR6A1,PLAG1,CD207,BMPR1B,CCNA1,IFNG,MX1,STAG3,SLC6A14,CYP39A1,TFCP2L1,SPTBN2,SLC16A7,CD40LG,CAMK1D,TCF7L1,EDN1,TGM1,CCR8
15	HALLMARK_UNFOLDED_PROTEIN_RESPONSE	0.379528	3.47984	0.000501711	0.0247797	0.00156785	105	HSPA9,TTC37,SLC7A5,EXOSC9,ASNS,CHAC1,EIF2S1,EDC4,ATF6,DKC1,GEMIN4,NOP14,ATF3,STC2,XPOT,POP4,ERN1,CKS1B,CNOT6,DCP1A,EIF4G1,EIF4A2,SDAD1,SSR1,NPM1,DCP2,NOLC1,MTHFD2,CEBPG,KHSRP,RRP9,DDIT4,RPS14,EXOSC10,NHP2,EEF2,EXOSC2,PSAT1
16	HALLMARK_XENOBIOTIC_METABOLISM	-0.33182	-3.06697	0.00216242	0.102586	0.00636006	159	SLC46A3,CDA,FMO3,ITIH4,NDRG2,BCAR1,IL1R1,SERPINE1,GSTT2,PTS,DCXR,CROT,LCAT,BCAT1,BLVRB,CYP2E1,VNN1,GSS,MPP2,SLC12A4,ALDH2,FBLN1,F10,CYP2J2,CYP2S1,PEMT,DHRS7,EPHX1,IGF1,ABCC3,APOE,DDAH2,PTGDS,COMT,AKR1C3,RAP1GAP,XDH,ENPEP,MT2A,ALDH3A1,IGFBP4,HMOX1,PDK4,FBP1,ALDH9A1,PINK1,ELOVL5,ATOH8,SERTAD1,HES6,SLC6A6,GSTM4,TNFRSF1A
17	HALLMARK_KRAS_SIGNALING_UP	-0.324735	-3.04554	0.00232259	0.109761	0.00645165	175	BPGM,MYCN,SPARCL1,ALDH1A3,KIF5C,TSPAN7,TSPAN13,MMD,CROT,PLAU,ANO1,PLAT,FUCA1,PIGR,PLVAP,G0S2,TSPAN1,IGF2,MMP10,SNAP25,ITGBL1,FGF9,SPON1,ENG,SEMA3B,SCN1B,RELN,GNG11,PCSK1N,LAT2,CXCR4,LY96,SPRY2,EPHB2,MMP11,FLT4,VWA5A,ANKH,GADD45G,PECAM1,APOD,CBX8,CSF2RA,DUSP6,IL33,ACE,NAP1L2,ETV1,CPE,PCP4,DNMBP
18	HALLMARK_CHOLESTEROL_HOMEOSTASIS	0.396301	2.95083	0.00316919	0.146757	0.00833996	70	PLSCR1,MAL2,CBS,HMGCS1,LSS,SREBF2,ATF3,HMGCR,SCD,GNAI1,NFIL3,FABP5,FDPS,ALDOC,ACAT2,STARD4,DHCR7,GLDC,LDLR,IDI1,JAG1,FASN,FADS2
19	HALLMARK_ANDROGEN_RESPONSE	0.338639	2.68605	0.00723024	0.304292	0.0172904	93	SORD,CENPN,FKBP5,B2M,AZGP1,B4GALT1,PTPN21,ABCC4,HMGCS1,PDLIM5,UAP1,HMGCR,BMPR1B,SCD,NCOA4,TNFAIP8,IDI1,MYL12A,NDRG1,PGM3,TMPRSS2,FADS1,SMS,ELK4,HPGD,SLC26A2,CDK6,INSIG1,CDC14B
20	HALLMARK_IL6_JAK_STAT3_SIGNALING	0.364484	2.68459	0.00726197	0.305403	0.0172904	80	TNF,CXCL10,IL17RB,IL1R2,CXCL9,CXCL13,CCL7,TLR2,IL7,IL6,PTPN2,IL18R1,OSMR,IRF1,STAT3,IL1B,CXCL11,IL2RG,CXCL1
21	HALLMARK_PROTEIN_SECRETION	0.331359	2.60089	0.00929834	0.373178	0.0207506	94	RPS6KA3,VPS4B,ADAM10,COPB1,DNM1L,MAPK1,BNIP3,RAB14,ANP32E,GOLGA4,OCRL,YKT6,ABCA1,ZW10,TPD52,EGFR,AP3S1,SH3GL2,SNX2,AP3B1,LMAN1,SCAMP1,ATP6V1B1,ATP7A,ICA1,STX7,TSG101,IGF2R,CTSC,STAM,SNAP23,SCAMP3,TOM1L1,SGMS1,USO1,ARFGEF2,KIF1B,SEC24D,DST,ARFGEF1,PAM
22	HALLMARK_APICAL_JUNCTION	-0.306739	-2.59188	0.00954528	0.380942	0.0207506	175	ACTA1,RRAS,SPEG,FBN1,ITGB1,KCNH2,LIMA1,SHROOM2,SIRPA,CD276,THY1,SDC3,WNK4,SKAP2,EVL,CDH6,GAMT,CLDN11,CERCAM,ICAM2,MAPK11,FLNC,ACTN2,BMP1,VWF,STX4,NLGN3,JAM3,CDH11,CD99,ADAM23,ACTG2,PPP2R2C,ITGA10,TSPAN4,CLDN5,TRO,CRAT,MDK,CALB2,IKBKG,GNAI2,NRXN2,PECAM1,CRB3,VCAN,ITGA3,MMP2,CLDN15,SORBS3,LAYN,CADM3,MPZL1,CD34
23	HALLMARK_SPERMATOGENESIS	0.345301	2.43574	0.0148615	0.526995	0.0309614	82	NPY5R,STRBP,AURKA,ELOVL3,PIAS2,BUB1,TTK,PRKAR2A,DBF4,CLPB,CSNK2A2,PSMG1,SLC12A2,NEK2,HSPA4L,TLE4,NEFH,MLLT10,CCNA1,AGFG1,MTOR,RFC4,CCNB2,IL12RB2,ART3,TOPBP1,LPIN1,IDE,CAMK4,EZH2,CDK1,SNAP91,LDHC
24	HALLMARK_HYPOXIA	0.287172	2.4103	0.0159393	0.55219	0.0318786	176	KDM3A,PLIN2,BHLHE40,CP,P4HA2,FOS,ANXA2,MAP3K1,PHKG1,NR3C1,SLC2A1,HK2,PKP1,BCL2,TMEM45A,PFKP,PPARGC1A,GPI,EGFR,NDST1,ATF3,PFKFB3,CDKN1B,GCNT2,ETS1,IL6,SLC2A5,STC2,TIPARP,FOXO3,NFIL3,ZFP36,CSRP2,EFNA3,CITED2,PDK1,ENO1,PGK1,P4HA1,HDLBP,ALDOC,LDHA,ADM,FAM162A,TPI1,SDC2,XPNPEP1,PGM2,PPFIA4,TNFAIP3,DTNA,SRPX,KLF6,NDRG1,CHST2,NEDD4L,ALDOA,KLHL24,SCARB1,DDIT4,GAPDH,ERRFI1,PAM,LDHC
25	HALLMARK_ANGIOGENESIS	-0.560717	-2.32462	0.0200924	0.637543	0.0386392	31	COL5A2,LRPAP1,SLCO2A1,NRP1,KCNJ8,JAG2,STC1,LPL,LUM,POSTN,TNFRSF21,SERPINA5,FSTL1,MSX1,THBD,FGFR1,COL3A1,PDGFA,TIMP1,VCAN
26	HALLMARK_BILE_ACID_METABOLISM	-0.324957	-2.05213	0.0401573	0.871174	0.0743654	88	ABCA8,EPHX2,PAOX,CROT,PEX16,ALDH1A1,DIO2,HSD17B11,RBP1,AMACR,PHYH,PEX6,CYP46A1,SLC22A18,FDXR,PECR,ABCA9,ALDH9A1,SULT2B1,PEX11G,ABCD1,AR,SLC35B2,HSD3B7,PRDX5,LIPE,ABCA6,ABCA4,ABCA2,PIPOX
27	HALLMARK_COMPLEMENT	0.257976	1.73326	0.0830494	0.986899	0.148303	176	PLSCR1,GZMA,SERPINB2,USP16,CP,F5,CFB,SPOCK2,CCL5,C3,IL6,ADAM9,LTF,LCK,MMP12,L3MBTL4,GZMB,KYNU,GZMK,ME1,C1S,GP1BA,IRF1,CD40LG,TNFAIP3,LAP3,GNB4,DGKH,PSMB9,USP14,PIK3CA,CXCL1,KIF2A,PREP,CASP1,TFPI2
28	HALLMARK_GLYCOLYSIS	0.251753	1.67777	0.0933912	0.99257	0.161019	185	GNPDA1,PYGB,AURKA,PAXIP1,PLOD2,B4GALT1,LCT,GPR87,TGFA,HK2,ELF3,PFKP,EGFR,MDH2,AK3,SOX9,STC2,KIF20A,PKP2,SLC35A3,DEPDC1,EFNA3,CITED2,ENO1,LDHA,P4HA1,PGK1,FAM162A,ME1,HS6ST2,GOT1,PGM2,CLDN9,SLC25A13,PPFIA4,HOMER1,HMMR,ALDOA,DDIT4,SDHC,BPNT1,AGL,B3GNT3,DSC2,KIF2A,ME2,PAM,DLD,CDK1,PPIA,LDHC
29	HALLMARK_ESTROGEN_RESPONSE_LATE	0.246372	1.56645	0.117243	0.998041	0.195404	186	FLNB,TRIM29,SLC16A1,SORD,MICB,FKBP5,CYP26B1,IL17RB,FOS,KLK11,FRK,SLC7A5,MYB,CHPT1,IMPA2,HR,CKB,HSPA4L,AREG,LTF,FOXC1,CCNA1,KIF20A,FABP5,PRKAR2B,GJB3,KLK10,DHCR7,TPD52L1,LAMC2,TOP2A,PLK4,SCARB1,PERP,GAL,SLC26A2,STIL,KLF4,CDC20,TFPI2
30	HALLMARK_PI3K_AKT_MTOR_SIGNALING	0.26406	1.47075	0.141358	0.99951	0.227997	98	RPS6KA3,MYD88,MAPK1,IRAK4,PTEN,PRKAG1,DAPP1,SLC2A1,NCK1,MAPK8,SMAD2,MAPK10,PRKAR2A,UBE2D3,EGFR,TRIB3,ITPR2,ECSIT,CDKN1B,PRKCB,LCK,PIK3R3,MAPKAP1,PDK1,CDK2,PPP2R1B,ACTR2,TBK1,TIAM1,YWHAB,ACACA,ATF1,IL2RG,CAMK4,MAP3K7,CDK1,FASLG,EIF4E
31	HALLMARK_UV_RESPONSE_DN	-0.256802	-1.1508	0.249814	0.999999	0.389151	136	PTPRM,SCN8A,KCNMA1,COL5A2,RGS4,CACNA1A,MAGI2,LPAR1,F3,MAP1B,PPARG,MGLL,IGFBP5,MT1E,GRK5,COL1A2,FZD2,SLC22A18,COL11A1,ID1,RBPMS,COL3A1,PDGFRB,COL1A1,DBP,MMP16,MGMT,GCNT1
32	HALLMARK_P53_PATHWAY	0.225598	1.13389	0.25684	1	0.389151	186	KLK8,NOL8,SERPINB5,CCNG1,FOS,CDKN2B,STOM,TAP1,PLK2,TGFA,RPS12,ATF3,FAS,HSPA4L,SLC7A11,TM4SF1,EPS8L2,HDAC3,SLC19A2,TP63,KRT17,IRAK1,TPD52L1,RNF19B,PTPN14,NDRG1,HINT1,PERP,LDHB,KLF4,CASP1,RGS16
33	HALLMARK_OXIDATIVE_PHOSPHORYLATION	0.222908	1.05708	0.290477	1	0.415442	182	SUPV3L1,NDUFS1,HSPA9,PDHA1,HCCS,NNT,NDUFS2,MTRR,COX10,UQCRC1,UQCRFS1,COX6B1,CYC1,ACO2,CYCS,GRPEL1,MDH1,FXN,NDUFB5,GPI,PDHX,MDH2,NDUFA9,SLC25A5,CS,ALAS1,FH,SDHB,SDHA,GLUD1,UQCRH,VDAC1,AFG3L2,PDHB,MFN2,LDHA,BCKDHA,COX7B,TIMM50,MRPS22,IDH3B,SUCLG1,MRPL15,ABCB7,DLAT,SLC25A3,IMMT,PMPCA,HADHA,SDHC,OPA1,OGDH,LDHB,DLD,AIFM1,UQCRC2,LRPPRC
34	HALLMARK_UV_RESPONSE_UP	0.226756	1.05635	0.290809	1	0.415442	144	SOD2,FOS,CDKN2B,ASNS,AQP3,TAP1,STIP1,FOSB,PPAT,TGFBRAP1,PPIF,NR4A1,ATF3,ALAS1,E2F5,IL6,CHRNA5,RFC4,MAPK8IP2,HSPA13,AMD1,TYRO3,ICAM1,SIGMAR1,IRF1,TFRC,CLCN2,CEBPG,ALDOA,GAL,CXCL2,DDX21,CCNE1,DNAJA1,HLA-F
35	HALLMARK_APICAL_SURFACE	-0.321278	-0.993277	0.320575	1	0.445243	37	GSTM3,SHROOM2,THY1,AFAP1L2,HSPB1,MDGA1,CROCC
36	HALLMARK_HEDGEHOG_SIGNALING	-0.390608	-0.872289	0.38305	1	0.517636	31	CNTFR,NRCAM,THY1,CRMP1,RTN1,SCG2,HEY1,GLI1,ACHE
37	HALLMARK_IL2_STAT5_SIGNALING	0.20714	0.836736	0.402741	1	0.529922	187	IRF4,AHNAK,CXCL10,PLSCR1,NFKBIZ,PLIN2,RABGAP1L,IL1R2,AHR,CST7,IRF6,MYC,SLC39A8,HUWE1,ICOS,TNFRSF9,HK2,GLIPR2,EMP1,PLAGL1,IL2RB,PTCH1,LCLAT1,EOMES,LRRC8C,UMPS,NCS1,NFIL3,IGF2R,ANXA4,ENPP1,P4HA1,MXD1,CCR4,CDCP1,AHCY,IL18R1,IGF1R,GBP4,TNFSF10,CTLA4,CDC42SE2,KLF6,NDRG1,TTC39B,PDCD2L,PTGER2,CA2,CCNE1,RGS16
38	HALLMARK_APOPTOSIS	0.204751	0.758005	0.448448	1	0.5736	153	ETF1,TNF,DAP3,DNM1L,SOD2,TAP1,BRCA1,CD2,BIRC3,EMP1,SMAD7,PMAIP1,ATF3,FAS,MCL1,IL6,NEFH,CCNA1,IGF2R,ROCK1,CD69,PPP3R1,DPYD,CTNNB1,TNFSF10,IRF1,TOP2A,CYLD,IL1B,SATB1,FASLG,CASP1,DNAJA1,WEE1
39	HALLMARK_HEME_METABOLISM	0.205818	0.740692	0.45888	1	0.5736	164	SLC6A9,NEK7,PDZK1IP1,NNT,AQP3,ASNS,RIOK3,NR3C1,DCAF10,RCL1,SLC2A1,RNF19A,CPOX,E2F2,GAPVD1,HTATIP2,CAST,OPTN,RANBP10,C3,DCUN1D1,FOXO3,RHCE,ADD2,SLC7A11,GMPS,NCOA4,MOCOS,MFHAS1,TFRC,CA2,BACH1,SLC11A2
40	HALLMARK_ESTROGEN_RESPONSE_EARLY	-0.231294	-0.681288	0.495689	1	0.604499	186	MAPT,SCNN1A,INHBB,CBFA2T3,GFRA1,NBL1,CA12,BLVRB,DHRS3,HSPB8,SYNGR1,RHOD,WFS1,OLFML3,MPPED2,RAB17,SEMA3B,PDZK1,MLPH,PGR,IGFBP4,CALB2,SULT2B1,DHRS2,ABAT,REEP1,AR,CXCL12,THSD4,TFF3,CLIC3,TUBB2B
41	HALLMARK_REACTIVE_OXYGEN_SPECIES_PATHWAY	0.24871	0.584789	0.55869	1	0.654546	44	PRDX1,PFKP,MBP,OXSR1,SOD2,NDUFS2,IPCEF1,GCLM,TXNRD1,ABCC1,NQO1,PRDX2,MGST1,GLRX,PRDX6
42	HALLMARK_ADIPOGENESIS	0.17951	0.578526	0.562909	1	0.654546	184	PLIN2,STOM,RIOK3,ACLY,MDH2,CS,PFKFB3,C3,ADCY6,ESYT1,UBQLN1,BCKDHA,ME1,ACADL,DHCR7,G3BP2,ATL2,ANGPT1,TKT,SORBS1,AK2,COQ3,IMMT,YWHAG,ALDOA,SCARB1,MCCC1,LEP,DLD,SLC5A6
43	HALLMARK_TGF_BETA_SIGNALING	-0.23736	-0.179021	0.857921	1	0.974911	53	PPP1CA,ACVR1,SMAD6,SERPINE1,NCOR2,ID3,CDK9,FURIN,CDKN1C,ENG,ID2,TGFB1,TGIF1,ID1,LTBP2,THBS1,BCAR3,SMAD3,RAB31
44	HALLMARK_PEROXISOME	-0.213989	-0.121412	0.903365	1	0.994773	90	EPHX2,HMGCL,DLG4,ABCB9,DHRS3,ALDH1A1,HSD17B11,CTBP1,PEX6,CADM1,CRABP1,CRAT,CLN8,SULT2B1,ALDH9A1,TSPO,ABCD1,ELOVL5,SLC35B2,HSD3B7,PRDX5,ESR2,ABCB4,CRABP2
45	HALLMARK_PANCREAS_BETA_CELLS	-0.432562	-0.106493	0.915192	1	0.994773	19	HNF1A,STXBP1,LMO2,SYT13,DPP4,PCSK1,SEC11A,SRP14
46	HALLMARK_NOTCH_SIGNALING	-0.234473	0	1	1	1	32	FZD1,DLL1,LFNG,DTX1,FZD5,RBX1,WNT2,HEYL
47	HALLMARK_FATTY_ACID_METABOLISM	-0.186081	0	1	1	1	138	HSD17B11,CA6,ACADS,MGLL,CD1D,EPHX1,ENO3,XIST,ACOT2,G0S2,REEP6,ALDH3A1,MIF,CRAT,VNN1,AOC3,ERP29,ALDH1A1
48	HALLMARK_DNA_REPAIR	-0.183478	0	1	1	1	139	GTF2H5,EDF1,CDA,POLD4,BCAM,COX17,SURF1,VPS37D,BCAP31,CETN2,NME3,SAC3D1,GPX4,USP11,SUPT4H1,TK2,NME4,DGUOK,POLR2J,RBX1,TAF6,RRM2B,ZNF707,TP53,NT5C,MPG,ITPA,DAD1,CANT1,LIG1,POLR3GL,ARL6IP1
49	HALLMARK_WNT_BETA_CATENIN_SIGNALING	-0.210939	0	1	1	1	40	FZD1,TP53,NCOR2,NOTCH4,DLL1,HDAC11,LEF1,JAG2,HEY1,AXIN2
