# Supplementary material
Source: Research Square preprint supplement (doi:10.21203/rs.3.rs-9572543/v1)
Supplement: Supplementary file 3 [file 1a6a2d59ef4695cf5e407eb8.xlsx]

## Sheet: TableS6
p_val	avg_log2FC	pct.1	pct.2	p_val_adj	cluster	gene
0	2.6852	0.806	0.216	0	0	CD3E
0	2.533	0.842	0.277	0	0	TRAC
0	1.87765	0.848	0.369	0	0	PTPRC
0	2.83548	0.576	0.144	0	0	GZMA
0	2.80091	0.532	0.105	0	0	CD247
0	2.39713	0.607	0.202	0	0	CCL5
0	2.71551	0.508	0.106	0	0	CD3G
0	1.79861	0.677	0.291	0	0	IL2RG
0	2.59038	0.488	0.143	0	0	IL7R
0	2.50962	0.538	0.199	0	0	CD8A
0	2.66297	0.393	0.1	0	0	NKG7
0	2.67958	0.354	0.084	0	0	PRF1
0	2.47871	0.341	0.079	0	0	TIGIT
0	1.34758	0.448	0.196	0	0	CYTIP
0	0.913836	0.683	0.442	0	0	CD4
0	1.39533	0.49	0.251	0	0	LPXN
0	1.58174	0.375	0.142	0	0	SELL
0	2.68834	0.294	0.063	0	0	CXCR6
0	2.71143	0.293	0.068	0	0	CTLA4
0	0.530433	0.531	0.312	0	0	SLAMF7
0	0.858738	0.611	0.393	0	0	CXCL9
0	1.3943	0.426	0.213	0	0	SERPINB9
0	1.65257	0.332	0.125	0	0	SLAMF1
0	0.642945	0.753	0.546	0	0	LYZ
0	1.76713	0.289	0.101	0	0	CD27
0	2.42159	0.221	0.052	0	0	CCR7
0	1.40386	0.318	0.162	0	0	GPR183
0	2.29501	0.22	0.069	0	0	KLRD1
0	1.90139	0.229	0.081	0	0	CD69
0	2.1502	0.22	0.073	0	0	KLRB1
0	1.45539	0.263	0.117	0	0	LTB
0	0.894141	0.571	0.425	0	0	ATM
0	1.03108	0.42	0.277	0	0	ADGRE5
0	2.14657	0.211	0.071	0	0	TCF7
0	1.46295	0.232	0.095	0	0	RHOH
0	0.973329	0.372	0.241	0	0	HAVCR2
0	0.861037	0.542	0.412	0	0	S100A4
0	0.746379	0.48	0.35	0	0	CXCR4
0	0.785096	0.433	0.305	0	0	TGFB1
0	2.39939	0.184	0.059	0	0	FOXP3
0	0.823235	0.408	0.285	0	0	GLIPR1
0	0.421247	0.465	0.345	0	0	FGL2
0	1.66569	0.203	0.085	0	0	GZMB
0	0.761564	0.565	0.447	0	0	FAM107B
0	0.557905	0.351	0.235	0	0	PRDM1
0	0.951659	0.371	0.257	0	0	TMEM173
0	1.55978	0.241	0.128	0	0	LAG3
0	0.435043	0.464	0.357	0	0	AIF1
0	1.82353	0.179	0.074	0	0	KLRC1
0	0.373856	0.389	0.285	0	0	C1QA
0	0.282025	0.525	0.424	0	0	CD68
0	0.513644	0.366	0.265	0	0	APOC1
0	1.76401	0.179	0.079	0	0	DUSP2
0	0.678333	0.331	0.246	0	0	BCL2
0	0.743829	0.46	0.378	0	0	SMAP2
0	2.68993	0.112	0.032	0	0	GNLY
0	1.78961	0.116	0.041	0	0	IFNG
0	1.17844	0.199	0.129	0	0	CDC14A
0	2.36931	0.049	0.011	0	0	PDCD1
0	2.2816	0.029	0.006	0	0	GZMK
0	0.297197	0.998	0.991	0	0	B2M
1.04994e-282	0.435139	0.181	0.111	5.68018e-280	0	PTGDS
7.09189e-271	0.435891	0.33	0.244	3.83671e-268	0	IGSF6
3.69207e-253	0.365716	0.221	0.146	1.99741e-250	0	CCR2
8.91896e-252	1.28837	0.087	0.044	4.82516e-249	0	IL2RA
2.4156e-236	0.808612	0.253	0.193	1.30684e-233	0	GATA3
1.10734e-213	0.428297	0.499	0.455	5.99073e-211	0	VOPP1
1.54082e-208	0.273355	0.389	0.306	8.33583e-206	0	C1QC
7.22424e-206	0.759369	0.301	0.248	3.90832e-203	0	PIM1
1.02225e-188	0.464222	0.47	0.426	5.53036e-186	0	CDC25B
9.1966e-176	0.188929	0.483	0.407	4.97536e-173	0	FCER1G
1.04976e-167	0.168208	0.509	0.43	5.67921e-165	0	ZEB2
3.34318e-164	0.668203	0.253	0.197	1.80866e-161	0	IDO1
4.37013e-150	0.976678	0.13	0.088	2.36424e-147	0	TNF
3.71987e-147	0.586798	0.331	0.292	2.01245e-144	0	ERN1
1.2199e-121	0.315977	0.586	0.589	6.59964e-119	0	TOMM7
8.45826e-114	1.02044	0.087	0.057	4.57592e-111	0	AQP3
1.42849e-67	0.170521	0.613	0.609	7.72812e-65	0	PTEN
6.74851e-54	0.323981	0.214	0.184	3.65094e-51	0	ZEB1
1.49002e-53	0.318869	0.2	0.169	8.06103e-51	0	CD86
9.35937e-43	0.837732	0.055	0.039	5.06342e-40	0	CD80
4.45771e-31	0.200007	0.341	0.32	2.41162e-28	0	BASP1
1.0067e-27	0.391668	0.14	0.123	5.44625e-25	0	PDCD1LG2
5.47936e-27	0.139289	0.199	0.238	2.96434e-24	0	CD83
9.0041e-27	0.133315	0.204	0.183	4.87122e-24	0	MNDA
1.01487e-26	0.44187	0.217	0.205	5.49045e-24	0	APOBEC3B
2.42316e-19	0.129284	0.149	0.132	1.31093e-16	0	CCL8
8.03256e-18	0.488017	0.048	0.038	4.34561e-15	0	CX3CR1
3.54083e-17	0.178288	0.065	0.081	1.91559e-14	0	C2orf42
4.2989e-13	0.117513	0.101	0.119	2.3257e-10	0	PDE4A
6.94142e-10	0.126147	0.554	0.591	3.75531e-07	0	MAPK1
1.90211e-08	0.212841	0.14	0.133	1.02904e-05	0	DUSP5
2.82237e-06	0.176133	0.111	0.125	0.0015269	0	FAM49A
6.65902e-06	0.501484	0.054	0.062	0.00360253	0	KLRF1
0.00558146	0.237526	0.056	0.053	1	0	CLECL1
0	3.0249	0.701	0.161	0	1	BMP7
0	2.26846	0.864	0.338	0	1	DSP
0	2.63975	0.836	0.313	0	1	SCD
0	1.60555	0.926	0.406	0	1	KRT7
0	2.60473	0.777	0.258	0	1	CDH1
0	2.02457	0.954	0.448	0	1	EPCAM
0	3.7313	0.51	0.048	0	1	FOXA1
0	2.27823	0.636	0.209	0	1	SDC4
0	2.03981	0.946	0.532	0	1	TPD52
0	1.87708	0.945	0.533	0	1	KRT8
0	1.97838	0.851	0.444	0	1	CCDC6
0	1.45771	0.715	0.313	0	1	DSC2
0	1.90944	0.647	0.264	0	1	SQLE
0	0.778145	0.673	0.293	0	1	TACSTD2
0	2.33497	0.55	0.17	0	1	KLF5
0	0.924424	0.966	0.603	0	1	CD24
0	1.63663	0.636	0.283	0	1	ERBB2
0	0.944488	0.689	0.336	0	1	VEGFA
0	1.44199	0.737	0.385	0	1	CDC25B
0	3.77231	0.391	0.045	0	1	SCGB2A1
0	1.45384	0.674	0.338	0	1	CD9
0	1.83384	0.532	0.207	0	1	EEF2K
0	1.52519	0.534	0.215	0	1	MYO5B
0	1.46306	0.581	0.262	0	1	SVIL
0	1.37659	0.708	0.392	0	1	CTTN
0	1.28833	0.557	0.265	0	1	CCNB1
0	1.56692	0.533	0.245	0	1	DNTTIP1
0	1.2925	0.746	0.464	0	1	NARS
0	1.82019	0.448	0.168	0	1	MASTL
0	3.07729	0.311	0.034	0	1	AR
0	1.52361	0.482	0.208	0	1	FASN
0	2.65965	0.333	0.059	0	1	SERHL2
0	1.23524	0.589	0.318	0	1	SRPK1
0	0.813569	0.722	0.459	0	1	HMGA1
0	1.3011	0.541	0.282	0	1	ZNF562
0	1.23074	0.47	0.212	0	1	CDC20
0	1.44816	0.469	0.214	0	1	AURKA
0	1.26687	0.523	0.269	0	1	ACTG2
0	1.78034	0.314	0.081	0	1	MLPH
0	1.52652	0.419	0.188	0	1	FOXC1
0	1.02336	0.486	0.255	0	1	TOP2A
0	1.40251	0.401	0.182	0	1	CENPF
0	0.815816	0.488	0.27	0	1	WEE1
0	1.35082	0.384	0.179	0	1	S100A14
0	1.37592	0.374	0.169	0	1	JUP
0	1.90801	0.301	0.103	0	1	C6orf132
0	1.62442	0.337	0.14	0	1	HOOK2
0	1.31847	0.362	0.167	0	1	TRAF4
0	0.525141	0.69	0.497	0	1	SMS
0	0.395461	0.625	0.433	0	1	SEC11C
0	0.732236	0.762	0.579	0	1	HIF1A
0	1.54799	0.298	0.119	0	1	AURKB
0	0.863096	0.426	0.247	0	1	SLC5A6
0	1.06678	0.343	0.171	0	1	CCNA2
0	0.474818	0.614	0.443	0	1	FAM107B
0	2.59622	0.195	0.025	0	1	MUC6
0	0.892194	0.374	0.204	0	1	RTKN2
0	0.939945	0.353	0.198	0	1	KARS
0	1.24886	0.269	0.124	0	1	MKI67
0	0.62261	0.484	0.342	0	1	QARS
0	0.462708	0.617	0.476	0	1	TRAPPC3
0	1.50625	0.204	0.066	0	1	AKR1C1
0	1.16435	0.268	0.131	0	1	PCLAF
0	0.606082	0.32	0.184	0	1	GATA3
0	0.431967	0.511	0.386	0	1	LARS
0	0.575269	0.688	0.569	0	1	MAPK1
0	0.377765	0.352	0.237	0	1	E2F3
0	0.796717	0.243	0.144	0	1	TFAP2A
0	2.24082	0.102	0.019	0	1	AGR3
1.02485e-307	0.670355	0.207	0.124	5.54446e-305	1	USP53
2.79721e-283	0.372207	0.54	0.431	1.51329e-280	1	CREBBP
4.23122e-277	1.0835	0.062	0.024	2.28909e-274	1	HPX
2.38594e-254	0.214586	0.613	0.459	1.29079e-251	1	ENAH
2.52435e-245	0.716647	0.167	0.1	1.36567e-242	1	LYPD3
9.10123e-245	0.779965	0.145	0.083	4.92377e-242	1	DAPK3
1.58872e-201	0.945572	0.043	0.016	8.59499e-199	1	DNAAF1
2.39187e-195	0.389662	0.269	0.19	1.294e-192	1	TIFA
7.95454e-174	0.127122	0.616	0.504	4.3034e-171	1	WARS
1.98709e-133	0.602077	0.071	0.039	1.07501e-130	1	OXTR
1.31655e-123	0.213021	0.143	0.095	7.12253e-121	1	PPARG
1.15449e-121	0.165336	0.466	0.382	6.2458e-119	1	RB1
2.14772e-120	0.522654	0.154	0.107	1.16192e-117	1	LGALSL
2.76718e-118	0.342016	0.285	0.221	1.49704e-115	1	OCIAD2
7.0027e-104	0.184662	0.27	0.207	3.78846e-101	1	TRIB1
8.92348e-100	0.243307	0.254	0.196	4.8276e-97	1	SH3YL1
1.99753e-93	0.989349	0.041	0.021	1.08067e-90	1	UnassignedCodeword-0122
1.27169e-90	0.319065	0.183	0.137	6.87984e-88	1	THAP2
1.79124e-82	0.204219	0.469	0.4	9.69062e-80	1	TMEM147
7.19848e-80	0.311084	0.059	0.035	3.89438e-77	1	SOX17
5.24582e-71	0.338769	0.171	0.131	2.83799e-68	1	PTRHD1
9.86688e-51	0.101848	0.504	0.44	5.33798e-48	1	ADAM9
2.0954e-46	0.210086	0.1	0.075	1.13361e-43	1	C2orf42
1.68359e-44	0.125276	0.175	0.142	9.10821e-42	1	LAG3
1.76148e-31	0.26633	0.02	0.012	9.52959e-29	1	ABCC11
4.17931e-25	0.114799	0.164	0.14	2.26101e-22	1	STXBP4
1.81021e-20	0.16186	0.039	0.029	9.79325e-18	1	CTH
0	2.38016	0.828	0.271	0	2	C1QC
0	2.34266	0.807	0.254	0	2	C1QA
0	2.44615	0.751	0.211	0	2	IGSF6
0	2.16974	0.909	0.374	0	2	FCER1G
0	2.2355	0.927	0.394	0	2	CD68
0	2.28221	0.768	0.241	0	2	CD163
0	2.12311	0.836	0.32	0	2	FGL2
0	2.24951	0.731	0.239	0	2	APOC1
0	2.12657	0.738	0.249	0	2	CD14
0	2.57815	0.634	0.147	0	2	MRC1
0	1.79713	0.817	0.333	0	2	AIF1
0	1.89871	0.684	0.223	0	2	HAVCR2
0	1.60051	0.899	0.441	0	2	CD4
0	2.18539	0.669	0.212	0	2	FCGR3A
0	2.35983	0.572	0.127	0	2	ITGAX
0	2.04417	0.977	0.542	0	2	LYZ
0	2.13749	0.541	0.14	0	2	CD86
0	1.22869	0.785	0.411	0	2	ZEB2
0	1.82007	0.516	0.156	0	2	MNDA
0	1.50239	0.732	0.4	0	2	CXCL9
0	1.05102	0.648	0.319	0	2	SLAMF7
0	2.16257	0.419	0.107	0	2	ITGAM
0	0.415188	0.732	0.42	0	2	PTPRC
0	3.03091	0.324	0.043	0	2	HK3
0	2.39506	0.352	0.082	0	2	C15orf48
0	1.90207	0.364	0.103	0	2	PDCD1LG2
0	1.43939	0.484	0.227	0	2	CXCL16
0	2.20554	0.364	0.113	0	2	CCL8
0	0.158084	0.548	0.31	0	2	PECAM1
0	0.775321	0.496	0.287	0	2	GLIPR1
0	0.601488	0.504	0.309	0	2	TGFB1
0	1.14418	0.398	0.216	0	2	CD83
0	1.45115	0.275	0.105	0	2	CD274
0	0.445962	0.473	0.309	0	2	BASP1
0	0.450307	0.432	0.276	0	2	LPXN
0	0.581581	0.377	0.235	0	2	SERPINB9
0	0.706929	0.512	0.374	0	2	CDKN1A
0	0.491843	0.518	0.382	0	2	RB1
0	0.503185	0.641	0.508	0	2	WARS
0	1.80225	0.143	0.032	0	2	CD80
0	1.01412	0.219	0.113	0	2	PTGDS
0	1.12009	0.131	0.046	0	2	LY86
0	1.0516	0.113	0.045	0	2	IL2RA
0	2.39871	0.085	0.028	0	2	MMP12
6.48501e-275	0.374761	0.583	0.451	3.50839e-272	2	VOPP1
1.57924e-219	0.670422	0.295	0.197	8.54371e-217	2	IDO1
5.61662e-161	0.704913	0.121	0.066	3.03859e-158	2	PDK4
6.71572e-153	0.297274	0.651	0.562	3.6332e-150	2	NFKBIA
3.45223e-152	0.29333	0.468	0.362	1.86765e-149	2	CXCR4
2.93896e-149	0.686835	0.095	0.049	1.58998e-146	2	S100A8
8.01726e-143	0.518919	0.244	0.17	4.33734e-140	2	MAP3K8
3.53216e-126	0.323698	0.258	0.181	1.9109e-123	2	GPR183
3.90092e-118	0.259295	0.38	0.293	2.1104e-115	2	ADGRE5
8.38561e-114	0.470176	0.176	0.118	4.53661e-111	2	FAM49A
3.52228e-113	0.983337	0.109	0.066	1.90555e-110	2	APOBEC3A
2.14584e-97	0.426318	0.088	0.051	1.1609e-94	2	CLECL1
8.13025e-89	0.430516	0.144	0.097	4.39847e-86	2	PPARG
3.78164e-86	0.19822	0.519	0.442	2.04587e-83	2	ADAM9
6.04415e-79	0.132401	0.453	0.375	3.26988e-76	2	CCPG1
5.39292e-65	0.12895	0.448	0.386	2.91757e-62	2	SMAP2
6.10172e-59	0.169766	0.164	0.122	3.30103e-56	2	MMP1
1.31931e-40	0.270047	0.123	0.092	7.13745e-38	2	TNF
4.52431e-31	0.207725	0.142	0.114	2.44765e-28	2	PDE4A
9.64293e-29	0.159707	0.463	0.43	5.21683e-26	2	S100A4
0.000135751	0.103079	0.045	0.039	0.0734413	2	CX3CR1
0	4.42237	0.897	0.086	0	3	TCIM
0	2.5694	0.941	0.219	0	3	SFRP1
0	4.31664	0.769	0.07	0	3	SPIB
0	2.50399	0.765	0.206	0	3	E2F3
0	3.68565	0.587	0.047	0	3	TUBB2B
0	1.87576	0.744	0.215	0	3	BCL2
0	2.41014	0.97	0.454	0	3	LDHB
0	1.88505	0.69	0.189	0	3	CD83
0	2.1158	0.742	0.259	0	3	WEE1
0	1.97215	0.93	0.455	0	3	HMGA1
0	0.741877	0.94	0.477	0	3	EPCAM
0	0.811154	0.806	0.373	0	3	DSP
0	0.936724	0.701	0.294	0	3	CDH1
0	4.20619	0.423	0.025	0	3	SSTR2
0	1.69199	0.61	0.214	0	3	EIF4EBP1
0	0.956724	0.733	0.338	0	3	CXCR4
0	0.99695	0.792	0.399	0	3	FLNB
0	1.27574	0.739	0.351	0	3	CD9
0	0.852817	0.939	0.556	0	3	KRT8
0	1.00399	0.826	0.448	0	3	ENAH
0	1.48026	0.616	0.239	0	3	SLC5A6
0	0.89326	0.99	0.621	0	3	CD24
0	1.27555	0.734	0.372	0	3	LARS
0	1.32462	0.898	0.539	0	3	NFKBIA
0	0.698692	0.561	0.204	0	3	AQP1
0	1.43403	0.549	0.198	0	3	PELI1
0	1.12152	0.675	0.325	0	3	SRPK1
0	1.55196	0.52	0.177	0	3	S100A14
0	0.48238	0.677	0.339	0	3	DSC2
0	0.888001	0.695	0.358	0	3	CDKN1A
0	1.33223	0.448	0.112	0	3	LTB
0	1.39034	0.535	0.202	0	3	EGFR
0	1.12837	0.595	0.277	0	3	CCNB1
0	0.777577	0.621	0.304	0	3	ERBB2
0	0.695836	0.61	0.297	0	3	BASP1
0	2.04639	0.394	0.082	0	3	LPL
0	1.78605	0.443	0.131	0	3	TFAP2A
0	0.625119	0.793	0.498	0	3	SMS
0	0.779916	0.685	0.391	0	3	STAT3
0	1.70628	0.386	0.095	0	3	CD274
0	0.679832	0.768	0.478	0	3	NARS
0	0.427165	0.613	0.329	0	3	IL2RG
0	0.765717	0.493	0.21	0	3	BMP7
0	1.09435	0.474	0.204	0	3	RTKN2
0	0.693189	0.51	0.244	0	3	SDC4
0	1.01005	0.529	0.264	0	3	TOP2A
0	0.886514	0.443	0.184	0	3	IDO1
0	1.54692	0.349	0.096	0	3	KIT
0	0.522802	0.788	0.536	0	3	MDM2
0	0.131628	0.614	0.362	0	3	VEGFA
0	0.666907	0.592	0.34	0	3	QARS
0	1.74741	0.302	0.056	0	3	IL3RA
0	0.436899	0.718	0.474	0	3	TRAPPC3
0	0.787838	0.448	0.211	0	3	BACE2
0	0.492733	0.795	0.558	0	3	RUNX1
0	1.0421	0.408	0.173	0	3	TRAF4
0	0.653397	0.498	0.265	0	3	DNTTIP1
0	0.874763	0.427	0.199	0	3	FOXC1
0	0.828845	0.452	0.23	0	3	AURKA
0	0.960842	0.415	0.193	0	3	CENPF
0	0.430362	0.786	0.57	0	3	TOMM7
0	3.04867	0.24	0.031	0	3	MYBPC1
0	0.741458	0.419	0.212	0	3	OCIAD2
0	0.350884	0.444	0.241	0	3	MYO5B
0	0.862717	0.299	0.103	0	3	KRT14
0	1.96149	0.252	0.057	0	3	DMKN
0	0.271783	0.439	0.246	0	3	TCF4
0	0.455672	0.388	0.206	0	3	KLF5
0	1.08037	0.992	0.812	0	3	PKM
0	0.766369	0.263	0.09	0	3	CD69
0	1.07316	0.25	0.081	0	3	TNF
0	0.545249	0.283	0.12	0	3	ITGAM
0	0.897924	0.293	0.136	0	3	PCLAF
0	0.234711	0.268	0.112	0	3	MMP1
0	0.883099	0.28	0.13	0	3	AURKB
0	0.113311	0.321	0.175	0	3	GPR183
0	0.433419	0.323	0.185	0	3	JUP
0	0.520379	0.285	0.156	0	3	HOOK2
0	0.541305	0.251	0.134	0	3	MKI67
0	0.137183	0.195	0.084	0	3	TCF7
0	0.421118	0.182	0.072	0	3	DCLK1
0	0.679184	0.19	0.096	0	3	CDC42EP1
0	2.09294	0.082	0.016	0	3	FCER1A
2.87349e-290	0.123219	0.173	0.083	1.55456e-287	3	KLRC1
7.55292e-282	0.459832	0.067	0.022	4.08613e-279	3	CLEC9A
1.05378e-276	0.319605	0.24	0.134	5.70092e-274	3	THAP2
7.93333e-256	0.678137	0.079	0.03	4.29193e-253	3	FOXC2
2.83173e-248	0.199824	0.459	0.304	1.53197e-245	3	ZNF562
1.0574e-244	0.146035	0.177	0.092	5.72054e-242	3	CDC14B
2.28791e-239	0.503085	0.192	0.106	1.23776e-236	3	LGALSL
9.65333e-231	0.183393	0.754	0.569	5.22245e-228	3	MAPK1
8.33943e-230	0.218027	0.367	0.234	4.51163e-227	3	FASN
7.55401e-226	0.509251	0.2	0.114	4.08672e-223	3	CCNE1
9.01376e-213	0.391713	0.21	0.123	4.87644e-210	3	C6orf132
1.09565e-189	0.123247	0.3	0.191	5.92749e-187	3	TIFA
1.52814e-189	0.943743	0.064	0.025	8.26722e-187	3	NCAM1
6.43243e-175	0.179513	0.55	0.397	3.47994e-172	3	TMEM147
1.04216e-169	0.832651	0.043	0.015	5.63808e-167	3	CCNA1
3.47302e-166	3.02218	0.012	0.001	1.8789e-163	3	NegControlCodeword-0526
1.69659e-156	0.140796	0.252	0.163	9.17856e-154	3	SLC25A37
3.73044e-148	0.30218	0.206	0.13	2.01817e-145	3	PTRHD1
1.17159e-132	0.55148	0.026	0.008	6.33829e-130	3	UCP1
1.43866e-122	0.400968	0.078	0.04	7.78314e-120	3	OXTR
4.76453e-122	0.145384	0.209	0.137	2.57761e-119	3	STXBP4
0	4.29111	0.76	0.087	0	4	MZB1
0	3.40805	0.95	0.297	0	4	TENT5C
0	2.64768	0.909	0.297	0	4	SLAMF7
0	3.1956	0.638	0.115	0	4	CCR2
0	2.87076	0.95	0.431	0	4	ITM2C
0	3.09819	0.579	0.076	0	4	CD79A
0	2.06122	0.791	0.289	0	4	PECAM1
0	2.4879	0.712	0.212	0	4	PRDM1
0	2.35311	0.876	0.422	0	4	SEC11C
0	1.88581	0.626	0.201	0	4	CYTIP
0	2.24797	0.71	0.3	0	4	SEC24A
0	1.69181	0.707	0.353	0	4	CCPG1
0	2.15073	0.499	0.168	0	4	RAB30
0	3.47809	0.366	0.036	0	4	TNFRSF17
0	2.08413	0.519	0.189	0	4	TRIB1
0	0.635249	0.661	0.397	0	4	LUM
0	2.34186	0.372	0.113	0	4	DUSP5
0	1.46034	0.534	0.277	0	4	ERN1
0	0.995602	0.679	0.428	0	4	ATM
0	1.0818	0.42	0.17	0	4	CAV1
0	1.07331	0.684	0.442	0	4	VOPP1
0	0.498456	0.807	0.568	0	4	TPD52
0	1.43563	0.376	0.139	0	4	SLAMF1
0	0.657121	0.504	0.307	0	4	BASP1
0	1.4443	0.305	0.116	0	4	CD27
0	0.486114	0.573	0.393	0	4	CXCL12
0	0.824701	0.423	0.248	0	4	TCF4
0	0.349238	0.478	0.311	0	4	POSTN
0	0.823145	0.295	0.137	0	4	SFRP4
0	0.617757	0.431	0.277	0	4	LPXN
0	0.330927	0.441	0.289	0	4	MMP2
0	0.966497	0.244	0.106	0	4	RHOH
0	1.10936	0.21	0.078	0	4	IGF1
0	1.42184	0.162	0.041	0	4	CD19
0	1.35478	0.166	0.05	0	4	CD79B
0	0.924218	0.325	0.216	0	4	ANKRD28
0	1.54242	0.136	0.038	0	4	ESR1
0	0.727369	0.639	0.55	0	4	MDM2
0	0.383405	0.999	0.991	0	4	B2M
6.45488e-300	1.15641	0.126	0.056	3.49209e-297	4	AQP3
3.72421e-234	0.180162	0.488	0.344	2.0148e-231	4	COL6A3
1.253e-228	0.510474	0.231	0.137	6.77873e-226	4	DPT
8.55036e-211	0.225778	0.413	0.297	4.62574e-208	4	CCDC80
3.29781e-210	0.554987	0.489	0.403	1.78412e-207	4	TMEM147
3.67759e-198	0.229252	0.484	0.353	1.98958e-195	4	FGL2
1.64187e-192	0.248201	0.474	0.343	8.8825e-190	4	IL2RG
5.02413e-187	0.725542	0.277	0.193	2.71806e-184	4	TIFA
1.07992e-148	0.288328	0.396	0.293	5.84236e-146	4	C1QA
5.18148e-142	0.325188	0.291	0.205	2.80318e-139	4	FAP
8.65693e-142	0.369884	0.332	0.244	4.6834e-139	4	FCGR3A
1.04059e-141	0.49677	0.161	0.098	5.62957e-139	4	LRRC15
3.09154e-138	0.345233	0.383	0.293	1.67252e-135	4	ADGRE5
1.29222e-106	0.330746	0.253	0.183	6.99091e-104	4	ZEB1
4.91249e-96	0.179742	0.398	0.312	2.65766e-93	4	C1QC
1.54813e-95	0.101636	0.67	0.571	8.37536e-93	4	LYZ
2.84751e-93	0.620259	0.078	0.044	1.5405e-90	4	IL6
4.38834e-86	0.228736	0.358	0.285	2.37409e-83	4	CD14
5.65563e-80	0.55152	0.159	0.112	3.05969e-77	4	PDE4A
1.25652e-72	0.227038	0.243	0.184	6.79775e-70	4	MRC1
3.52328e-71	0.265803	0.23	0.175	1.90609e-68	4	ADAM12
1.20656e-67	1.7011	0.015	0.004	6.52747e-65	4	UnassignedCodeword-0445
1.8254e-65	0.183496	0.493	0.454	9.8754e-63	4	ACTA2
2.09974e-65	0.661966	0.051	0.028	1.13596e-62	4	CTH
9.46703e-64	0.166996	0.363	0.299	5.12167e-61	4	GLIPR1
1.47489e-62	0.137164	0.441	0.368	7.97914e-60	4	AIF1
1.00249e-56	0.430707	0.133	0.096	5.42346e-54	4	CDC14B
4.97606e-54	0.148929	0.242	0.191	2.69205e-51	4	PDGFRA
9.08202e-44	0.20308	0.429	0.39	4.91337e-41	4	RB1
4.70975e-40	0.278811	0.346	0.308	2.54798e-37	4	TUBA4A
6.42536e-37	0.172588	0.422	0.388	3.47612e-34	4	SMAP2
2.2459e-31	0.36216	0.254	0.225	1.21503e-28	4	PELI1
1.16462e-27	0.281214	0.147	0.121	6.30059e-25	4	FAM49A
9.95479e-23	0.390168	0.05	0.035	5.38554e-20	4	RAPGEF3
5.76235e-15	0.103192	0.144	0.124	3.11743e-12	4	MMP1
2.18806e-10	0.191977	0.122	0.107	1.18374e-07	4	GJB2
2.36405e-09	0.284939	0.089	0.077	1.27895e-06	4	C2orf42
4.98235e-09	0.125696	0.27	0.256	2.69545e-06	4	PIM1
0	2.82135	0.961	0.304	0	5	COL6A3
0	2.73092	0.887	0.25	0	5	MMP2
0	2.89586	0.773	0.163	0	5	FAP
0	2.6172	0.881	0.277	0	5	POSTN
0	2.59717	0.74	0.141	0	5	PDGFRB
0	2.922	0.736	0.148	0	5	PDGFRA
0	2.52573	0.944	0.373	0	5	LUM
0	2.10166	0.797	0.264	0	5	CCDC80
0	2.5351	0.625	0.141	0	5	ADAM12
0	2.33574	0.585	0.151	0	5	CRISPLD2
0	2.99992	0.496	0.069	0	5	LRRC15
0	2.16537	0.637	0.227	0	5	FBLN1
0	1.62397	0.771	0.376	0	5	CXCL12
0	2.18715	0.505	0.114	0	5	DPT
0	3.10724	0.435	0.06	0	5	GFPT2
0	1.43402	0.621	0.268	0	5	MYLK
0	1.63236	0.76	0.431	0	5	ACTA2
0	2.26543	0.451	0.123	0	5	SFRP4
0	0.77879	0.725	0.418	0	5	ZEB2
0	0.977432	0.586	0.3	0	5	BASP1
0	2.79119	0.358	0.105	0	5	MMP1
0	1.07553	0.394	0.171	0	5	ZEB1
0	2.60247	0.312	0.091	0	5	GJB2
0	0.90785	0.465	0.245	0	5	TCF4
0	2.27139	0.285	0.08	0	5	C5orf46
0	0.787433	0.766	0.562	0	5	RUNX1
0	0.730628	0.792	0.594	0	5	PTEN
0	0.915604	0.615	0.417	0	5	S100A4
0	2.03715	0.255	0.062	0	5	PTN
0	0.577348	0.547	0.356	0	5	DST
0	0.372237	0.561	0.375	0	5	CCND1
0	0.516995	0.606	0.42	0	5	CTTN
0	0.493894	0.339	0.178	0	5	CAV1
0	0.571789	0.474	0.313	0	5	TGFB1
0	0.637044	0.424	0.263	0	5	TMEM173
0	0.827626	0.374	0.218	0	5	BACE2
0	1.39935	0.193	0.072	0	5	DCLK1
0	1.00999	0.155	0.068	0	5	HOXD8
2.2481e-302	1.17464	0.103	0.04	1.21622e-299	5	CLIC6
5.01394e-281	0.982825	0.165	0.083	2.71254e-278	5	IGF1
2.15589e-279	1.19376	0.06	0.018	1.16634e-276	5	TCEAL7
3.82751e-276	0.463859	0.535	0.406	2.07069e-273	5	STAT3
3.29153e-268	0.35853	0.626	0.467	1.78072e-265	5	ENAH
1.24145e-250	0.147789	0.597	0.426	6.71622e-248	5	CD68
7.75352e-247	0.716759	0.174	0.093	4.19465e-244	5	CDC14B
2.88002e-243	0.89543	0.076	0.028	1.55809e-240	5	PGR
8.9744e-210	1.04791	0.158	0.088	4.85515e-207	5	FSTL3
4.46655e-181	0.636313	0.184	0.11	2.4164e-178	5	PDE4A
2.76214e-155	1.00891	0.068	0.03	1.49432e-152	5	MMP12
1.38376e-154	0.225433	0.487	0.373	7.48613e-152	5	CCPG1
5.73887e-151	0.191553	0.554	0.422	3.10473e-148	5	FLNB
2.07988e-142	0.469186	0.464	0.379	1.12521e-139	5	CDKN1A
9.52485e-130	0.209202	0.339	0.244	5.15294e-127	5	FCGR3A
1.43051e-125	0.212681	0.547	0.44	7.73906e-123	5	ADAM9
4.08397e-114	0.134359	0.396	0.297	2.20943e-111	5	GLIPR1
1.53533e-102	1.01476	0.08	0.044	8.30613e-100	5	IL6
4.02796e-70	0.22098	0.168	0.118	2.17913e-67	5	PTGDS
4.31861e-58	0.210329	0.167	0.122	2.33637e-55	5	PDCD1LG2
6.10989e-57	0.444858	0.125	0.089	3.30545e-54	5	DAPK3
5.05657e-41	0.121943	0.355	0.301	2.7356e-38	5	SVIL
6.31924e-35	0.541904	0.058	0.038	3.41871e-32	5	SNAI1
2.87192e-28	0.522922	0.11	0.087	1.55371e-25	5	ALDH1A3
3.63148e-28	0.515441	0.051	0.034	1.96463e-25	5	ADH1B
8.49082e-28	0.366771	0.236	0.203	4.59353e-25	5	IDO1
1.40069e-23	0.598026	0.083	0.064	7.57772e-21	5	STC1
7.712e-13	0.128458	0.245	0.223	4.17219e-10	5	ANKRD28
1.38996e-12	0.765343	0.395	0.383	7.5197e-10	5	VEGFA
7.40656e-07	0.226442	0.114	0.103	0.000400695	5	CDC42EP1
0	3.13536	0.973	0.154	0	6	KRT5
0	2.99876	0.982	0.226	0	6	SFRP1
0	1.1247	0.923	0.3	0	6	TACSTD2
0	2.4254	0.941	0.34	0	6	VEGFA
0	2.1142	0.937	0.347	0	6	CCND1
0	2.29588	0.74	0.162	0	6	SH3YL1
0	1.45206	0.987	0.437	0	6	KRT7
0	2.39794	0.678	0.131	0	6	SLC25A37
0	1.85132	0.732	0.192	0	6	BACE2
0	2.31282	0.655	0.119	0	6	TFAP2A
0	0.988299	0.906	0.371	0	6	DSP
0	1.62084	0.915	0.395	0	6	FLNB
0	1.45218	0.989	0.479	0	6	EPCAM
0	1.42278	0.804	0.294	0	6	ERBB2
0	1.63937	0.705	0.209	0	6	FASN
0	1.4471	0.936	0.444	0	6	ENAH
0	1.10595	0.939	0.464	0	6	LDHB
0	1.51484	0.659	0.191	0	6	ANKRD28
0	1.17743	0.738	0.277	0	6	TUBA4A
0	0.833733	0.647	0.201	0	6	BMP7
0	0.801316	0.792	0.352	0	6	CD9
0	0.453216	0.736	0.296	0	6	CDH1
0	1.21859	0.928	0.492	0	6	SMS
0	0.752333	0.717	0.284	0	6	SQLE
0	1.31953	0.631	0.199	0	6	EGFR
0	2.54778	0.495	0.065	0	6	C5orf46
0	0.30666	0.76	0.337	0	6	DSC2
0	0.934775	0.835	0.418	0	6	ADAM9
0	0.74851	0.962	0.559	0	6	TPD52
0	0.60645	0.807	0.405	0	6	CTTN
0	1.68616	0.515	0.114	0	6	STXBP4
0	1.02724	0.62	0.22	0	6	CXCL16
0	0.873462	0.864	0.466	0	6	TRAPPC3
0	0.851715	0.776	0.381	0	6	TMEM147
0	0.453169	0.954	0.56	0	6	KRT8
0	1.10312	0.585	0.202	0	6	OCIAD2
0	1.92912	0.998	0.625	0	6	CD24
0	1.08639	0.594	0.221	0	6	EIF4EBP1
0	1.43266	0.557	0.185	0	6	CENPF
0	1.41972	0.588	0.22	0	6	CDC20
0	0.922323	0.92	0.552	0	6	RUNX1
0	1.04192	0.566	0.201	0	6	RTKN2
0	0.640972	0.782	0.42	0	6	CREBBP
0	1.11625	0.64	0.278	0	6	CCNB1
0	1.34559	0.501	0.141	0	6	HOOK2
0	0.210674	0.714	0.358	0	6	SCD
0	0.881368	0.595	0.246	0	6	SLC5A6
0	3.61321	0.369	0.022	0	6	NDUFA4L2
0	0.742344	0.551	0.21	0	6	AQP1
0	1.34396	0.421	0.094	0	6	KIT
0	0.417412	0.656	0.331	0	6	SRPK1
0	0.847772	0.516	0.196	0	6	FOXC1
0	1.33115	0.43	0.114	0	6	PTRHD1
0	0.806363	0.568	0.264	0	6	TOP2A
0	1.47082	0.43	0.128	0	6	PCLAF
0	0.691726	0.524	0.227	0	6	AURKA
0	0.492298	0.392	0.099	0	6	KRT23
0	0.20444	0.827	0.537	0	6	MDM2
0	2.1007	0.339	0.053	0	6	DMKN
0	0.55703	0.487	0.201	0	6	KLF5
0	0.372209	0.868	0.583	0	6	HIF1A
0	0.258996	0.556	0.278	0	6	ERN1
0	0.250411	0.557	0.28	0	6	WEE1
0	1.26021	0.373	0.102	0	6	CCNE1
0	0.169776	0.653	0.383	0	6	LARS
0	0.507794	0.477	0.208	0	6	PELI1
0	1.52864	0.352	0.09	0	6	GJB2
0	0.51175	0.332	0.093	0	6	SLPI
0	0.409693	0.423	0.189	0	6	MASTL
0	0.158649	0.499	0.268	0	6	DNTTIP1
0	0.293734	0.42	0.19	0	6	S100A14
0	0.715511	0.354	0.126	0	6	THAP2
0	1.75527	0.272	0.049	0	6	STC1
0	0.300053	0.422	0.203	0	6	KARS
0	1.15277	0.274	0.059	0	6	HOXD8
0	1.18985	0.293	0.078	0	6	FSTL3
0	0.829141	0.327	0.115	0	6	C6orf132
0	1.01333	0.307	0.098	0	6	LGALSL
0	0.44951	0.388	0.18	0	6	CCNA2
0	1.07823	0.28	0.074	0	6	ALDH1A3
0	0.428517	0.293	0.106	0	6	KRT14
0	1.52712	0.998	0.814	0	6	PKM
0	0.165127	0.365	0.184	0	6	JUP
0	0.244275	0.361	0.18	0	6	TRAF4
0	0.597676	0.31	0.13	0	6	AURKB
0	0.234138	0.268	0.112	0	6	FAM49A
0	0.295751	0.273	0.124	0	6	USP53
0	1.81482	0.187	0.043	0	6	S100A8
0	1.425	0.169	0.027	0	6	HOXD9
0	0.603564	0.182	0.051	0	6	KLRF1
0	0.367029	0.231	0.1	0	6	LYPD3
0	0.571001	0.16	0.043	0	6	NOSTRIN
0	0.662648	0.154	0.041	0	6	MYBPC1
0	0.872505	0.122	0.037	0	6	OXTR
0	1.17551	0.081	0.019	0	6	UnassignedCodeword-0122
0	0.473813	0.086	0.027	0	6	AKR1C3
0	0.574701	0.089	0.03	0	6	FOXC2
1.85327e-307	0.193574	0.209	0.1	1.00262e-304	6	LPL
2.19913e-288	0.544734	0.081	0.027	1.18973e-285	6	AGR3
8.77186e-220	0.617415	0.068	0.023	4.74558e-217	6	CXCL5
2.16925e-211	0.249302	0.732	0.503	1.17356e-208	6	WARS
2.71377e-191	0.238344	0.069	0.026	1.46815e-188	6	HPX
1.61162e-142	0.170054	0.063	0.026	8.71888e-140	6	NCAM1
0	4.95121	0.878	0.063	0	7	KRT23
0	5.5373	0.878	0.07	0	7	SERPINA3
0	5.24732	0.849	0.055	0	7	SLPI
0	5.24357	0.827	0.036	0	7	KRT6B
0	2.92424	0.943	0.158	0	7	KRT5
0	3.53194	0.986	0.296	0	7	TACSTD2
0	2.66191	0.923	0.326	0	7	DSC2
0	4.6501	0.624	0.029	0	7	CEACAM6
0	2.50211	0.991	0.438	0	7	KRT7
0	1.49564	0.859	0.354	0	7	CCND1
0	1.84446	0.776	0.281	0	7	SQLE
0	2.00761	0.689	0.196	0	7	EGFR
0	0.827966	0.956	0.483	0	7	EPCAM
0	1.44278	0.871	0.399	0	7	FLNB
0	1.99888	0.637	0.174	0	7	S100A14
0	2.12321	0.95	0.517	0	7	CD47
0	2.82068	0.508	0.083	0	7	MLPH
0	2.7671	0.493	0.08	0	7	LYPD3
0	1.36921	0.829	0.42	0	7	ADAM9
0	1.08029	0.86	0.451	0	7	ENAH
0	1.78092	0.584	0.179	0	7	APOBEC3B
0	1.29656	0.63	0.23	0	7	MYO5B
0	1.37952	0.617	0.221	0	7	CXCL16
0	1.75543	0.6	0.22	0	7	CDC20
0	0.475806	0.76	0.383	0	7	DSP
0	1.22813	0.843	0.469	0	7	TRAPPC3
0	1.15182	0.657	0.285	0	7	TUBA4A
0	0.935773	0.777	0.409	0	7	CTTN
0	1.24537	0.991	0.626	0	7	CD24
0	1.47502	0.587	0.222	0	7	EIF4EBP1
0	0.834206	0.72	0.358	0	7	CD9
0	0.921925	0.706	0.346	0	7	DST
0	1.84342	0.452	0.094	0	7	KRT14
0	0.453237	0.917	0.564	0	7	KRT8
0	2.48606	0.43	0.079	0	7	CDC42EP1
0	0.933445	0.85	0.499	0	7	SMS
0	0.926035	0.632	0.281	0	7	SVIL
0	1.24807	0.589	0.247	0	7	SLC5A6
0	1.38834	0.495	0.174	0	7	JUP
0	1.00511	0.553	0.235	0	7	PIM1
0	0.828743	0.596	0.278	0	7	ADGRE5
0	0.864099	0.596	0.278	0	7	WEE1
0	0.378387	0.622	0.306	0	7	CDH1
0	2.24716	0.376	0.067	0	7	ALDH1A3
0	1.01521	0.564	0.266	0	7	TOP2A
0	1.61832	0.381	0.098	0	7	KIT
0	1.90489	0.384	0.102	0	7	CCNE1
0	1.14934	0.437	0.156	0	7	MAP3K8
0	0.872247	0.473	0.202	0	7	KLF5
0	0.349067	0.499	0.242	0	7	FBLN1
0	0.823984	0.468	0.213	0	7	BACE2
0	0.594969	0.641	0.392	0	7	TMEM147
0	0.330533	0.554	0.314	0	7	ERBB2
0	0.73004	0.466	0.229	0	7	FASN
0	1.13362	0.412	0.178	0	7	CCNA2
0	0.832129	0.404	0.197	0	7	CENPF
0	0.637819	0.496	0.29	0	7	CCNB1
0	0.674737	0.406	0.205	0	7	FOXC1
0	1.51035	0.275	0.08	0	7	FSTL3
0	2.93864	0.206	0.016	0	7	RORC
0	1.14507	0.301	0.117	0	7	C6orf132
0	0.375637	0.455	0.272	0	7	DNTTIP1
0	0.619501	0.35	0.181	0	7	TRAF4
0	1.06665	0.258	0.102	0	7	LGALSL
0	0.552619	0.255	0.135	0	7	MKI67
0	0.424139	0.216	0.1	0	7	LPL
0	0.578047	0.159	0.063	0	7	APOBEC3A
0	0.599805	0.106	0.022	0	7	PIGR
1.84477e-306	0.408379	0.371	0.219	9.98019e-304	7	OCIAD2
9.3511e-306	0.138978	0.717	0.483	5.05894e-303	7	CCDC6
1.38017e-296	0.20052	0.63	0.418	7.46674e-294	7	S100A4
2.93323e-266	0.441368	0.382	0.238	1.58688e-263	7	AURKA
1.67397e-262	0.818539	0.147	0.068	9.05616e-260	7	DMKN
4.90374e-255	0.418045	0.234	0.128	2.65292e-252	7	USP53
9.02303e-236	0.372447	0.179	0.09	4.88146e-233	7	SERHL2
2.36304e-223	0.131372	0.388	0.241	1.2784e-220	7	EEF2K
6.9715e-219	0.449166	0.237	0.136	3.77158e-216	7	AURKB
1.31599e-212	0.178357	0.465	0.306	7.11949e-210	7	ZNF562
8.58448e-170	0.127705	0.266	0.164	4.6442e-167	7	SLC25A37
3.10436e-147	0.241117	0.251	0.16	1.67946e-144	7	HOOK2
8.09652e-122	0.10633	0.296	0.2	4.38021e-119	7	MASTL
3.29489e-104	0.541532	0.04	0.015	1.78254e-101	7	CCNA1
2.57486e-64	0.266892	0.096	0.059	1.393e-61	7	AQP3
0	0.19504	0.161	0.406	0	8	SMAP2
0	0.419542	0.933	0.996	0	8	B2M
3.58884e-268	0.216933	0.131	0.309	1.94156e-265	8	ERN1
4.01751e-260	0.173279	0.07	0.209	2.17348e-257	8	TIFA
3.3572e-251	0.260942	0.089	0.236	1.81625e-248	8	PELI1
5.20119e-247	0.316519	0.084	0.228	2.81384e-244	8	KARS
2.40192e-242	0.138582	0.113	0.269	1.29944e-239	8	BCL2
1.0447e-241	2.78127	0.087	0.032	5.65181e-239	8	ADH1B
1.03675e-231	0.118686	0.13	0.291	5.60879e-229	8	APOC1
3.62804e-227	0.246127	0.156	0.334	1.96277e-224	8	BASP1
1.61484e-212	0.278194	0.082	0.211	8.73628e-210	8	SH3YL1
6.35426e-212	0.123516	0.228	0.432	3.43766e-209	8	FCER1G
1.24589e-207	1.97258	0.226	0.145	6.74025e-205	8	SFRP4
8.68988e-202	3.07954	0.053	0.016	4.70122e-199	8	ADIPOQ
2.52458e-201	0.348921	0.151	0.315	1.3658e-198	8	GLIPR1
1.48988e-195	2.62057	0.07	0.026	8.06028e-193	8	ANKRD30A
2.21888e-166	0.399499	0.11	0.235	1.20041e-163	8	RTKN2
1.60724e-159	0.162776	0.054	0.146	8.69519e-157	8	LTB
5.15241e-156	0.334493	0.054	0.146	2.78745e-153	8	CDC14A
3.24671e-152	0.644592	0.075	0.177	1.75647e-149	8	SLC25A37
4.58018e-144	0.248029	0.211	0.374	2.47788e-141	8	FGL2
2.38232e-140	0.515147	0.082	0.182	1.28883e-137	8	MAP3K8
1.05806e-138	0.316928	0.082	0.18	5.72409e-136	8	CD86
2.30807e-133	3.12533	0.028	0.007	1.24867e-130	8	OPRPN
1.76678e-129	0.525924	0.098	0.201	9.55826e-127	8	RAB30
1.36675e-128	0.309559	0.173	0.31	7.3941e-126	8	C1QA
5.54411e-128	0.121719	0.098	0.197	2.99936e-125	8	CAV1
5.91516e-126	0.285874	0.268	0.451	3.2001e-123	8	CD68
1.33947e-123	2.90467	0.054	0.022	7.24651e-121	8	TAC1
2.11434e-119	0.536017	0.06	0.14	1.14386e-116	8	USP53
2.41117e-117	0.591831	0.066	0.148	1.30444e-114	8	STXBP4
5.47683e-117	0.23721	0.078	0.163	2.96296e-114	8	SLAMF1
2.08571e-114	0.295976	0.052	0.124	1.12837e-111	8	CD274
2.83379e-109	0.47172	0.054	0.126	1.53308e-106	8	CCNE1
4.07103e-109	0.415293	0.057	0.13	2.20243e-106	8	PDCD1LG2
1.10604e-103	0.467119	0.146	0.258	5.98368e-101	8	FCGR3A
1.27984e-102	0.560194	0.102	0.194	6.92394e-100	8	ZEB1
7.12601e-101	0.537563	0.05	0.117	3.85517e-98	8	LGALSL
8.56e-100	0.515671	0.23	0.384	4.63096e-97	8	AIF1
2.97063e-98	1.03147	0.431	0.418	1.60711e-95	8	LUM
4.72247e-98	0.341336	0.038	0.097	2.55485e-95	8	FSTL3
1.62002e-95	0.590615	0.098	0.185	8.76429e-93	8	ADAM12
1.929e-92	0.305829	0.041	0.1	1.04359e-89	8	SERHL2
3.7838e-92	0.257043	0.04	0.097	2.04704e-89	8	TCF7
1.17448e-90	0.313508	0.29	0.457	6.35392e-88	8	PTPRC
4.25735e-90	0.532841	0.068	0.138	2.30323e-87	8	ITGAM
8.07743e-90	0.791364	0.153	0.265	4.36989e-87	8	MYO5B
1.14911e-88	0.337734	0.103	0.185	6.21669e-86	8	SELL
1.01192e-87	0.587196	0.056	0.12	5.47449e-85	8	PDE4A
1.23078e-86	0.261581	0.043	0.099	6.65852e-84	8	C5orf46
1.38446e-83	0.193429	0.12	0.204	7.48994e-81	8	IL7R
4.84492e-83	2.73292	0.041	0.017	2.6211e-80	8	TIMP4
6.86659e-83	0.531513	0.28	0.453	3.71483e-80	8	ZEB2
5.11824e-81	0.307005	0.043	0.097	2.76897e-78	8	TUBB2B
7.72407e-80	0.348056	0.051	0.108	4.17872e-77	8	CD69
5.509e-79	0.367412	0.06	0.121	2.98037e-76	8	RHOH
1.18731e-73	2.53158	0.05	0.024	6.42336e-71	8	CLEC9A
6.52382e-72	0.416232	0.315	0.492	3.52939e-69	8	CD4
1.89093e-71	0.730989	0.111	0.191	1.02299e-68	8	CRISPLD2
2.60798e-68	0.638287	0.036	0.081	1.41092e-65	8	C2orf42
9.56076e-68	0.925821	0.162	0.266	5.17237e-65	8	FBLN1
5.64618e-67	0.382971	0.077	0.138	3.05458e-64	8	CCL8
1.11831e-66	0.818024	0.068	0.126	6.05006e-64	8	FAM49A
1.47083e-65	0.106814	0.031	0.073	7.95717e-63	8	CEACAM6
1.6737e-64	0.408864	0.049	0.098	9.05474e-62	8	TNF
1.92624e-64	0.978158	0.082	0.147	1.04209e-61	8	THAP2
1.46693e-63	0.610663	0.034	0.077	7.93609e-61	8	DMKN
1.95633e-62	2.47724	0.035	0.016	1.05838e-59	8	CAVIN2
5.32625e-62	0.119791	0.038	0.081	2.8815e-59	8	FOXP3
2.46435e-61	0.368277	0.037	0.079	1.33321e-58	8	IL3RA
1.16795e-60	2.62033	0.031	0.013	6.31863e-58	8	CEACAM8
3.01755e-60	0.72357	0.06	0.111	1.63249e-57	8	LPL
6.05328e-60	1.54179	0.312	0.307	3.27483e-57	8	CCDC80
1.34186e-56	0.53113	0.139	0.217	7.25949e-54	8	FAP
8.72225e-53	0.665716	0.06	0.108	4.71874e-50	8	C15orf48
9.59168e-53	0.685295	0.122	0.194	5.1891e-50	8	MRC1
2.92345e-52	0.392169	0.029	0.064	1.58158e-49	8	AQP3
2.49551e-50	0.441763	0.074	0.125	1.35007e-47	8	TIGIT
1.43542e-49	0.650974	0.05	0.093	7.7656e-47	8	GFPT2
4.74646e-49	1.23805	0.308	0.301	2.56784e-46	8	MMP2
4.19826e-47	0.278763	0.063	0.107	2.27126e-44	8	GZMB
3.81187e-45	2.58605	0.027	0.012	2.06222e-42	8	ABCC11
9.99145e-45	2.45409	0.045	0.025	5.40538e-42	8	CXCL5
4.99001e-41	0.514365	0.022	0.049	2.69959e-38	8	NDUFA4L2
8.84523e-41	0.294847	0.065	0.107	4.78527e-38	8	CTLA4
1.0615e-40	2.66017	0.038	0.02	5.74271e-38	8	TCEAL7
2.52023e-38	2.38565	0.035	0.019	1.36345e-35	8	DNAAF1
8.26629e-37	0.370531	0.059	0.096	4.47206e-34	8	KLRD1
1.57215e-36	0.499243	0.041	0.073	8.50534e-34	8	AR
1.65979e-35	2.61156	0.02	0.009	8.97946e-33	8	UCP1
4.43349e-30	0.854877	0.206	0.296	2.39852e-27	8	CD14
9.56909e-29	0.454101	0.009	0.025	5.17688e-26	8	UnassignedCodeword-0122
1.11048e-27	0.987692	0.058	0.091	6.00768e-25	8	ALDH1A3
3.13358e-27	1.78658	0.048	0.032	1.69527e-24	8	MMP12
6.21945e-26	1.69829	0.109	0.088	3.36472e-23	8	IGF1
2.37833e-25	1.17768	0.134	0.19	1.28668e-22	8	MNDA
6.62257e-24	0.783818	0.03	0.052	3.58281e-21	8	IL2RA
1.23116e-22	0.926713	0.073	0.105	6.66057e-20	8	LRRC15
1.7902e-21	0.604598	0.025	0.043	9.68498e-19	8	CD80
1.46588e-19	1.84136	0.033	0.021	7.93043e-17	8	FCER1A
6.031e-19	0.86052	0.147	0.198	3.26277e-16	8	PDGFRA
1.02519e-18	1.17193	0.048	0.071	5.54627e-16	8	APOBEC3A
5.04121e-16	1.32157	0.052	0.038	2.7273e-13	8	TCL1A
7.17702e-16	2.21531	0.012	0.006	3.88277e-13	8	LRG1
3.14848e-15	1.73428	0.059	0.045	1.70333e-12	8	ESR1
7.21592e-15	1.12521	0.048	0.069	3.90381e-12	8	HK3
1.91438e-14	1.07376	0.026	0.041	1.03568e-11	8	SNAI1
1.84664e-13	1.78561	0.043	0.031	9.99032e-11	8	PGR
4.01519e-13	1.65029	0.038	0.028	2.17222e-10	8	AVPR1A
1.25784e-12	0.656804	0.023	0.036	6.8049e-10	8	ANGPT2
1.34779e-12	1.32732	0.075	0.101	7.29157e-10	8	CDC14B
2.85661e-12	0.74147	0.075	0.098	1.54543e-09	8	KLRB1
4.95168e-12	0.320292	0.457	0.587	2.67886e-09	8	LYZ
1.78057e-11	1.15611	0.057	0.076	9.63286e-09	8	HOXD8
1.23846e-10	1.53573	0.168	0.165	6.70006e-08	8	ITGAX
3.17894e-10	2.08169	0.024	0.017	1.71981e-07	8	CCNA1
4.41654e-08	2.21661	0.061	0.053	2.38935e-05	8	S100A8
3.96856e-07	1.25565	0.035	0.028	0.000214699	8	LILRA4
5.49381e-07	1.91382	0.068	0.06	0.000297215	8	KLRF1
1.15945e-06	0.995269	0.101	0.123	0.000627262	8	PTGDS
2.42995e-06	1.09906	0.064	0.079	0.0013146	8	PTN
2.60286e-06	1.22824	0.022	0.029	0.00140815	8	RORC
2.84877e-06	1.63091	0.054	0.046	0.00154118	8	IL6
9.63848e-06	1.05461	0.029	0.037	0.00521442	8	RAPGEF3
0.00117462	1.7553	0.05	0.045	0.635468	8	CLIC6
0.00142112	1.1874	0.046	0.054	0.768825	8	CLECL1
0.00149009	1.40637	0.07	0.082	0.806139	8	DCLK1
0.00285355	0.761386	0.032	0.028	1	8	PIGR
0.00330211	1.41805	0.037	0.043	1	8	OXTR
0.00574865	1.59985	0.048	0.044	1	8	ANKRD29
0	5.17279	0.711	0.065	0	9	VWF
0	4.36274	0.703	0.072	0	9	CD93
0	5.46507	0.609	0.028	0	9	CLEC14A
0	3.18296	0.712	0.158	0	9	CAV1
0	4.73362	0.595	0.045	0	9	RAMP2
0	5.47243	0.555	0.021	0	9	KDR
0	2.47999	0.819	0.299	0	9	PECAM1
0	3.48861	0.72	0.203	0	9	AQP1
0	5.28949	0.491	0.022	0	9	MMRN2
0	2.52899	0.544	0.166	0	9	PDGFRB
0	1.72197	0.635	0.274	0	9	MYLK
0	1.86904	0.514	0.168	0	9	ZEB1
0	1.67872	0.581	0.242	0	9	TCF4
0	1.52668	0.586	0.256	0	9	TMEM173
0	1.37148	0.454	0.135	0	9	TCIM
0	4.64191	0.318	0.017	0	9	ANGPT2
0	1.06731	0.716	0.425	0	9	ZEB2
0	2.7311	0.343	0.06	0	9	IL3RA
0	0.812702	0.607	0.34	0	9	COL6A3
0	3.51381	0.299	0.036	0	9	NOSTRIN
0	5.87267	0.258	0.007	0	9	EGFL7
0	2.70094	0.301	0.06	0	9	HOXD8
0	0.96233	0.549	0.312	0	9	TGFB1
0	1.03405	0.627	0.394	0	9	CXCL12
0	1.24223	0.735	0.505	0	9	WARS
0	1.11183	0.637	0.415	0	9	CXCL9
0	0.861028	0.596	0.376	0	9	CCND1
0	5.02081	0.227	0.008	0	9	SOX18
0	1.28484	0.658	0.444	0	9	ACTA2
0	1.07863	0.506	0.292	0	9	SVIL
0	4.11237	0.22	0.016	0	9	AVPR1A
0	0.767966	0.422	0.236	0	9	SERPINB9
0	3.04132	0.237	0.054	0	9	STC1
0	2.90204	0.203	0.028	0	9	SOX17
0	1.23543	0.345	0.176	0	9	CRISPLD2
0	0.663095	0.528	0.361	0	9	DST
0	0.716377	0.756	0.594	0	9	HIF1A
0	0.553485	0.758	0.6	0	9	PTEN
0	1.88868	0.255	0.099	0	9	LPL
0	0.588394	0.535	0.384	0	9	RB1
0	1.49247	0.239	0.092	0	9	PPARG
0	1.56072	0.217	0.073	0	9	DCLK1
0	3.92747	0.157	0.015	0	9	ESM1
0	2.82986	0.165	0.028	0	9	RAPGEF3
0	1.47682	0.195	0.063	0	9	PDK4
0	2.88295	0.151	0.03	0	9	HOXD9
0	2.41771	0.154	0.037	0	9	ANKRD29
0	2.15292	0.137	0.034	0	9	SNAI1
0	2.48976	0.085	0.013	0	9	CAVIN2
1.21353e-275	0.576735	0.543	0.408	6.56519e-273	9	STAT3
8.06073e-273	1.73565	0.076	0.024	4.36085e-270	9	MYH11
3.35317e-263	0.484219	0.343	0.204	1.81406e-260	9	FAP
7.05358e-258	0.159685	0.999	0.992	3.81599e-255	9	B2M
5.71074e-254	1.52091	0.109	0.043	3.08951e-251	9	NDUFA4L2
1.575e-242	0.451086	0.575	0.426	8.52076e-240	9	CTTN
6.03105e-212	0.519804	0.452	0.317	3.2628e-209	9	POSTN
7.15428e-197	0.78107	0.176	0.094	3.87047e-194	9	CDC14B
9.6656e-186	1.45072	0.075	0.029	5.22909e-183	9	AKR1C3
9.66176e-173	0.378111	0.497	0.374	5.22701e-170	9	CCPG1
1.195e-169	0.693791	0.143	0.074	6.46496e-167	9	PTN
2.52457e-161	1.00117	0.158	0.087	1.36579e-158	9	DAPK3
9.3816e-157	0.523234	0.482	0.38	5.07544e-154	9	CDKN1A
1.76556e-135	0.638211	0.209	0.13	9.55166e-133	9	CCL8
1.79845e-111	0.142316	0.352	0.247	9.72963e-109	9	PRDM1
2.93205e-87	0.53794	0.297	0.226	1.58624e-84	9	BACE2
1.63996e-81	0.434141	0.243	0.176	8.87217e-79	9	ADAM12
6.34005e-79	0.268673	0.192	0.13	3.42997e-76	9	DUSP5
1.80914e-69	0.392015	0.267	0.202	9.78743e-67	9	IDO1
4.44302e-69	0.817158	0.077	0.043	2.40367e-66	9	GNLY
3.99333e-65	0.178742	0.653	0.581	2.16039e-62	9	MAPK1
1.18697e-44	0.263313	0.17	0.125	6.42151e-42	9	PRF1
2.85916e-31	0.110282	0.637	0.585	1.54681e-28	9	TOMM7
7.48147e-25	0.278948	0.048	0.031	4.04747e-22	9	PGR
1.18155e-24	0.227164	0.261	0.225	6.39219e-22	9	PELI1
1.28271e-23	0.239299	0.169	0.138	6.93945e-21	9	CDC14A
4.81908e-23	0.186993	0.252	0.217	2.60712e-20	9	KARS
2.30939e-18	0.212492	0.032	0.021	1.24938e-15	9	TCEAL7
6.34227e-18	0.325609	0.221	0.195	3.43117e-15	9	JUP
8.48025e-18	0.407795	0.125	0.102	4.58782e-15	9	CDC42EP1
3.726e-16	0.109797	0.174	0.146	2.01577e-13	9	NKG7
7.90883e-16	0.205251	0.138	0.115	4.27868e-13	9	PDE4A
1.04999e-13	0.127961	0.474	0.43	5.68047e-11	9	FLNB
1.05572e-13	0.504799	0.045	0.033	5.71145e-11	9	FOXC2
1.90889e-12	0.437249	0.13	0.112	1.03271e-09	9	LGALSL
2.22907e-12	0.106756	0.386	0.36	1.20593e-09	9	QARS
1.01656e-11	0.226157	0.239	0.218	5.49961e-09	9	FOXC1
3.48241e-11	0.102965	0.142	0.122	1.88398e-08	9	FAM49A
2.86466e-06	0.270754	0.01	0.006	0.00154978	9	LRG1
9.8083e-06	0.318901	0.054	0.046	0.00530629	9	IL6
8.15959e-05	0.154128	0.046	0.039	0.0441434	9	CX3CR1
0	5.20784	0.752	0.048	0	10	MS4A1
0	4.85551	0.693	0.057	0	10	BANK1
0	2.57431	0.593	0.156	0	10	SELL
0	1.34435	0.773	0.428	0	10	PTPRC
0	4.20514	0.361	0.033	0	10	CD19
0	2.49939	0.415	0.1	0	10	CD79A
0	2.15185	0.412	0.125	0	10	LTB
0	3.43871	0.3	0.046	0	10	CD79B
0	0.86771	0.58	0.356	0	10	TRAC
0	1.68264	0.395	0.175	0	10	GPR183
0	2.1827	0.328	0.11	0	10	PTGDS
0	1.24738	0.442	0.225	0	10	CYTIP
0	1.24609	0.555	0.361	0	10	CXCR4
0	1.1963	0.628	0.438	0	10	ATM
0	3.73525	0.218	0.029	0	10	TCL1A
0	0.924871	0.527	0.343	0	10	IL2RG
0	1.26298	0.429	0.25	0	10	BCL2
0	1.90713	0.245	0.07	0	10	CCR7
0	1.14635	0.488	0.314	0	10	BASP1
0	1.11407	0.291	0.12	0	10	SPIB
0	1.69855	0.263	0.109	0	10	RHOH
0	1.12875	0.435	0.281	0	10	LPXN
0	1.08396	0.444	0.297	0	10	GLIPR1
0	0.971542	0.338	0.191	0	10	IL7R
0	3.78264	0.162	0.021	0	10	LILRA4
0	1.11543	0.507	0.384	0	10	SMAP2
0	2.29291	0.167	0.047	0	10	CLECL1
0	2.88043	0.136	0.026	0	10	PLD4
0	0.936188	0.567	0.46	0	10	FAM107B
0	1.79228	0.135	0.049	0	10	LY86
0	0.451763	0.998	0.992	0	10	B2M
6.72965e-289	0.649425	0.569	0.436	3.64074e-286	10	ZEB2
4.1486e-261	0.874329	0.438	0.32	2.24439e-258	10	TGFB1
8.50388e-231	0.64257	0.58	0.475	4.6006e-228	10	CD4
5.32913e-227	0.985196	0.364	0.257	2.88306e-224	10	TCF4
6.94469e-190	0.831966	0.346	0.242	3.75708e-187	10	SERPINB9
6.69581e-189	1.25975	0.168	0.089	3.62243e-186	10	TCF7
1.43451e-181	0.56084	0.425	0.305	7.76068e-179	10	CD3E
2.70577e-159	0.967963	0.21	0.127	1.46382e-156	10	CD27
6.71607e-148	1.39855	0.171	0.1	3.63339e-145	10	GZMB
1.26677e-142	0.905394	0.236	0.154	6.85325e-140	10	SLAMF1
3.18546e-141	0.769009	0.387	0.302	1.72334e-138	10	CCDC80
5.03014e-137	0.76225	0.446	0.39	2.72131e-134	10	RB1
1.43819e-122	0.825772	0.247	0.17	7.78061e-120	10	CD86
3.08015e-115	1.24706	0.074	0.033	1.66636e-112	10	ADH1B
2.1441e-112	1.15179	0.183	0.12	1.15996e-109	10	FAM49A
4.24306e-108	1.13654	0.15	0.092	2.29549e-105	10	TNF
7.77908e-95	0.998164	0.158	0.102	4.20848e-92	10	CD69
3.04977e-93	1.27043	0.079	0.04	1.64993e-90	10	CD80
3.50009e-90	0.786189	0.291	0.228	1.89355e-87	10	CD83
6.73389e-79	0.481183	0.219	0.154	3.64303e-76	10	CCR2
7.37917e-78	0.124155	0.506	0.414	3.99213e-75	10	LUM
2.20089e-76	0.370406	0.565	0.547	1.19068e-73	10	CD47
8.30448e-76	0.198756	0.644	0.575	4.49272e-73	10	LYZ
3.25352e-74	0.94483	0.134	0.087	1.76016e-71	10	IGF1
1.83558e-72	0.776875	0.143	0.094	9.93049e-70	10	KLRB1
2.46406e-68	0.400032	0.455	0.405	1.33306e-65	10	CXCL12
1.88689e-60	0.352665	0.61	0.61	1.02081e-57	10	PTEN
2.18987e-55	0.527984	0.225	0.171	1.18472e-52	10	CD247
8.17715e-51	0.191655	0.503	0.473	4.42384e-48	10	ITM2C
1.75305e-48	1.31994	0.109	0.075	9.48399e-46	10	IL3RA
6.68244e-46	0.267552	0.414	0.361	3.6152e-43	10	FGL2
1.56033e-43	0.242959	0.32	0.265	8.44141e-41	10	CCL5
6.27802e-42	0.265696	0.193	0.147	3.39641e-39	10	SFRP4
1.38122e-41	0.690779	0.183	0.143	7.47243e-39	10	DPT
5.52354e-39	0.417969	0.467	0.462	2.98824e-36	10	VOPP1
5.66329e-39	0.161149	0.302	0.251	3.06384e-36	10	CD8A
4.76751e-37	1.2327	0.021	0.009	2.57922e-34	10	GZMK
7.8028e-36	0.724729	0.091	0.062	4.22131e-33	10	TNFRSF17
6.57018e-29	0.365859	0.555	0.59	3.55447e-26	10	TOMM7
2.33803e-26	0.17935	0.142	0.196	1.26487e-23	10	TRAF4
4.99764e-26	0.471671	0.151	0.12	2.70372e-23	10	TIGIT
1.22758e-25	0.266647	0.319	0.285	6.6412e-23	10	CD163
9.3548e-25	0.418315	0.216	0.185	5.06095e-22	10	MNDA
4.32091e-24	0.804282	0.065	0.045	2.33761e-21	10	IL6
6.10893e-21	0.765573	0.091	0.07	3.30493e-18	10	PDK4
4.93066e-20	0.364286	0.199	0.169	2.66749e-17	10	CD3G
5.86296e-19	0.578376	0.156	0.132	3.17186e-16	10	ITGAM
7.05864e-18	0.165392	0.238	0.302	3.81872e-15	10	ERN1
3.73888e-17	0.353863	0.19	0.164	2.02273e-14	10	ITGAX
5.67199e-16	0.212935	0.11	0.145	3.06855e-13	10	THAP2
5.96321e-14	0.770411	0.032	0.021	3.2261e-11	10	FCER1A
7.63935e-13	0.610197	0.064	0.05	4.13289e-10	10	IL2RA
1.33875e-12	0.141355	0.059	0.08	7.24263e-10	10	C2orf42
5.99308e-11	0.605756	0.154	0.139	3.24226e-08	10	CDC14A
9.19074e-11	0.176935	0.386	0.374	4.97219e-08	10	AIF1
5.44264e-08	0.21114	0.174	0.209	2.94447e-05	10	APOBEC3B
1.32133e-07	0.582163	0.025	0.018	7.14839e-05	10	ADIPOQ
3.34308e-06	0.562247	0.048	0.039	0.0018086	10	CX3CR1
7.98199e-05	0.538527	0.179	0.176	0.0431826	10	MAP3K8
0.000109846	0.102238	0.052	0.062	0.0594268	10	AQP3
0.000189559	0.29679	0.195	0.188	0.102552	10	ZEB1
0.0036095	0.25495	0.026	0.032	1	10	AKR1C3
0.00455234	0.345887	0.088	0.1	1	10	CDC14B
0.00696391	0.296946	0.025	0.03	1	10	CTH
0	7.64868	0.627	0.014	0	11	CPA3
0	8.52843	0.421	0.005	0	11	TPSAB1
0	7.16073	0.288	0.007	0	11	CTSG
8.64096e-251	0.314994	0.971	0.993	4.67476e-248	11	B2M
9.90208e-200	1.46055	0.205	0.083	5.35702e-197	11	MS4A1
1.21095e-103	1.31208	0.176	0.089	6.55124e-101	11	BANK1
1.90553e-86	0.591779	0.549	0.444	1.03089e-83	11	PTPRC
8.26066e-86	1.01467	0.235	0.141	4.46902e-83	11	MZB1
2.6857e-78	0.993983	0.2	0.115	1.45296e-75	11	CD79A
1.91052e-75	0.971022	0.237	0.148	1.03359e-72	11	SFRP4
1.0893e-71	1.29196	0.106	0.049	5.89309e-69	11	CD19
3.83993e-71	1.17474	0.159	0.088	2.0774e-68	11	IGF1
1.5342e-57	0.494304	0.511	0.416	8.30002e-55	11	LUM
6.19662e-56	1.59491	0.076	0.035	3.35237e-53	11	ADH1B
5.59898e-54	2.33808	0.175	0.116	3.02905e-51	11	KIT
1.13116e-52	0.72	0.314	0.235	6.11957e-50	11	CYTIP
8.77109e-51	0.790478	0.375	0.305	4.74516e-48	11	CCDC80
3.86207e-48	0.513144	0.503	0.441	2.08938e-45	11	ZEB2
6.0334e-46	0.945982	0.178	0.116	3.26407e-43	11	RHOH
4.39125e-45	0.758554	0.248	0.178	2.37567e-42	11	SELL
1.11895e-42	0.607628	0.373	0.299	6.05351e-40	11	MMP2
3.30844e-39	0.597665	0.456	0.407	1.78986e-36	11	CXCL12
8.26984e-37	0.759266	0.178	0.121	4.47398e-34	11	PTGDS
1.67859e-36	1.05017	0.101	0.059	9.08117e-34	11	CD79B
5.28194e-36	0.132196	0.16	0.261	2.85753e-33	11	MYO5B
9.12985e-36	0.680681	0.261	0.198	4.93925e-33	11	IL7R
1.07905e-33	0.616989	0.344	0.285	5.83766e-31	11	CD163
1.10903e-33	1.6029	0.039	0.016	5.99984e-31	11	CAVIN2
3.42743e-33	1.41207	0.091	0.053	1.85424e-30	11	CLECL1
6.5501e-33	0.310435	0.629	0.578	3.54361e-30	11	LYZ
5.44767e-29	0.382489	0.52	0.48	2.94719e-26	11	CD4
2.74678e-28	0.54951	0.462	0.448	1.48601e-25	11	ATM
4.41989e-28	1.21843	0.069	0.038	2.39116e-25	11	TCL1A
4.54045e-28	0.720252	0.215	0.164	2.45638e-25	11	ITGAX
2.05623e-27	0.173034	0.06	0.115	1.11242e-24	11	LGALSL
1.37842e-22	1.84956	0.045	0.024	7.45724e-20	11	TAC1
1.92616e-21	1.52164	0.05	0.028	1.04205e-18	11	ANKRD30A
2.43051e-21	0.4188	0.411	0.367	1.31491e-18	11	TRAC
2.09773e-20	0.684177	0.114	0.078	1.13487e-17	11	CCR7
7.65371e-20	1.38181	0.041	0.021	4.14066e-17	11	FCER1A
8.83821e-20	0.691002	0.185	0.144	4.78147e-17	11	DPT
1.60628e-18	0.322789	0.092	0.144	8.68996e-16	11	STXBP4
2.17034e-18	0.840672	0.093	0.063	1.17416e-15	11	TNFRSF17
6.1969e-18	1.08971	0.08	0.053	3.35252e-15	11	LY86
1.17037e-17	0.655508	0.168	0.131	6.33172e-15	11	CD27
3.40414e-17	0.524957	0.32	0.289	1.84164e-14	11	LPXN
9.52966e-17	0.554023	0.196	0.157	5.15555e-14	11	CCR2
1.45419e-16	0.605228	0.222	0.186	7.86715e-14	11	GPR183
2.10275e-16	0.438436	0.354	0.322	1.13759e-13	11	BASP1
5.34666e-16	0.192715	0.09	0.136	2.89254e-13	11	USP53
1.94622e-15	0.129001	0.143	0.202	1.05291e-12	11	TIFA
8.40729e-15	1.64707	0.019	0.008	4.54835e-12	11	OPRPN
5.43835e-13	1.95332	0.019	0.009	2.94215e-10	11	UCP1
6.14276e-13	1.04733	0.067	0.046	3.32324e-10	11	ESR1
1.06022e-12	1.67101	0.026	0.014	5.73578e-10	11	CEACAM8
1.79389e-12	0.513043	0.323	0.304	9.70494e-10	11	GLIPR1
3.10789e-12	0.556678	0.188	0.157	1.68137e-09	11	SLAMF1
1.30772e-11	0.502416	0.204	0.174	7.07476e-09	11	CD247
1.5751e-11	1.18612	0.019	0.009	8.52131e-09	11	GZMK
2.12815e-11	0.229836	0.392	0.355	1.15133e-08	11	COL6A3
4.46616e-11	0.866765	0.093	0.07	2.41619e-08	11	PDK4
6.94239e-11	0.501012	0.218	0.189	3.75583e-08	11	MRC1
1.38066e-09	0.776227	0.127	0.104	7.46937e-07	11	CD69
1.76644e-09	1.36535	0.04	0.026	9.55643e-07	11	CXCL5
7.75693e-09	0.198312	0.355	0.33	4.1965e-06	11	PECAM1
1.6579e-08	0.200604	0.168	0.217	8.96923e-06	11	TRIB1
1.74126e-08	0.867204	0.041	0.028	9.4202e-06	11	LILRA4
2.14068e-08	0.305876	0.333	0.311	1.15811e-05	11	CD3E
2.15289e-08	0.651063	0.117	0.096	1.16472e-05	11	KLRB1
2.92103e-08	0.381697	0.309	0.29	1.58028e-05	11	CD14
3.10881e-08	1.56806	0.029	0.019	1.68186e-05	11	TIMP4
3.32198e-08	1.00492	0.062	0.046	1.79719e-05	11	IL6
3.37174e-08	0.570279	0.162	0.14	1.82411e-05	11	LTB
5.59179e-08	0.222942	0.383	0.364	3.02516e-05	11	FGL2
6.06988e-08	0.187601	0.032	0.05	3.28381e-05	11	MYBPC1
8.49312e-08	0.446508	0.271	0.253	4.59478e-05	11	PRDM1
1.30368e-07	1.27076	0.028	0.018	7.05293e-05	11	ADIPOQ
2.62749e-07	0.76443	0.111	0.093	0.000142147	11	TCF7
3.43981e-07	0.242331	0.447	0.44	0.000186094	11	CD68
4.84678e-07	0.177895	0.319	0.395	0.000262211	11	RB1
1.19394e-06	1.43452	0.036	0.025	0.000645924	11	CLEC9A
1.3739e-06	0.266374	0.424	0.42	0.000743279	11	FCER1G
2.32654e-06	0.653929	0.11	0.144	0.00125866	11	THAP2
3.02939e-06	0.542419	0.139	0.121	0.0016389	11	TIGIT
3.76592e-06	0.392304	0.447	0.475	0.00203736	11	ITM2C
5.26784e-06	0.109018	0.23	0.277	0.0028499	11	TMEM173
6.15569e-06	0.30558	0.38	0.374	0.00333023	11	AIF1
6.36866e-06	0.35932	0.332	0.326	0.00344544	11	TGFB1
9.67099e-06	0.503867	0.209	0.195	0.005232	11	PDGFRA
1.29797e-05	0.384976	0.059	0.079	0.00702199	11	C2orf42
1.33548e-05	0.179572	0.074	0.096	0.00722497	11	DUSP2
1.95976e-05	0.455659	0.189	0.174	0.0106023	11	CD86
3.83763e-05	0.595062	0.147	0.133	0.0207616	11	ITGAM
4.79199e-05	1.09617	0.03	0.021	0.0259247	11	TCEAL7
8.40953e-05	0.437516	0.028	0.04	0.0454956	11	SNAI1
0.000116691	0.279823	0.145	0.177	0.0631297	11	MAP3K8
0.000134315	0.368477	0.053	0.07	0.0726645	11	APOBEC3A
0.000167237	1.29128	0.011	0.006	0.0904754	11	LRG1
0.000178954	0.537753	0.117	0.103	0.096814	11	LRRC15
0.000364778	0.841292	0.041	0.032	0.197345	11	PGR
0.000380741	0.429621	0.264	0.26	0.205981	11	BCL2
0.000439321	0.636936	0.039	0.052	0.237673	11	NOSTRIN
0.000460941	0.23724	0.357	0.347	0.249369	11	SLAMF7
0.000465244	0.331685	0.041	0.053	0.251697	11	S100A8
0.000482862	0.84691	0.101	0.091	0.261229	11	KLRC1
0.000550535	0.375844	0.216	0.261	0.297839	11	FBLN1
0.000644281	0.175965	0.101	0.12	0.348556	11	CD274
0.000740206	0.370751	0.223	0.212	0.400451	11	FAP
0.000804972	0.125722	0.39	0.464	0.43549	11	VOPP1
0.000879444	0.775257	0.092	0.081	0.475779	11	DCLK1
0.00093713	0.656182	0.025	0.034	0.506987	11	FOXC2
0.000946641	0.372556	0.182	0.171	0.512133	11	CD3G
0.00121481	0.839304	0.04	0.032	0.65721	11	PLD4
0.00133962	0.471664	0.115	0.104	0.724733	11	CTLA4
0.00153144	0.762292	0.033	0.043	0.828509	11	OXTR
0.00173509	0.619754	0.061	0.075	0.938683	11	HOXD8
0.00208867	0.171104	0.395	0.468	1	11	FAM107B
0.00218438	0.673347	0.029	0.038	1	11	HOXD9
0.00241577	0.67081	0.023	0.031	1	11	AGR3
0.00242678	0.519468	0.287	0.299	1	11	ERN1
0.00300362	0.424741	0.341	0.351	1	11	TENT5C
0.00320528	0.703218	0.087	0.078	1	11	PTN
0.0035461	0.74733	0.05	0.042	1	11	CD80
0.00389236	0.448291	0.193	0.186	1	11	MNDA
0.0039613	0.64879	0.022	0.029	1	11	RORC
0.00491802	0.73741	0.107	0.099	1	11	CDC14B
0.00735328	1.37768	0.022	0.017	1	11	CCNA1
0.00798266	0.91526	0.036	0.03	1	11	CTH
0.00949922	0.10159	0.376	0.435	1	11	S100A4
0	6.32715	0.607	0.017	0	12	MYH11
0	4.7327	0.686	0.11	0	12	KRT14
0	3.0578	0.718	0.288	0	12	MYLK
0	1.85446	0.606	0.206	0	12	KRT5
0	1.68829	0.673	0.274	0	12	SFRP1
0	3.08014	0.758	0.364	0	12	DST
0	1.42817	0.73	0.338	0	12	TACSTD2
0	2.01154	0.469	0.12	0	12	SERPINA3
0	2.36707	0.794	0.451	0	12	ACTA2
0	2.86497	0.504	0.197	0	12	GATA3
0	6.0646	0.326	0.023	0	12	PIGR
0	3.76728	0.231	0.029	0	12	PGR
0	4.07165	0.217	0.025	0	12	ANKRD30A
0	2.40089	0.244	0.075	0	12	PTN
2.10837e-247	2.88838	0.161	0.044	1.14063e-244	12	ESR1
1.23447e-224	2.67645	0.161	0.047	6.67847e-222	12	MYBPC1
1.37585e-203	2.75439	0.261	0.115	7.44337e-201	12	KIT
8.44209e-167	1.09424	0.652	0.577	4.56717e-164	12	RUNX1
7.05635e-150	0.869802	0.582	0.407	3.81748e-147	12	DSP
3.78569e-142	2.33372	0.231	0.11	2.04806e-139	12	MLPH
5.54508e-135	1.44003	0.369	0.228	2.99989e-132	12	EGFR
1.90189e-131	0.373328	0.703	0.473	1.02892e-128	12	KRT7
4.73483e-129	1.1903	0.463	0.329	2.56154e-126	12	ERBB2
3.96276e-110	1.67277	0.164	0.069	2.14385e-107	12	PDK4
1.64392e-101	2.43983	0.113	0.042	8.89358e-99	12	OXTR
7.17598e-99	1.92942	0.107	0.039	3.8822e-96	12	CX3CR1
7.63083e-98	0.840679	0.459	0.326	4.12828e-95	12	CDH1
4.21013e-97	1.85221	0.209	0.108	2.27768e-94	12	FOXA1
4.32143e-96	1.23754	0.228	0.118	2.3379e-93	12	KRT23
4.47332e-83	2.58614	0.039	0.008	2.42007e-80	12	OPRPN
8.39583e-78	2.02546	0.08	0.028	4.54214e-75	12	RORC
1.55597e-59	0.838413	0.358	0.258	8.41781e-57	12	BCL2
4.01466e-55	0.913303	0.388	0.304	2.17193e-52	12	SVIL
2.62776e-54	1.64413	0.134	0.07	1.42162e-51	12	AR
2.37082e-42	0.585377	0.586	0.588	1.28262e-39	12	TOMM7
6.74086e-40	1.0897	0.357	0.303	3.6468e-37	12	ACTG2
2.97817e-39	1.10879	0.224	0.156	1.61119e-36	12	TFAP2A
6.95314e-37	1.18608	0.196	0.134	3.76165e-34	12	USP53
3.5581e-31	1.05241	0.252	0.196	1.92493e-28	12	JUP
7.98634e-31	0.710061	0.446	0.416	4.32061e-28	12	STAT3
5.71245e-28	1.02202	0.149	0.098	3.09044e-25	12	CDC14B
3.91932e-25	1.52724	0.064	0.033	2.12035e-22	12	FOXC2
4.94947e-24	0.53066	0.436	0.389	2.67767e-21	12	CCND1
3.13845e-23	0.954259	0.138	0.093	1.6979e-20	12	TUBB2B
1.61984e-21	1.28556	0.037	0.017	8.76335e-19	12	CAVIN2
4.414e-20	1.0739	0.075	0.044	2.38797e-17	12	ANKRD29
4.23426e-19	1.02124	0.12	0.081	2.29074e-16	12	DCLK1
1.03641e-18	1.30752	0.108	0.073	5.60697e-16	12	DMKN
2.16678e-18	1.0669	0.083	0.051	1.17223e-15	12	NOSTRIN
6.12811e-18	0.482897	0.461	0.432	3.31531e-15	12	FLNB
5.3127e-17	0.32817	0.207	0.154	2.87417e-14	12	TCIM
1.2617e-15	1.18802	0.038	0.019	6.82579e-13	12	DNAAF1
2.95382e-15	0.632049	0.128	0.091	1.59801e-12	12	KRT6B
6.89367e-12	1.10367	0.038	0.021	3.72948e-09	12	TCEAL7
4.96479e-10	0.482499	0.222	0.19	2.68595e-07	12	CAV1
1.45777e-08	0.488578	0.428	0.447	7.88655e-06	12	CREBBP
1.68696e-08	0.984457	0.046	0.03	9.12643e-06	12	AGR3
3.18665e-08	0.23754	0.583	0.61	1.72398e-05	12	PTEN
5.04884e-08	1.1478	0.066	0.048	2.73142e-05	12	MUC6
6.34559e-08	0.184642	0.21	0.272	3.43296e-05	12	SLC5A6
1.63795e-07	0.841877	0.045	0.03	8.8613e-05	12	CTH
4.74106e-07	0.619651	0.223	0.203	0.000256491	12	SH3YL1
7.417e-07	0.228628	0.108	0.144	0.00040126	12	STXBP4
1.16215e-06	1.20359	0.013	0.006	0.000628726	12	LRG1
1.81803e-06	0.373915	0.134	0.11	0.000983552	12	SLPI
2.02488e-06	0.23632	0.171	0.22	0.00109546	12	FOXC1
4.61459e-06	1.22613	0.022	0.013	0.00249649	12	ABCC11
3.14206e-05	0.154723	0.214	0.259	0.0169986	12	MYO5B
0.000537729	0.623673	0.036	0.027	0.290911	12	CXCL5
0.000771894	0.437767	0.378	0.403	0.417595	12	LARS
0.00367157	0.880887	0.023	0.017	1	12	CCNA1
0.00508155	0.309333	0.073	0.089	1	12	ALDH1A3
0.00758944	0.853078	0.039	0.031	1	12	AKR1C3
0	1.81084	0.896	0.209	0	13	KRT5
0	1.47434	0.907	0.277	0	13	SFRP1
0	1.49513	0.901	0.387	0	13	CCND1
0	1.17942	0.997	0.65	0	13	CD24
2.70687e-299	1.13664	0.837	0.308	1.46442e-296	13	CD3E
1.13778e-289	1.1392	0.89	0.365	6.1554e-287	13	TRAC
4.05293e-265	1.25882	0.577	0.169	2.19263e-262	13	CD3G
4.28633e-242	0.836886	0.996	0.827	2.31891e-239	13	PKM
9.23394e-220	1.07475	0.552	0.172	4.99556e-217	13	CD247
5.90312e-218	2.27095	0.256	0.052	3.19359e-215	13	S100A8
5.88108e-196	1.43523	0.368	0.099	3.18166e-193	13	CXCR6
1.56677e-168	1.12966	0.68	0.309	8.47623e-166	13	TUBA4A
2.25545e-159	1.24896	0.559	0.229	1.2202e-156	13	BACE2
1.9861e-153	1.14862	0.384	0.12	1.07448e-150	13	TIGIT
3.36534e-143	0.539415	0.932	0.474	1.82065e-140	13	KRT7
2.00477e-142	0.944988	0.536	0.212	1.08458e-139	13	GZMA
9.81857e-141	1.16176	0.564	0.247	5.31185e-138	13	CXCL16
2.5874e-132	0.606234	0.963	0.514	1.39978e-129	13	EPCAM
1.69299e-128	1.30266	0.539	0.252	9.15906e-126	13	CD8A
1.23796e-120	0.188345	0.747	0.342	6.69736e-118	13	TACSTD2
1.36371e-115	0.802728	0.585	0.266	7.37768e-113	13	CCL5
9.22892e-112	0.488911	0.844	0.445	4.99285e-109	13	PTPRC
1.52535e-109	0.982886	0.529	0.245	8.25212e-107	13	CDC20
1.54547e-107	0.561923	0.858	0.496	8.36099e-105	13	LDHB
4.70301e-106	0.740784	0.849	0.521	2.54433e-103	13	SMS
6.43323e-103	1.53707	0.443	0.204	3.48038e-100	13	IDO1
6.65693e-100	0.704754	0.815	0.478	3.6014e-97	13	ENAH
1.08775e-94	1.50108	0.189	0.052	5.88475e-92	13	IFNG
5.58e-88	0.967531	0.286	0.103	3.01878e-85	13	CTLA4
3.60195e-87	1.30315	0.268	0.096	1.94865e-84	13	KLRB1
1.70618e-86	0.554305	0.68	0.351	9.23044e-84	13	IL2RG
5.99467e-79	0.814096	0.771	0.518	3.24312e-76	13	WARS
1.14313e-77	1.24454	0.271	0.103	6.18431e-75	13	GZMB
1.6444e-76	1.94127	0.088	0.017	8.89621e-74	13	PDCD1
1.5053e-75	0.743989	0.543	0.285	8.14367e-73	13	TOP2A
7.00414e-75	0.704009	0.367	0.157	3.78924e-72	13	SLAMF1
1.96006e-72	0.698874	0.564	0.303	1.06039e-69	13	CCNB1
5.42092e-70	0.619688	0.344	0.146	2.93272e-67	13	NKG7
1.07493e-68	0.870644	0.446	0.229	5.81536e-66	13	OCIAD2
1.18074e-65	0.770562	0.423	0.211	6.38778e-63	13	CENPF
1.79158e-63	0.746567	0.465	0.244	9.69247e-61	13	FASN
1.13507e-62	0.55796	0.693	0.432	6.14074e-60	13	S100A4
4.04962e-61	0.471789	0.541	0.288	2.19084e-58	13	LPXN
2.42478e-57	0.499845	0.265	0.11	1.31181e-54	13	SLPI
9.96025e-50	0.701327	0.409	0.224	5.38849e-47	13	ANKRD28
1.25313e-49	0.403533	0.285	0.127	6.77943e-47	13	PRF1
1.74632e-48	1.07316	0.134	0.044	9.44759e-46	13	GNLY
5.35825e-48	0.214608	0.712	0.408	2.89881e-45	13	DSP
1.48918e-46	0.592255	0.382	0.202	8.05646e-44	13	SH3YL1
2.54114e-42	0.78868	0.274	0.136	1.37476e-39	13	PTRHD1
6.9534e-42	0.76089	0.291	0.149	3.76179e-39	13	PCLAF
5.50899e-41	0.853895	0.212	0.095	2.98036e-38	13	DUSP2
9.63638e-40	0.641272	0.302	0.157	5.21328e-37	13	TFAP2A
9.21639e-39	0.367852	0.273	0.131	4.98607e-36	13	CD27
1.05167e-38	1.16084	0.172	0.073	5.68953e-36	13	DMKN
1.83835e-38	0.396004	0.731	0.494	9.94547e-36	13	TRAPPC3
7.18677e-38	0.493706	0.371	0.206	3.88804e-35	13	APOBEC3B
8.89763e-38	0.449978	0.4	0.226	4.81362e-35	13	RTKN2
3.64132e-37	0.285566	0.512	0.304	1.96996e-34	13	GLIPR1
1.10045e-34	0.273239	0.596	0.39	5.95344e-32	13	SMAP2
8.16898e-34	0.369131	0.24	0.116	4.41942e-31	13	RHOH
2.20401e-33	0.494305	0.44	0.27	1.19237e-30	13	SLC5A6
1.21137e-32	0.217066	0.427	0.247	6.55349e-30	13	SERPINB9
1.87097e-32	0.30785	0.805	0.602	1.0122e-29	13	HIF1A
4.84381e-32	0.59637	0.2	0.095	2.6205e-29	13	C5orf46
1.27299e-31	0.600907	0.271	0.145	6.8869e-29	13	LAG3
3.68862e-31	0.278648	0.814	0.577	1.99555e-28	13	RUNX1
3.97145e-31	0.586145	0.334	0.194	2.14856e-28	13	CCNA2
6.84081e-29	0.395147	0.211	0.104	3.70088e-26	13	CD69
4.36073e-27	0.641919	0.19	0.094	2.35916e-24	13	TNF
4.70497e-27	0.380126	0.407	0.256	2.54539e-24	13	PIM1
8.90549e-24	0.283339	0.591	0.409	4.81787e-21	13	TMEM147
1.01081e-23	0.585891	0.245	0.143	5.46851e-21	13	STXBP4
1.06067e-23	0.464121	0.285	0.17	5.73822e-21	13	SLC25A37
1.77644e-21	0.639156	0.212	0.121	9.61052e-19	13	CCNE1
5.14194e-21	0.211202	0.322	0.202	2.78179e-18	13	GATA3
8.91987e-21	0.270416	0.734	0.569	4.82565e-18	13	NFKBIA
4.84428e-20	0.174317	0.415	0.275	2.62076e-17	13	TMEM173
4.68631e-19	0.189404	0.402	0.262	2.5353e-16	13	HAVCR2
5.57592e-18	0.125683	0.555	0.383	3.01657e-15	13	CD9
4.26265e-16	0.334207	0.36	0.247	2.30609e-13	13	EIF4EBP1
1.64001e-15	0.4916	0.158	0.09	8.87245e-13	13	KLRC1
2.8488e-15	0.235146	0.183	0.108	1.5412e-12	13	GJB2
4.27966e-15	0.502414	0.142	0.078	2.3153e-12	13	FOXP3
6.88645e-15	0.111379	0.737	0.557	3.72557e-12	13	MDM2
4.44256e-14	0.155092	0.359	0.248	2.40343e-11	13	AURKA
6.28293e-12	0.22926	0.154	0.093	3.39907e-09	13	KLRD1
1.78226e-11	0.778796	0.058	0.027	9.64205e-09	13	CXCL5
2.68144e-11	0.128454	0.182	0.117	1.45066e-08	13	KIT
6.65319e-09	0.139836	0.205	0.143	3.59938e-06	13	THAP2
8.77873e-06	0.104577	0.191	0.143	0.00474929	13	AURKB
0	2.11854	0.813	0.23	0	14	BMP7
0	2.06329	0.886	0.325	0	14	CDH1
0	2.15655	0.934	0.38	0	14	SCD
0	1.81845	0.938	0.407	0	14	DSP
0	1.74651	0.766	0.264	0	14	SDC4
0	2.34036	0.604	0.107	0	14	FOXA1
0	1.29341	0.971	0.474	0	14	KRT7
0	1.71417	0.803	0.313	0	14	SQLE
0	1.74612	0.994	0.514	0	14	EPCAM
0	1.85944	0.675	0.219	0	14	KLF5
0	2.74052	0.45	0.026	0	14	CPA3
0	1.42007	0.909	0.497	0	14	CCDC6
0	1.56754	0.985	0.586	0	14	KRT8
0	1.53575	0.978	0.586	0	14	TPD52
0	3.86888	0.388	0.012	0	14	CTSG
0	2.21519	0.455	0.094	0	14	SERHL2
0	1.79417	0.467	0.11	0	14	MLPH
0	2.19049	0.415	0.069	0	14	AR
0	2.10311	0.43	0.09	0	14	SCGB2A1
0	2.3662	0.236	0.014	0	14	TPSAB1
7.53265e-307	1.56978	0.801	0.328	4.07517e-304	14	ERBB2
5.87001e-294	1.69889	0.684	0.249	3.17567e-291	14	EEF2K
9.84595e-273	1.87959	0.373	0.083	5.32666e-270	14	AKR1C1
1.02479e-272	1.31969	0.825	0.365	5.54412e-270	14	DSC2
9.16099e-268	1.45332	0.752	0.303	4.9561e-265	14	SVIL
3.8377e-260	1.49028	0.688	0.256	2.0762e-257	14	MYO5B
9.02598e-257	1.08558	0.846	0.381	4.88306e-254	14	VEGFA
2.54323e-242	1.69112	0.585	0.204	1.37589e-239	14	MASTL
3.78215e-240	1.32295	0.815	0.381	2.04614e-237	14	CD9
3.20692e-231	1.80955	0.253	0.047	1.73494e-228	14	MUC6
5.1372e-224	1.45824	0.637	0.243	2.77923e-221	14	FASN
7.25006e-217	1.22366	0.826	0.432	3.92228e-214	14	CTTN
1.33396e-214	1.7827	0.457	0.141	7.21674e-212	14	AURKB
5.90903e-195	1.12611	0.821	0.431	3.19678e-192	14	CDC25B
1.51513e-193	1.12776	0.836	0.5	8.19687e-191	14	NARS
6.85995e-191	1.3929	0.614	0.246	3.71123e-188	14	AURKA
3.48511e-189	0.746114	0.788	0.342	1.88545e-186	14	TACSTD2
7.36671e-185	1.59592	0.479	0.165	3.98539e-182	14	HOOK2
6.00819e-177	1.26048	0.645	0.282	3.25043e-174	14	DNTTIP1
1.51542e-171	1.37701	0.521	0.195	8.1984e-169	14	JUP
4.87325e-170	1.62248	0.402	0.128	2.63643e-167	14	C6orf132
1.16562e-167	1.41245	0.542	0.217	6.30602e-165	14	FOXC1
1.11361e-153	1.24919	0.548	0.225	6.02462e-151	14	RTKN2
8.47087e-152	1.14338	0.66	0.315	4.58274e-149	14	ZNF562
4.50991e-151	1.32398	0.525	0.21	2.43986e-148	14	CENPF
3.78994e-150	1.14005	0.585	0.245	2.05036e-147	14	CDC20
1.26098e-149	1.13773	0.652	0.302	6.82189e-147	14	CCNB1
3.5383e-143	0.687649	0.98	0.65	1.91422e-140	14	CD24
4.93126e-136	1.07999	0.617	0.285	2.66781e-133	14	TOP2A
1.58257e-130	1.22591	0.474	0.191	8.56173e-128	14	TRAF4
1.2731e-120	1.03413	0.612	0.302	6.88747e-118	14	ACTG2
2.69395e-120	0.928835	0.682	0.353	1.45743e-117	14	SRPK1
6.49821e-100	0.820315	0.599	0.298	3.51553e-97	14	WEE1
1.38621e-97	0.923749	0.552	0.27	7.49939e-95	14	SLC5A6
2.54118e-93	0.989591	0.442	0.193	1.37478e-90	14	CCNA2
1.37761e-89	0.642843	0.854	0.602	7.45288e-87	14	HIF1A
4.92937e-88	1.06183	0.446	0.205	2.66679e-85	14	S100A14
4.95809e-80	0.556089	0.793	0.493	2.68233e-77	14	HMGA1
1.33978e-79	0.699059	0.438	0.201	7.2482e-77	14	GATA3
1.23625e-78	1.6531	0.122	0.029	6.68814e-76	14	HPX
3.4003e-71	0.970826	0.331	0.142	1.83956e-68	14	MKI67
2.23506e-69	0.615652	0.795	0.584	1.20917e-66	14	MAPK1
1.63638e-68	0.694204	0.619	0.36	8.85283e-66	14	QARS
8.17564e-64	1.146	0.134	0.038	4.42302e-61	14	SOX17
3.89245e-58	0.831014	0.302	0.134	2.10582e-55	14	USP53
1.24841e-56	1.38879	0.084	0.019	6.75389e-54	14	DNAAF1
2.64541e-56	0.780236	0.335	0.157	1.43117e-53	14	TFAP2A
6.628e-55	1.34981	0.11	0.03	3.58575e-52	14	AGR3
3.06418e-46	0.404913	0.777	0.522	1.65772e-43	14	SMS
2.1072e-45	1.64714	0.06	0.013	1.14e-42	14	ABCC11
1.71975e-44	0.78267	0.241	0.108	9.30383e-42	14	LYPD3
2.59566e-43	0.81838	0.297	0.149	1.40425e-40	14	PCLAF
5.78143e-43	0.622205	0.396	0.218	3.12775e-40	14	KARS
6.92161e-39	0.418798	0.613	0.402	3.74459e-36	14	LARS
2.41421e-38	0.360598	0.445	0.252	1.30609e-35	14	E2F3
1.30906e-37	0.992178	0.12	0.043	7.08201e-35	14	OXTR
5.81052e-36	0.379739	0.656	0.445	3.14349e-33	14	CREBBP
6.49641e-33	0.361004	0.707	0.494	3.51456e-30	14	TRAPPC3
6.09107e-32	0.910954	0.097	0.034	3.29527e-29	14	FOXC2
8.98566e-32	0.952507	0.066	0.019	4.86124e-29	14	TIMP4
6.62745e-31	0.438098	0.354	0.203	3.58545e-28	14	SH3YL1
9.71504e-31	0.540725	0.269	0.142	5.25584e-28	14	STXBP4
4.99509e-27	0.190484	0.678	0.465	2.70234e-24	14	FAM107B
4.39251e-26	0.834364	0.182	0.091	2.37635e-23	14	DAPK3
1.35836e-23	0.339559	0.367	0.229	7.34874e-21	14	EGFR
9.1161e-23	0.377557	0.25	0.142	4.93181e-20	14	THAP2
2.21563e-21	0.151871	0.574	0.393	1.19866e-18	14	RB1
1.21225e-20	0.678241	0.077	0.03	6.55828e-18	14	CTH
3.00921e-20	1.43851	0.028	0.006	1.62798e-17	14	LRG1
6.16341e-20	0.138925	0.346	0.215	3.33441e-17	14	TRIB1
1.67023e-19	0.136588	0.653	0.461	9.03592e-17	14	VOPP1
1.09835e-18	0.124576	0.697	0.479	5.94208e-16	14	ENAH
1.11395e-18	0.114632	0.241	0.14	6.02647e-16	14	CDC14A
7.26899e-18	0.174984	0.358	0.229	3.93252e-15	14	OCIAD2
4.10919e-17	0.181574	0.181	0.101	2.22307e-14	14	PPARG
4.16583e-17	0.216293	0.313	0.2	2.25371e-14	14	TIFA
8.43499e-17	0.185004	0.62	0.447	4.56333e-14	14	ADAM9
1.07418e-16	0.516477	0.146	0.078	5.81129e-14	14	C2orf42
1.30198e-16	0.235021	0.069	0.028	7.04369e-14	14	ANKRD30A
2.17216e-16	0.39771	0.193	0.113	1.17514e-13	14	LGALSL
1.26891e-15	0.112985	0.271	0.17	6.86481e-13	14	SLC25A37
1.43152e-15	0.162604	0.34	0.224	7.7445e-13	14	ANKRD28
1.48032e-15	0.11171	0.779	0.609	8.00855e-13	14	PTEN
1.52903e-15	0.60975	0.06	0.024	8.27206e-13	14	TAC1
1.6743e-15	0.130371	0.125	0.065	9.05798e-13	14	STC1
3.16161e-15	1.03816	0.059	0.024	1.71043e-12	14	UnassignedCodeword-0122
1.2969e-14	0.16849	0.562	0.409	7.01623e-12	14	TMEM147
4.12093e-13	0.440833	0.091	0.045	2.22942e-10	14	CLIC6
6.96624e-13	0.45172	0.068	0.031	3.76873e-10	14	AKR1C3
1.16723e-12	0.259803	0.088	0.044	6.3147e-10	14	ANKRD29
2.24912e-12	0.866173	0.039	0.014	1.21678e-09	14	CEACAM8
8.79415e-09	0.215798	0.068	0.036	4.75764e-06	14	RAPGEF3
1.06031e-08	0.155223	0.199	0.136	5.7363e-06	14	PTRHD1
6.5103e-06	0.218643	0.034	0.017	0.00352207	14	CAVIN2
1.621e-05	0.189601	0.065	0.04	0.00876958	14	SNAI1
