# Supplementary material
Source: Research Square preprint supplement (doi:10.21203/rs.3.rs-9572543/v1)
Supplement: Supplementary file 3 [file b573ec80bbd9c72cce9d34ec.docx]

**Fig. S1 Xenium data processing, cell segmentation, and quality control**

(A) Overview of transcript-level quality control, nuclear segmentation, and transcript assignment for Xenium spatial transcriptomics data. High-quality transcripts were assigned to segmented nuclei using a two-stage pipeline combining Cellpose-based nuclear segmentation and Baysor probabilistic transcript assignment for individual samples, Y1-Y8.
(B) Scatter plots for Cell-level quality control filtering: Individual scatter plots depicting thresholds for total transcript counts, and nuclear area, resulting in high-confidence single-cell data for downstream analysis.

**Fig. S2 nCounter data processing and quality control**

(A)(B) Violin and MDs plots showing nCounter data quality control using the ROSALIND® bioinformatics platform (OnRamp BioInformatics Inc. ROSALIND®). Raw counts were normalised using the geometric mean of positive control probes and stable housekeeping genes, as recommended by NanoString protocols. Normalized counts were log2-transformed for statistical analysis.

(C) Marker gene UMAPs from Xenium’s targeted spatial transcriptomics panel: Marker genes UMAPs based on consistent differential expression across multiple clusters, within and between biological replicates.

**Fig. S3 Cell-type–specific gene expression and composition of genes of interest from Xenium spatial transcriptomics panel**

(A) Bar. Plots showing proportional contribution of annotated cell types to the total expression of immune, metabolic, and resistance-related marker genes between responder (CTxP) and non-responder (CTxnP) groups.
(B) Heatmap comparison of the proportional representation of expressing cell types between responders and non-responders, highlighting immune enrichment in responders and epithelial/stromal dominance in non-responders. Statistical significance was assessed using FDR-adjusted tests.

**Figure S4. Intra-tumour spatial transcriptional heterogeneity**

Representative spatial gene expression maps illustrating intra-tumour heterogeneity in responder and non-responder tumours. Responders show spatially organised immune-enriched domains with high cytotoxic T cell marker expression, whereas non-responders exhibit resistance marker–dominated regions with minimal immune infiltration and enhanced stromal compartmentalisation.

Table S1. Clinicopathological characteristics

Table S2. Clinical characteristics of the eight cases used for nCounter and spatial transcriptome analysis

Table S3. Differentially expressed genes (nCounter) in nonresponders compared to responders (study group: non-responders, control group: responders)

Table S4. List of 330 genes included in the Xenium breast cancer targeted panel.

Table S5. Differential expression analysis based on Xenium’s targeted gene panel

Table S6. Marker genes in responders

Table S7. Marker genes in non-responders

Table S8. Cell-type composition and statistics of genes of interest between responder and non-responder groups

Table S9. Cluster-level differential gene expression of genes of interest with number of cells expressed and statistics between responder and non-responder groups

Table S10. Cell-type–specific differential expression analysis of genes of interest with number of cells expressed and statistics between responder and non-responder groups

Table S11. CellChat ligand–receptor interactions for responder and non-responder groups

Table S12. Genes of interest and Cell-type composition between responder and non-responder groups

Table S13. Comparison of genes of interest expression between groups based on the number of cells.

Table S14. Hallmark gene set enrichment analysis of LARS-high tumours in the TCGA basal breast cancer cohort.
