# Supplementary material
Source: Research Square preprint supplement (doi:10.21203/rs.3.rs-9572543/v1)
Supplement: Supplementary file 4 [file 1d43dbbd640f659818ef4b11.xlsx]

## Sheet: TableS13
Gene	Mean_CTxP	Mean_CTxnP	SD_CTxP	SD_CTxnP	n_CTxP	n_CTxnP	log2FC	Direction	ttest_pvalue	wilcox_pvalue	ttest_FDR	wilcox_FDR	sig_label	fdr_label	pval_formatted
CD247	0.307979	0.151169	1.2777	0.901306	603081	620528	0.980361	Up in responder	0	0	0	0	***	†††	p<2.2e-16
CD3E	0.640495	0.325939	1.81269	1.33077	603081	620528	0.95334	Up in responder	0	0	0	0	***	†††	p<2.2e-16
CD3G	0.294278	0.137336	1.24899	0.861178	603081	620528	1.04628	Up in responder	0	0	0	0	***	†††	p<2.2e-16
CD8A	0.542698	0.303884	1.69313	1.2918	603081	620528	0.81626	Up in responder	0	0	0	0	***	†††	p<2.2e-16
GZMA	0.432758	0.178957	1.51961	0.997209	603081	620528	1.22846	Up in responder	0	0	0	0	***	†††	p<2.2e-16
CCR2	0.304401	0.073501	1.27394	0.631304	603081	620528	1.91274	Up in responder	0	0	0	0	***	†††	p<2.2e-16
CXCL12	0.947847	0.512091	2.1482	1.64563	603081	620528	0.875494	Up in responder	0	0	0	0	***	†††	p<2.2e-16
AURKA	0.534102	0.544258	1.61439	1.61491	603081	620528	-0.0266807	Up in non-reponder	0.000504186	1.27027e-06	0.000504186	1.27027e-06	***	†††	p=5.0e-04
KIT	0.231596	0.677899	1.08853	1.7903	603081	620528	-1.5096	Up in non-reponder	0	0	0	0	***	†††	p<2.2e-16
LARS	0.870234	1.03406	1.99564	2.12081	603081	620528	-0.246244	Up in non-reponder	0	0	0	0	***	†††	p<2.2e-16
VEGFA	1.20671	1.74486	2.33585	2.60944	603081	620528	-0.528368	Up in non-reponder	0	0	0	0	***	†††	p<2.2e-16
WARS	1.25239	0.81002	2.33566	1.93815	603081	620528	0.62243	Up in responder	0	0	0	0	***	†††	p<2.2e-16
WEE1	0.703511	1.36985	1.82811	2.37898	603081	620528	-0.951506	Up in non-reponder	0	0	0	0	***	†††	p<2.2e-16
