# Supplementary material
Source: Research Square preprint supplement (doi:10.21203/rs.3.rs-9572543/v1)
Supplement: Supplementary file 5 [file 21d56d6e0c7db2ff8f2aa276.xlsx]

## Sheet: TableS10
cell_type	Gene	logFC	pvalue	FDR	signed_logp	sig_label	n_cells	cell_type_lab
Mast cells	CD8A	0	NA	NA	NA		12	Mast cells (n=12)
Mast cells	CCR2	0	NA	NA	NA		12	Mast cells (n=12)
Mast cells	CXCL12	6.71132	0.355917683749582	0.448007191522401	0.448650433563812		12	Mast cells (n=12)
Mast cells	LARS	7.5253	0.172359789490067	0.254726414556117	0.763564045004638		12	Mast cells (n=12)
Mast cells	WEE1	0	NA	NA	NA		12	Mast cells (n=12)
Mast cells	KIT	-0.546275	0.800280209522408	0.852471705284505	-0.0967579228305012		12	Mast cells (n=12)
Mast cells	CCNA1	0	NA	NA	NA		12	Mast cells (n=12)
Mast cells	CCNA2	0	NA	NA	NA		12	Mast cells (n=12)
Mast cells	CCNB1	0	NA	NA	NA		12	Mast cells (n=12)
Mast cells	CCND1	0	NA	NA	NA		12	Mast cells (n=12)
Mast cells	CDC14A	0	NA	NA	NA		12	Mast cells (n=12)
Mast cells	CDC20	0	NA	NA	NA		12	Mast cells (n=12)
Mast cells	E2F3	0	NA	NA	NA		12	Mast cells (n=12)
NK cells	CD8A	1.21911	0.340377281573124	0.444085984552435	0.468039434535425		71	NK cells (n=71)
NK cells	CCR2	0	NA	NA	NA		71	NK cells (n=71)
NK cells	CXCL12	-0.458695	0.731707404631938	0.8039153721943	-0.135662550030814		71	NK cells (n=71)
NK cells	LARS	6.28879	0.0129419480710189	0.0258504389700912	1.88800034709728	*†	71	NK cells (n=71)
NK cells	WEE1	3.63345	0.322431340015967	0.425160750870209	0.491562751809572		71	NK cells (n=71)
NK cells	KIT	0	NA	NA	NA		71	NK cells (n=71)
NK cells	CCNA1	0	NA	NA	NA		71	NK cells (n=71)
NK cells	CCNA2	-0.148636	0.932124189403346	0.95392607400354	-0.0305262215736074		71	NK cells (n=71)
NK cells	CCNB1	0	NA	NA	NA		71	NK cells (n=71)
NK cells	CCND1	-0.537167	0.562177879279521	0.651970179442222	-0.250126247123891		71	NK cells (n=71)
NK cells	CDC14A	3.77196	0.322431340015968	0.425160750870209	0.491562751809571		71	NK cells (n=71)
NK cells	CDC20	5.66589	0.0445475401480845	0.0774941583826053	1.35117627208968	*	71	NK cells (n=71)
NK cells	E2F3	0.0356485	0.983264537892197	0.989187818240945	0.00732962368283909		71	NK cells (n=71)
Dendritic cells	CD8A	3.9347	0.159908229374985	0.238434592014486	0.796129185533441		131	Dendritic cells (n=131)
Dendritic cells	CCR2	1.51064	0.228332729380967	0.325910818860013	0.641431831958011		131	Dendritic cells (n=131)
Dendritic cells	CXCL12	-6.38797	0.0130026160089082	0.0258504389700912	-1.8859692627749	*†	131	Dendritic cells (n=131)
Dendritic cells	LARS	-0.224659	0.827815958856203	0.865524632748962	-0.0820662054100371		131	Dendritic cells (n=131)
Dendritic cells	WEE1	4.01838	0.158515700477628	0.238434592014486	0.799927715824123		131	Dendritic cells (n=131)
Dendritic cells	KIT	0.937108	0.48575604870927	0.579437572388915	0.31358178279261		131	Dendritic cells (n=131)
Dendritic cells	CCNA1	-3.86822	0.32277847875431	0.425160750870209	-0.49109542955663		131	Dendritic cells (n=131)
Dendritic cells	CCNA2	0	NA	NA	NA		131	Dendritic cells (n=131)
Dendritic cells	CCNB1	-1.82436	0.323325840482135	0.425160750870209	-0.490359584808988		131	Dendritic cells (n=131)
Dendritic cells	CCND1	5.48753	0.0135857583319694	0.0266920193110458	1.86691611505264	*†	131	Dendritic cells (n=131)
Dendritic cells	CDC14A	-1.63888	0.356796146541792	0.448007191522401	-0.44757984472381		131	Dendritic cells (n=131)
Dendritic cells	CDC20	-0.867675	0.669569232958336	0.75736010213919	-0.174204510605311		131	Dendritic cells (n=131)
Dendritic cells	E2F3	-1.44026	0.298837347425376	0.405738512358031	-0.524565127180694		131	Dendritic cells (n=131)
Epithelial cells	CD8A	-2.09525	0.159069804131034	0.238434592014486	-0.798412253690193		438	Epithelial cells (n=438)
Epithelial cells	CCR2	-2.01654	0.157957110885416	0.238434592014486	-0.8014608183262		438	Epithelial cells (n=438)
Epithelial cells	CXCL12	1.68815	0.481840471106455	0.579437572388915	0.317096725217615		438	Epithelial cells (n=438)
Epithelial cells	LARS	-0.914851	0.3892783508796	0.478010916153627	-0.409739748233968		438	Epithelial cells (n=438)
Epithelial cells	WEE1	-0.395685	0.754163091389885	0.823171478837325	-0.122534725706499		438	Epithelial cells (n=438)
Epithelial cells	KIT	-0.0191029	0.989345469065108	0.989345469065108	-0.00465203083940641		438	Epithelial cells (n=438)
Epithelial cells	CCNA1	-3.1346	0.0252029269303907	0.0472223277296491	-1.59854901969851	*†	438	Epithelial cells (n=438)
Epithelial cells	CCNA2	-3.21581	0.0255636426237509	0.0472223277296491	-1.59237726245887	*†	438	Epithelial cells (n=438)
Epithelial cells	CCNB1	-4.95005	1.09253107855077e-05	2.72317447937282e-05	-4.96156620007733	***†††	438	Epithelial cells (n=438)
Epithelial cells	CCND1	-2.07813	0.00443251992533349	0.00961338737052848	-2.35334930345565	**††	438	Epithelial cells (n=438)
Epithelial cells	CDC14A	-4.19028	0.000862584231946061	0.00200071620465267	-3.06419848502777	***††	438	Epithelial cells (n=438)
Epithelial cells	CDC20	0.501769	0.675728474363709	0.75736010213919	0.170227780056109		438	Epithelial cells (n=438)
Epithelial cells	E2F3	-2.03748	0.157557321765738	0.238434592014486	-0.802561410144231		438	Epithelial cells (n=438)
Adipocytes	CD8A	0.987698	0.010600082060138	0.0218544901733709	1.97469077264776	*†	2273	Adipocytes (n=2273)
Adipocytes	CCR2	-0.0435052	0.938536189896406	0.95392607400354	-0.0275489763518718		2273	Adipocytes (n=2273)
Adipocytes	CXCL12	0.568032	4.83375277264022e-10	1.36819781869647e-09	9.31571556580752	***†††	2273	Adipocytes (n=2273)
Adipocytes	LARS	-0.0414861	0.788934378471619	0.852471705284505	-0.102959118784086		2273	Adipocytes (n=2273)
Adipocytes	WEE1	-0.22637	0.527829698597638	0.61641650115948	-0.277506177635838		2273	Adipocytes (n=2273)
Adipocytes	KIT	-0.955093	0.0353900196380755	0.0628737582931767	-1.45111919637053	*	2273	Adipocytes (n=2273)
Adipocytes	CCNA1	-1.20087	0.104885204098362	0.170056593052684	-0.979285772356008		2273	Adipocytes (n=2273)
Adipocytes	CCNA2	0.529224	0.214922175924972	0.309413822236814	0.66771877117693		2273	Adipocytes (n=2273)
Adipocytes	CCNB1	-0.306126	0.343601376376252	0.444817285696388	-0.463945105168461		2273	Adipocytes (n=2273)
Adipocytes	CCND1	-0.041022	0.71864834033076	0.794796508842629	-0.143483573058448		2273	Adipocytes (n=2273)
Adipocytes	CDC14A	0.330847	0.231120169196777	0.32709379877849	0.636162153228589		2273	Adipocytes (n=2273)
Adipocytes	CDC20	-0.113672	0.806530116376957	0.852471705284505	-0.09337941112421		2273	Adipocytes (n=2273)
Adipocytes	E2F3	0.839911	0.025731927086216	0.0472223277296491	1.58952768788332	*†	2273	Adipocytes (n=2273)
Endothelial cells	CD8A	1.01848	0.0016346269082472	0.00368895531996328	2.78658135626324	**††	3601	Endothelial cells (n=3601)
Endothelial cells	CCR2	1.09072	0.0154767153030288	0.0297081776506414	1.81032120625893	*†	3601	Endothelial cells (n=3601)
Endothelial cells	CXCL12	0.457562	3.90883601242769e-07	1.01996189699285e-06	6.40795254916142	***†††	3601	Endothelial cells (n=3601)
Endothelial cells	LARS	0.154038	0.279329593272936	0.387227706697582	0.553883051000364		3601	Endothelial cells (n=3601)
Endothelial cells	WEE1	-0.832518	0.0145759736270566	0.0283045069269588	-1.83636242615827	*†	3601	Endothelial cells (n=3601)
Endothelial cells	KIT	-1.0844	0.00113493098842485	0.00259634897351986	-2.94503054574618	**††	3601	Endothelial cells (n=3601)
Endothelial cells	CCNA1	-1.0299	0.116573775033451	0.18719058106333	-0.933399139450634		3601	Endothelial cells (n=3601)
Endothelial cells	CCNA2	-0.728846	0.0927128051392155	0.151794494688716	-1.03286027861454		3601	Endothelial cells (n=3601)
Endothelial cells	CCNB1	-0.187353	0.515059080690406	0.610034514009205	-0.28814295164584		3601	Endothelial cells (n=3601)
Endothelial cells	CCND1	-0.194984	0.032909473310797	0.059737848292425	-1.48267906817797	*	3601	Endothelial cells (n=3601)
Endothelial cells	CDC14A	-0.182062	0.453219690958608	0.552464878759763	-0.343691229680457		3601	Endothelial cells (n=3601)
Endothelial cells	CDC20	-0.0834393	0.829245157124754	0.865524632748962	-0.081317056124594		3601	Endothelial cells (n=3601)
Endothelial cells	E2F3	-0.27735	0.298347722827133	0.405738512358031	-0.525277272609173		3601	Endothelial cells (n=3601)
Smooth muscle cells	CD8A	0.577199	0.0739988452360444	0.123578071544194	1.13077505745182		4359	Smooth muscle cells (n=4359)
Smooth muscle cells	CCR2	1.16071	0.0112764484715821	0.0229654499360269	1.94782766028711	*†	4359	Smooth muscle cells (n=4359)
Smooth muscle cells	CXCL12	0.339775	0.00339369374147761	0.00745719545824685	2.46932735246843	**††	4359	Smooth muscle cells (n=4359)
Smooth muscle cells	LARS	0.18005	0.0334761388405556	0.0601130665201374	1.47526463959583	*	4359	Smooth muscle cells (n=4359)
Smooth muscle cells	WEE1	-0.249038	0.371268881448858	0.462700770163876	-0.430311450400573		4359	Smooth muscle cells (n=4359)
Smooth muscle cells	KIT	-0.11195	0.804689200540953	0.852471705284505	-0.0943718271519119		4359	Smooth muscle cells (n=4359)
Smooth muscle cells	CCNA1	0.239927	0.666378834065208	0.75736010213919	0.176278805710914		4359	Smooth muscle cells (n=4359)
Smooth muscle cells	CCNA2	0.0747638	0.85821900818077	0.89020232525583	0.0664018707674583		4359	Smooth muscle cells (n=4359)
Smooth muscle cells	CCNB1	-0.271105	0.355894125539893	0.448007191522401	-0.448679180489169		4359	Smooth muscle cells (n=4359)
Smooth muscle cells	CCND1	0.00764327	0.942501809644216	0.95392607400354	0.0257178072571907		4359	Smooth muscle cells (n=4359)
Smooth muscle cells	CDC14A	-0.254577	0.483569932256966	0.579437572388915	-0.315540710832041		4359	Smooth muscle cells (n=4359)
Smooth muscle cells	CDC20	-0.374591	0.267457901374533	0.375340080080227	-0.572744567435553		4359	Smooth muscle cells (n=4359)
Smooth muscle cells	E2F3	-0.115849	0.697152270248799	0.776162860876997	-0.156672354030689		4359	Smooth muscle cells (n=4359)
Breast myoepithelial cells	CD8A	1.32565	2.33761838897566e-05	5.65771407186863e-05	4.63122638500011	***†††	7509	Breast myoepithelial cells (n=7509)
Breast myoepithelial cells	CCR2	1.04913	0.0701568642512005	0.118345417474247	1.1539298305433		7509	Breast myoepithelial cells (n=7509)
Breast myoepithelial cells	CXCL12	1.59628	1.75557324433521e-10	5.63809099623039e-10	9.75558104660476	***†††	7509	Breast myoepithelial cells (n=7509)
Breast myoepithelial cells	LARS	-0.65114	8.52571272282268e-07	2.19045234570983e-06	-6.06926930516236	***†††	7509	Breast myoepithelial cells (n=7509)
Breast myoepithelial cells	WEE1	-0.947643	1.39684820555763e-08	3.76247823109878e-08	-7.85485078577594	***†††	7509	Breast myoepithelial cells (n=7509)
Breast myoepithelial cells	KIT	-2.19121	4.57887778185474e-34	2.38960184240544e-33	-33.3392409483864	***†††	7509	Breast myoepithelial cells (n=7509)
Breast myoepithelial cells	CCNA1	-2.78395	2.46685969549395e-24	1.05632197217305e-23	-23.6078555506341	***†††	7509	Breast myoepithelial cells (n=7509)
Breast myoepithelial cells	CCNA2	-1.35197	1.08042765982426e-09	3.00719031984419e-09	-8.96640430605134	***†††	7509	Breast myoepithelial cells (n=7509)
Breast myoepithelial cells	CCNB1	-1.40469	4.26377796849979e-25	1.87381821247227e-24	-24.3702054187953	***†††	7509	Breast myoepithelial cells (n=7509)
Breast myoepithelial cells	CCND1	-1.37644	1.23414765162774e-57	7.63343177117897e-57	-56.9086328788351	***†††	7509	Breast myoepithelial cells (n=7509)
Breast myoepithelial cells	CDC14A	-1.59183	5.92058634409784e-17	2.19719537658742e-16	-16.227635280879	***†††	7509	Breast myoepithelial cells (n=7509)
Breast myoepithelial cells	CDC20	-1.44919	1.89868964882555e-20	7.5495516989016e-20	-19.7215460172627	***†††	7509	Breast myoepithelial cells (n=7509)
Breast myoepithelial cells	E2F3	-1.35987	3.53659492722326e-10	1.07383882335688e-09	-9.4514146803453	***†††	7509	Breast myoepithelial cells (n=7509)
B cells	CD8A	-0.0364986	0.802931280379332	0.852471705284505	-0.0953216226281125		18013	B cells (n=18013)
B cells	CCR2	1.08972	4.40277257517427e-88	4.32507658855355e-87	87.3562737474039	***†††	18013	B cells (n=18013)
B cells	CXCL12	0.316607	5.88278571104838e-05	0.0001383697484148	4.23041697112712	***†††	18013	B cells (n=18013)
B cells	LARS	0.127279	0.189859769633304	0.278127908147033	0.721567050414263		18013	B cells (n=18013)
B cells	WEE1	-0.310871	0.134391348868096	0.211729766612944	-0.871628687084084		18013	B cells (n=18013)
B cells	KIT	-0.796678	0.00585320814541923	0.0122185720035626	-2.2326060317034	**†	18013	B cells (n=18013)
B cells	CCNA1	-0.370365	0.352069699485458	0.448007191522401	-0.453371350426893		18013	B cells (n=18013)
B cells	CCNA2	0.102396	0.646727154646777	0.74485127466215	0.189278903602649		18013	B cells (n=18013)
B cells	CCNB1	-0.127802	0.52508122481011	0.61641650115948	-0.279773510387755		18013	B cells (n=18013)
B cells	CCND1	-0.202655	0.0768306232296925	0.127036773062957	-1.11446564391566		18013	B cells (n=18013)
B cells	CDC14A	-0.313253	0.210745610447199	0.306039277779845	-0.67624146238964		18013	B cells (n=18013)
B cells	CDC20	-0.288367	0.280566182697051	0.387227706697582	-0.551964676690187		18013	B cells (n=18013)
B cells	E2F3	0.017394	0.902715879306939	0.930577480520116	0.0444489179759223		18013	B cells (n=18013)
Breast cancer	CD8A	0.767745	1.04567002543854e-31	4.9893398356639e-31	30.9806053410327	***†††	78967	Breast cancer (n=78967)
Breast cancer	CCR2	1.40072	3.46999031089701e-41	1.86931736103161e-40	40.459671737869	***†††	78967	Breast cancer (n=78967)
Breast cancer	CXCL12	0.914375	0	0	Inf	***†††	78967	Breast cancer (n=78967)
Breast cancer	LARS	-0.126098	1.46185515750491e-05	3.59014428387235e-05	-4.83509565570414	***†††	78967	Breast cancer (n=78967)
Breast cancer	WEE1	-0.924936	4.04924302580804e-151	5.20171988699957e-150	-150.392626157141	***†††	78967	Breast cancer (n=78967)
Breast cancer	KIT	-1.1027	2.76540526295166e-238	3.84852232427439e-237	-237.558241214968	***†††	78967	Breast cancer (n=78967)
Breast cancer	CCNA1	-1.64219	4.22505196071169e-64	2.71378337476482e-63	-63.3741679456228	***†††	78967	Breast cancer (n=78967)
Breast cancer	CCNA2	-0.338953	1.1260105529686e-10	3.68713259501483e-10	-9.9484575392586	***†††	78967	Breast cancer (n=78967)
Breast cancer	CCNB1	-0.445718	1.04413607978616e-48	6.22752590443886e-48	-47.9812428970723	***†††	78967	Breast cancer (n=78967)
Breast cancer	CCND1	-0.23922	4.73517264629338e-73	3.29489096637914e-72	-72.3246641818211	***†††	78967	Breast cancer (n=78967)
Breast cancer	CDC14A	-1.07862	6.84918477293999e-77	5.44673265276657e-76	-76.1643611175124	***†††	78967	Breast cancer (n=78967)
Breast cancer	CDC20	-0.239454	2.15336996639915e-11	7.33903641609507e-11	-10.6668813484569	***†††	78967	Breast cancer (n=78967)
Breast cancer	E2F3	-0.295353	4.68876812989609e-10	1.35004185809077e-09	-9.32894124356666	***†††	78967	Breast cancer (n=78967)
Macrophages	CD8A	0.347267	4.27857440834657e-16	1.55330853520408e-15	15.3687009108283	***†††	82288	Macrophages (n=82288)
Macrophages	CCR2	0.586546	1.3557431815845e-31	6.28914198123921e-31	30.8678225710767	***†††	82288	Macrophages (n=82288)
Macrophages	CXCL12	0.41996	6.98313368957076e-78	6.13780697978061e-77	77.1559496434685	***†††	82288	Macrophages (n=82288)
Macrophages	LARS	-0.0514567	0.148496538176378	0.231765625004254	-0.828283670713237		82288	Macrophages (n=82288)
Macrophages	WEE1	-0.408246	1.89741963386649e-10	5.97866186520197e-10	-9.72183660979742	***†††	82288	Macrophages (n=82288)
Macrophages	KIT	-1.02055	1.24455283283635e-22	5.06927617277247e-22	-21.9049866623159	***†††	82288	Macrophages (n=82288)
Macrophages	CCNA1	-0.84093	4.33278138621094e-10	1.26942893245127e-09	-9.36323322307211	***†††	82288	Macrophages (n=82288)
Macrophages	CCNA2	0.188499	0.0033737969828949	0.00745719545824685	2.47188105448584	**††	82288	Macrophages (n=82288)
Macrophages	CCNB1	-0.214907	3.10563304463982e-05	7.40915312078357e-05	-4.50784986093936	***†††	82288	Macrophages (n=82288)
Macrophages	CCND1	-0.491594	8.64089599742351e-76	6.55922559804421e-75	-75.0634412220395	***†††	82288	Macrophages (n=82288)
Macrophages	CDC14A	-0.348131	9.81995684626977e-07	2.48474665655614e-06	-6.00789042071286	***†††	82288	Macrophages (n=82288)
Macrophages	CDC20	-0.354265	6.46577085864662e-08	1.71394243395871e-07	-7.18937969047434	***†††	82288	Macrophages (n=82288)
Macrophages	E2F3	0.118247	0.0190859999249523	0.0362200225848526	1.71928508221667	*†	82288	Macrophages (n=82288)
Fibroblasts	CD8A	0.0892105	0.0658205287999832	0.112163554179563	1.18163863291992		89738	Fibroblasts (n=89738)
Fibroblasts	CCR2	1.34591	1.94387252302845e-80	1.80348172969862e-79	79.7113322190191	***†††	89738	Fibroblasts (n=89738)
Fibroblasts	CXCL12	0.287136	2.3508435349715e-143	2.80422050243029e-142	142.628776275239	***†††	89738	Fibroblasts (n=89738)
Fibroblasts	LARS	-0.0480411	0.120252177054063	0.191258224457415	-0.919907052384418		89738	Fibroblasts (n=89738)
Fibroblasts	WEE1	-0.355036	2.0054377195241e-11	6.97725206584425e-11	-10.6977908208362	***†††	89738	Fibroblasts (n=89738)
Fibroblasts	KIT	-1.09499	9.70858186763583e-33	4.9131308239248e-32	-32.0128442028458	***†††	89738	Fibroblasts (n=89738)
Fibroblasts	CCNA1	-0.705463	3.11681352478274e-12	1.10746352901855e-11	-11.5062891802642	***†††	89738	Fibroblasts (n=89738)
Fibroblasts	CCNA2	0.209145	0.00539290492293551	0.01140019141937	2.2681772362682	**†	89738	Fibroblasts (n=89738)
Fibroblasts	CCNB1	-0.475857	4.60466593415386e-18	1.7476800250084e-17	-17.3368018721373	***†††	89738	Fibroblasts (n=89738)
Fibroblasts	CCND1	0.0416258	0.0609834099376789	0.104992056284457	1.21478829535743		89738	Fibroblasts (n=89738)
Fibroblasts	CDC14A	-0.0298357	0.672097383941579	0.75736010213919	-0.17256779503509		89738	Fibroblasts (n=89738)
Fibroblasts	CDC20	-0.195048	0.00514996844391941	0.0110262144889044	-2.28819543206049	**†	89738	Fibroblasts (n=89738)
Fibroblasts	E2F3	-0.111737	0.041186307901642	0.0724011938902549	-1.38524713811912	*	89738	Fibroblasts (n=89738)
T cells	CD8A	-0.127612	8.07692379190538e-29	3.64553046823838e-28	-28.0927540147925	***†††	212470	T cells (n=212470)
T cells	CCR2	1.07518	0	0	Inf	***†††	212470	T cells (n=212470)
T cells	CXCL12	0.365963	1.66913695738369e-110	1.85830581255384e-109	109.777508026775	***†††	212470	T cells (n=212470)
T cells	LARS	-0.103646	1.26941729087014e-08	3.47528996025104e-08	-7.89639559040969	***†††	212470	T cells (n=212470)
T cells	WEE1	-0.245692	4.28172587009781e-20	1.66290283792171e-19	-19.3683811410852	***†††	212470	T cells (n=212470)
T cells	KIT	-0.946889	6.7341500817494e-95	7.02876914782594e-94	-94.1717172088643	***†††	212470	T cells (n=212470)
T cells	CCNA1	-0.682553	1.09775387437172e-22	4.58312242550193e-22	-21.9594950214381	***†††	212470	T cells (n=212470)
T cells	CCNA2	0.181254	3.66446490726394e-10	1.09279578484478e-09	9.43598943297064	***†††	212470	T cells (n=212470)
T cells	CCNB1	-0.282299	1.08903532008457e-45	6.27134132600427e-45	-44.9629580347813	***†††	212470	T cells (n=212470)
T cells	CCND1	-0.817239	0	0	-Inf	***†††	212470	T cells (n=212470)
T cells	CDC14A	-0.404615	2.11758738424059e-73	1.53755257899208e-72	-72.6741586590561	***†††	212470	T cells (n=212470)
T cells	CDC20	-0.285947	3.81030119838826e-32	1.87153029450247e-31	-31.4190406926636	***†††	212470	T cells (n=212470)
T cells	E2F3	0.023229	0.375150613966369	0.464075203943583	0.425794338452819		212470	T cells (n=212470)
Breast glandular cells	CD8A	0.827041	0	0	Inf	***†††	723736	Breast glandular cells (n=723736)
Breast glandular cells	CCR2	1.18986	1.17014507561041e-319	1.77649208012554e-318	318.931760290706	***†††	723736	Breast glandular cells (n=723736)
Breast glandular cells	CXCL12	0.984391	0	0	Inf	***†††	723736	Breast glandular cells (n=723736)
Breast glandular cells	LARS	-0.0416846	5.39321089223568e-11	1.80133243800672e-10	-10.2681525970411	***†††	723736	Breast glandular cells (n=723736)
Breast glandular cells	WEE1	-0.596888	0	0	-Inf	***†††	723736	Breast glandular cells (n=723736)
Breast glandular cells	KIT	-1.14563	0	0	-Inf	***†††	723736	Breast glandular cells (n=723736)
Breast glandular cells	CCNA1	-2.16228	0	0	-Inf	***†††	723736	Breast glandular cells (n=723736)
Breast glandular cells	CCNA2	-0.158156	3.70863261519826e-64	2.47736658695244e-63	-63.4307861866484	***†††	723736	Breast glandular cells (n=723736)
Breast glandular cells	CCNB1	-0.0410333	2.01761209976303e-10	6.23965223445233e-10	-9.69516232626834	***†††	723736	Breast glandular cells (n=723736)
Breast glandular cells	CCND1	-0.668521	0	0	-Inf	***†††	723736	Breast glandular cells (n=723736)
Breast glandular cells	CDC14A	-1.20375	0	0	-Inf	***†††	723736	Breast glandular cells (n=723736)
Breast glandular cells	CDC20	0.101619	1.68821189218014e-41	9.39771286646944e-41	40.7725730447783	***†††	723736	Breast glandular cells (n=723736)
Breast glandular cells	E2F3	-0.145453	5.67636524338369e-77	4.73976497822538e-76	-76.2459296678159	***†††	723736	Breast glandular cells (n=723736)
