# Supplementary material
Source: Research Square preprint supplement (doi:10.21203/rs.3.rs-9572543/v1)
Supplement: Supplementary file 6 [file 31d7fa097a8ff44daef362e0.xlsx]

## Sheet: TableS5
logFC	logCPM	F	PValue	FDR	gene	p_sig	fdr_sig	sig_label	direction	direction_fdr	PValue_plot	direction_plot
-1.79059	9.60823	11.1459	0.00766177	0.442419	CCR2	**	NA	**	Down in non-responder (p<0.05)	Not significant	0.00766177	Down in non-responder (p<0.05)
-1.10906	8.14625	10.1552	0.0098858	0.442419	KLRF1	**	NA	**	Down in non-responder (p<0.06)	Not significant	0.0098858	Down in non-responder (p<0.06)
-2.06179	8.92889	9.64702	0.0113293	0.442419	CD79A	*	NA	*	Down in non-responder (p<0.07)	Not significant	0.0113293	Down in non-responder (p<0.07)
-2.54653	10.1171	8.7592	0.0145186	0.442419	MMP1	*	NA	*	Down in non-responder (p<0.08)	Not significant	0.0145186	Down in non-responder (p<0.08)
-1.5325	7.77077	7.00028	0.0247773	0.442419	TNFRSF17	*	NA	*	Down in non-responder (p<0.09)	Not significant	0.0247773	Down in non-responder (p<0.09)
-1.42284	7.52128	6.7442	0.0269298	0.442419	CD19	*	NA	*	Down in non-responder (p<0.10)	Not significant	0.0269298	Down in non-responder (p<0.10)
-3.23025	9.84193	6.29309	0.0313068	0.442419	CEACAM6	*	NA	*	Down in non-responder (p<0.11)	Not significant	0.0313068	Down in non-responder (p<0.11)
-2.16765	8.2373	6.25741	0.0316888	0.442419	SSTR2	*	NA	*	Down in non-responder (p<0.12)	Not significant	0.0316888	Down in non-responder (p<0.12)
-1.63608	11.2414	6.2116	0.0321877	0.442419	SLAMF7	*	NA	*	Down in non-responder (p<0.13)	Not significant	0.0321877	Down in non-responder (p<0.13)
-1.32862	9.4926	6.13755	0.0330148	0.442419	PTGDS	*	NA	*	Down in non-responder (p<0.14)	Not significant	0.0330148	Down in non-responder (p<0.14)
-1.05304	7.74231	5.76033	0.0376562	0.442419	CD79B	*	NA	*	Down in non-responder (p<0.15)	Not significant	0.0376562	Down in non-responder (p<0.15)
-1.67603	11.41	5.68553	0.0386696	0.442419	TENT5C	*	NA	*	Down in non-responder (p<0.16)	Not significant	0.0386696	Down in non-responder (p<0.16)
-1.12071	8.92559	5.49403	0.0414208	0.442419	GZMB	*	NA	*	Down in non-responder (p<0.17)	Not significant	0.0414208	Down in non-responder (p<0.17)
-1.0209	10.8012	5.01851	0.0493675	0.442419	APOC1	*	NA	*	Down in non-responder (p<0.18)	Not significant	0.0493675	Down in non-responder (p<0.18)
2.61433	11.8151	4.89679	0.0516967	0.442419	GJB2		NA		Not significant	Not significant	0.0516967	Not significant
0.925312	8.00935	4.86969	0.0522335	0.442419	FOXC2		NA		Not significant	Not significant	0.0522335	Not significant
-1.10278	9.68636	4.79444	0.0537608	0.442419	CCL8		NA		Not significant	Not significant	0.0537608	Not significant
1.56337	13.7205	4.69338	0.0558999	0.442419	DSP		NA		Not significant	Not significant	0.0558999	Not significant
-0.90844	9.32298	4.6399	0.0570743	0.442419	LAG3		NA		Not significant	Not significant	0.0570743	Not significant
1.15806	8.68131	4.62783	0.0573436	0.442419	MYH11		NA		Not significant	Not significant	0.0573436	Not significant
-2.21685	10.2432	4.58555	0.0582995	0.442419	BMP7		NA		Not significant	Not significant	0.0582995	Not significant
-0.98786	10.1876	4.53542	0.0594584	0.442419	CYTIP		NA		Not significant	Not significant	0.0594584	Not significant
1.11087	10.9644	4.51525	0.0599328	0.442419	TFAP2A		NA		Not significant	Not significant	0.0599328	Not significant
-1.30592	9.03845	4.50913	0.0600775	0.442419	PRF1		NA		Not significant	Not significant	0.0600775	Not significant
1.07211	11.4336	4.49858	0.0603283	0.442419	JUP		NA		Not significant	Not significant	0.0603283	Not significant
-0.874587	9.47803	4.31719	0.0648489	0.442419	ITGAM		NA		Not significant	Not significant	0.0648489	Not significant
0.761751	12.123	4.28223	0.0657681	0.442419	STAT3		NA		Not significant	Not significant	0.0657681	Not significant
-1.28853	9.07986	4.2679	0.0661494	0.442419	MS4A1		NA		Not significant	Not significant	0.0661494	Not significant
-1.13997	8.92618	4.12216	0.0701886	0.442419	BANK1		NA		Not significant	Not significant	0.0701886	Not significant
-1.07322	8.9812	4.03239	0.0728299	0.442419	CD27		NA		Not significant	Not significant	0.0728299	Not significant
-2.34957	10.2273	4.00498	0.073661	0.442419	SPIB		NA		Not significant	Not significant	0.073661	Not significant
0.85483	13.1116	4.00209	0.0737494	0.442419	MAPK1		NA		Not significant	Not significant	0.0737494	Not significant
0.81508	10.7205	3.94182	0.0756215	0.442419	HOOK2		NA		Not significant	Not significant	0.0756215	Not significant
2.82308	9.05019	3.91698	0.0764101	0.442419	AGR3		NA		Not significant	Not significant	0.0764101	Not significant
0.819316	8.07194	3.84584	0.0787268	0.442419	AVPR1A		NA		Not significant	Not significant	0.0787268	Not significant
1.53629	11.402	3.83024	0.0792463	0.442419	KIT		NA		Not significant	Not significant	0.0792463	Not significant
-1.0679	8.95301	3.8082	0.0799876	0.442419	PDCD1LG2		NA		Not significant	Not significant	0.0799876	Not significant
2.02544	9.78957	3.7282	0.0827533	0.442419	AR		NA		Not significant	Not significant	0.0827533	Not significant
1.80262	8.77912	3.71285	0.0832975	0.442419	NCAM1		NA		Not significant	Not significant	0.0832975	Not significant
-1.02413	11.0125	3.64949	0.0855915	0.442419	ADGRE5		NA		Not significant	Not significant	0.0855915	Not significant
-1.09173	10.9554	3.6256	0.0864773	0.442419	IL2RG		NA		Not significant	Not significant	0.0864773	Not significant
-0.899286	8.77609	3.6243	0.0865255	0.442419	IL3RA		NA		Not significant	Not significant	0.0865255	Not significant
1.18253	7.98527	3.59585	0.087596	0.442419	HPX		NA		Not significant	Not significant	0.087596	Not significant
-0.737848	11.264	3.547	0.0894728	0.442419	AIF1		NA		Not significant	Not significant	0.0894728	Not significant
2.71701	10.1829	3.53089	0.0901029	0.442419	PIGR		NA		Not significant	Not significant	0.0901029	Not significant
0.796196	12.0752	3.51628	0.0906792	0.442419	SRPK1		NA		Not significant	Not significant	0.0906792	Not significant
1.22278	7.39725	3.50031	0.0913142	0.442419	ADIPOQ		NA		Not significant	Not significant	0.0913142	Not significant
1.05248	12.5219	3.48225	0.0920391	0.442419	ERBB2		NA		Not significant	Not significant	0.0920391	Not significant
-0.95834	10.9754	3.43711	0.0938832	0.442419	C1QA		NA		Not significant	Not significant	0.0938832	Not significant
-0.835066	9.42084	3.40641	0.0951637	0.442419	SLAMF1		NA		Not significant	Not significant	0.0951637	Not significant
-0.731857	11.255	3.38191	0.0962014	0.442419	CD14		NA		Not significant	Not significant	0.0962014	Not significant
1.275	11.6475	3.36923	0.0967443	0.442419	FOXC1		NA		Not significant	Not significant	0.0967443	Not significant
1.84843	6.1055	3.35695	0.0972816	0.442419	LRG1		NA		Not significant	Not significant	0.0972816	Not significant
0.810577	13.3452	3.34325	0.0978685	0.442419	RUNX1		NA		Not significant	Not significant	0.0978685	Not significant
2.1845	10.8466	3.26024	0.101572	0.442821	SERHL2		NA		Not significant	Not significant	0.101572	Not significant
-1.38418	9.36739	3.2555	0.101789	0.442821	LTB		NA		Not significant	Not significant	0.101789	Not significant
-0.898115	9.59289	3.25126	0.101983	0.442821	DPT		NA		Not significant	Not significant	0.101983	Not significant
-0.911137	10.4297	3.20772	0.104007	0.445742	PRDM1		NA		Not significant	Not significant	0.104007	Not significant
-0.823893	11.2536	3.12046	0.108217	0.448873	C1QC		NA		Not significant	Not significant	0.108217	Not significant
0.891554	11.6735	3.10826	0.108823	0.448873	CENPF		NA		Not significant	Not significant	0.108823	Not significant
0.936248	10.3969	3.08883	0.109797	0.448873	USP53		NA		Not significant	Not significant	0.109797	Not significant
0.892849	9.41784	3.05198	0.111674	0.448873	AKR1C1		NA		Not significant	Not significant	0.111674	Not significant
1.46691	11.9879	2.97566	0.115692	0.448873	BCL2		NA		Not significant	Not significant	0.115692	Not significant
0.7798	7.96904	2.94411	0.117407	0.448873	EGFL7		NA		Not significant	Not significant	0.117407	Not significant
-0.767211	10.0765	2.93863	0.117709	0.448873	MRC1		NA		Not significant	Not significant	0.117709	Not significant
0.933082	12.3976	2.9242	0.118506	0.448873	TOP2A		NA		Not significant	Not significant	0.118506	Not significant
1.13828	10.4336	2.90019	0.119849	0.448873	CDC14A		NA		Not significant	Not significant	0.119849	Not significant
0.74981	10.5574	2.85394	0.12249	0.448873	PCLAF		NA		Not significant	Not significant	0.12249	Not significant
0.891926	11.0594	2.84672	0.122909	0.448873	SLC25A37		NA		Not significant	Not significant	0.122909	Not significant
0.788651	12.8685	2.81925	0.12452	0.448873	ACTA2		NA		Not significant	Not significant	0.12452	Not significant
0.535019	5.58004	2.81555	0.124744	0.448873	OPRPN		NA		Not significant	Not significant	0.124744	Not significant
-0.619979	6.68711	2.79203	0.126143	0.448873	CLEC9A		NA		Not significant	Not significant	0.126143	Not significant
-0.779667	8.77653	2.78119	0.126796	0.448873	CXCR6		NA		Not significant	Not significant	0.126796	Not significant
0.961509	9.17676	2.77163	0.127376	0.448873	PDK4		NA		Not significant	Not significant	0.127376	Not significant
0.588625	8.34492	2.7637	0.127861	0.448873	OXTR		NA		Not significant	Not significant	0.127861	Not significant
-0.769067	10.5888	2.66839	0.133863	0.452227	IGSF6		NA		Not significant	Not significant	0.133863	Not significant
0.831196	13.2335	2.66607	0.134014	0.452227	VEGFA		NA		Not significant	Not significant	0.134014	Not significant
1.21591	11.7271	2.6598	0.134422	0.452227	FCGR3A		NA		Not significant	Not significant	0.134422	Not significant
2.72788	11.3881	2.64824	0.135179	0.452227	FOXA1		NA		Not significant	Not significant	0.135179	Not significant
0.607445	8.40035	2.64081	0.135668	0.452227	ANGPT2		NA		Not significant	Not significant	0.135668	Not significant
0.768906	13.3755	2.59184	0.138949	0.452533	SMS		NA		Not significant	Not significant	0.138949	Not significant
-0.609819	10.0669	2.54038	0.142508	0.452533	MNDA		NA		Not significant	Not significant	0.142508	Not significant
-0.805952	13.1326	2.53994	0.142539	0.452533	LYZ		NA		Not significant	Not significant	0.142539	Not significant
-0.644661	8.89102	2.53205	0.143095	0.452533	RHOH		NA		Not significant	Not significant	0.143095	Not significant
0.794175	12.4058	2.51112	0.144583	0.452533	TMEM147		NA		Not significant	Not significant	0.144583	Not significant
-0.657784	12.1012	2.41516	0.151671	0.452533	CD4		NA		Not significant	Not significant	0.151671	Not significant
-0.612977	7.65201	2.40552	0.152407	0.452533	TCL1A		NA		Not significant	Not significant	0.152407	Not significant
-1.34521	10.3351	2.3956	0.15317	0.452533	MZB1		NA		Not significant	Not significant	0.15317	Not significant
0.814054	12.5221	2.38812	0.153749	0.452533	DST		NA		Not significant	Not significant	0.153749	Not significant
0.724578	11.0306	2.38439	0.154039	0.452533	MASTL		NA		Not significant	Not significant	0.154039	Not significant
-0.741774	9.83337	2.37026	0.155141	0.452533	SELL		NA		Not significant	Not significant	0.155141	Not significant
-0.558003	11.2118	2.35493	0.156349	0.452533	CD163		NA		Not significant	Not significant	0.156349	Not significant
0.702293	7.70443	2.3502	0.156725	0.452533	CXCL5		NA		Not significant	Not significant	0.156725	Not significant
-0.660898	5.20362	2.34947	0.156795	0.452533	GZMK		NA		Not significant	Not significant	0.156795	Not significant
0.879957	11.7818	2.29934	0.160835	0.452533	BASP1		NA		Not significant	Not significant	0.160835	Not significant
-1.51051	10.9854	2.29549	0.161153	0.452533	TCIM		NA		Not significant	Not significant	0.161153	Not significant
1.01178	11.764	2.28556	0.161973	0.452533	BACE2		NA		Not significant	Not significant	0.161973	Not significant
-0.532554	9.89819	2.27904	0.162516	0.452533	CD86		NA		Not significant	Not significant	0.162516	Not significant
0.55322	10.8363	2.26616	0.163592	0.452533	CRISPLD2		NA		Not significant	Not significant	0.163592	Not significant
-0.557549	7.81116	2.26081	0.164043	0.452533	CLECL1		NA		Not significant	Not significant	0.164043	Not significant
-0.831007	8.3551	2.25472	0.164557	0.452533	AQP3		NA		Not significant	Not significant	0.164557	Not significant
0.51938	7.7672	2.21744	0.167754	0.45751	ESM1		NA		Not significant	Not significant	0.167754	Not significant
-0.642032	11.4785	2.1936	0.16984	0.459404	FGL2		NA		Not significant	Not significant	0.16984	Not significant
1.19676	11.0913	2.15371	0.173408	0.464173	LYPD3		NA		Not significant	Not significant	0.173408	Not significant
-0.707642	9.03868	2.14263	0.174416	0.464173	TIGIT		NA		Not significant	Not significant	0.174416	Not significant
-0.605971	11.5103	2.10945	0.177483	0.468555	PECAM1		NA		Not significant	Not significant	0.177483	Not significant
-1.1351	9.36905	2.05519	0.18265	0.474997	NKG7		NA		Not significant	Not significant	0.18265	Not significant
-0.592033	11.9562	2.05009	0.183146	0.474997	CD68		NA		Not significant	Not significant	0.183146	Not significant
0.556764	12.4459	2.02249	0.185861	0.474997	SEC11C		NA		Not significant	Not significant	0.185861	Not significant
-0.755631	7.60436	2.01878	0.186229	0.474997	IFNG		NA		Not significant	Not significant	0.186229	Not significant
0.464441	7.01176	2.00986	0.18712	0.474997	TAC1		NA		Not significant	Not significant	0.18712	Not significant
-0.648755	9.78556	1.98379	0.189756	0.478012	CD247		NA		Not significant	Not significant	0.189756	Not significant
-0.789077	11.4264	1.88314	0.200409	0.501022	TRAC		NA		Not significant	Not significant	0.200409	Not significant
0.534651	6.9637	1.85734	0.203266	0.504345	TCEAL7		NA		Not significant	Not significant	0.203266	Not significant
0.482587	12.103	1.77306	0.212988	0.52278	CREBBP		NA		Not significant	Not significant	0.212988	Not significant
0.520162	6.80332	1.76116	0.214413	0.52278	DNAAF1		NA		Not significant	Not significant	0.214413	Not significant
0.616227	10.8431	1.74088	0.216864	0.52278	TRIB1		NA		Not significant	Not significant	0.216864	Not significant
1.62793	10.2016	1.7395	0.217033	0.52278	SCGB2A1		NA		Not significant	Not significant	0.217033	Not significant
0.555643	12.2106	1.66839	0.225951	0.537297	CCNB1		NA		Not significant	Not significant	0.225951	Not significant
0.481119	9.90882	1.64492	0.229003	0.537297	THAP2		NA		Not significant	Not significant	0.229003	Not significant
-0.560642	8.76838	1.63861	0.229833	0.537297	KLRC1		NA		Not significant	Not significant	0.229833	Not significant
-0.637854	8.95236	1.63445	0.230383	0.537297	CD69		NA		Not significant	Not significant	0.230383	Not significant
-0.579496	8.79386	1.61106	0.233505	0.537297	KLRB1		NA		Not significant	Not significant	0.233505	Not significant
0.58255	12.8135	1.58412	0.237173	0.537297	CTTN		NA		Not significant	Not significant	0.237173	Not significant
-0.66611	9.65672	1.57434	0.238524	0.537297	CD3G		NA		Not significant	Not significant	0.238524	Not significant
0.576046	7.9324	1.56798	0.239408	0.537297	SOX17		NA		Not significant	Not significant	0.239408	Not significant
-0.469015	10.7883	1.56336	0.240053	0.537297	HAVCR2		NA		Not significant	Not significant	0.240053	Not significant
0.513083	11.7333	1.55901	0.240663	0.537297	CCPG1		NA		Not significant	Not significant	0.240663	Not significant
-0.946236	9.48713	1.54483	0.242665	0.537297	ALDH1A3		NA		Not significant	Not significant	0.242665	Not significant
-0.770843	10.6201	1.54478	0.242671	0.537297	CCL5		NA		Not significant	Not significant	0.242671	Not significant
0.920052	11.6091	1.53388	0.244226	0.537297	KLF5		NA		Not significant	Not significant	0.244226	Not significant
0.547754	11.3134	1.50794	0.247981	0.53907	GLIPR1		NA		Not significant	Not significant	0.247981	Not significant
-0.782583	10.374	1.4574	0.255526	0.53907	GZMA		NA		Not significant	Not significant	0.255526	Not significant
0.440159	8.9467	1.45606	0.255731	0.53907	C2orf42		NA		Not significant	Not significant	0.255731	Not significant
0.603826	12.9419	1.43174	0.25948	0.53907	POSTN		NA		Not significant	Not significant	0.25948	Not significant
0.980274	13.4663	1.42259	0.26091	0.53907	CCND1		NA		Not significant	Not significant	0.26091	Not significant
0.517776	11.6885	1.417	0.261789	0.53907	RB1		NA		Not significant	Not significant	0.261789	Not significant
0.532595	9.60449	1.415	0.262104	0.53907	GFPT2		NA		Not significant	Not significant	0.262104	Not significant
-0.508258	6.20331	1.41333	0.262371	0.53907	CTSG		NA		Not significant	Not significant	0.262371	Not significant
0.742895	15.6775	1.40669	0.263419	0.53907	CD24		NA		Not significant	Not significant	0.263419	Not significant
0.56593	11.7396	1.40664	0.263428	0.53907	QARS		NA		Not significant	Not significant	0.263428	Not significant
-0.508411	11.9165	1.39601	0.265125	0.53907	CXCL12		NA		Not significant	Not significant	0.265125	Not significant
0.477306	11.3136	1.38133	0.267494	0.53907	ACTG2		NA		Not significant	Not significant	0.267494	Not significant
-0.490698	7.82069	1.3802	0.267678	0.53907	IL6		NA		Not significant	Not significant	0.267678	Not significant
0.760981	8.35959	1.37143	0.26911	0.53907	ADH1B		NA		Not significant	Not significant	0.26911	Not significant
0.822502	13.6519	1.36686	0.26986	0.53907	DSC2		NA		Not significant	Not significant	0.26986	Not significant
-0.437016	9.33118	1.35892	0.271169	0.53907	PDE4A		NA		Not significant	Not significant	0.271169	Not significant
-0.402233	7.58622	1.32114	0.277524	0.5484	CD80		NA		Not significant	Not significant	0.277524	Not significant
-0.506802	11.7872	1.30765	0.279843	0.549691	PTPRC		NA		Not significant	Not significant	0.279843	Not significant
0.80492	12.6886	1.28052	0.284592	0.555711	CD9		NA		Not significant	Not significant	0.284592	Not significant
-0.576685	5.96585	1.25902	0.288444	0.55992	PDCD1		NA		Not significant	Not significant	0.288444	Not significant
-0.685247	9.30369	1.2268	0.294336	0.568016	CD274		NA		Not significant	Not significant	0.294336	Not significant
0.446467	12.1382	1.19286	0.300739	0.577	LARS		NA		Not significant	Not significant	0.300739	Not significant
0.423002	11.5143	1.11651	0.31589	0.598738	MYLK		NA		Not significant	Not significant	0.31589	Not significant
1.94176	12.8589	1.11148	0.316927	0.598738	KRT6B		NA		Not significant	Not significant	0.316927	Not significant
0.484782	10.8502	1.10865	0.317512	0.598738	TRAF4		NA		Not significant	Not significant	0.317512	Not significant
0.765449	9.77986	1.08971	0.321471	0.602758	C15orf48		NA		Not significant	Not significant	0.321471	Not significant
0.529444	10.9781	1.06222	0.327345	0.607234	SH3YL1		NA		Not significant	Not significant	0.327345	Not significant
0.76817	8.84148	1.06133	0.327538	0.607234	NOSTRIN		NA		Not significant	Not significant	0.327538	Not significant
0.731655	14.1127	1.01874	0.336961	0.621214	KRT8		NA		Not significant	Not significant	0.336961	Not significant
0.367971	11.5853	0.999199	0.34142	0.624284	SEC24A		NA		Not significant	Not significant	0.34142	Not significant
-0.454134	8.72788	0.994913	0.34241	0.624284	APOBEC3A		NA		Not significant	Not significant	0.34241	Not significant
-0.448663	7.45372	0.980538	0.34576	0.626928	LILRA4		NA		Not significant	Not significant	0.34576	Not significant
-0.52377	8.78027	0.961069	0.350376	0.631825	KLRD1		NA		Not significant	Not significant	0.350376	Not significant
-0.523209	11.0689	0.931345	0.357603	0.641352	CD3E		NA		Not significant	Not significant	0.357603	Not significant
0.272418	6.32682	0.922973	0.359681	0.641511	CEACAM8		NA		Not significant	Not significant	0.359681	Not significant
0.506584	11.3052	0.915372	0.361579	0.641511	FAP		NA		Not significant	Not significant	0.361579	Not significant
-0.652857	13.0477	0.907225	0.363633	0.641706	CD47		NA		Not significant	Not significant	0.363633	Not significant
0.482683	9.97841	0.894187	0.366957	0.644127	LGALSL		NA		Not significant	Not significant	0.366957	Not significant
-0.453523	10.9746	0.862813	0.375149	0.651479	PIM1		NA		Not significant	Not significant	0.375149	Not significant
-0.32982	7.9031	0.859572	0.376011	0.651479	LY86		NA		Not significant	Not significant	0.376011	Not significant
0.467447	12.3547	0.855612	0.377068	0.651479	CDH1		NA		Not significant	Not significant	0.377068	Not significant
-0.50224	6.75412	0.844709	0.380004	0.653131	TPSAB1		NA		Not significant	Not significant	0.380004	Not significant
1.42667	11.6755	0.817448	0.3875	0.658781	MLPH		NA		Not significant	Not significant	0.3875	Not significant
0.437539	14.4089	0.810526	0.389439	0.658781	EPCAM		NA		Not significant	Not significant	0.389439	Not significant
-0.427778	11.1106	0.809724	0.389665	0.658781	SFRP4		NA		Not significant	Not significant	0.389665	Not significant
-0.357472	12.0758	0.804022	0.391276	0.658781	FCER1G		NA		Not significant	Not significant	0.391276	Not significant
-0.374001	8.64805	0.794856	0.393887	0.658892	HK3		NA		Not significant	Not significant	0.393887	Not significant
0.471572	11.4014	0.789815	0.395335	0.658892	E2F3		NA		Not significant	Not significant	0.395335	Not significant
0.378245	10.0281	0.772984	0.40023	0.663698	STXBP4		NA		Not significant	Not significant	0.40023	Not significant
0.518792	11.3013	0.751456	0.406631	0.669207	SDC4		NA		Not significant	Not significant	0.406631	Not significant
0.329881	8.14247	0.747033	0.407967	0.669207	SNAI1		NA		Not significant	Not significant	0.407967	Not significant
-0.571179	10.67	0.741537	0.409636	0.669207	IDO1		NA		Not significant	Not significant	0.409636	Not significant
-0.623029	11.4208	0.734723	0.41172	0.669299	EGFR		NA		Not significant	Not significant	0.41172	Not significant
0.629716	11.8489	0.722165	0.415607	0.669735	AQP1		NA		Not significant	Not significant	0.415607	Not significant
-0.628727	10.8177	0.720013	0.416278	0.669735	APOBEC3B		NA		Not significant	Not significant	0.416278	Not significant
-0.367551	10.6134	0.714279	0.418077	0.669735	LPXN		NA		Not significant	Not significant	0.418077	Not significant
0.399187	11.2491	0.703404	0.421524	0.671994	PDGFRB		NA		Not significant	Not significant	0.421524	Not significant
0.420541	10.2924	0.677667	0.429865	0.681998	MKI67		NA		Not significant	Not significant	0.429865	Not significant
0.341131	10.6775	0.663174	0.434682	0.686341	CAV1		NA		Not significant	Not significant	0.434682	Not significant
0.49016	13.1035	0.62933	0.446284	0.701304	NFKBIA		NA		Not significant	Not significant	0.446284	Not significant
-0.31493	10.2112	0.622121	0.448822	0.70195	GPR183		NA		Not significant	Not significant	0.448822	Not significant
-0.270429	10.5866	0.592472	0.459521	0.714827	SERPINB9		NA		Not significant	Not significant	0.459521	Not significant
0.298421	10.1831	0.587416	0.461388	0.714827	CD93		NA		Not significant	Not significant	0.461388	Not significant
-1.03341	11.6806	0.554871	0.473727	0.730514	KRT23		NA		Not significant	Not significant	0.473727	Not significant
0.289532	7.67512	0.543792	0.478059	0.733765	AKR1C3		NA		Not significant	Not significant	0.478059	Not significant
0.340343	9.40417	0.534507	0.481743	0.735255	RAMP2		NA		Not significant	Not significant	0.481743	Not significant
-0.290881	10.5825	0.530156	0.483486	0.735255	IL7R		NA		Not significant	Not significant	0.483486	Not significant
-0.4367	11.0317	0.520166	0.487532	0.738007	CD8A		NA		Not significant	Not significant	0.487532	Not significant
0.373488	12.919	0.488838	0.500617	0.750551	COL6A3		NA		Not significant	Not significant	0.500617	Not significant
0.422533	11.8567	0.485813	0.501914	0.750551	CXCR4		NA		Not significant	Not significant	0.501914	Not significant
-0.247194	10.2921	0.484123	0.502642	0.750551	ITGAX		NA		Not significant	Not significant	0.502642	Not significant
0.324117	10.1223	0.453792	0.51603	0.763173	C6orf132		NA		Not significant	Not significant	0.51603	Not significant
0.310303	13.1092	0.451567	0.517038	0.763173	ENAH		NA		Not significant	Not significant	0.517038	Not significant
-0.300294	11.7427	0.446013	0.519571	0.763173	VOPP1		NA		Not significant	Not significant	0.519571	Not significant
-0.308251	10.9049	0.444325	0.520345	0.763173	RTKN2		NA		Not significant	Not significant	0.520345	Not significant
0.915202	13.7482	0.43665	0.523893	0.764636	KRT5		NA		Not significant	Not significant	0.523893	Not significant
0.531788	15.0037	0.424251	0.529722	0.764636	KRT7		NA		Not significant	Not significant	0.529722	Not significant
-0.246669	10.9889	0.424121	0.529783	0.764636	TMEM173		NA		Not significant	Not significant	0.529783	Not significant
-0.245161	11.8705	0.414688	0.534302	0.764636	ZEB2		NA		Not significant	Not significant	0.534302	Not significant
0.236693	8.80333	0.414231	0.534523	0.764636	MMRN2		NA		Not significant	Not significant	0.534523	Not significant
-0.313329	7.82099	0.400984	0.541	0.764636	IL2RA		NA		Not significant	Not significant	0.541	Not significant
-0.223954	7.981	0.400253	0.541362	0.764636	ESR1		NA		Not significant	Not significant	0.541362	Not significant
0.263449	9.42668	0.399988	0.541493	0.764636	CLEC14A		NA		Not significant	Not significant	0.541493	Not significant
0.246167	6.99388	0.39857	0.542197	0.764636	SOX18		NA		Not significant	Not significant	0.542197	Not significant
-0.26684	12.606	0.333649	0.576479	0.804643	TRAPPC3		NA		Not significant	Not significant	0.576479	Not significant
-0.22291	7.79973	0.333241	0.576709	0.804643	CLIC6		NA		Not significant	Not significant	0.576709	Not significant
-0.444879	12.2745	0.331163	0.57788	0.804643	CXCL9		NA		Not significant	Not significant	0.57788	Not significant
0.277339	10.7427	0.315964	0.586602	0.812875	ADAM12		NA		Not significant	Not significant	0.586602	Not significant
-0.308513	11.1886	0.304496	0.593371	0.812875	CXCL16		NA		Not significant	Not significant	0.593371	Not significant
0.633919	14.6022	0.302422	0.594613	0.812875	TACSTD2		NA		Not significant	Not significant	0.594613	Not significant
-0.453905	7.91561	0.301948	0.594898	0.812875	MMP12		NA		Not significant	Not significant	0.594898	Not significant
-0.312424	9.19759	0.299938	0.596109	0.812875	CTLA4		NA		Not significant	Not significant	0.596109	Not significant
-0.194602	8.98638	0.29233	0.600739	0.815819	IGF1		NA		Not significant	Not significant	0.600739	Not significant
0.210242	10.1924	0.268452	0.615806	0.827916	ZEB1		NA		Not significant	Not significant	0.615806	Not significant
-0.207524	12.1857	0.260781	0.62083	0.827916	WARS		NA		Not significant	Not significant	0.62083	Not significant
-0.301916	12.4198	0.257672	0.622893	0.827916	ITM2C		NA		Not significant	Not significant	0.622893	Not significant
-0.163913	7.46382	0.256723	0.623526	0.827916	PGR		NA		Not significant	Not significant	0.623526	Not significant
0.337924	11.0141	0.25421	0.625209	0.827916	CCNA2		NA		Not significant	Not significant	0.625209	Not significant
-0.219312	7.50366	0.245661	0.631015	0.827916	PLD4		NA		Not significant	Not significant	0.631015	Not significant
0.201113	11.3003	0.245341	0.631234	0.827916	TGFB1		NA		Not significant	Not significant	0.631234	Not significant
-0.174237	11.3785	0.242706	0.633052	0.827916	SMAP2		NA		Not significant	Not significant	0.633052	Not significant
0.383652	10.7926	0.237007	0.637024	0.827916	MAP3K8		NA		Not significant	Not significant	0.637024	Not significant
0.220059	11.0272	0.236119	0.637648	0.827916	EEF2K		NA		Not significant	Not significant	0.637648	Not significant
-0.270488	9.62401	0.235254	0.638258	0.827916	DUSP5		NA		Not significant	Not significant	0.638258	Not significant
-0.202153	12.4526	0.225896	0.644944	0.827916	HMGA1		NA		Not significant	Not significant	0.644944	Not significant
-0.287973	8.96784	0.224627	0.645864	0.827916	STC1		NA		Not significant	Not significant	0.645864	Not significant
0.195746	9.14368	0.22421	0.646168	0.827916	PPARG		NA		Not significant	Not significant	0.646168	Not significant
-0.219702	7.70254	0.220409	0.648946	0.827916	CPA3		NA		Not significant	Not significant	0.648946	Not significant
0.17465	12.5999	0.219263	0.649789	0.827916	TOMM7		NA		Not significant	Not significant	0.649789	Not significant
0.224052	11.6936	0.210294	0.656486	0.833232	SLC5A6		NA		Not significant	Not significant	0.656486	Not significant
0.225952	12.7237	0.20305	0.662024	0.836657	PTEN		NA		Not significant	Not significant	0.662024	Not significant
0.454859	8.48876	0.194846	0.668443	0.836657	NDUFA4L2		NA		Not significant	Not significant	0.668443	Not significant
-0.255304	7.35312	0.194702	0.668557	0.836657	FCER1A		NA		Not significant	Not significant	0.668557	Not significant
-0.306406	10.0437	0.19187	0.670812	0.836657	CCNE1		NA		Not significant	Not significant	0.670812	Not significant
0.159818	11.2343	0.19056	0.671861	0.836657	ERN1		NA		Not significant	Not significant	0.671861	Not significant
0.170163	6.5053	0.18742	0.674397	0.836657	CAVIN2		NA		Not significant	Not significant	0.674397	Not significant
0.274058	13.3229	0.180709	0.679899	0.840325	TPD52		NA		Not significant	Not significant	0.679899	Not significant
-0.569579	12.7997	0.17537	0.684365	0.842688	SERPINA3		NA		Not significant	Not significant	0.684365	Not significant
0.190204	11.8285	0.166785	0.691719	0.845918	ATM		NA		Not significant	Not significant	0.691719	Not significant
-0.200012	8.82428	0.16633	0.692115	0.845918	CCR7		NA		Not significant	Not significant	0.692115	Not significant
-0.249685	12.0168	0.159161	0.698439	0.84787	S100A4		NA		Not significant	Not significant	0.698439	Not significant
-0.160978	11.1124	0.158702	0.69885	0.84787	DNTTIP1		NA		Not significant	Not significant	0.69885	Not significant
-0.176413	7.72301	0.142723	0.7136	0.860572	HOXD9		NA		Not significant	Not significant	0.7136	Not significant
-0.184606	8.05528	0.139663	0.716532	0.860572	CX3CR1		NA		Not significant	Not significant	0.716532	Not significant
-0.232091	11.4254	0.13903	0.717143	0.860572	FBLN1		NA		Not significant	Not significant	0.717143	Not significant
0.223572	11.4651	0.134341	0.721721	0.862928	MYO5B		NA		Not significant	Not significant	0.721721	Not significant
-0.221158	11.9169	0.128197	0.72786	0.867126	MMP2		NA		Not significant	Not significant	0.72786	Not significant
0.173001	12.5576	0.122437	0.73377	0.868141	CCDC6		NA		Not significant	Not significant	0.73377	Not significant
-0.182766	11.4848	0.122241	0.733974	0.868141	SVIL		NA		Not significant	Not significant	0.733974	Not significant
-0.155932	11.7781	0.115051	0.741584	0.87401	CCDC80		NA		Not significant	Not significant	0.741584	Not significant
0.260531	12.9934	0.109077	0.748112	0.874541	LDHB		NA		Not significant	Not significant	0.748112	Not significant
-0.131527	16.206	0.108095	0.749205	0.874541	B2M		NA		Not significant	Not significant	0.749205	Not significant
-0.144546	8.76971	0.107396	0.749985	0.874541	FOXP3		NA		Not significant	Not significant	0.749985	Not significant
-0.111374	5.38225	0.093114	0.766606	0.88917	UCP1		NA		Not significant	Not significant	0.766606	Not significant
0.112592	8.07926	0.0920312	0.767919	0.88917	ANKRD29		NA		Not significant	Not significant	0.767919	Not significant
0.206381	10.1993	0.0898046	0.770652	0.889214	CDC42EP1		NA		Not significant	Not significant	0.770652	Not significant
-0.121611	14.5667	0.0732846	0.792199	0.910891	PKM		NA		Not significant	Not significant	0.792199	Not significant
-0.129819	10.9315	0.0657706	0.802873	0.915374	CD83		NA		Not significant	Not significant	0.802873	Not significant
-0.161112	12.1922	0.0622778	0.808057	0.915374	SQLE		NA		Not significant	Not significant	0.808057	Not significant
0.122529	10.8353	0.0617625	0.808835	0.915374	PELI1		NA		Not significant	Not significant	0.808835	Not significant
0.109029	10.8596	0.0590195	0.813035	0.915374	PDGFRA		NA		Not significant	Not significant	0.813035	Not significant
0.136594	10.8919	0.0561421	0.817554	0.915374	TCF4		NA		Not significant	Not significant	0.817554	Not significant
0.264143	8.55624	0.0561221	0.817586	0.915374	RORC		NA		Not significant	Not significant	0.817586	Not significant
-0.126774	8.31763	0.0558556	0.818011	0.915374	GNLY		NA		Not significant	Not significant	0.818011	Not significant
-0.126508	9.85609	0.0556049	0.818412	0.915374	LPL		NA		Not significant	Not significant	0.818412	Not significant
0.0822841	10.8255	0.0530269	0.822588	0.915374	OCIAD2		NA		Not significant	Not significant	0.822588	Not significant
0.0909196	10.2852	0.0522689	0.823836	0.915374	TIFA		NA		Not significant	Not significant	0.823836	Not significant
0.0982574	7.71037	0.0485283	0.830142	0.919284	RAPGEF3		NA		Not significant	Not significant	0.830142	Not significant
-0.11439	11.3353	0.0416491	0.842444	0.920903	EIF4EBP1		NA		Not significant	Not significant	0.842444	Not significant
-0.0833373	9.48592	0.0413687	0.842967	0.920903	FAM49A		NA		Not significant	Not significant	0.842967	Not significant
-0.146224	11.2517	0.0410506	0.843563	0.920903	S100A14		NA		Not significant	Not significant	0.843563	Not significant
0.13733	12.1165	0.0381765	0.84906	0.920903	SCD		NA		Not significant	Not significant	0.84906	Not significant
0.139511	9.6107	0.0352622	0.854858	0.920903	LRRC15		NA		Not significant	Not significant	0.854858	Not significant
0.0801669	8.93297	0.0349448	0.855504	0.920903	DUSP2		NA		Not significant	Not significant	0.855504	Not significant
0.0895927	12.0284	0.0345248	0.856364	0.920903	CDC25B		NA		Not significant	Not significant	0.856364	Not significant
-0.0984087	10.1803	0.0344264	0.856567	0.920903	AURKB		NA		Not significant	Not significant	0.856567	Not significant
0.104328	13.2042	0.0343523	0.856719	0.920903	LUM		NA		Not significant	Not significant	0.856719	Not significant
0.163505	9.70586	0.0269934	0.872819	0.935163	TUBB2B		NA		Not significant	Not significant	0.872819	Not significant
0.0522479	10.2801	0.0239766	0.88007	0.937061	KARS		NA		Not significant	Not significant	0.88007	Not significant
0.054181	9.67557	0.0237531	0.880626	0.937061	PTRHD1		NA		Not significant	Not significant	0.880626	Not significant
0.0703389	11.224	0.0227669	0.883109	0.937061	AURKA		NA		Not significant	Not significant	0.883109	Not significant
0.064072	8.78057	0.0182802	0.895173	0.946817	HOXD8		NA		Not significant	Not significant	0.895173	Not significant
0.0886308	12.6039	0.015603	0.903105	0.946919	ADAM9		NA		Not significant	Not significant	0.903105	Not significant
-0.0722463	12.9167	0.013784	0.908898	0.946919	FLNB		NA		Not significant	Not significant	0.908898	Not significant
0.118707	9.71597	0.0135145	0.909788	0.946919	C5orf46		NA		Not significant	Not significant	0.909788	Not significant
0.0449899	11.8605	0.0133105	0.910468	0.946919	FAM107B		NA		Not significant	Not significant	0.910468	Not significant
0.0723272	11.6526	0.0127997	0.912195	0.946919	TUBA4A		NA		Not significant	Not significant	0.912195	Not significant
-0.0519858	9.14917	0.0127148	0.912485	0.946919	TNF		NA		Not significant	Not significant	0.912485	Not significant
0.070586	9.20739	0.0111058	0.918186	0.949847	DMKN		NA		Not significant	Not significant	0.918186	Not significant
-0.032403	12.6774	0.00725459	0.933829	0.959322	HIF1A		NA		Not significant	Not significant	0.933829	Not significant
0.0371321	10.6898	0.00694216	0.935266	0.959322	ANKRD28		NA		Not significant	Not significant	0.935266	Not significant
-0.106852	12.005	0.00611717	0.939225	0.959322	SLPI		NA		Not significant	Not significant	0.939225	Not significant
-0.032938	11.9263	0.00605995	0.939509	0.959322	CDKN1A		NA		Not significant	Not significant	0.939509	Not significant
-0.0356976	9.10426	0.00559325	0.94188	0.959322	TCF7		NA		Not significant	Not significant	0.94188	Not significant
-0.0446809	13.1935	0.00197894	0.965406	0.980259	SFRP1		NA		Not significant	Not significant	0.965406	Not significant
0.0202193	11.8471	0.00102147	0.975142	0.987107	CDC20		NA		Not significant	Not significant	0.975142	Not significant
0.00857871	12.4993	0.000610167	0.980786	0.989784	MDM2		NA		Not significant	Not significant	0.980786	Not significant
0.00861333	9.70636	0.000195716	0.989117	0.995148	FSTL3		NA		Not significant	Not significant	0.989117	Not significant
-0.00126859	10.2316	1.21457e-05	0.997289	0.998784	RAB30		NA		Not significant	Not significant	0.997289	Not significant
-0.000636298	10.2985	2.44415e-06	0.998784	0.998784	VWF		NA		Not significant	Not significant	0.998784	Not significant
5.39639	11.8713	9.33294	0.0123498	0.442419	ANKRD30A	*	NA	*	Up in non-responder (p<0.05)	Not significant	0.0123498	Up in non-responder (p<0.05)
2.83623	10.8514	8.94104	0.0137846	0.442419	PTN	*	NA	*	Up in non-responder (p<0.06)	Not significant	0.0137846	Up in non-responder (p<0.06)
1.13612	9.79577	8.1877	0.0171567	0.442419	CDC14B	*	NA	*	Up in non-responder (p<0.07)	Not significant	0.0171567	Up in non-responder (p<0.07)
3.34435	13.0859	8.09069	0.0176607	0.442419	KRT14	*	NA	*	Up in non-responder (p<0.08)	Not significant	0.0176607	Up in non-responder (p<0.08)
3.51611	8.58626	8.00552	0.0181197	0.442419	ABCC11	*	NA	*	Up in non-responder (p<0.09)	Not significant	0.0181197	Up in non-responder (p<0.09)
2.49088	12.2461	7.6057	0.0204678	0.442419	GATA3	*	NA	*	Up in non-responder (p<0.10)	Not significant	0.0204678	Up in non-responder (p<0.10)
2.32169	8.54723	7.03463	0.0245048	0.442419	CCNA1	*	NA	*	Up in non-responder (p<0.11)	Not significant	0.0245048	Up in non-responder (p<0.11)
5.51522	12.3328	6.87301	0.0258197	0.442419	MUC6	*	NA	*	Up in non-responder (p<0.12)	Not significant	0.0258197	Up in non-responder (p<0.12)
1.55645	7.6259	6.71255	0.0272114	0.442419	TIMP4	*	NA	*	Up in non-responder (p<0.13)	Not significant	0.0272114	Up in non-responder (p<0.13)
4.88679	12.8478	5.94906	0.0352406	0.442419	S100A8	*	NA	*	Up in non-responder (p<0.14)	Not significant	0.0352406	Up in non-responder (p<0.14)
1.0353	12.9514	5.93353	0.0354321	0.442419	NARS	*	NA	*	Up in non-responder (p<0.15)	Not significant	0.0354321	Up in non-responder (p<0.15)
3.8247	11.6683	5.62509	0.0395131	0.442419	MYBPC1	*	NA	*	Up in non-responder (p<0.16)	Not significant	0.0395131	Up in non-responder (p<0.16)
1.14802	12.4889	5.5934	0.0399642	0.442419	WEE1	*	NA	*	Up in non-responder (p<0.17)	Not significant	0.0399642	Up in non-responder (p<0.17)
0.964295	11.8758	5.53514	0.0408104	0.442419	ZNF562	*	NA	*	Up in non-responder (p<0.18)	Not significant	0.0408104	Up in non-responder (p<0.18)
0.987635	9.36467	5.4106	0.0426943	0.442419	KDR	*	NA	*	Up in non-responder (p<0.19)	Not significant	0.0426943	Up in non-responder (p<0.19)
0.906848	9.60449	5.32383	0.0440704	0.442419	DAPK3	*	NA	*	Up in non-responder (p<0.20)	Not significant	0.0440704	Up in non-responder (p<0.20)
1.00463	7.77357	5.10419	0.0478054	0.442419	CTH	*	NA	*	Up in non-responder (p<0.21)	Not significant	0.0478054	Up in non-responder (p<0.21)
2.11835	12.6131	5.05771	0.0486451	0.442419	FASN	*	NA	*	Up in non-responder (p<0.22)	Not significant	0.0486451	Up in non-responder (p<0.22)
1.49684	9.90297	11.5722	0.006894	0.442419	DCLK1	**	NA	**	Up in non-responder (p<0.05)	Not significant	0.006894	Up in non-responder (p<0.23)
