# Supplementary material
Source: Research Square preprint supplement (doi:10.21203/rs.3.rs-9572543/v1)
Supplement: Supplementary file 7 [file 4810eb91549c6dd91dad1384.xlsx]

## Sheet: TableS11
source	target	ligand	receptor	prob	pval	interaction_name	interaction_name_2	pathway_name	annotation	evidence	group	FDR
Breast glandular cells	Adipocytes	VEGFA	KDR	0.13209	0	VEGFA_VEGFR2	VEGFA - VEGFR2	VEGF	Secreted Signaling	KEGG: hsa04370; PMID: 16633338	responder	0
Breast glandular cells	Endothelial cells	VEGFA	KDR	0.0489077	0	VEGFA_VEGFR2	VEGFA - VEGFR2	VEGF	Secreted Signaling	KEGG: hsa04370; PMID: 16633338	responder	0
Adipocytes	T cells	CXCL12	CXCR4	0.0396963	0	CXCL12_CXCR4	CXCL12 - CXCR4	CXCL	Secreted Signaling	KEGG: hsa04060	responder	0
Breast cancer	T cells	CXCL12	CXCR4	0.0347777	0	CXCL12_CXCR4	CXCL12 - CXCR4	CXCL	Secreted Signaling	KEGG: hsa04060	responder	0
Endothelial cells	T cells	CXCL12	CXCR4	0.0351072	0	CXCL12_CXCR4	CXCL12 - CXCR4	CXCL	Secreted Signaling	KEGG: hsa04060	responder	0
Fibroblasts	T cells	CXCL12	CXCR4	0.0405837	0	CXCL12_CXCR4	CXCL12 - CXCR4	CXCL	Secreted Signaling	KEGG: hsa04060	responder	0
Dendritic cells	Macrophages	PTPRC	MRC1	0.0539488	0	PTPRC_MRC1	PTPRC - MRC1	CD45	Cell-Cell Contact	PMID: 27601670; PMID: 10575006	responder	0
Macrophages	Macrophages	PTPRC	MRC1	0.0442089	0	PTPRC_MRC1	PTPRC - MRC1	CD45	Cell-Cell Contact	PMID: 27601670; PMID: 10575006	responder	0
NK cells	Macrophages	PTPRC	MRC1	0.0543261	0	PTPRC_MRC1	PTPRC - MRC1	CD45	Cell-Cell Contact	PMID: 27601670; PMID: 10575006	responder	0
T cells	Macrophages	PTPRC	MRC1	0.0490563	0	PTPRC_MRC1	PTPRC - MRC1	CD45	Cell-Cell Contact	PMID: 27601670; PMID: 10575006	responder	0
Breast glandular cells	Breast glandular cells	CDH1	CDH1	0.0371675	0	CDH1_CDH1	CDH1 - CDH1	CDH	Cell-Cell Contact	KEGG: hsa04514	responder	0
Adipocytes	Adipocytes	PECAM1	PECAM1	0.371047	0	PECAM1_PECAM1	PECAM1 - PECAM1	PECAM1	Cell-Cell Contact	KEGG: hsa04514	responder	0
B cells	Adipocytes	PECAM1	PECAM1	0.334791	0	PECAM1_PECAM1	PECAM1 - PECAM1	PECAM1	Cell-Cell Contact	KEGG: hsa04514	responder	0
Endothelial cells	Adipocytes	PECAM1	PECAM1	0.443833	0	PECAM1_PECAM1	PECAM1 - PECAM1	PECAM1	Cell-Cell Contact	KEGG: hsa04514	responder	0
Adipocytes	B cells	PECAM1	PECAM1	0.334791	0	PECAM1_PECAM1	PECAM1 - PECAM1	PECAM1	Cell-Cell Contact	KEGG: hsa04514	responder	0
B cells	B cells	PECAM1	PECAM1	0.300385	0	PECAM1_PECAM1	PECAM1 - PECAM1	PECAM1	Cell-Cell Contact	KEGG: hsa04514	responder	0
Endothelial cells	B cells	PECAM1	PECAM1	0.405045	0	PECAM1_PECAM1	PECAM1 - PECAM1	PECAM1	Cell-Cell Contact	KEGG: hsa04514	responder	0
Adipocytes	Endothelial cells	PECAM1	PECAM1	0.443833	0	PECAM1_PECAM1	PECAM1 - PECAM1	PECAM1	Cell-Cell Contact	KEGG: hsa04514	responder	0
B cells	Endothelial cells	PECAM1	PECAM1	0.405045	0	PECAM1_PECAM1	PECAM1 - PECAM1	PECAM1	Cell-Cell Contact	KEGG: hsa04514	responder	0
Endothelial cells	Endothelial cells	PECAM1	PECAM1	0.519113	0	PECAM1_PECAM1	PECAM1 - PECAM1	PECAM1	Cell-Cell Contact	KEGG: hsa04514	responder	0
Breast glandular cells	Adipocytes	VEGFA	KDR	0.133489	0	VEGFA_VEGFR2	VEGFA - VEGFR2	VEGF	Secreted Signaling	KEGG: hsa04370; PMID: 16633338	non-responder	0
Breast glandular cells	Endothelial cells	VEGFA	KDR	0.0498211	0	VEGFA_VEGFR2	VEGFA - VEGFR2	VEGF	Secreted Signaling	KEGG: hsa04370; PMID: 16633338	non-responder	0
Adipocytes	T cells	CXCL12	CXCR4	0.0398784	0	CXCL12_CXCR4	CXCL12 - CXCR4	CXCL	Secreted Signaling	KEGG: hsa04060	non-responder	0
Fibroblasts	T cells	CXCL12	CXCR4	0.0495732	0	CXCL12_CXCR4	CXCL12 - CXCR4	CXCL	Secreted Signaling	KEGG: hsa04060	non-responder	0
Breast glandular cells	Breast glandular cells	CDH1	CDH1	0.0307901	0	CDH1_CDH1	CDH1 - CDH1	CDH	Cell-Cell Contact	KEGG: hsa04514	non-responder	0
NK cells	NK cells	NCAM1	NCAM1	0.0130013	0	NCAM1_NCAM1	NCAM1 - NCAM1	NCAM	Cell-Cell Contact	KEGG: hsa04514	non-responder	0
Adipocytes	Adipocytes	PECAM1	PECAM1	0.348413	0	PECAM1_PECAM1	PECAM1 - PECAM1	PECAM1	Cell-Cell Contact	KEGG: hsa04514	non-responder	0
B cells	Adipocytes	PECAM1	PECAM1	0.145916	0	PECAM1_PECAM1	PECAM1 - PECAM1	PECAM1	Cell-Cell Contact	KEGG: hsa04514	non-responder	0
Endothelial cells	Adipocytes	PECAM1	PECAM1	0.433871	0	PECAM1_PECAM1	PECAM1 - PECAM1	PECAM1	Cell-Cell Contact	KEGG: hsa04514	non-responder	0
Adipocytes	B cells	PECAM1	PECAM1	0.145916	0	PECAM1_PECAM1	PECAM1 - PECAM1	PECAM1	Cell-Cell Contact	KEGG: hsa04514	non-responder	0
B cells	B cells	PECAM1	PECAM1	0.0517605	0	PECAM1_PECAM1	PECAM1 - PECAM1	PECAM1	Cell-Cell Contact	KEGG: hsa04514	non-responder	0
Endothelial cells	B cells	PECAM1	PECAM1	0.196699	0	PECAM1_PECAM1	PECAM1 - PECAM1	PECAM1	Cell-Cell Contact	KEGG: hsa04514	non-responder	0
Adipocytes	Endothelial cells	PECAM1	PECAM1	0.433871	0	PECAM1_PECAM1	PECAM1 - PECAM1	PECAM1	Cell-Cell Contact	KEGG: hsa04514	non-responder	0
B cells	Endothelial cells	PECAM1	PECAM1	0.196699	0	PECAM1_PECAM1	PECAM1 - PECAM1	PECAM1	Cell-Cell Contact	KEGG: hsa04514	non-responder	0
Endothelial cells	Endothelial cells	PECAM1	PECAM1	0.52345	0	PECAM1_PECAM1	PECAM1 - PECAM1	PECAM1	Cell-Cell Contact	KEGG: hsa04514	non-responder	0
