# Supplementary material
Source: Research Square preprint supplement (doi:10.21203/rs.3.rs-9572543/v1)
Supplement: Supplementary file 8 [file 51f1c3425f62aff3986688eb.xlsx]

## Sheet: TableS8
Gene	cell_type	n_CTxP	n_CTxnP	pct_CTxP	pct_CTxnP	pct_diff	prop_test_pvalue	fisher_pvalue	fisher_OR	chisq_pvalue	prop_test_FDR	fisher_FDR	significance
CD247	Adipocytes	15	16	0.04	0.09	-0.05	0.0584309	0.0554884	0.480865	5.1621e-211	0.0800135	0.0949143
CD247	B cells	462	66	1.38	0.38	1	2.42768e-25	1.47065e-29	3.62842	5.1621e-211	6.58941e-25	5.121e-29	***
CD247	Breast cancer	576	387	1.72	2.25	-0.53	3.83312e-05	4.2353e-05	0.759689	5.1621e-211	6.85452e-05	9.83194e-05	***
CD247	Breast glandular cells	5066	4282	15.13	24.93	-9.79	3.30186e-159	4.4025e-154	0.537064	5.1621e-211	1.79244e-158	3.066e-153	***
CD247	Breast myoepithelial cells	20	38	0.06	0.22	-0.16	7.49214e-07	1.05103e-06	0.269634	5.1621e-211	1.42351e-06	2.5619e-06	***
CD247	Dendritic cells	5	2	0.01	0.01	0	1	1	1.28302	5.1621e-211	1	1
CD247	Endothelial cells	32	8	0.1	0.05	0.05	0.0905565	0.0669932	2.05368	5.1621e-211	0.119692	0.109779
CD247	Epithelial cells	0	3	0	0.02	-0.02	NA	0.0390012	0	5.1621e-211	NA	0.0691385	†
CD247	Fibroblasts	1061	609	3.17	3.55	-0.38	0.0267599	0.0254979	0.890591	5.1621e-211	0.0383727	0.046038	*
CD247	Macrophages	2112	585	6.31	3.41	2.9	4.4775e-43	3.89734e-46	1.91009	5.1621e-211	1.30881e-42	1.4615e-45	***
CD247	Mast cells	0	0	0	0	0	NA	1	0	5.1621e-211	NA	1
CD247	Monocytes	0	0	0	0	0	NA	1	0	5.1621e-211	NA	1
CD247	NK cells	31	12	0.09	0.07	0.02	0.502066	0.519416	1.32602	5.1621e-211	0.57379	0.689021
CD247	Smooth muscle cells	25	19	0.07	0.11	-0.04	0.254344	0.204279	0.67497	5.1621e-211	0.311776	0.306418
CD247	T cells	24069	11151	71.9	64.91	6.99	8.34657e-59	3.35049e-58	1.38315	5.1621e-211	2.95041e-58	1.51941e-57	***
CD3E	Adipocytes	25	15	0.04	0.04	-0.01	0.808852	0.73972	0.875222	1.0862e-268	0.853789	0.936659
CD3E	B cells	872	91	1.29	0.26	1.03	3.73381e-60	2.28008e-73	5.08555	1.0862e-268	1.38424e-59	1.17004e-72	***
CD3E	Breast cancer	919	731	1.36	2.06	-0.7	2.25225e-17	7.73938e-17	0.655522	1.0862e-268	5.187e-17	2.28664e-16	***
CD3E	Breast glandular cells	9900	7507	14.62	21.12	-6.49	2.45831e-154	1.7978e-150	0.639879	1.0862e-268	1.28849e-153	1.2089e-149	***
CD3E	Breast myoepithelial cells	44	59	0.06	0.17	-0.1	1.76156e-06	3.28096e-06	0.391248	1.0862e-268	3.30564e-06	7.70828e-06	***
CD3E	Dendritic cells	2	1	0	0	0	NA	1	1.05032	1.0862e-268	NA	1
CD3E	Endothelial cells	62	14	0.09	0.04	0.05	0.00483065	0.00343317	2.32689	1.0862e-268	0.00772905	0.00704703	**
CD3E	Epithelial cells	1	1	0	0	0	NA	1	0.525134	1.0862e-268	NA	1
CD3E	Fibroblasts	2457	1447	3.63	4.07	-0.44	0.000446924	0.000459444	0.887641	1.0862e-268	0.00077196	0.00101809	**
CD3E	Macrophages	4120	1316	6.09	3.7	2.38	1.26427e-59	6.35021e-63	1.68584	1.0862e-268	4.57544e-59	3.02022e-62	***
CD3E	Mast cells	0	0	0	0	0	NA	1	0	1.0862e-268	NA	1
CD3E	Monocytes	0	0	0	0	0	NA	1	0	1.0862e-268	NA	1
CD3E	NK cells	7	1	0.01	0	0.01	0.350511	0.277316	3.67632	1.0862e-268	0.413006	0.403557
CD3E	Smooth muscle cells	38	40	0.06	0.11	-0.06	0.00258009	0.00263791	0.498607	1.0862e-268	0.00426275	0.00553111	**
CD3E	T cells	49249	24328	72.75	68.43	4.32	4.75908e-48	1.07374e-47	1.23159	1.0862e-268	1.50704e-47	4.10548e-47	***
CD3G	Adipocytes	13	8	0.04	0.05	-0.01	0.767551	0.643495	0.789122	2.39125e-84	0.821604	0.825536
CD3G	B cells	326	30	1.02	0.19	0.82	2.05237e-22	1.33732e-27	5.32168	2.39125e-84	4.95174e-22	4.49615e-27	***
CD3G	Breast cancer	383	234	1.19	1.5	-0.31	0.00600232	0.00569045	0.792434	2.39125e-84	0.00950367	0.0115587	*
CD3G	Breast glandular cells	4555	3048	14.21	19.58	-5.37	8.24076e-51	1.36181e-49	0.680327	2.39125e-84	2.6651e-50	5.41944e-49	***
CD3G	Breast myoepithelial cells	16	16	0.05	0.1	-0.05	0.0574609	0.0571018	0.485387	2.39125e-84	0.0794006	0.0968248
CD3G	Dendritic cells	1	0	0	0	0	NA	1	Inf	2.39125e-84	NA	1
CD3G	Endothelial cells	33	7	0.1	0.04	0.06	0.0600772	0.04283	2.29078	2.39125e-84	0.0815333	0.07457	†
CD3G	Epithelial cells	2	4	0.01	0.03	-0.02	0.180508	0.093886	0.242787	2.39125e-84	0.224895	0.150064
CD3G	Fibroblasts	853	492	2.66	3.16	-0.5	0.00224168	0.00237703	0.837686	2.39125e-84	0.00374435	0.00503828	**
CD3G	Macrophages	1514	431	4.72	2.77	1.95	6.4978e-24	2.12523e-25	1.74095	2.39125e-84	1.67401e-23	6.907e-25	***
CD3G	Mast cells	0	0	0	0	0	NA	1	0	2.39125e-84	NA	1
CD3G	Monocytes	0	0	0	0	0	NA	1	0	2.39125e-84	NA	1
CD3G	NK cells	1	0	0	0	0	NA	1	Inf	2.39125e-84	NA	1
CD3G	Smooth muscle cells	16	10	0.05	0.06	-0.01	0.675565	0.534768	0.776958	2.39125e-84	0.73347	0.698533
CD3G	T cells	24341	11287	75.94	72.51	3.43	6.42121e-16	8.38689e-16	1.19667	2.39125e-84	1.43533e-15	2.40506e-15	***
CD8A	Adipocytes	36	15	0.06	0.05	0.02	0.349199	0.311577	1.39224	0	0.413006	0.443485
CD8A	B cells	760	101	1.33	0.31	1.03	1.81947e-52	6.33548e-62	4.40978	0	6.01216e-52	2.94147e-61	***
CD8A	Breast cancer	1000	783	1.75	2.37	-0.61	2.13643e-10	3.18902e-10	0.736134	0	4.44846e-10	8.51862e-10	***
CD8A	Breast glandular cells	13712	11107	24.06	33.61	-9.54	2.1813e-209	2.3314e-206	0.626075	0	1.50708e-208	1.8942e-205	***
CD8A	Breast myoepithelial cells	48	77	0.08	0.23	-0.15	1.31033e-08	2.15089e-08	0.361024	0	2.58662e-08	5.51872e-08	***
CD8A	Dendritic cells	2	0	0	0	0	NA	0.535326	Inf	0	NA	0.698533
CD8A	Endothelial cells	58	17	0.1	0.05	0.05	0.016209	0.0115344	1.97981	0	0.0243938	0.022051	*
CD8A	Epithelial cells	0	2	0	0.01	-0.01	NA	0.134752	0	0	NA	0.208544
CD8A	Fibroblasts	1840	1344	3.23	4.07	-0.84	6.17415e-11	7.97424e-11	0.787192	0	1.30343e-10	2.19011e-10	***
CD8A	Macrophages	3846	1208	6.75	3.66	3.09	4.51233e-84	2.40834e-89	1.90785	0	2.01728e-83	1.38125e-88	***
CD8A	Mast cells	0	0	0	0	0	NA	1	0	0	NA	1
CD8A	Monocytes	0	0	0	0	0	NA	1	0	0	NA	1
CD8A	NK cells	5	1	0.01	0	0.01	0.551815	0.424816	2.90013	0	0.607796	0.591707
CD8A	Smooth muscle cells	36	33	0.06	0.1	-0.04	0.0731864	0.0610075	0.632528	0	0.0975818	0.101679
CD8A	T cells	35638	18361	62.54	55.56	6.99	1.91622e-94	4.08091e-94	1.33572	0	9.10206e-94	2.41145e-93	***
GZMA	Adipocytes	23	14	0.05	0.07	-0.02	0.388134	0.287301	0.703514	6.69257e-92	0.450353	0.411939
GZMA	B cells	508	61	1.11	0.31	0.8	1.1459e-23	3.16848e-28	3.59609	6.69257e-92	2.85537e-23	1.08395e-27	***
GZMA	Breast cancer	615	340	1.34	1.73	-0.39	0.000157377	0.000184075	0.77166	6.69257e-92	0.000274958	0.000412581	***
GZMA	Breast glandular cells	6631	3450	14.49	17.6	-3.11	6.81437e-24	1.83968e-23	0.793321	6.69257e-92	1.72631e-23	5.69424e-23	***
GZMA	Breast myoepithelial cells	23	30	0.05	0.15	-0.1	4.4906e-05	6.30918e-05	0.328044	6.69257e-92	7.93687e-05	0.00014474	***
GZMA	Dendritic cells	0	0	0	0	0	NA	1	0	6.69257e-92	NA	1
GZMA	Endothelial cells	34	9	0.07	0.05	0.03	0.258408	0.243996	1.61853	6.69257e-92	0.314224	0.357739
GZMA	Epithelial cells	0	4	0	0.02	-0.02	NA	0.00808473	0	6.69257e-92	NA	0.0156091	*
GZMA	Fibroblasts	1281	722	2.8	3.68	-0.88	2.15571e-09	3.57024e-09	0.753009	6.69257e-92	4.42794e-09	9.28264e-09	***
GZMA	Macrophages	3168	792	6.92	4.04	2.88	2.3476e-45	1.06228e-48	1.76628	6.69257e-92	6.99676e-45	4.1429e-48	***
GZMA	Mast cells	0	0	0	0	0	NA	1	0	6.69257e-92	NA	1
GZMA	Monocytes	0	0	0	0	0	NA	1	0	6.69257e-92	NA	1
GZMA	NK cells	11	3	0.02	0.02	0.01	0.683775	0.574676	1.57064	6.69257e-92	0.73712	0.742131
GZMA	Smooth muscle cells	21	18	0.05	0.09	-0.05	0.0424338	0.0350046	0.499459	6.69257e-92	0.0597216	0.0626228	†
GZMA	T cells	33462	14164	73.1	72.24	0.86	0.0243587	0.0241487	1.04416	6.69257e-92	0.0352622	0.0440092	*
CCR2	Adipocytes	9	8	0.03	0.1	-0.07	0.0147321	0.0120309	0.286709	0	0.0225626	0.0227769	*
CCR2	B cells	5402	339	16.4	4.03	12.36	7.2409e-188	2.3079e-235	4.66513	0	4.23314e-187	2.0456e-234	***
CCR2	Breast cancer	447	188	1.36	2.24	-0.88	6.22604e-09	2.19475e-08	0.600972	0	1.24521e-08	5.55812e-08	***
CCR2	Breast glandular cells	4622	2597	14.03	30.91	-16.88	1.50793e-289	6.4059e-260	0.364813	0	1.27336e-288	6.2458e-259	***
CCR2	Breast myoepithelial cells	8	12	0.02	0.14	-0.12	3.57843e-05	0.00011912	0.169829	0	6.47526e-05	0.000270097	***
CCR2	Dendritic cells	5	1	0.02	0.01	0	1	1	1.27518	0	1	1
CCR2	Endothelial cells	26	6	0.08	0.07	0.01	0.999084	1	1.10521	0	1	1
CCR2	Epithelial cells	0	2	0	0.02	-0.02	NA	0.041289	0	0	NA	0.0725348	†
CCR2	Fibroblasts	1212	335	3.68	3.99	-0.31	0.194633	0.18674	0.919715	0	0.240522	0.284486
CCR2	Macrophages	2891	769	8.77	9.15	-0.38	0.286644	0.282053	0.9548	0	0.345793	0.40741
CCR2	Mast cells	0	0	0	0	0	NA	1	0	0	NA	1
CCR2	Monocytes	0	0	0	0	0	NA	1	0	0	NA	1
CCR2	NK cells	0	0	0	0	0	NA	1	0	0	NA	1
CCR2	Smooth muscle cells	20	10	0.06	0.12	-0.06	0.122354	0.107378	0.509745	0	0.157609	0.170234
CCR2	T cells	18307	4136	55.56	49.22	6.34	2.39844e-25	2.58094e-25	1.28989	0	6.58941e-25	8.25054e-25	***
CXCL12	Adipocytes	445	267	0.45	0.48	-0.03	0.363113	0.347213	0.929054	0	0.424562	0.487098
CXCL12	B cells	2543	269	2.55	0.48	2.07	2.99095e-188	1.3869e-229	5.38261	0	1.8185e-187	1.1759e-228	***
CXCL12	Breast cancer	8777	6530	8.81	11.76	-2.95	1.51428e-77	5.64102e-76	0.725323	0	6.39363e-77	3.05555e-75	***
CXCL12	Breast glandular cells	28223	20428	28.33	36.78	-8.44	8.52369e-259	6.1971e-256	0.679654	0	6.16953e-258	5.7545e-255	***
CXCL12	Breast myoepithelial cells	89	122	0.09	0.22	-0.13	3.9827e-11	8.16437e-11	0.406259	0	8.64816e-11	2.21118e-10	***
CXCL12	Dendritic cells	0	6	0	0.01	-0.01	0.00431025	0.0021047	0	0	0.00696976	0.00451007	**
CXCL12	Endothelial cells	583	267	0.59	0.48	0.1	0.00829443	0.00790205	1.21882	0	0.0128648	0.0155212	*
CXCL12	Epithelial cells	1	4	0	0.01	-0.01	0.110667	0.0586024	0.139399	0	0.143772	0.0985126
CXCL12	Fibroblasts	23690	15220	23.78	27.4	-3.62	6.00644e-56	1.5581e-55	0.826742	0	2.02884e-55	6.9052e-55	***
CXCL12	Macrophages	12645	3863	12.69	6.95	5.74	1.47984e-270	4.3928e-287	1.94528	0	1.12468e-269	4.7589e-286	***
CXCL12	Mast cells	1	0	0	0	0	NA	1	Inf	0	NA	1
CXCL12	Monocytes	0	0	0	0	0	NA	1	0	0	NA	1
CXCL12	NK cells	3	2	0	0	0	1	1	0.836437	0	1	1
CXCL12	Smooth muscle cells	260	290	0.26	0.52	-0.26	1.57124e-16	5.51159e-16	0.498618	0	3.5646e-16	1.60412e-15	***
CXCL12	T cells	22347	8275	22.44	14.9	7.54	6.32002e-280	1.7401e-289	1.65219	0	5.05602e-279	1.996e-288	***
AURKA	Adipocytes	17	16	0.03	0.02	0	0.857552	0.731575	1.13103	0	0.898951	0.9324
AURKA	B cells	537	59	0.89	0.09	0.8	3.80423e-92	8.94e-105	9.7664	0	1.75225e-91	5.4478e-104	***
AURKA	Breast cancer	1824	2641	3.03	4.12	-1.09	5.89771e-25	3.85791e-25	0.726905	0	1.57272e-24	1.21337e-24	***
AURKA	Breast glandular cells	44804	54831	74.38	85.52	-11.13	0	0	0.491758	0	0	0	***
AURKA	Breast myoepithelial cells	42	325	0.07	0.51	-0.44	1.87131e-45	6.3007e-52	0.136963	0	5.68877e-45	2.61412e-51	***
AURKA	Dendritic cells	2	0	0	0	0	NA	0.234629	Inf	0	NA	0.349256
AURKA	Endothelial cells	35	23	0.06	0.04	0.02	0.0922986	0.086815	1.62018	0	0.120943	0.139909
AURKA	Epithelial cells	0	12	0	0.02	-0.02	0.00214848	0.000519664	0	0	0.00362855	0.00113859	**
AURKA	Fibroblasts	958	742	1.59	1.16	0.43	5.74979e-11	5.34338e-11	1.38038	0	1.23094e-10	1.48851e-10	***
AURKA	Macrophages	1735	717	2.88	1.12	1.76	2.56919e-110	3.6708e-113	2.62251	0	1.25973e-109	2.386e-112	***
AURKA	Mast cells	0	0	0	0	0	NA	1	0	0	NA	1
AURKA	Monocytes	0	0	0	0	0	NA	1	0	0	NA	1
AURKA	NK cells	0	1	0	0	0	NA	1	0	0	NA	1
AURKA	Smooth muscle cells	35	31	0.06	0.05	0.01	0.533005	0.462925	1.20193	0	0.593749	0.626877
AURKA	T cells	10245	4719	17.01	7.36	9.65	0	0	2.57963	0	0	0	***
KIT	Adipocytes	12	23	0.05	0.03	0.02	0.292027	0.240965	1.55445	0	0.349512	0.355972
KIT	B cells	143	37	0.54	0.05	0.49	8.37924e-63	1.24727e-52	11.5694	0	3.18411e-62	5.28736e-52	***
KIT	Breast cancer	1849	5547	6.98	7.03	-0.05	0.795769	0.791717	0.992433	0	0.845853	0.996031
KIT	Breast glandular cells	21739	69939	82.1	88.67	-6.57	1.59972e-166	3.9706e-157	0.5862	0	9.00584e-166	2.8677e-156	***
KIT	Breast myoepithelial cells	20	413	0.08	0.52	-0.45	1.0672e-22	3.29134e-30	0.14361	0	2.61637e-22	1.18854e-29	***
KIT	Dendritic cells	4	1	0.02	0	0.01	0.0207271	0.0159358	11.9166	0	0.0302934	0.0295951	*
KIT	Endothelial cells	30	43	0.11	0.05	0.06	0.00260917	0.00274508	2.07957	0	0.00426444	0.00569457	**
KIT	Epithelial cells	1	14	0	0.02	-0.01	0.176625	0.136607	0.212746	0	0.223725	0.20975
KIT	Fibroblasts	253	506	0.96	0.64	0.31	2.15678e-07	4.27807e-07	1.49416	0	4.14975e-07	1.05598e-06	***
KIT	Macrophages	362	346	1.37	0.44	0.93	2.53028e-57	7.04266e-50	3.14566	0	8.74097e-57	2.86108e-49	***
KIT	Mast cells	1	1	0	0	0	NA	0.43949	2.97891	0	NA	0.603525
KIT	Monocytes	0	0	0	0	0	NA	1	0	0	NA	1
KIT	NK cells	0	0	0	0	0	NA	1	0	0	NA	1
KIT	Smooth muscle cells	10	16	0.04	0.02	0.02	0.179948	0.118521	1.86205	0	0.224895	0.184893
KIT	T cells	2055	1992	7.76	2.53	5.24	1.51184087627421e-321	1.5011e-279	3.24747	0	1.35176360702165e-320	1.5406e-278	***
LARS	Adipocytes	157	141	0.16	0.12	0.04	0.00649898	0.0060687	1.37899	0	0.010184	0.0122	*
LARS	B cells	1714	204	1.76	0.17	1.59	0	0	10.5689	0	0	0	***
LARS	Breast cancer	3507	5307	3.6	4.4	-0.8	4.27558e-21	2.89501e-21	0.811267	0	1.01545e-20	8.82072e-21	***
LARS	Breast glandular cells	65656	99759	67.33	82.64	-15.31	0	0	0.432973	0	0	0	***
LARS	Breast myoepithelial cells	91	617	0.09	0.51	-0.42	5.28434e-65	1.21444e-74	0.181818	0	2.05954e-64	6.40045e-74	***
LARS	Dendritic cells	5	3	0.01	0	0	0.510539	0.47995	2.06328	0	0.574829	0.64545
LARS	Endothelial cells	246	136	0.25	0.11	0.14	1.30625e-14	1.15058e-14	2.24233	0	2.87755e-14	3.25164e-14	***
LARS	Epithelial cells	1	28	0	0.02	-0.02	1.86814e-05	1.39312e-06	0.0442011	0	3.42117e-05	3.35381e-06	***
LARS	Fibroblasts	4327	3500	4.44	2.9	1.54	3.9663e-82	1.24797e-81	1.55503	0	1.72251e-81	6.95296e-81	***
LARS	Macrophages	4973	2100	5.1	1.74	3.36	0	0	3.03531	0	0	0	***
LARS	Mast cells	2	0	0	0	0	NA	0.199667	Inf	0	NA	0.301822
LARS	Monocytes	0	0	0	0	0	NA	1	0	0	NA	1
LARS	NK cells	6	0	0.01	0	0.01	0.0206233	0.00795957	Inf	0	0.0302934	0.0155212	*
LARS	Smooth muscle cells	417	513	0.43	0.42	0	0.950641	0.947305	1.00629	0	0.976334	1
LARS	T cells	16416	8412	16.83	6.97	9.87	0	0	2.70238	0	0	0	***
VEGFA	Adipocytes	13	22	0.01	0.01	0	0.874537	0.863393	0.890843	0	0.910477	1
VEGFA	B cells	1431	207	1.11	0.11	1	0	0	10.5274	0	0	0	***
VEGFA	Breast cancer	4232	5752	3.28	2.96	0.32	2.08281e-07	2.20426e-07	1.11294	0	4.0588e-07	5.51066e-07	***
VEGFA	Breast glandular cells	106962	178671	82.95	91.91	-8.96	0	0	0.428436	0	0	0	***
VEGFA	Breast myoepithelial cells	88	591	0.07	0.3	-0.24	2.16313e-46	6.32226e-54	0.223959	0	6.71011e-46	2.73965e-53	***
VEGFA	Dendritic cells	5	4	0	0	0	0.535155	0.498106	1.88452	0	0.593749	0.665279
VEGFA	Endothelial cells	15	10	0.01	0.01	0.01	0.0642324	0.0636021	2.26162	0	0.086401	0.105105
VEGFA	Epithelial cells	3	27	0	0.01	-0.01	0.00160001	0.000538883	0.167516	0	0.0027326	0.00116758	**
VEGFA	Fibroblasts	4268	3203	3.31	1.65	1.66	3.02054e-208	5.945e-203	2.04349	0	1.99618e-207	4.6371e-202	***
VEGFA	Macrophages	3012	1398	2.34	0.72	1.62	0	0	3.30197	0	0	0	***
VEGFA	Mast cells	0	0	0	0	0	NA	1	0	0	NA	1
VEGFA	Monocytes	0	0	0	0	0	NA	1	0	0	NA	1
VEGFA	NK cells	0	1	0	0	0	NA	1	0	0	NA	1
VEGFA	Smooth muscle cells	103	152	0.08	0.08	0	0.917403	0.898227	1.02165	0	0.948607	1
VEGFA	T cells	8815	4367	6.84	2.25	4.59	0	0	3.19315	0	0	0	***
WARS	Adipocytes	405	182	0.3	0.19	0.1	2.16101e-06	1.50317e-06	1.52786	0	4.00577e-06	3.57462e-06	***
WARS	B cells	3606	375	2.64	0.4	2.24	0	0	6.74667	0	0	0	***
WARS	Breast cancer	5889	4779	4.32	5.11	-0.79	9.05662e-19	1.20223e-18	0.838221	0	2.11786e-18	3.6067e-18	***
WARS	Breast glandular cells	68163	64429	49.98	68.88	-18.9	0	0	0.451515	0	0	0	***
WARS	Breast myoepithelial cells	189	518	0.14	0.55	-0.42	1.58361e-69	5.38679e-69	0.24922	0	6.33443e-69	2.62606e-68	***
WARS	Dendritic cells	16	8	0.01	0.01	0	0.599348	0.537333	1.37182	0	0.655402	0.698533
WARS	Endothelial cells	1267	445	0.93	0.48	0.45	2.75783e-35	3.35503e-37	1.96179	0	7.90924e-35	1.2344e-36	***
WARS	Epithelial cells	1	27	0	0.03	-0.03	6.15202e-09	4.83527e-10	0.0253799	0	1.24521e-08	1.27416e-09	***
WARS	Fibroblasts	10421	7064	7.64	7.55	0.09	0.431321	0.427921	1.01283	0	0.496672	0.591806
WARS	Macrophages	15186	4071	11.13	4.35	6.78	0	0	2.75375	0	0	0	***
WARS	Mast cells	1	0	0	0	0	NA	1	Inf	0	NA	1
WARS	Monocytes	0	0	0	0	0	NA	1	0	0	NA	1
WARS	NK cells	13	3	0.01	0	0.01	0.125619	0.0804681	2.97234	0	0.160455	0.130761
WARS	Smooth muscle cells	321	270	0.24	0.29	-0.05	0.0148438	0.0149653	0.815021	0	0.0225626	0.0280599	*
WARS	T cells	30905	11373	22.66	12.16	10.5	0	0	2.11695	0	0	0	***
WEE1	Adipocytes	27	29	0.03	0.02	0.02	0.0280197	0.023146	1.8511	0	0.0398037	0.0425798	*
WEE1	B cells	351	57	0.45	0.04	0.41	9.02525e-112	2.1172e-107	12.2927	0	4.57279e-111	1.3318e-106	***
WEE1	Breast cancer	1780	4727	2.26	3.02	-0.76	3.46561e-26	4.96992e-27	0.742718	0	9.75506e-26	1.6426e-26	***
WEE1	Breast glandular cells	66107	144820	83.94	92.5	-8.57	0	0	0.423536	0	0	0	***
WEE1	Breast myoepithelial cells	48	406	0.06	0.26	-0.2	7.13174e-25	8.03901e-30	0.234575	0	1.86901e-24	2.8502e-29	***
WEE1	Dendritic cells	2	0	0	0	0	NA	0.112018	Inf	0	NA	0.176157
WEE1	Endothelial cells	30	36	0.04	0.02	0.02	0.0532025	0.0494617	1.65681	0	0.0741907	0.0853543	†
WEE1	Epithelial cells	1	18	0	0.01	-0.01	0.0181536	0.00653515	0.110421	0	0.0270524	0.0130036	*
WEE1	Fibroblasts	1330	1327	1.69	0.85	0.84	5.01173e-74	4.4146e-70	2.00941	0	2.05887e-73	2.2073e-69	***
WEE1	Macrophages	1391	762	1.77	0.49	1.28	1.84838e-207	1.8084e-192	3.67571	0	1.17064e-206	1.3563e-191	***
WEE1	Mast cells	0	0	0	0	0	NA	1	0	0	NA	1
WEE1	Monocytes	0	0	0	0	0	NA	1	0	0	NA	1
WEE1	NK cells	1	0	0	0	0	NA	0.334692	Inf	0	NA	0.472934
WEE1	Smooth muscle cells	35	59	0.04	0.04	0.01	0.506448	0.445287	1.17928	0	0.574478	0.607209
WEE1	T cells	7656	4318	9.72	2.76	6.96	0	0	3.79613	0	0	0	***
