# Supplementary material
Source: Research Square preprint supplement (doi:10.21203/rs.3.rs-9572543/v1)
Supplement: Supplementary file 10 [file 77c6c4b23d37be5bb469415b.xlsx]

## Sheet: TableS3
upperSymbol	Symbol	GeneID	Alias	Description	05.RCC	06.RCC	07.RCC	08.RCC	09.RCC	10.RCC	11.RCC	12.RCC	baseMean	log2FoldChange	pvalue	padj
ABCC1	ABCC1	4363	ABC29|ABCC|GS-X|MRP|MRP1	ATP-binding cassette_ sub-family C (CFTR/MRP)_ member 1	7.40224	7.58053	7.12309	7.24223	7.26668	6.72727	7.41313	6.59942	143.94	0.045041	0.936365	0.986676
ABCC4	ABCC4	10257	MOAT-B|MOATB|MRP4	ATP-binding cassette_ sub-family C (CFTR/MRP)_ member 4	8.90474	7.34607	6.33882	3.85052	5.06591	3.86054	7.33913	4.29777	58.7061	-1.55943	0.140459	0.830733
ABCG2	ABCG2	9429	ABC15|ABCP|BCRP|BCRP1|BMDP|CD338|CDw338|EST157481|GOUT1|MRX|MXR|MXR-1|MXR1|UAQTL1	ATP-binding cassette_ sub-family G (WHITE)_ member 2 (Junior blood group)	5.81728	3.25861	1.16889	0.837696	1.41955	2.53861	3.0912	2.26382	5.85414	1.31861	0.0541578	0.830733
ABI1	ABI1	10006	ABI-1|ABLBP4|E3B1|NAP1BP|SSH3BP|SSH3BP1	abl-interactor 1	8.40224	6.42853	6.29817	6.81498	6.74618	6.13765	7.79164	6.10032	114.56	-0.0333201	0.939435	0.986676
ABL1	ABL1	25	ABL|JTK7|bcr/abl|c-ABL|c-ABL1|p150|v-abl	ABL proto-oncogene 1_ non-receptor tyrosine kinase	6.81728	6.06596	5.92378	7.131	6.21566	7.00574	6.26113	5.98003	85.9289	0.318361	0.73692	0.930669
ACKR2	ACKR2	1238	CCBP2|CCR10|CCR9|CMKBR9|D6|hD6	atypical chemokine receptor 2	6.81728	3.67364	2.16889	1.88832	0.802879	0.621073	4.67617	2.45647	7.4029	0.415037	0.621583	0.879197
ACKR3	ACKR3	57007	CMKOR1|CXC-R7|CXCR-7|CXCR7|GPR159|RDC-1|RDC1	atypical chemokine receptor 3	5.81728	5.37408	6.37834	4.60777	5.17676	4.24556	6.0912	4.22906	37.792	-0.267696	0.746891	0.9381
ACSL3	ACSL3	2181	ACS3|FACL3|PRO2194	acyl-CoA synthetase long-chain family member 3	4.81728	4.481	4.33882	3.64505	3.4959	5.55967	5.89856	4.70439	24.5489	1.84246	0.0190829	0.830733
ACTG2	ACTG2	72	ACT|ACTA3|ACTE|ACTL3|ACTSG|VSCM	actin_ gamma 2_ smooth muscle_ enteric	6.81728	5.13308	5.16889	6.90225	7.13678	3.92688	7.94919	3.95897	58.6542	1.19973	0.343534	0.830733
ADH1A	ADH1A	124	ADH1	alcohol dehydrogenase 1A (class I)_ alpha polypeptide	6.40224	3.67364	3.16889	2.58493	-0.104012	1.77308	3.0912	3.26382	7.8993	0.63743	0.520022	0.861393
ADM	ADM	133	AM|PAMP	adrenomedullin	4.81728	4.25861	5.33882	4.26875	3.56841	5.1022	5.0912	4.31445	24.167	0.294447	0.777832	0.948055
ADORA2A	ADORA2A	135	A2aR|ADORA2|RDC8	adenosine A2a receptor	9.40224	6.25861	4.75385	4.66697	2.85018	2.77308	7.48352	3.29777	36.3977	-1.94589	0.183698	0.830733
ADORA2B	ADORA2B	136	ADORA2	adenosine A2b receptor	5.81728	1.67364	4.16889	1.20027	2.14392	0.258502	4.67617	2.95897	7.27125	0.378512	0.657305	0.89403
AGO2	AGO2	27161	EIF2C2|Q10	argonaute RISC catalytic component 2	6.40224	5.84357	5.86933	6.15187	5.60679	5.54918	5.67617	6.14763	59.9567	0.955999	0.555667	0.861393
AGO4	AGO4	192670	EIF2C4	argonaute RISC catalytic component 4	8.62463	5.92157	6.69245	6.04157	6.39384	6.10578	7.61477	5.89941	101.248	-0.273423	0.627051	0.881902
AIMP2	AIMP2	7965	JTV-1|JTV1|P38|PRO0992	aminoacyl tRNA synthetase complex-interacting multifunctional protein 2	4.81728	5.37408	5.81275	5.98744	4.24472	4.95099	5.67617	5.04143	37.7422	-0.517607	0.534353	0.861393
AKT1	AKT1	207	AKT|CWS6|PKB|PKB-ALPHA|PRKBA|RAC|RAC-ALPHA	v-akt murine thymoma viral oncogene homolog 1	4.81728	6.80293	8.07578	8.56075	7.48283	10.7752	7.61477	7.87572	215.367	1.66214	0.22116	0.830733
AKT1S1	AKT1S1	84335	Lobe|PRAS40	AKT1 substrate 1 (proline-rich)	6.81728	4.67364	4.49082	4.23001	3.4959	3.2585	6.0912	4.36336	25.5915	0.771731	0.256509	0.830733
AKT2	AKT2	208	HIHGHH|PKBB|PKBBETA|PRKBB|RAC-BETA	v-akt murine thymoma viral oncogene homolog 2	7.81728	7.06596	7.56121	6.91604	7.59989	7.59581	8.1356	7.70123	187.29	0.771227	0.0130119	0.830733
AKT3	AKT3	10000	MPPH|MPPH2|PKB-GAMMA|PKBG|PRKBG|RAC-PK-gamma|RAC-gamma|STK-2	v-akt murine thymoma viral oncogene homolog 3	4.81728	7.09991	6.29817	5.33412	6.30538	6.02858	7.17867	4.94832	64.0578	0.282677	0.7623	0.942317
ALDH1A3	ALDH1A3	220	ALDH1A6|ALDH6|MCOP8|RALDH3	aldehyde dehydrogenase 1 family_ member A3	4.81728	3.67364	5.92378	4.65239	5.13916	4.61102	5.41313	4.11943	27.7368	0.0740006	0.948417	0.987561
ALDOA	ALDOA	226	ALDA|GSD12|HEL-S-87p	aldolase A_ fructose-bisphosphate	6.40224	8.50653	10.618	10.2155	9.24416	10.345	10.2101	10.1236	703.378	2.65034	0.329208	0.830733
AMOTL2	AMOTL2	51421	LCCP	angiomotin like 2	4.81728	1.67364	1.16889	2.03034	2.21792	2.58043	3.0912	2.11943	5.5113	1.15375	0.162303	0.830733
ANGPT2	ANGPT2	285	AGPT2|ANG2	angiopoietin 2	7.13921	5.92157	5.62832	2.78523	3.61023	3.95894	7.17867	3.51536	31.2805	0.672114	0.555799	0.861393
APC	APC	324	BTPS2|DP2|DP2.5|DP3|GS|PPP1R46	adenomatous polyposis coli	6.40224	5.13308	5.81275	6.38569	5.58948	5.75493	5.89856	5.43375	55.7658	0.155871	0.857998	0.978446
AR	AR	367	AIS|AR8|DHTR|HUMARA|HYSP1|KD|NR3C4|SBMA|SMAX1|TFM	androgen receptor	4.81728	1.67364	1.16889	4.89453	4.56132	7.0677	4.67617	0.193432	12.3944	1.6822	0.460551	0.842916
ARID1A	ARID1A	8289	B120|BAF250|BAF250a|BM029|C1orf4|ELD|MRD14|OSA1|P270|SMARCF1|hELD|hOSA1	AT rich interactive domain 1A (SWI-like)	7.9872	6.76111	7.29817	5.74115	5.81783	6.37001	6.9981	6.18892	100.101	-0.401707	0.202023	0.830733
ARID1B	ARID1B	57492	6A3-5|BAF250B|BRIGHT|DAN15|ELD/OSA1|MRD12|OSA2|P250R	AT rich interactive domain 1B (SWI1-like)	8.72417	5.92157	6.75385	5.66334	5.37172	6.43699	7.48352	6.57541	98.1095	-0.354155	0.575867	0.865546
ARID2	ARID2	196528	BAF200|p200	AT rich interactive domain 2 (ARID_ RFX-like)	8.9872	7.50653	7.43568	6.96845	5.8988	7.58429	7.55064	6.85735	162.988	-0.653349	0.16662	0.830733
ARID4A	ARID4A	5926	RBBP-1|RBBP1|RBP-1|RBP1	AT rich interactive domain 4A (RBP1-like)	4.81728	4.481	5.07578	4.98454	4.87898	5.57527	3.0912	4.36336	25.2538	0.645717	0.545036	0.861393
ARID4B	ARID4B	51742	BCAA|BRCAA1|RBBP1L1|RBP1L1|SAP180	AT rich interactive domain 4B (RBP1-like)	6.40224	6.19721	6.16889	6.47536	6.93902	6.90647	7.17867	7.46583	105.18	2.44188	0.163	0.830733
ASH1L	ASH1L	55870	ASH1|ASH1L1|KMT2H	ash1 (absent_ small_ or homeotic)-like (Drosophila)	4.81728	7.1655	7.66074	7.44397	7.75708	8.41404	8.0912	7.39507	162.366	2.3498	0.251464	0.830733
ASXL2	ASXL2	55252	ASXH2	additional sex combs like transcriptional regulator 2	6.81728	4.99557	6.21328	4.79852	4.53261	5.19261	6.26113	4.9159	44.1966	0.233797	0.766984	0.942317
ATF2	ATF2	1386	CRE-BP1|CREB-2|CREB2|HB16|TREB7	activating transcription factor 2	7.40224	6.42853	7.54393	6.51818	6.92113	6.57527	5.67617	7.04143	108.636	0.0161197	0.983313	0.989966
ATF4	ATF4	468	CREB-2|CREB2|TAXREB67|TXREB	activating transcription factor 4	7.40224	8.80293	8.25635	8.1965	7.54255	8.2415	8.0912	8.82933	288.08	0.180082	0.808183	0.955711
ATF7IP	ATF7IP	55729	AM|ATF-IP|MCAF|MCAF1|p621	activating transcription factor 7 interacting protein	7.81728	7.28835	7.72348	7.66968	7.53533	7.14812	7.48352	7.10273	177.424	-0.0330583	0.911809	0.986676
ATG101	ATG101	60673	C12orf44	autophagy related 101	8.72417	6.92157	5.86933	6.57916	5.35132	6.39951	6.67617	7.36336	106.564	-0.560159	0.368448	0.830733
ATG2B	ATG2B	55102	C14orf103	autophagy related 2B	6.40224	5.92157	6.41682	6.00188	5.55777	6.30913	5.0912	5.6724	60.616	-0.0573299	0.978981	0.989915
ATG4B	ATG4B	23192	APG4B|AUTL1	autophagy related 4B_ cysteine peptidase	6.40224	5.99557	6.89681	6.26156	5.94584	6.45115	6.41313	5.99045	78.4985	1.31843	0.435954	0.839259
ATM	ATM	472	AT1|ATA|ATC|ATD|ATDC|ATE|TEL1|TELO1	ATM serine/threonine kinase	6.40224	6.37408	6.97625	6.71859	5.54345	5.99804	6.26113	6.52614	81.5713	0.911809	0.604364	0.873549
ATOX1	ATOX1	475	ATX1|HAH1	antioxidant 1 copper chaperone	8.27671	6.76111	6.86933	6.54012	5.72571	8.45044	7.17867	6.27665	128.876	0.374578	0.521018	0.861393
ATP7A	ATP7A	538	DSMAX|MK|MNK|SMAX3	ATPase_ Cu++ transporting_ alpha polypeptide	4.81728	4.481	4.16889	3.53814	4.48095	4.54918	5.67617	3.42609	20.9985	1.38702	0.0239578	0.830733
ATR	ATR	545	FCTCS|FRP1|MEC1|SCKL|SCKL1	ATR serine/threonine kinase	5.81728	4.67364	5.49082	5.3018	4.63746	5.36404	5.0912	5.3793	37.2571	0.36687	0.842946	0.973838
ATRX	ATRX	546	ATR2|JMS|MRX52|MRXHF1|RAD54|RAD54L|SFM1|SHS|XH2|XNP|ZNF-HX	alpha thalassemia/mental retardation syndrome X-linked	6.40224	6.62784	6.69245	6.88677	7.0381	6.91263	7.17867	6.558	110.438	1.85566	0.305504	0.830733
ATXN7	ATXN7	6314	ADCAII|OPCA3|SCA7	ataxin 7	6.81728	5.92157	5.49082	6.29244	5.82968	6.40243	5.89856	5.51536	64.9392	0.380604	0.664816	0.89879
AURKA	AURKA	6790	AIK|ARK1|AURA|AURORA2|BTAK|PPP1R47|STK15|STK6|STK7	aurora kinase A	8.62463	6.481	6.29817	6.03597	5.27969	4.58043	6.55064	6.08582	75.6907	-1.29022	0.0432128	0.830733
AURKB	AURKB	9212	AIK2|AIM-1|AIM1|ARK2|AurB|IPL1|PPP1R48|STK12|STK5|aurkb-sv1|aurkb-sv2	aurora kinase B	4.81728	4.481	5.41682	5.58876	4.63746	3.60089	5.0912	5.74187	30.314	0.048363	0.966544	0.989146
AXL	AXL	558	ARK|JTK11|Tyro7|UFO	AXL receptor tyrosine kinase	5.81728	6.25861	5.86933	5.66697	4.8208	6.03611	6.26113	5.04143	52.7631	0.986787	0.523604	0.861393
B2M	B2M	567	-	beta-2-microglobulin	5.81728	12.0904	12.5076	12.6241	10.9693	11.5479	11.836	10.9759	2114.47	2.02467	0.539233	0.861393
B4GALNT1	B4GALNT1	2583	GALGT|GALNACT|GalNAc-T|SPG26	beta-1_4-N-acetyl-galactosaminyl transferase 1	5.81728	2.67364	2.16889	1.35227	5.15808	1.35804	3.0912	4.9159	9.9653	3.76553	0.0187509	0.830733
B4GALT1	B4GALT1	2683	B4GAL-T1|CDG2D|GGTB2|GT1|GTB|beta4Gal-T1	UDP-Gal:betaGlcNAc beta 1_4- galactosyltransferase_ polypeptide 1	7.40224	7.3175	7.56121	7.61999	6.28401	8.01815	7.48352	7.26382	165.284	0.232718	0.721219	0.924388
BAD	BAD	572	BBC2|BCL2L8	BCL2-associated agonist of cell death	6.40224	5.481	5.49082	5.40972	4.96745	5.47905	5.0912	4.99045	42.6357	0.00117242	0.999507	1
BAX	BAX	581	BCL2L4	BCL2-associated X protein	7.81728	5.13308	5.81275	6.51617	5.78473	5.30913	7.26113	6.07608	74.2229	0.263034	0.59337	0.873549
BCAP31	BCAP31	10134	6C6-AG|BAP31|CDM|DDCH|DXS1357E	B-cell receptor-associated protein 31	4.81728	7.13308	7.19126	7.57144	7.0821	8.42484	8.79164	7.79186	163.193	2.58337	0.210023	0.830733
BCL2	BCL2	596	Bcl-2|PPP1R50	B-cell CLL/lymphoma 2	7.62463	6.80293	4.97625	4.50607	7.54794	4.10936	6.0912	6.3793	64.2093	0.776958	0.353926	0.830733
BCL2A1	BCL2A1	597	ACC-1|ACC-2|ACC1|ACC2|BCL2L5|BFL1|GRS|HBPA1	BCL2-related protein A1	5.81728	8.51913	3.75385	3.87583	2.38784	3.12357	4.67617	3.19343	21.3829	-1.08814	0.619987	0.87861
BCL2L1	BCL2L1	598	BCL-XL/S|BCL2L|BCLX|BCLXL|BCLXS|Bcl-X|PPP1R52|bcl-xL|bcl-xS	BCL2-like 1	6.81728	5.84357	6.45429	7.29947	5.52898	7.34899	6.79164	6.10032	91.9686	0.333341	0.734533	0.930669
BHLHE40	BHLHE40	8553	BHLHB2|DEC1|HLHB2|SHARP-2|STRA13|Stra14	basic helix-loop-helix family_ member e40	6.40224	5.481	6.59516	5.78856	4.81485	8.37299	5.89856	6.89941	77.7945	1.53663	0.205849	0.830733
BIRC3	BIRC3	330	AIP1|API2|CIAP2|HAIP1|HIAP1|MALT2|MIHC|RNF49|c-IAP2	baculoviral IAP repeat containing 3	4.81728	5.37408	1.16889	3.33412	0.983451	1.15159	4.0912	1.8715	7.20508	-2.32193	0.0724348	0.830733
BIRC5	BIRC5	332	API4|EPR-1	baculoviral IAP repeat containing 5	6.40224	6.37408	7.23498	5.87896	6.96611	4.91058	6.67617	8.44136	97.7186	1.08396	0.338204	0.830733
BLK	BLK	640	MODY11	BLK proto-oncogene_ Src family tyrosine kinase	7.9872	4.67364	4.33882	1.27827	-0.782084	-0.548852	6.9981	1.45647	9.03294	-1.66151	0.425924	0.833614
BLM	BLM	641	BS|RECQ2|RECQL2|RECQL3	Bloom syndrome_ RecQ helicase-like	8.51772	5.99557	6.25635	4.36126	4.59643	2.8087	7.41313	5.43375	51.0155	-0.760583	0.426457	0.833614
BMPR1A	BMPR1A	657	10q23del|ACVRLK3|ALK3|CD292|SKR5	bone morphogenetic protein receptor_ type IA	4.81728	6.3175	6.41682	6.70453	7.52626	6.9629	6.55064	5.94832	84.7728	1.81804	0.309442	0.830733
BMPR2	BMPR2	659	BMPR-II|BMPR3|BMR2|BRK-3|POVD1|PPH1|T-ALK	bone morphogenetic protein receptor_ type II (serine/threonine kinase)	7.81728	6.481	8.31864	6.20527	6.63577	7.70971	7.26113	6.8911	143.508	0.0323609	0.952388	0.987561
BRAF	BRAF	673	B-RAF1|BRAF1|NS7|RAFB1	B-Raf proto-oncogene_ serine/threonine kinase	7.81728	6.13308	7.43568	6.6228	6.73834	7.021	7.17867	7.1336	128.895	0.309263	0.333326	0.830733
BRCA1	BRCA1	672	BRCAI|BRCC1|BROVCA1|FANCS|IRIS|PNCA4|PPP1R53|PSCP|RNF53	breast cancer 1_ early onset	8.51772	5.58053	5.69245	3.86323	1.35542	3.12357	6.55064	1.77839	23.5515	-2.15571	0.100045	0.830733
BRCA2	BRCA2	675	BRCC2|BROVCA2|FACD|FAD|FAD1|FANCD|FANCD1|GLM3|PNCA2|XRCC11	breast cancer 2_ early onset	5.81728	4.67364	5.41682	5.19525	5.82377	4.0805	4.67617	5.00079	33.9544	0.392317	0.72007	0.924388
BRIP1	BRIP1	83990	BACH1|FANCJ|OF	BRCA1 interacting protein C-terminal helicase 1	5.81728	5.37408	6.45429	5.40103	6.86753	4.06586	6.9981	5.11943	54.2744	0.794681	0.422555	0.833614
BRMS1	BRMS1	25855	-	breast cancer metastasis suppressor 1	4.81728	4.67364	4.16889	5.44397	4.56841	5.15159	5.67617	4.93759	30.4779	0.704015	0.418336	0.833614
BTK	BTK	695	AGMX1|AT|ATK|BPK|IMD1|PSCTK1|XLA	Bruton agammaglobulinemia tyrosine kinase	4.81728	4.67364	4.75385	3.92516	1.98345	2.58043	5.0912	2.62639	13.991	-1.3388	0.100572	0.830733
BUB1	BUB1	699	BUB1A|BUB1L|hBUB1	BUB1 mitotic checkpoint serine/threonine kinase	4.81728	5.13308	6.66074	5.64137	5.77251	5.45677	6.67617	7.07363	59.8775	0.887525	0.346229	0.830733
BUB1B	BUB1B	701	BUB1beta|BUBR1|Bub1A|MAD3L|MVA1|SSK1|hBUBR1	BUB1 mitotic checkpoint serine/threonine kinase B	4.81728	4.99557	5.81275	4.79852	4.92941	3.82619	5.0912	6.14297	33.1684	0.353637	0.755271	0.9381
BYSL	BYSL	705	BYSTIN	bystin-like	6.40224	6.3175	4.97625	5.78856	5.49961	5.47352	5.89856	6.19793	56.4645	0.376148	0.668671	0.89879
C3AR1	C3AR1	719	AZ3B|C3AR|HNFAG09	complement component 3a receptor 1	7.13921	4.25861	4.62832	4.71684	3.04574	4.45115	4.0912	3.72949	22.7464	-0.0655883	0.945695	0.987561
CA9	CA9	768	CAIX|MN	carbonic anhydrase IX	7.81728	4.25861	6.25635	-0.162304	3.35542	2.73655	6.67617	4.17529	20.9542	-0.570012	0.632679	0.884799
CACYBP	CACYBP	27101	GIG5|PNAS-107|S100A6BP|SIP	calcyclin binding protein	4.81728	7.40156	7.41682	7.56075	7.79081	6.72727	8.33913	7.30405	143.978	1.95508	0.336681	0.830733
CALML3	CALML3	810	CLP	calmodulin-like 3	4.81728	1.67364	1.16889	1.73078	-0.296657	1.2585	3.0912	0.678859	3.39948	-0.134773	0.777359	0.948055
CARD11	CARD11	84433	BENTA|BIMP3|CARMA1|IMD11|PPBL	caspase recruitment domain family_ member 11	5.81728	3.25861	2.75385	2.86323	1.06591	1.97471	4.0912	1.19343	7.34763	-0.152003	0.857248	0.978446
CASP3	CASP3	836	CPP32|CPP32B|SCA-1	caspase 3_ apoptosis-related cysteine peptidase	6.40224	5.99557	5.92378	6.27351	5.92113	6.17566	5.41313	5.93759	64.2368	0.646545	0.726516	0.927459
CAV1	CAV1	857	BSCL3|CGL3|LCCNS|MSTP085|PPH3|VIP21	caveolin 1_ caveolae protein_ 22kDa	8.27671	6.19721	6.45429	6.14668	5.41562	6.24881	8.0912	5.10032	89.9691	0.0846624	0.895489	0.986676
CBX2	CBX2	84733	CDCA6|M33|SRXY5	chromobox homolog 2	4.81728	5.481	5.92378	4.75144	6.15573	6.5907	6.79164	6.40289	58.2549	1.5805	0.0539877	0.830733
CCL13	CCL13	6357	CKb10|MCP-4|NCC-1|NCC1|SCYA13|SCYL1	chemokine (C-C motif) ligand 13	6.40224	5.58053	4.16889	3.33412	-0.782084	-0.548852	5.0912	2.8715	9.61106	-2.3505	0.0666429	0.830733
CCL19	CCL19	6363	CKb11|ELC|MIP-3b|MIP3B|SCYA19	chemokine (C-C motif) ligand 19	6.81728	3.99557	2.75385	6.96551	4.67078	4.40534	5.0912	4.79037	30.6165	1.45753	0.500082	0.861393
CCL2	CCL2	6347	GDCF-2|HC11|HSMCR30|MCAF|MCP-1|MCP1|SCYA2|SMC-CF	chemokine (C-C motif) ligand 2	5.81728	7.76111	7.67669	8.5262	5.65421	8.24312	6.67617	5.69168	128.516	-0.708951	0.54724	0.861393
CCL21	CCL21	6366	6Ckine|CKb9|ECL|SCYA21|SLC|TCA4	chemokine (C-C motif) ligand 21	7.9872	5.58053	5.16889	4.51416	3.14392	3.791	6.41313	1.57194	27.3098	-1.37851	0.15077	0.830733
CCL4	CCL4	6351	ACT2|AT744.1|G-26|HC21|LAG-1|LAG1|MIP-1-beta|MIP1B|MIP1B1|SCYA2|SCYA4	chemokine (C-C motif) ligand 4	7.40224	5.13308	5.62832	6.20277	2.45058	5.80429	6.41313	3.84878	41.081	-0.300305	0.688095	0.904493
CCL5	CCL5	6352	D17S136E|RANTES|SCYA5|SIS-delta|SISd|TCP228|eoCP	chemokine (C-C motif) ligand 5	6.40224	7.53162	6.89681	8.31574	5.45823	4.16539	7.48352	6.27238	94.7296	-1.0923	0.348825	0.830733
CCNA2	CCNA2	890	CCN1|CCNA	cyclin A2	4.81728	4.67364	4.16889	5.32036	4.77863	3.71793	5.0912	6.26811	28.9302	0.987722	0.420924	0.833614
CCNB1	CCNB1	891	CCNB	cyclin B1	6.40224	5.92157	6.29817	6.54604	6.38584	6.53861	7.41313	7.32272	97.2442	2.28338	0.188909	0.830733
CCNB2	CCNB2	9133	HsT17299	cyclin B2	8.81728	6.19721	7.09963	5.66334	5.43902	4.89409	7.41313	7.27877	97.0266	-0.572856	0.440822	0.839259
CCND1	CCND1	595	BCL1|D11S287E|PRAD1|U21B31	cyclin D1	7.81728	5.84357	8.12309	5.37464	4.74148	7.85203	8.1356	8.86727	136.653	1.18456	0.20197	0.830733
CCND2	CCND2	894	KIAK0002|MPPH3	cyclin D2	6.40224	6.76111	5.86933	4.86323	3.23584	4.50643	6.79164	3.22906	36.9463	-0.610498	0.570925	0.861393
CCNE1	CCNE1	898	CCNE|pCCNE1	cyclin E1	5.81728	4.84357	5.62832	4.30647	5.68715	3.20604	6.55064	5.03138	35.1111	1.02975	0.240715	0.830733
CCNF	CCNF	899	FBX1|FBXO1	cyclin F	8.27671	6.71804	6.25635	5.99324	5.28831	6.1022	7.41313	6.53328	95.1847	-0.187733	0.666347	0.89879
CCNK	CCNK	8812	CPR4	cyclin K	6.81728	5.92157	7.35872	7.04715	6.42151	7.72378	6.0912	6.71699	108.554	0.376505	0.719719	0.924388
CCNT1	CCNT1	904	CCNT|CYCT1|HIVE1	cyclin T1	8.51772	6.80293	7.05153	5.79521	5.74461	6.49827	7.67617	6.5545	113.781	-0.282639	0.550659	0.861393
CCR1	CCR1	1230	CD191|CKR-1|CKR1|CMKBR1|HM145|MIP1aR|SCYAR1	chemokine (C-C motif) receptor 1	7.9872	5.76111	5.25635	5.5539	3.37172	4.095	6.67617	3.8257	39.8331	-1.03395	0.155542	0.830733
CCR2	CCR2	729230	CC-CKR-2|CCR-2|CCR2A|CCR2B|CD192|CKR2|CKR2A|CKR2B|CMKBR2|MCP-1-R	chemokine (C-C motif) receptor 2	7.62463	4.99557	5.97625	4.70277	1.75397	1.91058	6.55064	1.77839	21.2826	-1.13955	0.28054	0.830733
CCR4	CCR4	1233	CC-CKR-4|CD194|CKR4|CMKBR4|ChemR13|HGCN:14099|K5-5	chemokine (C-C motif) receptor 4	7.13921	5.25861	4.62832	3.5695	2.14392	2.58043	5.67617	2.77839	18.6592	-0.756729	0.314301	0.830733
CCR5	CCR5	1234	CC-CKR-5|CCCKR5|CCR-5|CD195|CKR-5|CKR5|CMKBR5|IDDM22	chemokine (C-C motif) receptor 5 (gene/pseudogene)	6.81728	5.67364	5.56121	5.1231	2.67735	3.33379	6.0912	3.89387	29.7833	-0.834576	0.339082	0.830733
CCR7	CCR7	1236	BLR2|CC-CKR-7|CCR-7|CD197|CDw197|CMKBR7|EBI1	chemokine (C-C motif) receptor 7	5.81728	4.481	4.86933	4.38789	2.80288	2.2585	5.89856	3.04143	18.3106	-0.232661	0.766015	0.942317
CCS	CCS	9973	-	copper chaperone for superoxide dismutase	4.81728	5.99557	6.41682	6.64689	5.89599	7.12887	6.41313	5.94297	71.3672	0.45474	0.61535	0.87861
CD14	CD14	929	-	CD14 molecule	7.81728	7.3175	7.43568	7.23124	5.80288	5.93093	7.26113	5.81402	113.483	-0.887661	0.0292029	0.830733
CD163	CD163	9332	M130|MM130	CD163 molecule	6.81728	7.58053	7.19126	7.59258	5.75397	6.68716	7.0912	6.02125	114.715	0.730227	0.708418	0.91983
CD19	CD19	930	B4|CVID3	CD19 molecule	5.81728	4.99557	4.62832	4.79189	1.53984	1.69908	5.67617	3.15691	16.4285	-1.12776	0.197567	0.830733
CD209	CD209	30835	CDSIGN|CLEC4L|DC-SIGN|DC-SIGN1	CD209 molecule	5.81728	1.67364	2.75385	2.15962	1.41955	1.35804	3.0912	1.45647	5.52589	0.351305	0.56618	0.861393
CD22	CD22	933	SIGLEC-2|SIGLEC2	CD22 molecule	4.81728	1.67364	1.16889	3.99612	1.14392	1.45115	4.0912	2.33094	5.99659	-1.078	0.348264	0.830733
CD244	CD244	51744	2B4|NAIL|NKR2B4|Nmrk|SLAMF4	CD244 molecule_ natural killer cell receptor 2B4	4.81728	1.67364	2.75385	2.42266	-2.10401	-0.226924	3.0912	1.57194	3.36348	-0.263815	0.700825	0.911562
CD247	CD247	919	CD3-ZETA|CD3H|CD3Q|CD3Z|IMD25|T3Z|TCRZ	CD247 molecule	7.62463	4.67364	4.16889	3.64505	0.895988	0.0361101	3.0912	1.67886	9.36188	-3.66297	0.00594929	0.830733
CD27	CD27	939	S152|S152. LPFS2|T14|TNFRSF7|Tp55	CD27 molecule	6.40224	6.19721	5.62832	6.35001	3.32225	3.53861	3.0912	4.13829	28.5124	-1.65373	0.377763	0.830733
CD274	CD274	29126	B7-H|B7H1|PD-L1|PDCD1L1|PDCD1LG1|PDL1	CD274 molecule	8.13921	4.67364	4.33882	4.32496	1.98345	2.2585	5.89856	2.77839	19.6907	-2.28011	0.0531838	0.830733
CD276	CD276	80381	4Ig-B7-H3|B7-H3|B7H3|B7RP-2	CD276 molecule	5.81728	7.3175	8.16889	7.05132	7.33478	8.30368	7.55064	7.33707	164.295	1.96163	0.340124	0.830733
CD28	CD28	940	Tp44	CD28 molecule	7.62463	4.84357	5.25635	4.77853	2.96208	2.943	5.67617	3.95897	27.0098	-1.44057	0.0110652	0.830733
CD300A	CD300A	11314	CLM-8|CMRF-35-H9|CMRF-35H|CMRF35-H|CMRF35-H9|CMRF35H|CMRF35H9|IGSF12|IRC1|IRC1/IRC2|IRC2|IRp60	CD300a molecule	5.81728	4.481	5.75385	5.21025	3.87327	4.43983	5.41313	4.558	30.7673	-0.505235	0.589558	0.873549
CD33	CD33	945	SIGLEC-3|SIGLEC3|p67	CD33 molecule	5.81728	2.67364	3.49082	2.31574	0.983451	1.03611	3.0912	1.45647	6.09696	0.0808756	0.895867	0.986676
CD34	CD34	947	-	CD34 molecule	4.81728	4.67364	5.62832	6.13363	5.33893	6.03235	6.0912	4.81402	43.4466	0.441838	0.618733	0.87861
CD38	CD38	952	ADPRC 1|ADPRC1	CD38 molecule	4.81728	4.67364	6.21328	5.68855	2.32225	2.40534	4.0912	3.42609	18.4392	-2.58496	0.0416268	0.830733
CD3D	CD3D	915	CD3-DELTA|IMD19|T3D	CD3d molecule_ delta (CD3-TCR complex)	5.81728	4.67364	4.62832	5.98744	3.38784	2.69908	6.41313	4.11943	26.2778	-0.153805	0.880813	0.984565
CD3E	CD3E	916	IMD18|T3E|TCRE	CD3e molecule_ epsilon (CD3-TCR complex)	7.9872	5.25861	4.86933	5.07473	2.53984	2.6606	5.41313	3.15691	24.5908	-2.93587	0.00347709	0.830733
CD3G	CD3G	917	CD3-GAMMA|IMD17|T3G	CD3g molecule_ gamma (CD3-TCR complex)	6.81728	5.67364	5.33882	4.6002	2.18139	2.095	5.89856	2.57194	21.0698	-1.40439	0.158035	0.830733
CD4	CD4	920	CD4mut	CD4 molecule	4.81728	6.19721	6.07578	6.06101	4.26231	4.64097	6.0912	4.79037	41.2698	0.193474	0.900653	0.986676
CD40	CD40	958	Bp50|CDW40|TNFRSF5|p50	CD40 molecule_ TNF receptor superfamily member 5	8.90474	7.53162	6.97625	6.47536	4.14392	4.78206	7.55064	6.43756	97.0239	-1.33121	0.0962226	0.830733
CD40LG	CD40LG	959	CD154|CD40L|HIGM1|IGM|IMD3|T-BAM|TNFSF5|TRAP|gp39|hCD40L	CD40 ligand	7.13921	4.84357	3.75385	3.20027	0.480951	1.45115	5.89856	1.67886	11.7599	0.0544478	0.962522	0.988866
CD44	CD44	960	CDW44|CSPG8|ECMR-III|HCELL|HUTCH-I|IN|LHR|MC56|MDU2|MDU3|MIC4|Pgp1	CD44 molecule (Indian blood group)	7.40224	8.3175	8.48177	8.15252	6.78168	9.5027	8.1356	7.72637	267.343	0.437219	0.605819	0.873549
CD47	CD47	961	IAP|MER6|OA3	CD47 molecule	4.81728	7.13308	7.92378	7.49591	7.40576	7.34748	7.89856	6.25521	131.11	1.5779	0.436859	0.839259
CD53	CD53	963	MOX44|TSPAN25	CD53 molecule	5.81728	6.8831	7.27742	7.97212	5.59296	6.48732	5.67617	6.31445	90.673	0.052729	0.979271	0.989915
CD6	CD6	923	TP120	CD6 molecule	6.40224	4.67364	5.56121	4.74459	2.85018	2.87741	6.0912	2.62639	22.2905	-0.565597	0.533459	0.861393
CD68	CD68	968	GP110|LAMP4|SCARD1	CD68 molecule	5.81728	7.19721	7.64462	8.18642	6.25793	7.23415	7.26113	6.52256	129.352	1.01211	0.617917	0.87861
CD80	CD80	941	B7|B7-1|B7.1|BB1|CD28LG|CD28LG1|LAB7	CD80 molecule	6.81728	4.84357	4.75385	5.03597	2.56841	3.55967	3.0912	4.08096	20.3064	-0.889817	0.348516	0.830733
CD84	CD84	8832	LY9B|SLAMF5|hCD84|mCD84	CD84 molecule	8.62463	6.84357	6.81275	6.6153	4.4959	5.63106	7.48352	5.04143	87.0348	-1.15141	0.0954312	0.830733
CD86	CD86	942	B7-2|B7.2|B70|CD28LG2|LAB72	CD86 molecule	6.81728	4.84357	3.97625	3.87583	2.35542	3.62107	5.0912	3.04143	18.4143	-0.387023	0.648741	0.889931
CD8A	CD8A	925	CD8|Leu2|MAL|p32	CD8a molecule	5.81728	3.67364	4.97625	5.93422	3.45058	3.03611	4.0912	4.02125	20.7504	-1.18763	0.358256	0.830733
CD8B	CD8B	926	CD8B1|LEU2|LY3|LYT3|P37	CD8b molecule	6.81728	4.67364	5.41682	5.22017	4.81485	2.45115	6.26113	3.42609	29.5511	-8.29e-16	1	1
CDC20	CDC20	991	CDC20A|bA276H19.3|p55CDC	cell division cycle 20	4.81728	4.99557	6.21328	6.02752	6.22242	4.95099	6.79164	7.06133	59.0967	1.0863	0.256051	0.830733
CDC25A	CDC25A	993	CDC25A2	cell division cycle 25A	7.9872	5.99557	5.81275	4.70277	4.20887	5.14463	6.0912	5.08096	49.4533	-0.936435	0.0607562	0.830733
CDC25C	CDC25C	995	CDC25|PPP1R60	cell division cycle 25C	5.81728	3.99557	4.16889	1.98454	3.53984	1.77308	4.0912	2.72949	11.4121	0.691878	0.372563	0.830733
CDCA5	CDCA5	113130	SORORIN	cell division cycle associated 5	7.13921	5.37408	5.62832	6.54012	6.06591	5.31533	7.33913	7.01106	78.8832	1.17093	0.22404	0.830733
CDCA8	CDCA8	55143	BOR|BOREALIN|DasraB|MESRGP	cell division cycle associated 8	4.81728	4.84357	5.33882	5.39666	5.21792	4.49554	4.0912	6.12889	32.9278	0.584963	0.601917	0.873549
CDCP1	CDCP1	64866	CD318|SIMA135|TRASK	CUB domain containing protein 1	6.40224	4.84357	5.86933	5.08562	4.99402	6.39366	6.41313	6.31445	55.3113	1.3339	0.124468	0.830733
CDH1	CDH1	999	Arc-1|CD324|CDHE|ECAD|LCAM|UVO	cadherin 1_ type 1	4.81728	6.42853	6.66074	7.41512	6.61538	7.49281	6.67617	6.73878	97.3832	1.69153	0.363351	0.830733
CDH11	CDH11	1009	CAD11|CDHOB|OB|OSF-4	cadherin 11_ type 2_ OB-cadherin (osteoblast)	5.81728	6.67364	7.85539	7.30414	6.4959	7.22593	6.89856	5.89387	109.182	1.09766	0.571947	0.861393
CDH5	CDH5	1003	7B4|CD144	cadherin 5_ type 2 (vascular endothelium)	6.40224	3.67364	3.16889	3.91298	3.18139	3.82619	5.0912	2.04143	15.0558	0.63743	0.568568	0.861393
CDK1	CDK1	983	CDC2|CDC28A|P34CDC2	cyclin-dependent kinase 1	7.13921	5.76111	6.16889	6.57531	6.5308	5.43983	6.41313	6.63306	80.5977	0.519716	0.556272	0.861393
CDK12	CDK12	51755	CRK7|CRKR|CRKRS	cyclin-dependent kinase 12	9.06521	6.95905	7.00178	6.81006	6.85018	6.71324	7.94919	6.39898	148.927	-0.49304	0.343161	0.830733
CDK2	CDK2	1017	CDKN2|p33(CDK2)	cyclin-dependent kinase 2	5.81728	6.99557	6.89681	7.04993	8.39434	6.15505	7.17867	7.23125	124.92	1.97097	0.311579	0.830733
CDK4	CDK4	1019	CMM3|PSK-J3	cyclin-dependent kinase 4	6.81728	7.53162	7.56121	7.76251	7.9232	7.49827	7.33913	8.15575	190.497	1.96851	0.34174	0.830733
CDK6	CDK6	1021	MCPH12|PLSTIRE	cyclin-dependent kinase 6	7.13921	6.8831	6.33882	4.96698	7.79459	7.13414	6.55064	7.0539	106.35	1.42118	0.160497	0.830733
CDKN1A	CDKN1A	1026	CAP20|CDKN1|CIP1|MDA-6|P21|SDI1|WAF1|p21CIP1	cyclin-dependent kinase inhibitor 1A (p21_ Cip1)	7.81728	7.1655	7.29817	6.31574	4.65088	7.03799	7.48352	6.73878	112.477	-0.086831	0.860086	0.978446
CDKN2A	CDKN2A	1029	ARF|CDK4I|CDKN2|CMM2|INK4|INK4A|MLM|MTS-1|MTS1|P14|P14ARF|P16|P16-INK4A|P16INK4|P16INK4A|P19|P19ARF|TP16	cyclin-dependent kinase inhibitor 2A	8.51772	6.67364	5.16889	3.50607	4.35542	2.49554	7.26113	-0.128496	26.5611	-1.26133	0.348067	0.830733
CEACAM1	CEACAM1	634	BGP|BGP1|BGPI	carcinoembryonic antigen-related cell adhesion molecule 1 (biliary glycoprotein)	6.81728	6.84357	5.16889	6.01048	4.41169	4.38188	5.41313	3.75415	40.7897	-1.71187	0.122205	0.830733
CEACAM3	CEACAM3	1084	CD66D|CEA|CGM1|W264|W282	carcinoembryonic antigen-related cell adhesion molecule 3	6.40224	3.99557	4.33882	1.42266	-0.782084	-0.226924	6.0912	0.193432	6.40574	1.34395	0.322907	0.830733
CENPA	CENPA	1058	CENP-A|CenH3	centromere protein A	4.81728	3.25861	4.86933	4.68855	4.05586	2.91058	4.0912	5.03138	18.5757	0.347923	0.767231	0.942317
CFLAR	CFLAR	8837	CASH|CASP8AP1|CLARP|Casper|FLAME|FLAME-1|FLAME1|FLIP|I-FLICE|MRIT|c-FLIP|c-FLIPL|c-FLIPR|c-FLIPS	CASP8 and FADD-like apoptosis regulator	4.81728	5.76111	6.12309	5.87896	4.89034	6.17225	5.67617	5.66592	49.2871	0.0629313	0.943728	0.987529
CGAS	CGAS	115004	C6orf150|cGAS|h-cGAS|MB21D1	Mab-21 domain containing 1	4.81728	6.06596	6.29817	6.56756	4.85599	3.89409	6.26113	5.00079	44.3272	0.144747	0.929479	0.986676
CHD8	CHD8	57680	AUTS18|HELSNF1	chromodomain helicase DNA binding protein 8	9.13921	6.06596	7.16889	6.39228	5.55062	6.65816	7.61477	5.50086	108.484	-0.956184	0.200978	0.830733
CHEK1	CHEK1	1111	CHK1	checkpoint kinase 1	7.13921	5.92157	5.16889	5.86639	6.22242	5.17225	6.26113	6.72637	66.7076	0.960626	0.273486	0.830733
CHEK2	CHEK2	11200	CDS1|CHK2|HuCds1|LFS2|PP1425|RAD53|hCds1	checkpoint kinase 2	4.81728	4.99557	4.75385	4.23001	5.37577	4.95894	5.0912	5.22023	30.492	0.810269	0.640914	0.88632
CHMP2A	CHMP2A	27243	BC-2|BC2|CHMP2|VPS2|VPS2A	charged multivesicular body protein 2A	8.81728	6.92157	7.66074	7.06239	6.95938	7.38336	7.89856	6.60282	170.457	-0.31208	0.400596	0.833614
CHUK	CHUK	1147	IKBKA|IKK-alpha|IKK1|IKKA|NFKBIKA|TCF16	conserved helix-loop-helix ubiquitous kinase	5.81728	6.06596	5.33882	6.43548	4.72888	6.35804	6.41313	5.42609	56.609	0.229734	0.79421	0.953623
CLOCK	CLOCK	9575	KAT13D|bHLHe8	clock circadian regulator	7.40224	4.84357	5.62832	4.19021	3.86177	6.52529	5.67617	4.13829	38.9414	0.628031	0.39065	0.832055
CLSPN	CLSPN	63967	-	claspin	6.40224	5.25861	4.97625	5.77517	5.6205	3.97471	6.41313	5.55098	45.1436	0.679911	0.415839	0.833614
CMKLR1	CMKLR1	1240	CHEMERINR|ChemR23|DEZ|RVER1	chemerin chemokine-like receptor 1	6.40224	5.37408	4.16889	5.56562	3.8385	4.23251	6.41313	4.44136	33.2329	0.286304	0.751389	0.9381
COL4A1	COL4A1	1282	BSVD|RATOR	collagen_ type IV_ alpha 1	4.81728	7.69601	7.12309	5.90378	6.71297	6.23905	6.79164	5.17529	79.1979	0.946979	0.612523	0.876379
COL4A2	COL4A2	1284	ICH|POREN2	collagen_ type IV_ alpha 2	5.81728	9.40835	7.81275	7.24951	8.29206	7.44833	6.79164	6.68208	173.375	-0.642721	0.586531	0.873549
COL6A1	COL6A1	1291	OPLL	collagen_ type VI_ alpha 1	6.81728	9.39474	10.2023	7.5539	8.68144	8.48663	9.32002	7.90079	373.416	1.79763	0.471674	0.844049
COL6A2	COL6A2	1292	PP3610	collagen_ type VI_ alpha 2	8.13921	7.71804	8.38806	6.05271	7.07216	6.98448	7.26113	6.25952	150.583	-0.666832	0.17098	0.830733
COL6A3	COL6A3	1293	DYT27	collagen_ type VI_ alpha 3	8.13921	8.58053	9.99544	8.31111	8.78929	10.075	9.26113	8.08946	479.421	0.375163	0.563605	0.861393
COP1	COP1	NA	NA	NA	5.81728	5.67364	6.16889	6.35902	7.3798	7.10936	6.79164	6.37533	87.9963	2.38937	0.162804	0.830733
COX5B	COX5B	1329	COXVB	cytochrome c oxidase subunit Vb	6.40224	7.90246	9.1857	8.35677	7.44192	9.08414	8.64579	8.15343	283.373	1.96172	0.397945	0.833614
CPA3	CPA3	1359	MC-CPA	carboxypeptidase A3 (mast cell)	8.40224	5.99557	5.25635	2.38789	2.35542	3.17907	6.67617	1.04143	21.285	-1.76231	0.195225	0.830733
CPT2	CPT2	1376	CPT1|CPTASE|IIAE4	carnitine palmitoyltransferase 2	8.13921	5.58053	5.16889	5.62653	4.54704	5.02858	6.79164	4.61297	51.5151	-0.650339	0.305435	0.830733
CREB1	CREB1	1385	CREB	cAMP responsive element binding protein 1	4.81728	5.481	6.49082	6.00188	5.90442	6.63602	5.67617	6.22465	59.8811	0.499571	0.605057	0.873549
CREBBP	CREBBP	1387	CBP|KAT3A|RSTS	CREB binding protein	5.81728	5.481	6.41682	5.84091	5.32225	6.20604	4.0912	6.32272	51.5277	0.212942	0.921772	0.986676
CRK	CRK	1398	CRKII|p38	v-crk avian sarcoma virus CT10 oncogene homolog	8.13921	6.25861	6.66074	5.49795	4.52534	5.63106	7.0912	5.21135	69.8861	-0.666646	0.204979	0.830733
CSF1R	CSF1R	1436	C-FMS|CD115|CSF-1R|CSFR|FIM2|FMS|HDLS|M-CSF-R	colony stimulating factor 1 receptor	8.13921	7.3175	7.16889	6.46497	5.45058	6.26813	7.55064	5.8257	109.38	-0.6099	0.143528	0.830733
CSF2RA	CSF2RA	1438	CD116|CDw116|CSF2R|CSF2RAX|CSF2RAY|CSF2RX|CSF2RY|GM-CSF-R-alpha|GMCSFR|GMR|SMDP4	colony stimulating factor 2 receptor_ alpha_ low-affinity (granulocyte-macrophage)	4.81728	6.76111	5.07578	5.69568	4.80288	5.53861	6.55064	4.57194	44.531	-0.152952	0.865195	0.979699
CSF2RB	CSF2RB	1439	CD131|CDw131|IL3RB|IL5RB|SMDP5	colony stimulating factor 2 receptor_ beta_ low-affinity (granulocyte-macrophage)	4.81728	6.62784	4.75385	5.53417	2.75397	3.17907	5.0912	3.42609	22.99	-2.49923	0.049197	0.830733
CSF3R	CSF3R	1441	CD114|GCSFR	colony stimulating factor 3 receptor (granulocyte)	8.27671	6.06596	5.16889	5.68855	3.28831	5.78206	7.0912	3.39507	48.3215	-0.738642	0.404192	0.833614
CTLA4	CTLA4	1493	ALPS5|CD|CD152|CELIAC3|CTLA-4|GRD4|GSE|IDDM12	cytotoxic T-lymphocyte-associated protein 4	8.13921	6.13308	5.07578	5.08562	3.46584	2.40534	5.67617	4.00079	31.9497	-2.45943	0.0055695	0.830733
CTNNA1	CTNNA1	1495	CAP102	catenin (cadherin-associated protein)_ alpha 1_ 102kDa	5.81728	8.18144	8.24571	7.43655	9.1323	9.53861	8.30066	8.35229	279.287	2.8505	0.20641	0.830733
CTNNB1	CTNNB1	1499	CTNNB|MRD19|armadillo	catenin (cadherin-associated protein)_ beta 1_ 88kDa	6.40224	8.84357	9.53958	9.45844	8.98146	10.5413	10.2611	10.2503	623.719	3.05342	0.240777	0.830733
CTNND1	CTNND1	1500	CAS|CTNND|P120CAS|P120CTN|p120|p120(CAS)|p120(CTN)	catenin (cadherin-associated protein)_ delta 1	7.40224	6.481	7.45429	6.6939	7.63661	8.11559	7.26113	7.22244	155.784	1.04354	0.106478	0.830733
CTSW	CTSW	1521	LYPN	cathepsin W	6.40224	4.481	3.16889	5.05271	2.45058	2.45115	5.89856	3.67886	18.3537	1.1e-15	1	1
CXCL10	CXCL10	3627	C7|IFI10|INP10|IP-10|SCYB10|crg-2|gIP-10|mob-1	chemokine (C-X-C motif) ligand 10	8.9872	9.01349	8.72348	9.02928	6.73362	5.45115	8.92409	8.10752	278.441	-1.04083	0.128597	0.830733
CXCL11	CXCL11	6373	H174|I-TAC|IP-9|IP9|SCYB11|SCYB9B|b-R1	chemokine (C-X-C motif) ligand 11	5.81728	6.3175	5.97625	6.68498	4.32225	3.58043	5.41313	5.44136	43.5363	-1.47758	0.185771	0.830733
CXCL9	CXCL9	4283	CMK|Humig|MIG|SCYB9|crg-10	chemokine (C-X-C motif) ligand 9	7.81728	7.34607	8.37834	9.24921	7.01233	5.74117	8.79164	7.65614	215.124	-0.547873	0.475802	0.846881
CXCR2	CXCR2	3579	CD182|CDw128b|CMKAR2|IL8R2|IL8RA|IL8RB	chemokine (C-X-C motif) receptor 2	7.62463	5.25861	4.75385	2.45661	-0.782084	1.69908	6.9981	0.871504	12.2104	0.0627358	0.963613	0.988866
CXCR4	CXCR4	7852	CD184|D2S201E|FB22|HM89|HSY3RR|LAP-3|LAP3|LCR1|LESTR|NPY3R|NPYR|NPYRL|NPYY3R|WHIM|WHIMS	chemokine (C-X-C motif) receptor 4	7.81728	7.97742	6.7836	7.20776	7.05081	5.92688	8.1356	7.71856	160.59	0.211622	0.672663	0.89879
CXCR6	CXCR6	10663	BONZO|CD186|STRL33|TYMSTR	chemokine (C-X-C motif) receptor 6	7.62463	3.67364	3.49082	4.26875	0.983451	1.69908	4.67617	2.45647	12.2027	-2.60666	0.0638491	0.830733
CXXC5	CXXC5	51523	CF5|HSPC195|RINF|WID	CXXC finger protein 5	4.81728	5.67364	6.02687	5.39666	4.4959	6.24231	5.41313	4.11943	38.6703	-0.172639	0.867125	0.979699
CYBB	CYBB	1536	AMCBX2|CGD|GP91-1|GP91-PHOX|GP91PHOX|IMD34|NOX2|p91-PHOX	cytochrome b-245_ beta polypeptide	6.40224	7.50653	7.93708	8.02186	5.9128	5.99031	6.67617	6.39114	115.742	0.247276	0.903092	0.986676
CYFIP1	CYFIP1	23191	P140SRA-1|SHYC|SRA-1|SRA1	cytoplasmic FMR1 interacting protein 1	6.81728	6.67364	7.27742	6.60588	7.33893	7.34597	6.89856	7.30613	130.959	2.0241	0.281256	0.830733
CYP4A11/22	CYP4A11/22	NA	NA	NA	7.62463	5.13308	4.62832	-0.969659	-1.10401	2.62107	5.67617	0.456467	8.04593	-1.94753	0.109118	0.830733
DCN	DCN	1634	CSCD|DSPG2|PG40|PGII|PGS2|SLRR1B	decorin	4.81728	8.94043	10.0206	8.8953	8.47483	9.50134	8.79164	8.17414	350.18	1.75237	0.483744	0.848774
DICER1	DICER1	23405	DCR1|Dicer|Dicer1e|HERNA|K12H4.8-LIKE|MNG1|RMSE2	dicer 1_ ribonuclease type III	6.40224	6.3175	7.19126	7.13887	6.65421	7.63106	6.79164	6.49356	113.578	1.67463	0.371403	0.830733
DKC1	DKC1	1736	CBF5|DKC|DKCX|NAP57|NOLA4|XAP101	dyskeratosis congenita 1_ dyskerin	5.81728	4.25861	4.49082	4.80513	4.77251	4.37001	4.0912	5.71071	27.6562	1.18442	0.29303	0.830733
DLL3	DLL3	10683	SCDO1	delta-like 3 (Drosophila)	6.81728	3.99557	3.16889	0.615303	3.33893	1.69908	6.0912	1.77839	10.8384	3.20163	0.0183676	0.830733
DNA2	DNA2	1763	DNA2L|hDNA2	DNA replication helicase/nuclease 2	4.81728	4.99557	5.25635	5.76843	5.86465	3.73655	3.0912	5.29777	28.9096	0.165059	0.884637	0.985583
DNMT1	DNMT1	1786	ADCADN|AIM|CXXC9|DNMT|HSN1E|MCMT	DNA (cytosine-5-)-methyltransferase 1	8.13921	7.40156	7.07578	7.72905	8.22578	6.82401	7.67617	7.5615	191.226	0.305076	0.341771	0.830733
DOCK1	DOCK1	1793	DOCK180|ced5	dedicator of cytokinesis 1	6.40224	7.40156	6.59516	6.55782	6.3472	7.44267	6.67617	6.96954	111.357	1.62744	0.38234	0.830733
DOCK2	DOCK2	1794	IMD40	dedicator of cytokinesis 2	6.40224	5.76111	6.49082	6.86797	4.59643	5.08777	5.89856	5.12889	54.9186	0.171243	0.9173	0.986676
DTL	DTL	51514	CDT2|DCAF2|L2DTL|RAMP	denticleless E3 ubiquitin protein ligase homolog (Drosophila)	7.13921	5.13308	4.86933	5.15446	5.55777	4.51724	6.67617	5.54393	47.6332	1.27436	0.104537	0.830733
DUSP6	DUSP6	1848	HH19|MKP3|PYST1	dual specificity phosphatase 6	4.81728	4.99557	5.16889	5.99612	5.05586	5.76856	5.41313	4.47142	37.036	0.0922585	0.926128	0.986676
E2F1	E2F1	1869	E2F-1|RBAP1|RBBP3|RBP3	E2F transcription factor 1	4.81728	4.25861	4.62832	6.70277	5.53984	4.69908	6.0912	5.57194	39.0874	0.276654	0.798531	0.953623
E2F2	E2F2	1870	E2F-2	E2F transcription factor 2	6.40224	1.67364	4.86933	3.09643	1.65088	0.258502	5.0912	2.04143	8.78753	-1.58496	0.154706	0.830733
EDN1	EDN1	1906	ARCND3|ET1|HDLCQ7|PPET1|QME	endothelin 1	4.81728	3.99557	4.97625	4.13887	3.94038	4.50643	4.67617	4.57194	21.9	0.645335	0.534772	0.861393
EGF	EGF	1950	HOMG4|URG	epidermal growth factor	4.81728	3.25861	3.49082	2.6153	2.18139	1.77308	3.0912	4.21135	9.06231	1.53051	0.173689	0.830733
EGFR	EGFR	1956	ERBB|ERBB1|HER1|NISBD2|PIG61|mENA	epidermal growth factor receptor	4.81728	4.99557	4.49082	4.37907	2.91836	3.40534	6.0912	5.40289	23.6303	0.861024	0.304696	0.830733
EGLN3	EGLN3	112399	HIFP4H3|HIFPH3|PHD3	egl-9 family hypoxia-inducible factor 3	4.81728	3.67364	5.97625	2.96108	2.77863	5.68955	5.67617	4.33094	22.4391	0.584963	0.628431	0.882175
EHHADH	EHHADH	1962	ECHD|FRTS3|L-PBE|LBFP|LBP|PBFE	enoyl-CoA_ hydratase/3-hydroxyacyl CoA dehydrogenase	6.40224	3.25861	4.49082	3.6002	2.85018	2.8087	3.0912	3.19343	13.1039	9.34e-17	1	1
EIF2AK3	EIF2AK3	9451	PEK|PERK|WRS	eukaryotic translation initiation factor 2-alpha kinase 3	4.81728	3.99557	4.97625	4.87583	4.11516	5.2777	4.0912	4.41066	23.7517	0.594361	0.601224	0.873549
EIF4EBP1	EIF4EBP1	1978	4E-BP1|4EBP1|BP-1|PHAS-I	eukaryotic translation initiation factor 4E binding protein 1	6.40224	6.95905	7.41682	6.15962	7.49776	7.1271	6.55064	7.34318	122.111	1.87449	0.324763	0.830733
EIF4G1	EIF4G1	1981	EIF-4G1|EIF4F|EIF4G|EIF4GI|P220|PARK18	eukaryotic translation initiation factor 4 gamma_ 1	6.40224	6.481	6.52644	6.63952	6.12721	6.71324	6.55064	7.04393	94.3878	1.61587	0.358753	0.830733
ELOVL5	ELOVL5	60481	HELO1|SCA38|dJ483K16.1	ELOVL fatty acid elongase 5	6.81728	6.92157	6.7836	7.42587	7.19061	8.24231	6.89856	6.98525	142.828	1.9904	0.307527	0.830733
EME1	EME1	146956	MMS4L|SLX2A	essential meiotic structure-specific endonuclease 1	5.81728	5.37408	5.92378	5.59258	5.38784	4.05106	5.0912	4.75415	38.0282	-0.46327	0.806265	0.955711
ENTPD1	ENTPD1	953	ATPDase|CD39|NTPDase-1|SPG64	ectonucleoside triphosphate diphosphohydrolase 1	6.81728	5.84357	5.92378	5.58493	4.4959	5.45677	6.26113	4.77839	50.0473	0.826549	0.577351	0.866026
ENTPD2	ENTPD2	954	CD39L1|NTPDase-2	ectonucleoside triphosphate diphosphohydrolase 2	4.81728	1.67364	1.16889	3.09643	3.12481	2.69908	3.0912	1.19343	6.09698	0.628031	0.506173	0.861393
EOMES	EOMES	8320	TBR2	eomesodermin	6.81728	4.481	4.16889	4.18009	2.48095	1.35804	5.67617	3.33094	16.6988	-0.186413	0.808426	0.955711
EP300	EP300	2033	KAT3B|RSTS2|p300	E1A binding protein p300	5.81728	6.92157	6.66074	6.87583	6.95668	7.08232	7.26113	7.09309	114.055	1.9676	0.285245	0.830733
EPAS1	EPAS1	2034	ECYT4|HIF2A|HLF|MOP2|PASD2|bHLHe73	endothelial PAS domain protein 1	4.81728	4.84357	7.29817	7.15446	5.52534	7.29664	5.67617	5.72949	65.9198	-0.177085	0.881344	0.984565
EPC1	EPC1	80314	Epl1	enhancer of polycomb homolog 1 (Drosophila)	4.81728	4.67364	6.21328	6.1178	5.2134	6.20604	5.89856	4.9159	45.4746	0.160992	0.864368	0.979699
EPCAM	EPCAM	4072	DIAR5|EGP-2|EGP314|EGP40|ESA|HNPCC8|KS1/4|KSA|M4S1|MIC18|MK-1|TACSTD1|TROP1	epithelial cell adhesion molecule	6.40224	7.455	8.47267	8.60588	8.1218	9.03141	8.30066	8.45647	275.473	2.33883	0.299693	0.830733
ERBB2	ERBB2	2064	CD340|HER-2|HER-2/neu|HER2|MLN 19|NEU|NGL|TKR1	erb-b2 receptor tyrosine kinase 2	4.81728	6.58053	6.62832	7.22756	7.24028	9.0436	6.0912	6.50086	108.851	1.32283	0.270946	0.830733
ERBB3	ERBB3	2065	ErbB-3|HER3|LCCS2|MDA-BF-1|c-erbB-3|c-erbB3|erbB3-S|p180-ErbB3|p45-sErbB3|p85-sErbB3	erb-b2 receptor tyrosine kinase 3	6.81728	7.65092	7.23498	7.53118	8.88147	9.36591	7.61477	7.9349	235.393	2.82204	0.189831	0.830733
ERN1	ERN1	2081	IRE1|IRE1P|IRE1a|hIRE1p	endoplasmic reticulum to nucleus signaling 1	5.81728	4.25861	5.81275	5.35227	4.41955	5.51184	6.26113	5.26382	40.4244	0.657894	0.465897	0.842916
ERO1A	ERO1A	30001	ERO1-L|ERO1-L-alpha|ERO1-alpha|ERO1L|ERO1LA|Ero1alpha	endoplasmic reticulum oxidoreductase alpha	4.81728	6.13308	8.50874	6.42266	6.36969	7.41549	7.33913	7.04143	108.079	0.0374747	0.972165	0.989915
ESR1	ESR1	2099	ER|ESR|ESRA|ESTRR|Era|NR3A1	estrogen receptor 1	7.13921	4.481	2.75385	3.27827	0.802879	3.35804	6.0912	2.39507	13.8081	1.27563	0.248543	0.830733
ESR2	ESR2	2100	ER-BETA|ESR-BETA|ESRB|ESTRB|Erb|NR3A2	estrogen receptor 2 (ER beta)	7.40224	2.67364	3.75385	1.27827	0.0659132	1.35804	4.67617	0.678859	6.66162	-2.1375	0.109324	0.830733
ESRP1	ESRP1	54845	RBM35A|RMB35A	epithelial splicing regulatory protein 1	4.81728	5.92157	6.59516	7.62373	6.15573	7.50643	6.67617	7.16383	94.189	0.476028	0.638269	0.88632
ESRP2	ESRP2	80004	RBM35B	epithelial splicing regulatory protein 2	4.81728	3.99557	5.49082	6.25675	4.82673	6.77758	4.67617	4.84878	37.0451	0.567685	0.682997	0.901494
EXO1	EXO1	9156	HEX1|hExoI	exonuclease 1	7.62463	5.92157	5.49082	4.90071	4.86753	3.28404	6.79164	5.74187	47.764	0.0726037	0.891461	0.986676
EZH2	EZH2	2146	ENX-1|ENX1|EZH1|EZH2b|KMT6|KMT6A|WVS|WVS2	enhancer of zeste 2 polycomb repressive complex 2 subunit	5.81728	6.58053	5.86933	6.45241	7.24361	5.76856	5.0912	5.86586	67.9357	0.128807	0.955749	0.987607
FAM30A	FAM30A	9834	C14orf110|FAM30A|HSPC053|KIAA0125	KIAA0125	6.40224	2.67364	5.62832	4.64505	0.895988	2.2585	3.0912	2.26382	11.1761	-2.67807	0.0591739	0.830733
FAM83A	FAM83A	84985	BJ-TSA-9	family with sequence similarity 83_ member A	7.62463	4.84357	4.75385	4.14928	0.596428	5.02858	6.41313	1.45647	20.5098	-0.181607	0.859788	0.978446
FANCA	FANCA	2175	FA|FA-H|FA1|FAA|FACA|FAH|FANCH	Fanconi anemia_ complementation group A	8.13921	5.37408	6.16889	5.79521	5.71617	3.69908	6.67617	6.8344	66.2754	-0.167945	0.796369	0.953623
FANCD2	FANCD2	2177	FA-D2|FA4|FACD|FAD|FAD2|FANCD	Fanconi anemia_ complementation group D2	8.81728	6.19721	6.86933	6.14148	6.08828	5.21933	7.0912	6.08582	94.5983	-0.98388	0.114808	0.830733
FANCI	FANCI	55215	KIAA1794	Fanconi anemia_ complementation group I	5.81728	5.84357	6.25635	6.27589	6.10056	5.38779	5.67617	6.18439	61.51	0.899364	0.593382	0.873549
FAS	FAS	355	ALPS1A|APO-1|APT1|CD95|FAS1|FASTM|TNFRSF6	Fas cell surface death receptor	6.81728	4.25861	3.75385	3.58493	2.5107	2.62107	5.0912	2.19343	14.4589	-0.247928	0.768809	0.942329
FASLG	FASLG	356	ALPS1B|APT1LG1|APTL|CD178|CD95-L|CD95L|FASL|TNFSF6	Fas ligand (TNF superfamily_ member 6)	5.81728	3.67364	2.75385	4.48155	1.85018	-0.548852	3.0912	2.33094	7.62758	-1.47393	0.253991	0.830733
FBLIM1	FBLIM1	54751	CAL|FBLP-1|FBLP1	filamin binding LIM protein 1	6.40224	2.67364	4.86933	3.35227	4.72254	4.68955	5.41313	3.45647	21.8172	1.16439	0.237481	0.830733
FBLN2	FBLN2	2199	-	fibulin 2	7.62463	7.42853	8.02687	6.71334	7.11758	7.30133	7.33913	5.78439	143.706	-0.232338	0.654484	0.892083
FBN1	FBN1	2200	ACMICD|ECTOL1|FBN|GPHYSD2|MASS|MFS1|OCTD|SGS|SSKS|WMS|WMS2	fibrillin 1	4.81728	6.67364	6.92378	5.84412	6.19748	7.0732	6.67617	7.42993	87.6967	1.90371	0.289071	0.830733
FCAR	FCAR	2204	CD89|CTB-61M7.2|FcalphaRI	Fc fragment of IgA receptor	6.81728	2.67364	4.33882	1.48977	-2.10401	-0.226924	3.0912	-2.1285	3.34942	-1.58496	0.15429	0.830733
FCGR3A/B	FCGR3A/B	NA	NA	NA	4.81728	7.58053	8.08775	7.81498	6.28831	11.1222	7.55064	6.76935	181.507	1.95132	0.190196	0.830733
FCRL2	FCRL2	79368	CD307b|FCRH2|IFGP4|IRTA4|SPAP1|SPAP1A|SPAP1B|SPAP1C	Fc receptor-like 2	4.81728	3.99557	3.97625	4.01903	-0.519049	2.095	4.0912	1.77839	8.17778	-1.35364	0.191833	0.830733
FEN1	FEN1	2237	FEN-1|MF1|RAD2	flap structure-specific endonuclease 1	5.81728	4.84357	4.97625	5.28773	5.97013	4.52796	4.67617	5.14763	35.6502	0.70941	0.51832	0.861393
FGF7	FGF7	2252	HBGF-7|KGF	fibroblast growth factor 7	5.81728	4.481	5.69245	5.44819	4.18139	4.45115	5.67617	3.84878	30.9004	-0.479168	0.569989	0.861393
FGFBP1	FGFBP1	9982	FGF-BP|FGF-BP1|FGFBP|FGFBP-1|HBP17	fibroblast growth factor binding protein 1	5.81728	3.25861	3.49082	1.03034	0.703343	-0.226924	4.0912	1.67886	5.58068	0.25742	0.511645	0.861393
FGFR1	FGFR1	2260	BFGFR|CD331|CEK|FGFBR|FGFR-1|FLG|FLT-2|FLT2|HBGFR|HH2|HRTFDS|KAL2|N-SAM|OGD|bFGF-R-1	fibroblast growth factor receptor 1	6.40224	5.99557	5.69245	4.92516	6.89458	6.31223	6.67617	4.04143	58.3831	1.20008	0.204325	0.830733
FGFR2	FGFR2	2263	BBDS|BEK|BFR-1|CD332|CEK3|CFD1|ECT1|JWS|K-SAM|KGFR|TK14|TK25	fibroblast growth factor receptor 2	7.9872	6.25861	5.41682	5.61906	6.83704	5.00574	7.33913	6.68849	84.0986	0.606394	0.235316	0.830733
FGFR3	FGFR3	2261	ACH|CD333|CEK2|HSFGFR3EX|JTK4	fibroblast growth factor receptor 3	4.81728	4.481	7.41682	5.27351	3.59643	5.06586	4.0912	1.45647	23.0201	-2.10154	0.165178	0.830733
FLT1	FLT1	2321	FLT|FLT-1|VEGFR-1|VEGFR1	fms-related tyrosine kinase 1	4.81728	5.481	6.12309	4.90686	5.09566	6.12357	6.67617	4.45647	44.0177	0.647698	0.440074	0.839259
FLT3	FLT3	2322	CD135|FLK-2|FLK2|STK1	fms-related tyrosine kinase 3	4.81728	3.99557	2.16889	2.03034	1.14392	1.97471	3.0912	1.77839	6.16901	0.334472	0.598877	0.873549
FLT4	FLT4	2324	FLT41|LMPH1A|PCL|VEGFR3	fms-related tyrosine kinase 4	5.81728	1.67364	2.75385	2.38789	2.02527	2.095	4.67617	2.67886	8.07519	0.906891	0.217234	0.830733
FMOD	FMOD	2331	FM|SLRR2E	fibromodulin	6.40224	7.22823	5.86933	5.80183	5.50701	6.66304	5.89856	6.16152	73.0834	2.28e-15	1	1
FOLH1	FOLH1	2346	FGCP|FOLH|GCP2|GCPII|NAALAD1|NAALAdase|PSM|PSMA|mGCP	folate hydrolase (prostate-specific membrane antigen) 1	4.81728	5.13308	3.49082	2.58493	6.42542	2.45115	5.41313	3.59942	18.8881	1.88349	0.164624	0.830733
FOS	FOS	2353	AP-1|C-FOS|p55	FBJ murine osteosarcoma viral oncogene homolog	4.81728	4.67364	5.07578	7.18389	3.96208	4.34597	5.89856	4.63969	33.6985	-1.16993	0.293298	0.830733
FOXA1	FOXA1	3169	HNF3A|TCF3A	forkhead box A1	7.13921	3.67364	3.16889	5.7063	-0.782084	7.18924	5.67617	0.871504	16.9165	1.3662	0.558545	0.861393
FOXM1	FOXM1	2305	FKHL16|FOXM1B|HFH-11|HFH11|HNF-3|INS-1|MPHOSPH2|MPP-2|MPP2|PIG29|TGT3|TRIDENT	forkhead box M1	8.62463	7.06596	7.57828	6.69034	5.86177	5.91058	7.94919	8.0638	148.886	-0.118836	0.831099	0.966159
FOXP1	FOXP1	27086	12CC4|HSPC215|MFH|QRF1|hFKH1B	forkhead box P1	8.51772	6.58053	6.84132	6.34095	5.72888	7.73424	7.55064	6.39898	124.643	0.0530029	0.91454	0.986676
FOXP3	FOXP3	50943	AIID|DIETER|IPEX|JM2|PIDX|XPID	forkhead box P3	7.62463	5.13308	5.16889	4.13887	2.5107	3.35804	6.0912	3.57194	25.9861	-0.947533	0.121256	0.830733
FPR1	FPR1	2357	FMLP|FPR	formyl peptide receptor 1	7.40224	4.25861	4.86933	4.8117	2.5107	4.23251	5.89856	1.33094	21.3228	-0.563901	0.448432	0.839259
FRMD6	FRMD6	122786	C14orf31|EX1|Willin|c14_5320	FERM domain containing 6	4.81728	4.84357	6.84132	5.40538	4.94038	5.97862	5.41313	5.18439	43.052	-0.275634	0.802347	0.955426
FSTL1	FSTL1	11167	FRP|FSL1|MIR198	follistatin-like 1	7.40224	8.01349	10.2269	8.43814	9.44722	9.0229	8.64579	8.0085	401.887	0.0341717	0.970414	0.989915
FZD1	FZD1	8321	-	frizzled class receptor 1	6.40224	6.13308	6.95025	6.09374	6.31384	7.77533	7.26113	6.27238	100.444	1.04789	0.27208	0.830733
FZD4	FZD4	8322	CD344|EVR1|FEVR|FZD4S|Fz-4|Fz4|FzE4|GPCR|hFz4	frizzled class receptor 4	4.81728	4.25861	3.16889	5.18516	4.19977	5.62607	5.0912	5.18439	25.838	1.27417	0.33699	0.830733
FZD7	FZD7	8324	FzE3	frizzled class receptor 7	4.81728	6.06596	8.13467	4.91298	6.84727	5.75036	6.55064	7.42801	79.5283	0.162184	0.884906	0.985583
FZD8	FZD8	8325	FZ-8|hFZ8	frizzled class receptor 8	6.81728	4.25861	5.33882	4.24951	4.9728	3.55967	6.41313	5.07118	33.9449	1.20282	0.167469	0.830733
GABARAP	GABARAP	11337	ATG8A|GABARAP-a|MM46	GABA(A) receptor-associated protein	4.81728	7.67364	8.87625	8.81047	8.26613	8.63354	7.48352	7.86303	223.322	1.66804	0.466589	0.842916
GABPA	GABPA	2551	E4TF1-60|E4TF1A|NFT2|NRF2|NRF2A|RCH04A07	GA binding protein transcription factor_ alpha subunit 60kDa	4.81728	5.37408	5.62832	5.43548	6.02011	5.26493	5.41313	5.07118	41.5871	0.742656	0.649506	0.889931
GALNT3	GALNT3	2591	GalNAc-T3|HFTC|HHS	polypeptide N-acetylgalactosaminyltransferase 3	4.81728	3.67364	7.21328	5.26396	5.99665	5.90236	6.79164	7.05886	57.2701	0.893715	0.480024	0.847523
GLUD1	GLUD1	2894	GluD1|GRID1	glutamate receptor_ ionotropic_ delta 1	6.40224	6.53162	7.45429	8.12111	7.45918	8.0191	8.17867	7.65614	178.255	2.33322	0.255599	0.830733
GLUD2	GLUD2	2747	GDH2|GLUDP1	glutamate dehydrogenase 2	4.81728	5.67364	6.49082	6.68319	6.45249	6.91875	6.26113	6.34318	73.775	1.69536	0.325808	0.830733
GLUL	GLUL	2752	GLNS|GS|PIG43|PIG59	glutamate-ammonia ligase	6.81728	8.68487	9.3338	9.43708	9.04827	9.42125	8.64579	8.67805	433.023	2.0666	0.40301	0.833614
GMPS	GMPS	8833	-	guanine monophosphate synthase	7.81728	6.481	6.21328	6.11515	6.01233	5.51724	7.61477	6.15228	89.9104	0.271596	0.467909	0.842916
GNAI3	GNAI3	2773	87U6|ARCND1	guanine nucleotide binding protein (G protein)_ alpha inhibiting activity polypeptide 3	4.81728	6.37408	5.92378	6.81334	6.73677	7.33837	7.41313	7.52076	98.1685	2.52711	0.159125	0.830733
GNLY	GNLY	10578	D2S69E|LAG-2|LAG2|NKG5|TLA519	granulysin	6.40224	5.13308	4.62832	5.65239	2.87327	2.45115	6.41313	4.8257	27.8077	0.0335526	0.973306	0.989915
GPNMB	GPNMB	10457	HGFIN|NMB	glycoprotein (transmembrane) nmb	6.40224	8.18144	8.6201	8.70674	7.23806	8.56163	8.0912	7.95897	250.74	1.558	0.493431	0.85574
GPT	GPT	2875	AAT1|ALT1|GPT1	glutamic-pyruvate transaminase (alanine aminotransferase)	5.81728	2.67364	5.41682	1.6742	2.82673	1.2585	5.41313	3.29777	11.6905	-0.710493	0.531395	0.861393
GPX1	GPX1	2876	GPXD|GSHPX1	glutathione peroxidase 1	4.81728	8.75046	9.25104	9.15155	7.95195	8.90442	8.70591	8.47606	304.666	1.70452	0.480719	0.847523
GRAP2	GRAP2	9402	GADS|GRAP-2|GRB2L|GRBLG|GRID|GRPL|GrbX|Grf40|Mona|P38	GRB2-related adaptor protein 2	7.40224	4.25861	3.97625	3.43973	1.48095	1.03611	5.67617	2.77839	13.5109	-0.685891	0.35798	0.830733
GRB7	GRB7	2886	-	growth factor receptor-bound protein 7	5.81728	3.67364	4.49082	5.41836	5.15808	6.46517	4.67617	4.10032	31.4498	1.38466	0.32187	0.830733
GREM1	GREM1	26585	C15DUPq|CKTSF1B1|CRAC1|CRCS4|DAND2|DRM|DUP15q|GREMLIN|HMPS|HMPS1|IHG-2|MPSH|PIG2	gremlin 1_ DAN family BMP antagonist	9.06521	5.58053	6.89681	4.23001	4.31384	6.16195	7.55064	5.08096	69.0703	-0.992051	0.327017	0.830733
GRHL2	GRHL2	79977	BOM|DFNA28|ECTDS|TFCP2L3	grainyhead-like transcription factor 2	8.13921	6.42853	7.25635	7.76081	6.48845	8.37967	7.41313	7.49904	171.332	0.392932	0.406919	0.833614
GSK3B	GSK3B	2932	-	glycogen synthase kinase 3 beta	8.40224	6.19721	6.86933	6.56367	6.23138	7.58043	7.73506	5.79037	121.197	0.156535	0.750664	0.9381
GSR	GSR	2936	HEL-75	glutathione reductase	4.81728	6.67364	6.12309	6.4503	5.38383	7.76969	5.41313	7.43756	76.5625	0.977222	0.648913	0.889931
GSTM4	GSTM4	2948	GSTM4-4|GTM4	glutathione S-transferase mu 4	6.40224	4.84357	4.86933	4.08562	4.36359	4.46237	5.0912	4.94832	29.5131	0.415547	0.794384	0.953623
GTSE1	GTSE1	51512	B99	G-2 and S-phase expressed 1	5.81728	5.84357	5.49082	5.35227	6.52534	3.91058	6.41313	8.31548	62.1878	2.01228	0.0939821	0.830733
GZMA	GZMA	3001	CTLA3|HFSP	granzyme A (granzyme 1_ cytotoxic T-lymphocyte-associated serine esterase 3)	5.81728	4.25861	4.62832	5.69923	2.72888	1.84346	5.67617	2.8715	18.2577	-1.29177	0.224706	0.830733
GZMB	GZMB	3002	CCPI|CGL-1|CGL1|CSP-B|CSPB|CTLA1|CTSGL1|HLP|SECT	granzyme B (granzyme 2_ cytotoxic T-lymphocyte-associated serine esterase 1)	5.81728	2.67364	2.16889	3.8377	0.895988	-0.96389	5.41313	1.77839	6.50993	-0.917538	0.414888	0.833614
GZMH	GZMH	2999	CCP-X|CGL-2|CSP-C|CTLA1|CTSGL2	granzyme H (cathepsin G-like 2_ protein h-CCPX)	4.81728	3.25861	3.75385	4.08562	1.06591	1.45115	5.0912	1.67886	8.87847	-1.32193	0.266416	0.830733
GZMK	GZMK	3003	TRYP2	granzyme K (granzyme 3; tryptase II)	4.81728	5.37408	5.41682	6.5081	3.88467	3.64097	5.67617	4.69168	32.0271	-1.2384	0.196178	0.830733
H2AX	H2AX	3014	H2A.X|H2A/X|H2AX|H2AFX	H2A histone family_ member X	4.81728	1.67364	3.97625	2.73078	2.65088	2.2585	4.67617	2.67886	9.08064	0.5025	0.446034	0.839259
HAVCR2	HAVCR2	84868	CD366|HAVcr-2|KIM-3|TIM3|TIMD-3|TIMD3|Tim-3	hepatitis A virus cellular receptor 2	6.81728	4.99557	5.41682	5.73078	4.19061	5.17225	5.89856	4.42609	40.2522	-0.101538	0.895722	0.986676
HCK	HCK	3055	JTK9|p59Hck|p61Hck	HCK proto-oncogene_ Src family tyrosine kinase	6.81728	6.62784	6.12309	6.18263	3.89599	4.43983	5.0912	4.92679	45.667	-1.31495	0.515422	0.861393
HDAC1	HDAC1	3065	GON-10|HD1|RPD3|RPD3L1	histone deacetylase 1	6.40224	5.67364	6.45429	6.73078	5.99139	6.18247	5.0912	6.5545	70.2811	0.131171	0.954377	0.987561
HDC	HDC	3067	-	histidine decarboxylase	7.13921	1.67364	2.75385	0.200266	0.596428	1.35804	4.67617	-2.1285	4.09436	0.327282	0.262842	0.830733
HGF	HGF	3082	DFNB39|F-TCF|HGFB|HPTA|SF	hepatocyte growth factor (hepapoietin A; scatter factor)	5.81728	2.67364	3.49082	3.58493	2.72888	4.40534	4.0912	1.8715	11.9833	1.04731	0.3773	0.830733
HIF1A	HIF1A	3091	HIF-1-alpha|HIF-1A|HIF-1alpha|HIF1|HIF1-ALPHA|MOP1|PASD8|bHLHe78	hypoxia inducible factor 1_ alpha subunit (basic helix-loop-helix transcription factor)	4.81728	7.06596	8.12309	7.86797	6.61709	7.6606	6.79164	7.80814	136.615	1.35516	0.515116	0.861393
HJURP	HJURP	55355	FAKTS|URLC9|hFLEG1	Holliday junction recognition protein	6.81728	5.481	5.33882	5.20527	6.1224	4.30913	6.26113	6.52614	54.1033	1.18322	0.172656	0.830733
HK2	HK2	3099	HKII|HXK2	hexokinase 2	4.81728	3.99557	4.16889	4.1178	3.61023	5.13765	5.67617	4.54393	22.7602	1.6746	0.0574945	0.830733
HLA-A	HLA-A	3105	HLAA	major histocompatibility complex_ class I_ A	8.51772	9.7664	10.1231	9.61413	9.57327	8.28799	9.66106	9.01425	639.029	-0.325835	0.51376	0.861393
HLA-B	HLA-B	3106	AS|HLAB|SPDA1	major histocompatibility complex_ class I_ B	9.2096	12.3012	12.1289	12.1261	11.179	10.4811	11.9492	11.2229	2564.99	-0.519544	0.436612	0.839259
HLA-C	HLA-C	3107	D6S204|HLA-JY3|HLC-C|PSORS1	major histocompatibility complex_ class I_ C	8.27671	9.455	10.126	9.04052	8.57591	8.7044	9.48352	8.51085	519.728	-0.42947	0.417314	0.833614
HLA-DQA1	HLA-DQA1	3117	CD|CELIAC1|DQ-A1|GSE|HLA-DQA	major histocompatibility complex_ class II_ DQ alpha 1	4.81728	9.80293	8.20231	8.67555	7.3441	-1.54885	8.26113	8.32786	106.543	-0.715396	0.819299	0.961449
HLA-DRB1	HLA-DRB1	3123	DRB1|DRw10|HLA-DR1B|HLA-DRB|SS1	major histocompatibility complex_ class II_ DR beta 1	7.40224	9.80293	8.64462	9.88501	8.36461	6.89202	10.3391	9.36185	457.159	0.0823543	0.935074	0.986676
HLA-E	HLA-E	3133	EA1.2|EA2.1|HLA-6.2|MHC|QA1	major histocompatibility complex_ class I_ E	4.81728	8.8132	9.32876	9.5517	8.11395	8.41043	8.55064	8.35834	302.971	1.41286	0.562978	0.861393
HMGA1	HMGA1	3159	HMG-R|HMGA1A|HMGIY	high mobility group AT-hook 1	4.81728	8.85355	7.16889	7.89065	6.92389	6.7296	7.89856	7.30613	146.888	1.21259	0.570522	0.861393
HMOX1	HMOX1	3162	HMOX1D|HO-1|HSP32|bK286B10	heme oxygenase 1	5.81728	4.99557	6.02687	6.05271	5.03554	5.57527	5.41313	4.50086	43.0265	-0.394279	0.696486	0.909097
HRAS	HRAS	3265	C-BAS/HAS|C-H-RAS|C-HA-RAS1|CTLO|H-RASIDX|HAMSV|HRAS1|RASH1|p21ras	Harvey rat sarcoma viral oncogene homolog	7.81728	6.13308	6.07578	5.91908	6.29687	7.06402	7.48352	5.17529	90.2349	0.663275	0.127735	0.830733
HSD11B1	HSD11B1	3290	11-DH|11-beta-HSD1|CORTRD2|HDL|HSD11|HSD11B|HSD11L|SDR26C1	hydroxysteroid (11-beta) dehydrogenase 1	4.81728	1.67364	3.75385	3.87583	0.983451	1.84346	4.67617	1.33094	7.30725	-1.08746	0.329236	0.830733
HSPB1	HSPB1	3315	CMT2F|HEL-S-102|HMN2B|HS.76067|HSP27|HSP28|Hsp25|SRP27	heat shock 27kDa protein 1	6.40224	8.46806	9.37346	10.5473	8.37172	11.1825	9.43105	9.26436	560.309	0.656235	0.612356	0.876379
HUWE1	HUWE1	10075	ARF-BP1|HECTH9|HSPC272|Ib772|LASU1|MULE|URE-B1|UREB1	HECT_ UBA and WWE domain containing 1_ E3 ubiquitin protein ligase	4.81728	6.80293	6.81275	6.26156	6.18831	7.04173	6.55064	6.558	83.2368	1.51161	0.394921	0.833614
ICAM1	ICAM1	3383	BB2|CD54|P3.58	intercellular adhesion molecule 1	5.81728	6.67364	6.21328	6.072	4.61023	5.95894	6.0912	5.13829	56.5659	0.51727	0.753172	0.9381
ICOS	ICOS	29851	AILIM|CD278|CVID1	inducible T-cell co-stimulator	5.81728	5.481	3.97625	3.6002	1.75397	0.258502	6.0912	1.45647	11.7481	-0.415037	0.737004	0.930669
IDH1	IDH1	3417	HEL-216|HEL-S-26|IDCD|IDH|IDP|IDPC|PICD	isocitrate dehydrogenase 1 (NADP+)_ soluble	4.81728	5.67364	6.72348	6.87583	5.86753	7.89616	5.89856	6.86586	80.2981	0.798221	0.467004	0.842916
IDH2	IDH2	3418	D2HGA2|ICD-M|IDH|IDHM|IDP|IDPM|mNADP-IDH	isocitrate dehydrogenase 2 (NADP+)_ mitochondrial	4.81728	8.11659	9.16324	8.56804	7.3441	8.63912	8.17867	8.42321	239.899	1.658	0.474877	0.846881
IDO1	IDO1	3620	IDO|IDO-1|INDO	indoleamine 2_3-dioxygenase 1	4.81728	6.62784	6.7836	5.83124	4.45823	1.62107	5.89856	4.72949	34.1997	-0.970976	0.601131	0.873549
IFNAR1	IFNAR1	3454	AVP|IFN-alpha-REC|IFNAR|IFNBR|IFRC	interferon (alpha_ beta and omega) receptor 1	5.81728	5.37408	7.41682	6.28537	6.68062	6.84561	6.41313	5.95897	81.5145	0.293446	0.765958	0.942317
IFNAR2	IFNAR2	3455	IFN-R|IFN-alpha-REC|IFNABR|IFNARB	interferon (alpha_ beta and omega) receptor 2	8.81728	7.40156	8.55259	7.2483	7.58599	6.92079	7.73506	7.14763	204.527	-0.624925	0.0882641	0.830733
IFNG	IFNG	3458	IFG|IFI	interferon_ gamma	4.81728	3.67364	1.16889	2.48977	0.217916	-0.226924	3.0912	0.456467	3.8934	-0.593659	0.355918	0.830733
IFNGR2	IFNGR2	3460	AF-1|IFGR2|IFNGT1|IMD28	interferon gamma receptor 2 (interferon gamma transducer 1)	6.40224	7.97742	7.84132	7.39666	7.87756	7.46098	6.67617	7.50632	168.002	1.4453	0.490388	0.854447
IGF1R	IGF1R	3480	CD221|IGFIR|IGFR|JTK13	insulin-like growth factor 1 receptor	6.81728	7.1655	7.43568	4.90686	6.26012	5.3029	6.79164	7.1453	89.1498	0.0266351	0.979223	0.989915
IGFBP3	IGFBP3	3486	BP-53|IBP3	insulin-like growth factor binding protein 3	4.81728	4.99557	7.95025	6.29244	6.22017	7.08414	7.0912	5.83151	77.9956	0.128786	0.905954	0.986676
IKBKG	IKBKG	8517	AMCBX1|FIP-3|FIP3|Fip3p|IKK-gamma|IMD33|IP|IP1|IP2|IPD2|NEMO|ZC2HC9	inhibitor of kappa light polypeptide gene enhancer in B-cells_ kinase gamma	6.81728	5.92157	5.56121	5.99324	5.27537	5.99804	6.41313	5.39507	60.6259	1.37836	0.365529	0.830733
IL10	IL10	3586	CSIF|GVHDS|IL-10|IL10A|TGIF	interleukin 10	8.40224	5.13308	4.97625	2.15962	-0.104012	1.97471	6.0912	0.871504	12.8891	-2.68182	0.0829894	0.830733
IL10RA	IL10RA	3587	CD210|CD210a|CDW210A|HIL-10R|IL-10R1|IL10R	interleukin 10 receptor_ alpha	6.40224	5.76111	6.07578	6.85848	4.54704	5.15159	5.89856	5.05141	52.6469	-0.920566	0.319876	0.830733
IL11	IL11	3589	AGIF|IL-11	interleukin 11	4.81728	3.99557	4.62832	0.837696	2.35542	2.49554	5.0912	1.57194	9.34453	-0.387023	0.690619	0.904614
IL12B	IL12B	3593	CLMF|CLMF2|IL-12B|IMD28|IMD29|NKSF|NKSF2	interleukin 12B	8.40224	5.76111	5.25635	0.615303	0.35542	0.258502	6.9981	2.11943	13.1848	-2.33388	0.325727	0.830733
IL12RB1	IL12RB1	3594	CD212|IL-12R-BETA1|IL12RB|IMD30	interleukin 12 receptor_ beta 1	5.81728	4.67364	4.33882	3.91298	1.70334	1.45115	5.41313	2.04143	12.7195	-1.46949	0.064163	0.830733
IL15	IL15	3600	IL-15	interleukin 15	7.9872	5.76111	4.86933	3.8377	1.70334	2.6606	6.26113	2.62639	22.0598	-1.70671	0.100958	0.830733
IL15RA	IL15RA	3601	CD215	interleukin 15 receptor_ alpha	6.40224	4.99557	3.49082	4.53814	3.00451	3.47352	6.26113	4.26382	23.4858	0.821663	0.410269	0.833614
IL21R	IL21R	50615	CD360|NILR	interleukin 21 receptor	8.40224	5.37408	5.07578	3.00762	1.59643	1.97471	7.17867	2.57194	21.0783	-1.04182	0.444893	0.839259
IL27RA	IL27RA	9466	CRL1|IL-27RA|IL27R|TCCR|WSX1|zcytor1	interleukin 27 receptor_ alpha	9.27671	6.67364	6.41682	4.60777	4.64418	3.73655	7.17867	5.83151	66.0612	-1.7021	0.107819	0.830733
IL2RA	IL2RA	3559	CD25|IDDM10|IL2R|TCGFR|p55	interleukin 2 receptor_ alpha	4.81728	3.99557	3.97625	3.98454	2.14392	1.69908	5.0912	2.72949	11.7506	-0.652077	0.466163	0.842916
IL2RB	IL2RB	3560	CD122|IL15RB|P70-75	interleukin 2 receptor_ beta	5.81728	6.19721	4.75385	6.60588	3.92941	3.67997	5.41313	5.14763	36.5816	-1.38187	0.223178	0.830733
IL2RG	IL2RG	3561	CD132|CIDX|IL-2RG|IMD4|P64|SCIDX|SCIDX1	interleukin 2 receptor_ gamma	7.40224	7.42853	6.45429	6.78856	4.33062	4.34597	5.41313	5.44136	61.8451	-2.0569	0.0286644	0.830733
IL3RA	IL3RA	3563	CD123|IL3R|IL3RAY|IL3RX|IL3RY|hIL-3Ra	interleukin 3 receptor_ alpha (low affinity)	5.81728	3.99557	3.75385	3.20027	1.70334	2.62107	4.0912	2.39507	10.9072	0.206451	0.803447	0.955426
IL4R	IL4R	3566	CD124|IL-4RA|IL4RA	interleukin 4 receptor	5.81728	3.99557	4.62832	5.01903	3.62391	5.6459	4.67617	3.95897	25.4685	0.70044	0.560249	0.861393
IL6	IL6	3569	BSF2|HGF|HSF|IFNB2|IL-6	interleukin 6	8.90474	5.481	5.07578	2.75826	1.28831	2.15159	7.26113	0.871504	18.688	-2.54569	0.227565	0.830733
IL6ST	IL6ST	3572	CD130|CDW130|GP130|IL-6RB	interleukin 6 signal transducer	4.81728	7.481	7.75385	7.87426	7.01752	8.59772	7.89856	8.15691	174.809	2.12584	0.315594	0.830733
IL7	IL7	3574	IL-7	interleukin 7	8.13921	5.481	5.25635	2.20027	1.41955	1.84346	6.89856	1.57194	17.1638	-1.118	0.426056	0.833614
IL7R	IL7R	3575	CD127|CDW127|IL-7R-alpha|IL7RA|ILRA	interleukin 7 receptor	6.81728	5.76111	6.02687	5.41404	3.71617	4.53861	6.26113	4.21135	40.5975	0.287869	0.845462	0.975231
IL9R	IL9R	3581	CD129|IL-9R	interleukin 9 receptor	6.40224	2.67364	2.75385	0.0303407	0.0659132	1.53861	4.0912	1.45647	5.19288	0.605459	0.136643	0.830733
INHBA	INHBA	3624	EDF|FRP	inhibin_ beta A	5.81728	5.92157	6.49082	3.40538	4.91836	5.49007	7.0912	4.86019	45.2347	0.563589	0.566982	0.861393
IQGAP1	IQGAP1	8826	HUMORFA01|SAR1|p195	IQ motif containing GTPase activating protein 1	8.40224	7.94043	8.6365	8.09845	7.26231	8.53927	8.17867	8.44326	291.558	0.0576631	0.857226	0.978446
IRF1	IRF1	3659	IRF-1|MAR	interferon regulatory factor 1	8.51772	6.25861	7.05153	6.701	5.36359	6.15505	6.67617	5.4184	91.6307	-1.20623	0.0165444	0.830733
IRF3	IRF3	3661	-	interferon regulatory factor 3	8.40224	6.19721	6.97625	6.64873	6.09811	6.37299	7.0912	6.5615	110.932	-0.427638	0.217616	0.830733
IRF4	IRF4	3662	LSIRF|MUM1|NF-EM5|SHEP8	interferon regulatory factor 4	4.81728	5.481	7.27742	6.6796	3.38784	3.77308	5.0912	3.77839	32.8023	-1.99851	0.325852	0.830733
IRF7	IRF7	3665	IMD39|IRF-7H|IRF7A|IRF7B|IRF7C|IRF7H	interferon regulatory factor 7	4.81728	7.71804	7.09963	7.53516	6.78016	6.30913	6.55064	6.44515	100.908	0.796621	0.683391	0.901494
ITGA1	ITGA1	3672	CD49a|VLA1	integrin_ alpha 1	8.13921	5.481	5.86933	4.90686	5.26231	5.57527	6.89856	4.62639	57.4751	-0.318888	0.580454	0.86893
ITGA11	ITGA11	22801	HsT18964	integrin_ alpha 11	7.9872	6.37408	7.23498	3.78523	5.28401	5.38779	7.55064	5.33911	69.4489	-0.263928	0.714304	0.922643
ITGA5	ITGA5	3678	CD49e|FNRA|VLA-5|VLA5A	integrin_ alpha 5 (fibronectin receptor_ alpha polypeptide)	7.40224	6.62784	6.84132	5.3018	5.70977	7.08232	5.89856	5.58575	79.1326	0.0577155	0.931392	0.986676
ITGA8	ITGA8	8516	-	integrin_ alpha 8	6.81728	2.67364	4.62832	2.64505	1.70334	3.20604	4.0912	0.871504	10.053	-0.584963	0.571668	0.861393
ITGAL	ITGAL	3683	CD11A|LFA-1|LFA1A	integrin_ alpha L (antigen CD11A (p180)_ lymphocyte function-associated antigen 1; alpha polypeptide)	6.40224	5.25861	5.33882	6.50202	3.75397	3.33379	6.26113	4.47142	35.8835	-0.784832	0.417694	0.833614
ITGAM	ITGAM	3684	CD11B|CR3A|MAC-1|MAC1A|MO1A|SLEB6	integrin_ alpha M (complement component 3 receptor 3 subunit)	6.81728	5.84357	5.49082	3.93723	2.38784	2.8087	6.0912	3.19343	23.7731	-0.851137	0.372042	0.830733
ITGAV	ITGAV	3685	CD51|MSK8|VNRA|VTNR	integrin_ alpha V	4.81728	7.13308	7.43568	6.09643	6.58249	7.72144	6.9981	7.08096	106.387	1.86329	0.326241	0.830733
ITGAX	ITGAX	3687	CD11C|SLEB6	integrin_ alpha X (complement component 3 receptor 4 subunit)	5.81728	6.25861	5.25635	6.71158	4.44288	6.29977	6.26113	5.36336	55.7682	-0.124179	0.894601	0.986676
ITGB1	ITGB1	3688	CD29|FNRB|GPIIA|MDF2|MSK12|VLA-BETA|VLAB	integrin_ beta 1 (fibronectin receptor_ beta polypeptide_ antigen CD29 includes MDF2_ MSK12)	4.81728	8.3175	9.98267	9.1734	8.94004	9.715	9.17867	8.42033	379.541	2.19009	0.382485	0.830733
ITGB2	ITGB2	3689	CD18|LAD|LCAMB|LFA-1|MAC-1|MF17|MFI7	integrin_ beta 2 (complement component 3 receptor 3 and 4 subunit)	5.81728	6.71804	8.29817	7.83689	5.8208	6.35201	7.26113	5.83151	107.038	0.55748	0.782868	0.948055
ITGB3	ITGB3	3690	BDPLT16|BDPLT2|CD61|GP3A|GPIIIa|GT	integrin_ beta 3 (platelet glycoprotein IIIa_ antigen CD61)	9.13921	5.25861	5.07578	2.6153	3.02527	3.51724	7.26113	1.67886	25.9277	-1.75995	0.243392	0.830733
ITGB5	ITGB5	3693	-	integrin_ beta 5	4.81728	6.42853	8.13467	6.24223	6.89034	8.38779	6.9981	6.42993	110.746	0.590717	0.588475	0.873549
ITGB6	ITGB6	3694	AI1H	integrin_ beta 6	4.81728	5.76111	4.49082	2.75826	1.70334	6.23251	4.67617	3.04143	18.1905	0.610053	0.652556	0.892083
ITGB8	ITGB8	3696	-	integrin_ beta 8	5.81728	6.71804	8.39771	5.77517	6.29687	5.46796	7.17867	5.10991	81.3009	-0.840664	0.452907	0.841702
ITK	ITK	3702	EMT|LPFS1|LYK|PSCTK2	IL2-inducible T-cell kinase	7.13921	4.84357	3.97625	4.6153	2.21792	2.30913	4.67617	2.33094	16.1511	-1.65208	0.101684	0.830733
ITPR1	ITPR1	3708	ACV|CLA4|INSP3R1|IP3R|IP3R1|PPP1R94|SCA15|SCA16|SCA29	inositol 1_4_5-trisphosphate receptor_ type 1	4.81728	4.84357	5.07578	5.43973	3.71617	5.38779	5.41313	4.79037	30.6004	0.0695409	0.94008	0.986676
ITPR3	ITPR3	3710	IP3R|IP3R3	inositol 1_4_5-trisphosphate receptor_ type 3	7.13921	4.84357	4.75385	4.43973	5.29259	5.41115	5.0912	5.34724	39.1196	0.952892	0.591383	0.873549
JAG1	JAG1	182	AGS|AHD|AWS|CD339|HJ1|JAGL1	jagged 1	6.40224	5.25861	5.25635	5.54209	4.76017	5.25205	7.41313	8.07485	63.7758	2.26427	0.0513101	0.830733
JAK1	JAK1	3716	JAK1A|JAK1B|JTK3	Janus kinase 1	6.81728	7.60438	8.03926	7.78856	7.42737	8.09951	7.41313	8.21135	204.379	1.88034	0.374421	0.830733
JAK2	JAK2	3717	JTK10|THCYT3	Janus kinase 2	9.2096	7.13308	6.89681	6.50405	4.9728	5.77758	7.9981	5.74187	109.838	-1.10575	0.170431	0.830733
JAK3	JAK3	3718	JAK-3|JAK3_HUMAN|JAKL|L-JAK|LJAK	Janus kinase 3	8.40224	6.13308	6.37834	5.9492	3.85018	4.16539	7.0912	4.47142	55.9138	-1.30282	0.101943	0.830733
JMJD1C	JMJD1C	221037	TRIP8	jumonji domain containing 1C	6.81728	5.84357	6.02687	6.21522	6.27969	5.73192	5.41313	5.46396	62.855	0.537352	0.767533	0.942317
JUN	JUN	3725	AP-1|AP1|c-Jun	jun proto-oncogene	7.62463	6.06596	8.43568	8.1178	7.47625	7.31997	7.55064	7.74956	186.439	-0.0184046	0.976891	0.989915
JUP	JUP	3728	ARVD12|CTNNG|DP3|DPIII|PDGB|PKGB	junction plakoglobin	7.13921	5.92157	6.37834	6.45451	6.81485	7.00765	6.55064	7.25952	103.306	2.17887	0.211211	0.830733
KAT2B	KAT2B	8850	CAF|P/CAF|PCAF	K(lysine) acetyltransferase 2B	7.13921	5.92157	6.07578	6.29947	5.66417	5.0732	6.55064	4.76632	61.2354	0.902194	0.569041	0.861393
KAT6A	KAT6A	7994	MOZ|MRD32|MYST-3|MYST3|RUNXBP2|ZC2HC6A|ZNF220	K(lysine) acetyltransferase 6A	6.40224	7.19721	7.07578	6.59639	7.299	9.26373	6.67617	6.71699	142.364	1.41299	0.225317	0.830733
KAT6B	KAT6B	23522	GTPTS|MORF|MOZ2|MYST4|ZC2HC6B|qkf|querkopf	K(lysine) acetyltransferase 6B	4.81728	5.13308	5.92378	5.90071	5.42737	6.29977	5.0912	4.94832	43.4923	0.183024	0.928803	0.986676
KDM1A	KDM1A	23028	AOF2|BHC110|KDM1|LSD1	lysine (K)-specific demethylase 1A	7.13921	6.95905	6.69245	6.22017	7.57547	6.33684	6.67617	6.33911	107.062	1.6791	0.352656	0.830733
KDM3B	KDM3B	51780	5qNCA|C5orf7|JMJD1B|NET22	lysine (K)-specific demethylase 3B	6.40224	6.53162	6.02687	6.57531	7.32015	7.37299	6.55064	5.69805	94.3359	1.89091	0.289319	0.830733
KDM5A	KDM5A	5927	RBBP-2|RBBP2|RBP2	lysine (K)-specific demethylase 5A	4.81728	5.481	6.69245	6.22017	5.48845	6.66547	7.0912	6.7572	71.0938	1.95873	0.250668	0.830733
KDM6A	KDM6A	7403	KABUK2|UTX|bA386N14.2	lysine (K)-specific demethylase 6A	9.13921	6.62784	6.72348	6.70982	5.58249	7.1271	7.41313	6.05638	121.3	-0.852155	0.19506	0.830733
KDR	KDR	3791	CD309|FLK1|VEGFR|VEGFR2	kinase insert domain receptor	4.81728	4.25861	4.16889	4.29713	3.8385	4.23251	4.67617	4.02125	19.5459	0.660514	0.469554	0.843836
KEAP1	KEAP1	9817	INrf2|KLHL19	kelch-like ECH-associated protein 1	5.81728	6.06596	6.07578	6.48361	6.03041	6.31223	5.67617	6.29357	68.3267	1.07234	0.536813	0.861393
KIF20A	KIF20A	10112	MKLP2|RAB6KIFL	kinesin family member 20A	4.81728	4.481	4.62832	4.65239	5.85599	4.50643	4.67617	5.41066	29.416	1.38793	0.215317	0.830733
KIF23	KIF23	9493	CHO1|KNSL5|MKLP-1|MKLP1	kinesin family member 23	6.40224	5.99557	6.89681	5.41836	5.42347	4.77308	6.26113	6.73878	63.4998	0.0976108	0.916568	0.986676
KIF2C	KIF2C	11004	CT139|KNSL6|MCAK	kinesin family member 2C	6.81728	4.481	5.41682	4.70982	4.77251	3.17907	6.67617	5.52256	36.6795	1.13551	0.220976	0.830733
KIR3DL2	KIR3DL2	3812	CD158K|NKAT-4|NKAT4|NKAT4B|p140	killer cell immunoglobulin-like receptor_ three domains_ long cytoplasmic tail_ 2	4.81728	1.67364	3.97625	1.35227	0.217916	-0.96389	3.0912	0.193432	3.46958	-0.738738	0.155988	0.830733
KIT	KIT	3815	C-Kit|CD117|PBT|SCFR	v-kit Hardy-Zuckerman 4 feline sarcoma viral oncogene homolog	4.81728	4.25861	5.16889	4.70982	3.65088	4.47352	6.0912	6.67886	31.5842	1.56768	0.134255	0.830733
KLF5	KLF5	688	BTEB2|CKLF|IKLF	Kruppel-like factor 5 (intestinal)	8.90474	5.99557	5.81275	6.43122	6.84873	3.20604	7.17867	6.53684	82.3855	-0.653294	0.454449	0.841702
KLK2	KLK2	3817	KLK2A2|hGK-1|hK2	kallikrein-related peptidase 2	7.13921	4.67364	4.62832	0.0303407	-0.104012	0.451148	6.41313	0.678859	7.9383	0.888969	0.549434	0.861393
KLK3	KLK3	354	APS|KLK2A1|PSA|hK3	kallikrein-related peptidase 3	8.13921	3.67364	4.86933	-0.384697	0.703343	-0.96389	5.0912	-0.128496	6.16866	-5.21917	0.0125974	0.830733
KLK4	KLK4	9622	AI2A1|ARM1|EMSP|EMSP1|KLK-L1|PRSS17|PSTS|kallikrein	kallikrein-related peptidase 4	6.81728	3.99557	3.16889	0.0303407	1.48095	3.23251	4.0912	1.67886	8.35101	1.58496	0.116851	0.830733
KLRB1	KLRB1	3820	CD161|CLEC5B|NKR|NKR-P1|NKR-P1A|NKRP1A|hNKR-P1A	killer cell lectin-like receptor subfamily B_ member 1	4.81728	2.67364	4.49082	4.43122	1.06591	2.40534	4.0912	2.62639	10.0229	-1.23704	0.254989	0.830733
KLRD1	KLRD1	3824	CD94	killer cell lectin-like receptor subfamily D_ member 1	5.81728	4.25861	4.49082	4.59258	2.06591	1.15159	4.67617	3.26382	13.8287	-1.32193	0.190529	0.830733
KLRG1	KLRG1	10219	2F1|CLEC15A|MAFA|MAFA-2F1|MAFA-L|MAFA-LIKE	killer cell lectin-like receptor subfamily G_ member 1	4.81728	3.25861	3.49082	3.07473	2.85018	2.03611	5.41313	3.15691	11.41	1.06413	0.159227	0.830733
KLRK1	KLRK1	22914	CD314|D12S2489E|KLR|NKG2-D|NKG2D	killer cell lectin-like receptor subfamily K_ member 1	6.40224	4.481	1.16889	4.96108	2.65088	1.35804	5.41313	3.29777	13.1467	-0.965235	0.375805	0.830733
KMT2A	KMT2A	4297	ALL-1|CXXC7|HRX|HTRX1|MLL|MLL-AF9|MLL/GAS7|MLL1|MLL1A|TET1-MLL|TRX1|WDSTS	lysine (K)-specific methyltransferase 2A	5.81728	6.25861	6.12309	5.80513	5.46584	6.27133	6.0912	5.42609	60.0179	1.10286	0.488503	0.85316
KMT2D	KMT2D	8085	AAD10|ALR|CAGL114|KABUK1|KMS|MLL2|MLL4|TNRC21	lysine (K)-specific methyltransferase 2D	6.40224	7.67364	7.31864	7.39119	6.47153	8.08777	7.61477	7.5615	159.251	1.81119	0.372341	0.830733
KPNA2	KPNA2	3838	IPOA1|QIP2|RCH1|SRP1alpha	karyopherin alpha 2 (RAG cohort 1_ importin alpha 1)	9.06521	7.25861	9.02064	8.20402	8.26012	7.55181	8.89856	8.3442	320.77	-0.0760667	0.850292	0.976261
KRAS	KRAS	3845	C-K-RAS|CFC2|K-RAS2A|K-RAS2B|K-RAS4A|K-RAS4B|KI-RAS|KRAS1|KRAS2|NS|NS3|RALD|RASK2	Kirsten rat sarcoma viral oncogene homolog	5.81728	6.3175	6.02687	5.32036	4.33893	6.14812	5.89856	5.33911	50.2427	-0.0740006	0.932301	0.986676
KRT16	KRT16	3868	CK16|FNEPPK|K16|K1CP|KRT16A|NEPPK|PC1	keratin 16_ type I	6.40224	5.13308	5.56121	1.78523	3.90722	1.2585	8.33913	7.42225	31.4744	2.97881	0.0634853	0.830733
KRT17	KRT17	3872	K17|PC|PC2|PCHC1	keratin 17_ type I	6.40224	6.25861	7.93708	5.95515	7.55777	5.39366	10.168	11.5043	200.45	3.56405	0.0343229	0.830733
LAG3	LAG3	3902	CD223	lymphocyte-activation gene 3	7.9872	6.13308	5.25635	5.07473	3.00451	1.91058	6.55064	2.9159	28.9226	-1.57173	0.109187	0.830733
LAIR1	LAIR1	3903	CD305|LAIR-1	leukocyte-associated immunoglobulin-like receptor 1	8.72417	6.25861	5.92378	5.86006	3.96208	4.77308	6.79164	5.01106	60.2571	-1.59481	0.0524724	0.830733
LAMA2	LAMA2	3908	LAMM	laminin_ alpha 2	6.81728	2.67364	3.97625	4.93121	4.00451	6.81528	5.89856	3.33094	27.9729	2.13386	0.111463	0.830733
LAMA4	LAMA4	3910	CMD1JJ|LAMA3|LAMA4*-1	laminin_ alpha 4	4.81728	4.481	5.69245	5.46497	5.30962	4.88578	4.67617	6.22906	36.6195	0.620713	0.599461	0.873549
LAMB1	LAMB1	3912	CLM|LIS5	laminin_ beta 1	8.72417	7.50653	7.41682	6.53417	8.24527	7.62732	7.17867	6.02125	169.692	-0.0402836	0.936697	0.986676
LAMB3	LAMB3	3914	AI1A|BM600-125KDA|LAM5|LAMNB1	laminin_ beta 3	6.40224	7.55629	5.69245	5.23001	5.00451	5.71793	7.0912	8.10752	81.5872	0.85877	0.454651	0.841702
LAMC1	LAMC1	3915	LAMB2	laminin_ gamma 1 (formerly LAMB2)	4.81728	5.67364	6.59516	6.17755	7.11273	6.73192	6.9981	6.4527	79.8868	2.24435	0.188235	0.830733
LAMC2	LAMC2	3918	B2T|BM600|CSF|EBR2|EBR2A|LAMB2T|LAMNB2	laminin_ gamma 2	5.81728	5.25861	4.16889	2.6742	4.57547	2.03611	5.41313	4.31445	19.4577	0.434403	0.635517	0.88544
LAMTOR1	LAMTOR1	55004	C11orf59|PDRO|Ragulator1|p18|p27RF-Rho	late endosomal/lysosomal adaptor_ MAPK and MTOR activator 1	8.72417	6.19721	6.21328	6.40538	4.94038	6.0436	7.33913	5.27238	83.9782	-0.883591	0.197656	0.830733
LAMTOR2	LAMTOR2	28956	ENDAP|HSPC003|MAPBPIP|MAPKSP1AP|ROBLD3|Ragulator2|p14	late endosomal/lysosomal adaptor_ MAPK and MTOR activator 2	7.13921	5.67364	6.21328	7.24951	6.37172	7.20102	6.9981	6.3103	100.051	0.655715	0.491648	0.85464
LAMTOR4	LAMTOR4	389541	C7orf59	late endosomal/lysosomal adaptor_ MAPK and MTOR activator 4	6.40224	7.3175	6.89681	6.63211	7.14392	6.5907	7.55064	6.25952	115.294	1.65993	0.375029	0.830733
LAMTOR5	LAMTOR5	10542	HBXIP|XIP	late endosomal/lysosomal adaptor_ MAPK and MTOR activator 5	4.81728	3.25861	1.16889	0.73078	-0.296657	0.621073	3.0912	1.33094	3.58076	0.204884	0.417779	0.833614
LAT	LAT	27040	LAT1|pp36	linker for activation of T cells	4.81728	5.25861	5.25635	5.15962	3.16277	4.19261	6.26113	3.98003	27.1156	-0.104337	0.893209	0.986676
LATS1	LATS1	9113	WARTS|wts	large tumor suppressor kinase 1	7.13921	6.13308	6.45429	6.29947	6.70334	6.51454	7.48352	7.14995	106.497	2.28519	0.188568	0.830733
LCK	LCK	3932	IMD22|LSK|YT16|p56lck|pp58lck	LCK proto-oncogene_ Src family tyrosine kinase	6.81728	5.58053	4.33882	5.57724	3.23584	2.8087	5.67617	4.10032	27.225	-0.968291	0.290255	0.830733
LCN2	LCN2	3934	24p3|MSFI|NGAL	lipocalin 2	4.81728	1.67364	7.31864	3.50607	3.04574	6.97471	5.0912	2.72949	21.0332	0.47202	0.840176	0.973662
LDHA	LDHA	3939	GSD11|HEL-S-133P|LDHM|PIG19	lactate dehydrogenase A	8.72417	8.65092	9.41206	7.78272	9.28535	8.84668	8.92409	9.67846	482.056	0.602255	0.141206	0.830733
LIG1	LIG1	3978	-	ligase I_ DNA_ ATP-dependent	6.81728	5.84357	6.25635	6.22263	7.44288	5.67032	6.26113	6.87432	85.8389	1.06206	0.270049	0.830733
LILRB2	LILRB2	10288	CD85D|ILT-4|ILT4|LIR-2|LIR2|MIR-10|MIR10	leukocyte immunoglobulin-like receptor_ subfamily B (with TM and ITIM domains)_ member 2	6.81728	4.99557	5.33882	6.11515	3.63746	3.40534	6.0912	3.22906	30.9901	-0.927244	0.326657	0.830733
LIN9	LIN9	286826	BARA|BARPsv|Lin-9|TGS|TGS1|TGS2	lin-9 DREAM MuvB core complex component	6.81728	5.13308	5.33882	4.48977	5.3472	3.42843	6.26113	5.73569	39.9168	0.969626	0.227392	0.830733
LMNB1	LMNB1	4001	ADLD|LMN|LMN2|LMNB	lamin B1	7.62463	6.53162	5.62832	6.38128	6.22914	6.0172	6.26113	5.91042	80.0578	-0.0478947	0.877548	0.984565
LOX	LOX	4015	-	lysyl oxidase	4.81728	6.06596	7.95025	4.91298	6.55062	6.85842	6.67617	7.12889	82.7147	0.369088	0.726759	0.927459
LRRC32	LRRC32	2615	D11S833E|GARP	leucine rich repeat containing 32	6.40224	1.67364	4.62832	4.23979	4.37172	6.947	6.41313	4.45647	29.6825	2.67671	0.0281332	0.830733
LTA	LTA	4049	LT|TNFB|TNFSF1	lymphotoxin alpha	7.13921	5.84357	4.86933	1.93723	1.41955	0.621073	5.67617	1.95897	12.845	-1.75207	0.166153	0.830733
LTB	LTB	4050	TNFC|TNFSF3|p33	lymphotoxin beta (TNF superfamily_ member 3)	7.9872	7.62784	5.69245	6.15705	3.63746	2.58043	6.41313	5.02125	49.8528	-2.03308	0.0195794	0.830733
LTBP1	LTBP1	4052	-	latent transforming growth factor beta binding protein 1	4.81728	5.76111	6.41682	5.54604	6.01493	6.53861	5.41313	5.40289	53.4031	0.737811	0.687547	0.904493
LTBR	LTBR	4055	CD18|D12S370|LT-BETA-R|TNF-R-III|TNFCR|TNFR-RP|TNFR2-RP|TNFR3|TNFRSF3	lymphotoxin beta receptor (TNFR superfamily_ member 3)	6.40224	7.28835	7.12309	6.03316	5.27537	6.91058	7.33913	7.58231	107.209	1.63128	0.392231	0.832055
LY96	LY96	23643	ESOP-1|MD-2|MD2|ly-96	lymphocyte antigen 96	8.9872	6.8831	6.69245	5.55782	4.44288	4.67997	7.41313	4.79037	72.5481	-1.54452	0.0910362	0.830733
LYN	LYN	4067	JTK8|p53Lyn|p56Lyn	LYN proto-oncogene_ Src family tyrosine kinase	4.81728	5.84357	5.86933	6.01903	4.79081	5.01339	5.41313	4.67886	39.5519	-0.120929	0.941338	0.986676
MAFG	MAFG	4097	hMAF	v-maf avian musculoaponeurotic fibrosarcoma oncogene homolog G	6.81728	6.13308	6.25635	5.6228	6.26012	6.03986	6.55064	6.96954	80.5162	1.90176	0.245223	0.830733
MAGEC1	MAGEC1	9947	CT7|CT7.1	melanoma antigen family C1	8.27671	4.99557	4.62832	0.937231	-0.782084	-0.226924	5.41313	0.678859	7.94531	-4.77007	0.00993605	0.830733
MAGEC2	MAGEC2	51438	CT10|HCA587|MAGEE1	melanoma antigen family C2	7.81728	4.99557	4.75385	-0.162304	0.35542	-0.226924	6.0912	0.456467	8.05604	-1.71049	0.24957	0.830733
MALL	MALL	7851	BENE	mal_ T-cell differentiation protein-like	7.40224	4.481	5.41682	5.64137	3.90722	5.17225	6.26113	5.59942	44.7923	0.370112	0.504878	0.861393
MAML2	MAML2	84441	MAM-3|MAM2|MAM3|MLL-MAML2	mastermind-like transcriptional coactivator 2	7.40224	4.84357	5.07578	4.6002	5.19061	3.67997	5.89856	4.42609	35.2519	0.188072	0.56545	0.861393
MAP2K1	MAP2K1	5604	CFC3|MAPKK1|MEK1|MKK1|PRKMK1	mitogen-activated protein kinase kinase 1	4.81728	6.99557	7.35872	6.98308	6.15808	7.15505	7.48352	7.18439	108.908	1.64017	0.391015	0.832055
MAP2K2	MAP2K2	5605	CFC4|MAPKK2|MEK2|MKK2|PRKMK2	mitogen-activated protein kinase kinase 2	6.40224	5.99557	6.45429	6.82962	5.53984	6.66789	6.9981	6.01106	82.2719	1.49195	0.386474	0.832055
MAP3K14	MAP3K14	9020	FTDCR1B|HS|HSNIK|NIK	mitogen-activated protein kinase kinase kinase 14	7.40224	6.19721	5.41682	5.35677	5.37172	5.90236	5.41313	4.76632	53.0147	-0.185746	0.781555	0.948055
MAP3K7	MAP3K7	6885	MEKK7|TAK1|TGF1a	mitogen-activated protein kinase kinase kinase 7	4.81728	6.481	7.14617	6.72905	6.70173	7.31378	6.89856	7.46209	103.516	1.95663	0.291711	0.830733
MAPK1	MAPK1	5594	ERK|ERK-2|ERK2|ERT1|MAPK2|P42MAPK|PRKM1|PRKM2|p38|p40|p41|p41mapk|p42-MAPK	mitogen-activated protein kinase 1	4.81728	7.13308	7.27742	8.27589	7.61794	9.19135	7.94919	7.93085	184.072	1.08688	0.318249	0.830733
MAPK13	MAPK13	5603	MAPK 13|MAPK-13|PRKM13|SAPK4|p38delta	mitogen-activated protein kinase 13	7.81728	6.19721	5.97625	6.33868	5.15338	6.38484	7.0912	5.50813	79.2517	-0.0219426	0.94806	0.987561
MAPK14	MAPK14	1432	CSBP|CSBP1|CSBP2|CSPB1|EXIP|Mxi2|PRKM14|PRKM15|RK|SAPK2A|p38|p38ALPHA	mitogen-activated protein kinase 14	8.40224	7.1655	7.73875	7.41404	7.03682	7.57656	7.67617	7.39507	187.486	-0.0730091	0.643698	0.888518
MAPK3	MAPK3	5595	ERK-1|ERK1|ERT2|HS44KDAP|HUMKER1A|P44ERK1|P44MAPK|PRKM3|p44-ERK1|p44-MAPK	mitogen-activated protein kinase 3	8.27671	5.92157	6.75385	6.48361	5.96745	5.75949	7.26113	5.8257	92.4877	-0.446118	0.285696	0.830733
MAPK8	MAPK8	5599	JNK|JNK-46|JNK1|JNK1A2|JNK21B1/2|PRKM8|SAPK1|SAPK1c	mitogen-activated protein kinase 8	5.81728	4.481	4.97625	4.92516	5.60679	5.62107	4.67617	5.72949	37.5086	1.16756	0.536646	0.861393
MCL1	MCL1	4170	BCL2L3|EAT|MCL1-ES|MCL1L|MCL1S|Mcl-1|TM|bcl2-L-3|mcl1/EAT	myeloid cell leukemia 1	8.51772	7.0312	7.23498	7.77349	6.5107	8.05199	8.0912	7.18439	187.333	0.0932403	0.79757	0.953623
MCM2	MCM2	4171	BM28|CCNL1|CDCL1|D3S3194|MITOTIN|cdc19	minichromosome maintenance complex component 2	6.81728	6.06596	5.81275	7.03597	6.79535	5.01339	6.79164	6.39507	81.0604	0.384798	0.682661	0.901494
MCM4	MCM4	4173	CDC21|CDC54|NKCD|NKGCD|P1-CDC21|hCdc21	minichromosome maintenance complex component 4	4.81728	7.42853	6.45429	8.66968	8.14688	8.08868	6.89856	8.16268	161.269	0.522193	0.640074	0.88632
MDM2	MDM2	4193	ACTFS|HDMX|hdm2	MDM2 proto-oncogene_ E3 ubiquitin protein ligase	5.81728	7.481	7.96331	7.30763	7.20433	7.32766	6.89856	7.07852	140.535	1.34424	0.505251	0.861393
MET	MET	4233	AUTS9|DFNB97|HGFR|RCCP2|c-Met	MET proto-oncogene_ receptor tyrosine kinase	6.81728	4.481	5.81275	4.09643	4.3798	3.33379	5.41313	3.29777	26.0641	-0.703018	0.444962	0.839259
MGA	MGA	23269	MAD5|MXD5	MGA_ MAX dimerization protein	7.62463	6.80293	7.39771	6.43122	6.3327	6.87321	6.41313	6.65614	112.709	-0.169925	0.673105	0.89879
MKI67	MKI67	4288	KIA|MIB-|MIB-1|PPP1R105	marker of proliferation Ki-67	6.40224	6.481	6.37834	7.52019	6.84436	6.59835	6.26113	8.17871	114.012	0.70514	0.510448	0.861393
MLH1	MLH1	4292	COCA2|FCC2|HNPCC|HNPCC2|hMLH1	mutL homolog 1	5.81728	5.58053	5.25635	6.76166	5.55062	6.18586	6.0912	6.46769	62.4185	0.487864	0.601811	0.873549
MLST8	MLST8	64223	GBL|GbetaL|LST8|POP3|WAT1	MTOR associated protein_ LST8 homolog	6.81728	6.06596	6.49082	6.56172	5.62391	6.2872	7.41313	6.85735	91.4348	1.80537	0.299408	0.830733
MMP9	MMP9	4318	CLG4B|GELB|MANDP2|MMP-9	matrix metallopeptidase 9	5.81728	6.25861	6.02687	5.43122	6.3798	3.35804	4.0912	5.07118	39.5135	-0.333243	0.784328	0.948055
MNDA	MNDA	4332	PYHIN3	myeloid cell nuclear differentiation antigen	8.51772	6.37408	6.07578	5.80513	3.85018	4.13765	7.33913	4.57194	57.042	-1.14632	0.188125	0.830733
MS4A1	MS4A1	931	B1|Bp35|CD20|CVID5|LEU-16|MS4A2|S7	membrane-spanning 4-domains_ subfamily A_ member 1	5.81728	3.67364	3.49082	5.01903	1.53984	1.03611	5.41313	3.62639	13.0143	-0.736966	0.562579	0.861393
MS4A2	MS4A2	2206	APY|ATOPY|FCER1B|FCERI|IGEL|IGER|IGHER|MS4A1	membrane-spanning 4-domains_ subfamily A_ member 2	7.13921	4.25861	2.75385	1.20027	0.895988	0.773076	3.0912	-0.128496	5.64887	-0.577604	0.356785	0.830733
MS4A4A	MS4A4A	51338	4SPAN1|CD20-L1|CD20L1|HDCME31P|MS4A4|MS4A7	membrane-spanning 4-domains_ subfamily A_ member 4A	6.81728	6.58053	7.31864	6.65239	4.77251	6.06586	5.89856	5.59942	74.1898	0.150119	0.933837	0.986676
MSH2	MSH2	4436	COCA1|FCC1|HNPCC|HNPCC1|LCFS2	mutS homolog 2	4.81728	5.58053	6.33882	6.57144	6.91558	6.13063	5.67617	6.72949	68.3558	0.634838	0.533895	0.861393
MSLN	MSLN	10232	MPF|SMRP	mesothelin	7.13921	7.25861	7.84132	7.01191	1.53984	0.451148	6.26113	2.77839	32.7902	-3.33985	0.0381005	0.830733
MST1R	MST1R	4486	CD136|CDw136|PTK8|RON	macrophage stimulating 1 receptor	8.40224	6.06596	5.62832	4.92516	3.96208	5.20604	6.67617	3.93759	48.5179	-1.22867	0.124458	0.830733
MTHFD2	MTHFD2	10797	NMDMC	methylenetetrahydrofolate dehydrogenase (NADP+ dependent) 2_ methenyltetrahydrofolate cyclohydrolase	7.13921	7.1655	7.14617	8.03456	6.80438	7.30446	7.0912	7.82861	159.152	1.61809	0.421126	0.833614
MTOR	MTOR	2475	FRAP|FRAP1|FRAP2|RAFT1|RAPT1	mechanistic target of rapamycin (serine/threonine kinase)	4.81728	5.13308	5.92378	5.25916	5.26231	5.58043	6.0912	4.98003	41.6692	0.42164	0.570107	0.861393
MUC1	MUC1	4582	ADMCKD|ADMCKD1|CA 15-3|CD227|EMA|H23AG|KL-6|MAM6|MCD|MCKD|MCKD1|MUC-1|MUC-1/SEC|MUC-1/X|MUC1/ZD|PEM|PEMT|PUM	mucin 1_ cell surface associated	5.81728	4.67364	6.02687	7.69923	5.28831	10.3791	6.9981	4.15691	83.2818	2.32139	0.319468	0.830733
MUC16	MUC16	94025	CA125	mucin 16_ cell surface associated	4.81728	5.481	5.97625	5.31574	5.99402	0.258502	5.67617	0.193432	18.559	-0.645335	0.6324	0.884799
MX1	MX1	4599	IFI-78K|IFI78|MX|MxA	MX dynamin-like GTPase 1	4.81728	6.92157	6.29817	6.57916	5.87613	4.15159	6.0912	6.42993	59.5335	0.482112	0.786223	0.948055
MYB	MYB	4602	Cmyb|c-myb|c-myb_CDS|efg	v-myb avian myeloblastosis viral oncogene homolog	4.81728	6.25861	3.97625	3.31574	2.45058	3.86054	5.67617	2.95897	17.9295	-1	0.356798	0.830733
MYBL2	MYBL2	4605	B-MYB|BMYB	v-myb avian myeloblastosis viral oncogene homolog-like 2	9.51772	7.73973	7.62832	7.74115	5.81485	5.36404	8.87256	7.57194	184.988	-0.719964	0.359894	0.830733
MYC	MYC	4609	MRTL|MYCC|bHLHe39|c-Myc	v-myc avian myelocytomatosis viral oncogene homolog	7.62463	7.22823	7.21328	7.48155	8.41906	6.501	8.26113	8.63638	203.75	1.14515	0.0604697	0.830733
MYD88	MYD88	4615	MYD88D	myeloid differentiation primary response 88	4.81728	7.09991	6.86933	7.86797	5.99665	7.60723	7.67617	6.9159	115.865	1.58891	0.422374	0.833614
MYL9	MYL9	10398	LC20|MLC-2C|MLC2|MRLC1|MYRL2	myosin_ light chain 9_ regulatory	4.81728	6.67364	8.48177	7.60209	7.52717	8.62794	8.44876	7.10512	170.128	2.25951	0.290319	0.830733
NANOG	NANOG	79923	-	Nanog homeobox	4.81728	3.25861	3.97625	3.31574	2.96208	3.75493	5.89856	3.29777	15.0339	1.64386	0.0434433	0.830733
NBL1	NBL1	4681	D1S1733E|DAN|DAND1|NB|NO3	neuroblastoma 1_ DAN family BMP antagonist	4.81728	5.76111	5.81275	5.37019	4.31384	5.87741	6.26113	4.59942	40.8324	0.957144	0.517504	0.861393
NCAPG	NCAPG	64151	CAPG|CHCG|NY-MEL-3|YCG1	non-SMC condensin I complex_ subunit G	7.13921	3.99557	4.97625	3.63025	4.32225	1.97471	3.0912	4.00079	17.6461	0.234465	0.821756	0.961987
NCF1	NCF1	653361	NCF1A|NOXO2|SH3PXD1A|p47phox	neutrophil cytosolic factor 1	5.81728	4.67364	5.41682	5.87896	3.23584	3.58043	4.0912	3.75415	23.5237	-1.54314	0.162091	0.830733
NCF2	NCF2	4688	NCF-2|NOXA2|P67-PHOX|P67PHOX	neutrophil cytosolic factor 2	4.81728	5.37408	5.75385	5.78856	3.71617	4.095	5.67617	4.22906	30.5113	-0.0882959	0.950014	0.987561
NCK1	NCK1	4690	NCK|NCKalpha|nck-1	NCK adaptor protein 1	5.81728	5.76111	6.25635	5.49387	5.17211	4.67997	6.67617	5.94832	52.9165	1.2317	0.426891	0.833614
NCOA2	NCOA2	10499	GRIP1|KAT13C|NCoA-2|SRC2|TIF2|bHLHe75	nuclear receptor coactivator 2	6.40224	4.67364	6.25635	7.14798	5.0759	6.791	5.0912	5.05141	56.1501	-0.300579	0.822344	0.961987
NCOR1	NCOR1	9611	N-CoR|N-CoR1|PPP1R109|TRAC1|hN-CoR	nuclear receptor corepressor 1	5.81728	5.13308	5.97625	5.49387	4.30538	5.06586	6.0912	4.89387	40.704	-0.0882272	0.908159	0.986676
NCR1	NCR1	9437	CD335|LY94|NK-p46|NKP46	natural cytotoxicity triggering receptor 1	5.81728	4.25861	2.16889	3.47328	0.217916	0.258502	4.0912	0.456467	6.03255	-2.16993	0.0753806	0.830733
NDUFA2	NDUFA2	4695	B8|CD14|CIB8	NADH dehydrogenase (ubiquinone) 1 alpha subcomplex_ 2_ 8kDa	5.81728	6.92157	7.41682	7.5411	7.57986	8.35428	7.26113	6.96162	150.301	2.03412	0.311309	0.830733
NDUFB1	NDUFB1	4707	CI-MNLL|CI-SGDH|MNLL	NADH dehydrogenase (ubiquinone) 1 beta subcomplex_ 1_ 7kDa	7.9872	6.67364	7.33882	7.3169	6.04319	7.67273	6.55064	6.25952	126.267	-0.315438	0.484851	0.848774
NEIL3	NEIL3	55247	FGP2|FPG2|NEI3|ZGRF3|hFPG2|hNEI3	nei-like DNA glycosylase 3	4.81728	3.67364	3.75385	2.78523	2.98345	1.15159	5.41313	2.67886	10.6084	1.152	0.136839	0.830733
NEK2	NEK2	4751	HsPK21|NEK2A|NLK1|PPP1R111|RP67	NIMA-related kinase 2	8.40224	5.37408	5.81275	3.53814	2.87327	2.53861	6.89856	4.88273	32.9007	-1.14608	0.298363	0.830733
NF1	NF1	4763	NFNS|VRNF|WSS	neurofibromin 1	5.81728	5.58053	5.69245	5.36573	4.71617	5.84775	6.0912	5.37135	47.1867	1.2601	0.382487	0.830733
NFAM1	NFAM1	150372	CNAIP|bK126B4.4	NFAT activating protein with ITAM motif 1	7.13921	5.58053	4.49082	3.53814	1.98345	2.87741	6.67617	2.67886	20.6859	0.532495	0.634695	0.88544
NFATC2	NFATC2	4773	NFAT1|NFATP	nuclear factor of activated T-cells_ cytoplasmic_ calcineurin-dependent 2	6.40224	5.481	5.81275	5.5262	3.58249	5.71793	6.0912	4.61297	42.3224	-0.0480943	0.95334	0.987561
NFE2L2	NFE2L2	4780	HEBP1|NRF2	nuclear factor_ erythroid 2-like 2	4.81728	5.92157	6.84132	5.90992	5.63746	6.73886	5.67617	6.6197	64.9062	0.334183	0.738031	0.930669
NFKB1	NFKB1	4790	EBP-1|KBF1|NF-kB1|NF-kappa-B|NF-kappaB|NFKB-p105|NFKB-p50|NFkappaB|p105|p50	nuclear factor of kappa light polypeptide gene enhancer in B-cells 1	4.81728	6.62784	5.69245	6.33184	5.30113	6.46796	6.0912	6.5926	63.5706	0.296493	0.744685	0.937471
NFKB2	NFKB2	4791	CVID10|H2TF1|LYT-10|LYT10|NF-kB2|p100|p52	nuclear factor of kappa light polypeptide gene enhancer in B-cells 2 (p49/p100)	4.81728	7.97742	6.29817	7.25916	5.53984	6.36104	6.67617	6.46396	85.8729	0.78167	0.682557	0.901494
NKG7	NKG7	4818	GIG1|GMP-17|p15-TIA-1	natural killer cell granule protein 7	5.81728	5.92157	6.02687	8.05271	4.87898	3.45115	6.41313	4.96954	51.6753	-1.63306	0.171354	0.830733
NKX3-1	NKX3-1	4824	BAPX2|NKX3|NKX3.1|NKX3A	NK3 homeobox 1	8.40224	5.84357	4.75385	1.48977	2.45058	7.02858	7.0912	3.15691	32.6065	-0.0354779	0.978348	0.989915
NME1	NME1	4830	AWD|GAAD|NB|NBS|NDKA|NDPK-A|NDPKA|NM23|NM23-H1	NME/NM23 nucleoside diphosphate kinase 1	4.81728	6.92157	8.21328	7.18895	7.98345	6.5439	6.89856	7.19793	125.419	0.090929	0.929812	0.986676
NOS3	NOS3	4846	ECNOS|eNOS	nitric oxide synthase 3 (endothelial cell)	7.81728	3.25861	4.16889	3.33412	2.48095	4.05106	3.0912	2.04143	13.7413	-1.80735	0.167694	0.830733
NOTCH3	NOTCH3	4854	CADASIL|CASIL|IMF2|LMNS	notch 3	6.40224	6.25861	7.35872	6.82313	6.12721	7.43983	7.17867	8.08704	124.451	2.0852	0.276783	0.830733
NRAS	NRAS	4893	ALPS4|CMNS|N-ras|NCMS|NRAS1|NS6	neuroblastoma RAS viral (v-ras) oncogene homolog	5.81728	7.13308	7.12309	7.07883	7.1522	7.15505	7.33913	7.36936	129.877	1.89107	0.322951	0.830733
NSD1	NSD1	64324	ARA267|KMT3B|SOTOS|SOTOS1|STO	nuclear receptor binding SET domain protein 1	7.40224	6.42853	6.37834	6.65056	6.1837	7.28087	7.0912	7.0085	111.662	0.795461	0.124021	0.830733
NT5E	NT5E	4907	CALJA|CD73|E5NT|NT|NT5|NTE|eN|eNT	5'-nucleotidase_ ecto (CD73)	7.81728	5.37408	5.56121	3.42266	3.33893	2.97471	5.0912	3.19343	24.1959	-2.44478	0.0111789	0.830733
NUDT2	NUDT2	318	APAH1	nudix (nucleoside diphosphate linked moiety X)-type motif 2	6.40224	1.67364	4.62832	3.47328	2.87327	3.943	5.41313	2.11943	14.0821	0.206451	0.809272	0.955711
NUF2	NUF2	83540	CDCA1|CT106|NUF2R	NUF2_ NDC80 kinetochore complex component	4.81728	3.99557	4.75385	4.89453	6.0932	4.39366	5.89856	5.72325	33.6198	1.78526	0.0834291	0.830733
OAS1	OAS1	4938	IFI-4|OIAS|OIASI	2'-5'-oligoadenylate synthetase 1_ 40/46kDa	8.13921	7.37408	6.56121	7.175	6.35132	6.62857	6.67617	6.15228	117.966	-0.689477	0.0159324	0.830733
OAS2	OAS2	4939	-	2'-5'-oligoadenylate synthetase 2_ 69/71kDa	4.81728	7.82339	7.02687	8.09171	6.81634	5.54918	6.9981	7.03892	109.154	0.789128	0.697895	0.909342
OAS3	OAS3	4940	p100|p100OAS	2'-5'-oligoadenylate synthetase 3_ 100kDa	7.13921	7.455	6.56121	7.09643	6.92251	5.12357	5.67617	6.26382	92.3948	-0.64291	0.555821	0.861393
OSM	OSM	5008	-	oncostatin M	7.81728	4.481	4.86933	0.73078	-0.296657	1.84346	4.67617	1.04143	8.84799	-4.05889	0.0131102	0.830733
OSMR	OSMR	9180	OSMRB|PLCA1	oncostatin M receptor	4.81728	4.25861	7.54393	5.27827	6.38182	7.24881	6.41313	5.29777	59.9194	0.551642	0.647003	0.889931
P4HA2	P4HA2	8974	-	prolyl 4-hydroxylase_ alpha polypeptide II	7.62463	5.481	6.12309	3.88832	4.63746	6.05477	7.17867	4.92679	53.4212	0.613721	0.303329	0.830733
P4HB	P4HB	5034	CLCRP1|DSI|ERBA2L|GIT|P4Hbeta|PDI|PDIA1|PHDB|PO4DB|PO4HB|PROHB	prolyl 4-hydroxylase_ beta polypeptide	4.81728	9.34607	10.7818	9.18706	10.1221	10.6491	9.5006	11.0683	691.714	2.99694	0.274279	0.830733
PA2G4	PA2G4	5036	EBP1|HG4-1|p38-2G4	proliferation-associated 2G4_ 38kDa	5.81728	6.13308	6.62832	6.93723	7.103	6.58814	6.0912	7.33707	95.6316	1.68145	0.362376	0.830733
PAK2	PAK2	5062	PAK65|PAKgamma	p21 protein (Cdc42/Rac)-activated kinase 2	5.81728	6.76111	6.56121	7.55977	7.5308	7.76856	6.89856	7.29986	130.205	2.1112	0.274249	0.830733
PARD3	PARD3	56288	ASIP|Baz|PAR3|PAR3alpha|PARD-3|PARD3A|PPP1R118|SE2-5L16|SE2-5LT1|SE2-5T2	par-3 family cell polarity regulator	5.81728	6.06596	5.41682	6.31343	4.65088	5.67515	5.89856	4.62639	47.1132	-0.438689	0.61186	0.876379
PARP1	PARP1	142	ADPRT|ADPRT 1|ADPRT1|ARTD1|PARP|PARP-1|PPOL|pADPRT-1	poly (ADP-ribose) polymerase 1	5.81728	8.38789	8.03926	8.68408	8.58117	7.8054	7.41313	8.70834	243.803	1.78845	0.431645	0.839259
PARP2	PARP2	10038	ADPRT2|ADPRTL2|ADPRTL3|ARTD2|PARP-2|pADPRT-2	poly (ADP-ribose) polymerase 2	7.81728	4.99557	5.86933	5.31111	4.53984	4.67032	6.79164	4.47142	47.1215	-0.317858	0.55593	0.861393
PARP3	PARP3	10039	ADPRT3|ADPRTL2|ADPRTL3|ARTD3|IRT1|PADPRT-3	poly (ADP-ribose) polymerase family_ member 3	4.81728	3.25861	3.49082	3.92516	2.62391	3.97471	3.0912	3.19343	11.6875	0.784271	0.480024	0.847523
PARVA	PARVA	55742	CH-ILKBP|MXRA2	parvin_ alpha	5.81728	5.481	6.59516	5.98163	6.98212	7.09861	6.0912	7.21135	84.8765	1.29278	0.194958	0.830733
PBRM1	PBRM1	55193	BAF180|PB1	polybromo 1	8.40224	6.06596	5.81275	4.6597	4.33062	5.55967	6.89856	4.41066	54.4749	-0.870584	0.247232	0.830733
PCLAF	PCLAF	NA	NA	NA	4.81728	5.481	6.97625	6.40103	7.19176	6.11648	6.0912	7.10512	77.3064	0.731939	0.467782	0.842916
PCNA	PCNA	5111	ATLD2	proliferating cell nuclear antigen	5.81728	6.95905	6.07578	8.97176	7.44385	6.81965	7.0912	7.86303	140.089	-0.114578	0.920692	0.986676
PDCD1	PDCD1	5133	CD279|PD-1|PD1|SLEB2|hPD-1|hPD-l|hSLE1	programmed cell death 1	7.40224	4.25861	3.97625	3.75826	2.18139	1.77308	6.26113	1.77839	15.1755	0.263034	0.784126	0.948055
PDCD1LG2	PDCD1LG2	80380	B7DC|Btdc|CD273|PD-L2|PDCD1L2|PDL2|bA574F11.2	programmed cell death 1 ligand 2	5.81728	5.58053	5.49082	4.8377	2.59643	3.30913	5.0912	3.65286	23.3766	-1.39999	0.382592	0.830733
PDGFB	PDGFB	5155	IBGC5|PDGF-2|PDGF2|SIS|SSV|c-sis	platelet-derived growth factor beta polypeptide	6.81728	3.67364	4.33882	3.6153	4.26231	4.42843	5.0912	2.72949	20.6713	1.09516	0.299962	0.830733
PDGFRA	PDGFRA	5156	CD140A|PDGFR-2|PDGFR2|RHEPDGFRA	platelet-derived growth factor receptor_ alpha polypeptide	7.40224	6.06596	6.45429	4.99034	5.03554	5.49007	6.67617	4.99045	59.2249	-0.0494687	0.91207	0.986676
PDGFRB	PDGFRB	5159	CD140B|IBGC4|IMF1|JTK12|PDGFR|PDGFR-1|PDGFR1	platelet-derived growth factor receptor_ beta polypeptide	7.13921	6.53162	7.66074	6.71859	6.70656	7.68955	7.17867	6.17529	125.804	1.67657	0.378623	0.830733
PDK1	PDK1	5163	-	pyruvate dehydrogenase kinase_ isozyme 1	4.81728	5.13308	8.03926	6.01618	6.33893	5.15851	5.41313	5.72325	56.884	-0.97034	0.448959	0.839259
PDLIM5	PDLIM5	10611	ENH|ENH1|L9|LIM	PDZ and LIM domain 5	4.81728	6.62784	7.35872	7.33526	7.50517	7.93496	7.61477	7.42609	135.065	2.2921	0.242156	0.830733
PDPK1	PDPK1	5170	PDK1|PDPK2|PDPK2P|PRO0461	3-phosphoinositide dependent protein kinase 1	6.40224	6.06596	6.52644	6.82638	5.60335	7.16539	6.67617	6.77237	90.8106	1.66071	0.347053	0.830733
PFKFB3	PFKFB3	5209	IPFK2|PFK2	6-phosphofructo-2-kinase/fructose-2_6-biphosphatase 3	8.51772	6.42853	6.12309	4.86954	6.72888	5.32766	6.9981	5.71699	80.9419	-0.381988	0.538074	0.861393
PFKP	PFKP	5214	ATP-PFK|PFK-C|PFK-P|PFKF	phosphofructokinase_ platelet	5.81728	5.481	6.7836	5.65239	7.98146	4.75493	6.9981	7.03892	79.5318	1.47104	0.176265	0.830733
PGF	PGF	5228	D12S1900|PGFL|PLGF|PlGF-2|SHGC-10760	placental growth factor	4.81728	5.37408	4.49082	3.92516	3.59643	3.84347	5.41313	3.04143	19.8728	-0.50696	0.503245	0.861393
PGK1	PGK1	5230	HEL-S-68p|MIG10|PGKA	phosphoglycerate kinase 1	4.81728	7.97742	9.21328	8.175	8.62221	9.05013	8.30066	8.52435	271.544	2.26345	0.329059	0.830733
PHB	PHB	5245	HEL-215|HEL-S-54e|PHB1	prohibitin	5.81728	4.67364	5.07578	3.93723	4.56132	4.28404	5.67617	3.51536	25.8592	0.400538	0.507186	0.861393
PIK3CA	PIK3CA	5290	CLOVE|CWS5|MCAP|MCM|MCMTC|PI3K|p110-alpha	phosphatidylinositol-4_5-bisphosphate 3-kinase_ catalytic subunit alpha	4.81728	5.37408	6.33882	5.03597	5.69365	5.37001	6.0912	5.54393	46.3057	0.36995	0.639314	0.88632
PIK3CB	PIK3CB	5291	P110BETA|PI3K|PI3KBETA|PIK3C1	phosphatidylinositol-4_5-bisphosphate 3-kinase_ catalytic subunit beta	4.81728	4.99557	5.81275	5.86639	5.46964	5.37596	5.41313	5.70439	43.168	0.220688	0.824119	0.962551
PIK3CD	PIK3CD	5293	APDS|IMD14|P110DELTA|PI3K|p110D	phosphatidylinositol-4_5-bisphosphate 3-kinase_ catalytic subunit delta	4.81728	5.37408	5.16889	5.1178	3.72888	3.06586	5.67617	3.75415	24.0487	-0.103157	0.935474	0.986676
PIK3R1	PIK3R1	5295	AGM7|GRB1|IMD36|p85|p85-ALPHA	phosphoinositide-3-kinase_ regulatory subunit 1 (alpha)	5.81728	5.481	5.69245	6.44397	5.31805	7.92079	6.9981	5.55098	71.1518	1.39102	0.189375	0.830733
PIK3R2	PIK3R2	5296	MPPH|MPPH1|P85B|p85|p85-BETA	phosphoinositide-3-kinase_ regulatory subunit 2 (beta)	8.13921	5.99557	6.25635	6.34775	5.3472	6.40825	7.61477	5.20242	85.2685	-0.0268833	0.958855	0.988072
PIK3R3	PIK3R3	8503	p55|p55-GAMMA|p55PIK	phosphoinositide-3-kinase_ regulatory subunit 3 (gamma)	8.62463	6.37408	6.81275	6.96403	5.52534	7.48732	7.73506	5.53684	117.989	-0.265189	0.654674	0.892083
PIK3R4	PIK3R4	30849	VPS15|p150	phosphoinositide-3-kinase_ regulatory subunit 4	6.81728	3.99557	5.81275	5.49795	4.99402	4.95099	4.67617	5.21135	37.9101	0.788497	0.695738	0.909097
PIK3R5	PIK3R5	23533	F730038I15Rik|FOAP-2|P101-PI3K|p101	phosphoinositide-3-kinase_ regulatory subunit 5	6.81728	5.58053	5.07578	5.48567	3.48095	5.095	5.41313	4.24654	35.4905	-0.592122	0.519555	0.861393
PKM	PKM	5315	CTHBP|HEL-S-30|OIP3|PK3|PKM2|TCB|THBP1	pyruvate kinase_ muscle	6.40224	9.75046	10.8378	8.61201	8.81037	9.58557	9.1356	9.9669	563.244	2.05706	0.439669	0.839259
PLA2G4A	PLA2G4A	5321	PLA2G4|cPLA2|cPLA2-alpha	phospholipase A2_ group IVA (cytosolic_ calcium-dependent)	6.81728	2.67364	4.33882	2.1178	2.06591	1.77308	5.67617	3.42609	12.2194	1.09954	0.170226	0.830733
PLAU	PLAU	5328	ATF|BDPLT5|QPD|UPA|URK|u-PA	plasminogen activator_ urokinase	7.62463	7.3175	8.41682	6.15962	5.61709	7.68716	7.41313	6.24219	133.414	-0.360139	0.596751	0.873549
PLCB3	PLCB3	5331	-	phospholipase C_ beta 3 (phosphatidylinositol-specific)	6.40224	6.37408	5.86933	6.62839	5.6205	6.65572	5.67617	5.54393	68.4176	-0.0477531	0.960854	0.988763
PLCG2	PLCG2	5336	APLAID|FCAS3|PLC-IV|PLC-gamma-2	phospholipase C_ gamma 2 (phosphatidylinositol-specific)	8.81728	5.99557	6.81275	6.11515	4.39583	4.29664	6.79164	5.8545	70.2741	-1.61871	0.0456325	0.830733
PLEK2	PLEK2	26499	-	pleckstrin 2	8.72417	5.37408	4.97625	1.6153	2.02527	2.20604	6.9981	3.80224	22.0878	-1.54507	0.282559	0.830733
PLK1	PLK1	5347	PLK|STPK13	polo-like kinase 1	6.40224	5.25861	5.41682	6.64689	7.17792	5.25205	5.0912	7.58747	68.7911	1.26534	0.357272	0.830733
PMAIP1	PMAIP1	5366	APR|NOXA	phorbol-12-myristate-13-acetate-induced protein 1	4.81728	5.37408	4.16889	2.58493	5.79987	2.03611	5.67617	5.44136	22.4297	1.48794	0.170095	0.830733
PNOC	PNOC	5368	N/OFQ|OFQ|PPNOC|ppN/OFQ	prepronociceptin	6.81728	2.67364	4.49082	3.22017	-0.519049	0.773076	5.67617	1.04143	8.12119	-0.392317	0.733668	0.930669
POLE	POLE	5426	CRCS12|FILS|POLE1	polymerase (DNA directed)_ epsilon_ catalytic subunit	6.81728	6.37408	6.12309	6.30414	5.36359	6.01339	5.67617	6.01106	67.9004	0.693984	0.683262	0.901494
POU5F1	POU5F1	5460	OCT3|OCT4|OTF-3|OTF3|OTF4|Oct-3|Oct-4	POU class 5 homeobox 1	8.27671	6.13308	5.92378	1.8377	2.62391	2.20604	7.67617	3.04143	26.261	-0.537134	0.689454	0.904614
PPAN	PPAN	56342	BXDC3|SSF|SSF-1|SSF1|SSF2	peter pan homolog (Drosophila)	8.72417	6.42853	6.16889	6.47536	5.61366	5.74117	6.67617	5.22023	83.3449	-1.27718	0.0368136	0.830733
PRDX1	PRDX1	5052	MSP23|NKEF-A|NKEFA|PAG|PAGA|PAGB|PRX1|PRXI|TDPX2	peroxiredoxin 1	4.81728	8.72893	9.72731	9.45818	8.72333	10.385	8.9981	9.88098	458.218	2.50695	0.329828	0.830733
PRDX2	PRDX2	7001	HEL-S-2a|NKEF-B|NKEFB|PRP|PRX2|PRXII|PTX1|TDPX1|TPX1|TSA	peroxiredoxin 2	5.81728	8.303	7.73875	9.21242	9.46845	9.49486	8.70591	8.99498	353.841	2.85452	0.228313	0.830733
PRDX6	PRDX6	9588	1-Cys|AOP2|HEL-S-128m|NSGPx|PRX|aiPLA2|p29	peroxiredoxin 6	6.40224	7.25861	8.00178	8.66015	8.44529	7.73771	8.48352	8.43184	243.477	2.30416	0.294822	0.830733
PRF1	PRF1	5551	FLH2|HPLH2|P1|PFN1|PFP	perforin 1 (pore forming protein)	6.40224	3.99557	4.16889	5.75485	1.75397	1.2585	3.0912	2.26382	12.0097	-2.65535	0.0640264	0.830733
PRIM1	PRIM1	5557	p49	primase_ DNA_ polypeptide 1 (49kDa)	6.81728	4.99557	4.62832	5.21025	5.56487	3.58043	6.26113	4.75415	37.4398	0.83399	0.301257	0.830733
PRKACA	PRKACA	5566	PKACA|PPNAD4	protein kinase_ cAMP-dependent_ catalytic_ alpha	6.81728	6.67364	7.45429	7.11116	7.75241	7.51589	7.94919	7.10752	157.332	2.28758	0.241286	0.830733
PRKCA	PRKCA	5578	AAG6|PKC-alpha|PKCA|PRKACA	protein kinase C_ alpha	4.81728	6.481	5.41682	3.25916	5.73834	2.6606	6.0912	2.62639	24.8702	-0.288125	0.795932	0.953623
PRKCB	PRKCB	5579	PKC-beta|PKCB|PRKCB1|PRKCB2	protein kinase C_ beta	4.81728	4.481	3.75385	4.88832	1.89599	2.49554	4.0912	2.77839	12.5551	-1.37851	0.232492	0.830733
PSMB10	PSMB10	5699	LMP10|MECL1|beta2i	proteasome subunit beta 10	6.81728	6.3175	6.41682	6.19525	4.70334	4.39366	6.67617	4.42609	53.5667	0.252108	0.878743	0.984565
PSMB7	PSMB7	5695	Z	proteasome subunit beta 7	7.13921	6.84357	6.97625	7.41836	7.18023	7.88473	7.17867	6.97479	146.98	1.96495	0.308638	0.830733
PSMB9	PSMB9	5698	LMP2|PSMB6i|RING12|beta1i	proteasome subunit beta 9	8.90474	6.8831	6.69245	6.52219	5.02527	3.64097	7.61477	4.83729	76.9099	-1.4166	0.117385	0.830733
PTCH1	PTCH1	5727	BCNS|HPE7|NBCCS|PTC|PTC1|PTCH|PTCH11	patched 1	4.81728	4.25861	3.49082	4.20027	5.67407	2.8087	4.67617	3.51536	18.1281	1.48543	0.247201	0.830733
PTCH2	PTCH2	8643	PTC2	patched 2	6.81728	2.67364	4.33882	3.5695	4.04574	3.15159	5.41313	5.24654	21.2152	1.63005	0.111419	0.830733
PTEN	PTEN	5728	10q23del|BZS|CWS1|DEC|GLM2|MHAM|MMAC1|PTEN1|TEP1	phosphatase and tensin homolog	8.13921	5.84357	5.56121	5.6597	5.41955	5.17907	6.9981	3.19343	53.7886	-0.551796	0.42029	0.833614
PTGER2	PTGER2	5732	EP2	prostaglandin E receptor 2 (subtype EP2)_ 53kDa	5.81728	3.99557	5.07578	2.8377	0.983451	2.45115	5.41313	1.45647	11.3437	-1.29956	0.194825	0.830733
PTGER3	PTGER3	5733	EP3|EP3-I|EP3-II|EP3-III|EP3-IV|EP3-VI|EP3e|PGE2-R	prostaglandin E receptor 3 (subtype EP3)	6.81728	2.67364	4.49082	2.8117	2.87327	3.82619	5.41313	3.42609	16.4671	0.881356	0.234314	0.830733
PTGER4	PTGER4	5734	EP4|EP4R	prostaglandin E receptor 4 (subtype EP4)	8.51772	7.19721	5.62832	5.74802	3.06591	4.42843	6.79164	4.58575	53.6451	-1.82059	0.0441898	0.830733
PTGS2	PTGS2	5743	COX-2|COX2|GRIPGHS|PGG/HS|PGHS-2|PHS-2|hCox-2	prostaglandin-endoperoxide synthase 2 (prostaglandin G/H synthase and cyclooxygenase)	8.62463	5.58053	5.86933	2.75826	1.85018	2.30913	6.89856	1.95897	22.3345	-1.83838	0.194984	0.830733
PTPN6	PTPN6	5777	HCP|HCPH|HPTP1C|PTP-1C|SH-PTP1|SHP-1|SHP-1L|SHP1	protein tyrosine phosphatase_ non-receptor type 6	6.40224	6.3175	6.45429	7.30647	5.00451	6.75949	6.67617	5.86586	81.4767	-0.200197	0.833689	0.967652
PTPRC	PTPRC	5788	B220|CD45|CD45R|GP180|L-CA|LCA|LY5|T200	protein tyrosine phosphatase_ receptor type_ C	7.13921	6.62784	6.21328	5.99034	3.5542	4.0805	7.0912	4.47142	50.0744	-0.511646	0.626216	0.881902
RAC3	RAC3	5881	-	ras-related C3 botulinum toxin substrate 3 (rho family_ small GTP binding protein Rac3)	8.13921	4.67364	6.72348	3.73078	6.31173	4.67997	6.55064	6.55098	60.5499	0.017278	0.982803	0.989966
RAD51	RAD51	5888	BRCC5|FANCR|HRAD51|HsRad51|HsT16930|MRMV2|RAD51A|RECA	RAD51 recombinase	8.62463	5.58053	5.97625	3.93723	3.53984	3.89409	7.33913	5.32272	46.1035	-0.867476	0.402249	0.833614
RAD51AP1	RAD51AP1	10635	PIR51	RAD51 associated protein 1	7.81728	6.92157	6.12309	5.27827	4.9728	4.61102	6.26113	6.03641	64.1197	-0.809961	0.0761852	0.830733
RAD54B	RAD54B	25788	RDH54	RAD54 homolog B (S. cerevisiae)	6.40224	4.25861	4.33882	5.54209	5.07091	4.58043	4.67617	5.28936	32.4428	0.693022	0.553282	0.861393
RAD54L	RAD54L	8438	HR54|RAD54A|hHR54|hRAD54	RAD54-like (S. cerevisiae)	7.81728	5.13308	5.16889	3.99612	3.9728	3.12357	6.55064	4.39507	32.4395	-0.462106	0.512281	0.861393
RAF1	RAF1	5894	CMD1NN|CRAF|NS5|Raf-1|c-Raf	Raf-1 proto-oncogene_ serine/threonine kinase	8.27671	6.06596	7.91036	6.78856	6.45058	6.90647	7.48352	6.97741	137.897	-0.217591	0.592033	0.873549
RASA1	RASA1	5921	CM-AVM|CMAVM|GAP|PKWS|RASA|RASGAP|p120GAP|p120RASGAP	RAS p21 protein activator (GTPase activating protein) 1	6.40224	6.19721	6.12309	6.23001	5.86465	7.15505	6.41313	5.92679	78.1959	1.6267	0.331596	0.830733
RB1	RB1	5925	OSRC|PPP1R130|RB|p105-Rb|pRb|pp110	retinoblastoma 1	8.62463	5.37408	6.02687	5.83447	5.16277	6.49554	6.41313	5.33094	71.3977	-0.845727	0.238185	0.830733
RB1CC1	RB1CC1	9821	ATG17|CC1|FIP200|PPP1R131	RB1-inducible coiled-coil 1	8.62463	5.481	6.45429	7.54209	7.00451	7.40097	7.17867	6.74495	132.872	-0.0689097	0.902325	0.986676
RBBP5	RBBP5	5929	RBQ3|SWD1	retinoblastoma binding protein 5	6.81728	4.84357	4.49082	5.20027	5.10056	5.57527	5.89856	5.77839	44.1117	1.33121	0.105065	0.830733
RBL1	RBL1	5933	CP107|PRB1|p107	retinoblastoma-like 1	7.13921	5.37408	4.97625	5.37019	4.62391	3.69908	6.26113	6.37533	44.5513	0.818887	0.357238	0.830733
RBX1	RBX1	9978	BA554C12.1|RNF75|ROC1	ring-box 1_ E3 ubiquitin protein ligase	7.81728	8.11659	7.91036	7.66787	8.27915	7.39805	7.84609	8.19456	239.477	0.323053	0.4165	0.833614
REL	REL	5966	C-Rel	v-rel avian reticuloendotheliosis viral oncogene homolog	6.40224	6.37408	6.37834	6.23246	5.78473	7.22429	6.55064	6.43375	85.7799	1.68164	0.327522	0.830733
RELB	RELB	5971	I-REL|IREL|REL-B	v-rel avian reticuloendotheliosis viral oncogene homolog B	4.81728	7.13308	5.25635	5.36573	5.13439	5.54918	6.26113	5.84305	50.9152	-0.140481	0.878717	0.984565
RET	RET	5979	CDHF12|CDHR16|HSCR1|MEN2A|MEN2B|MTC1|PTC|RET-ELE1|RET51	ret proto-oncogene	4.81728	3.67364	3.16889	1.88832	0.217916	6.97275	4.0912	1.04143	9.40827	1.45055	0.439982	0.839259
RFC2	RFC2	5982	RFC40	replication factor C (activator 1) 2_ 40kDa	6.40224	5.58053	6.07578	6.17245	7.48095	5.84775	6.26113	6.558	78.6489	1.17979	0.219234	0.830733
RFC3	RFC3	5983	RFC38	replication factor C (activator 1) 3_ 38kDa	4.81728	4.99557	5.33882	5.59258	7.00843	5.40534	6.26113	5.84305	50.4847	1.47999	0.104869	0.830733
RFC4	RFC4	5984	A1|RFC37	replication factor C (activator 1) 4_ 37kDa	4.81728	6.37408	6.62832	6.43335	7.04319	4.61102	5.0912	6.66592	62.1657	-0.172833	0.941586	0.986676
RICTOR	RICTOR	253260	AVO3|PIA|hAVO3	RPTOR independent companion of MTOR_ complex 2	4.81728	6.13308	6.89681	6.22263	6.52352	5.98253	6.26113	6.29357	70.5864	1.31616	0.441969	0.839259
RIMKLB	RIMKLB	57494	FAM80B|NAAGS|NAAGS-I	ribosomal modification protein rimK-like family member B	4.81728	6.80293	5.33882	4.83124	4.10544	6.15851	6.41313	5.22906	44.0799	0.15014	0.872309	0.981842
RNF111	RNF111	54778	ARK	ring finger protein 111	5.81728	7.1655	6.75385	6.76674	5.90442	7.27292	7.0912	7.04393	105.931	1.61385	0.385788	0.832055
ROCK1	ROCK1	6093	P160ROCK|ROCK-I	Rho-associated_ coiled-coil containing protein kinase 1	6.40224	4.84357	4.75385	5.22017	4.80888	5.39951	5.67617	5.06133	38.605	0.770518	0.317637	0.830733
ROCK2	ROCK2	9475	ROCK-II	Rho-associated_ coiled-coil containing protein kinase 2	5.81728	5.481	6.29817	5.42695	5.68062	5.93496	5.41313	5.67886	52.5774	0.734573	0.674092	0.89879
RPA3	RPA3	6119	REPA3	replication protein A3_ 14kDa	5.81728	6.19721	6.33882	6.96992	5.38784	5.74117	7.0912	5.45647	69.7919	1.04838	0.542105	0.861393
RPTOR	RPTOR	57521	KOG1|Mip1	regulatory associated protein of MTOR_ complex 1	6.40224	6.13308	6.59516	5.08019	5.79686	5.08777	6.0912	6.33094	61.3792	0.185414	0.830815	0.966159
RRAGC	RRAGC	64121	GTR2|RAGC|TIB929	Ras-related GTP binding C	7.81728	6.67364	6.89681	6.25675	5.88751	6.31533	7.67617	6.26382	105.669	0.139403	0.670377	0.89879
RRM2	RRM2	6241	R2|RR2|RR2M	ribonucleotide reductase M2	6.40224	7.34607	7.8271	8.04785	8.079	7.943	6.9981	8.30926	196.594	1.94934	0.360396	0.830733
RUNX1	RUNX1	861	AML1|AML1-EVI-1|AMLCR1|CBF2alpha|CBFA2|EVI-1|PEBP2aB|PEBP2alpha	runt-related transcription factor 1	4.81728	7.97742	9.0937	7.94697	8.77404	9.47213	8.33913	8.4963	277.169	2.49856	0.281344	0.830733
RUVBL1	RUVBL1	8607	ECP54|INO80H|NMP238|PONTIN|Pontin52|RVB1|TIH1|TIP49|TIP49A	RuvB-like AAA ATPase 1	8.9872	7.0312	7.14617	6.33868	6.31595	5.35804	8.55064	6.60621	131.759	-0.30411	0.671262	0.89879
S100A12	S100A12	6283	CAAF1|CAGC|CGRP|ENRAGE|MRP-6|MRP6|p6	S100 calcium binding protein A12	7.40224	3.67364	3.16889	1.98454	0.217916	2.6606	3.0912	-0.543533	6.52934	-1.41504	0.239786	0.830733
SAV1	SAV1	60485	SAV|WW45|WWP4	salvador family WW domain containing protein 1	6.81728	6.13308	7.73875	6.38789	6.41955	6.52796	7.0912	6.43375	103.514	0.0780025	0.934367	0.986676
SDC1	SDC1	6382	CD138|SDC|SYND1|syndecan	syndecan 1	7.13921	7.1655	8.65271	8.10247	8.61922	9.31068	8.64579	9.42849	333.839	3.03215	0.183774	0.830733
SELL	SELL	6402	CD62L|LAM1|LECAM1|LEU8|LNHR|LSEL|LYAM1|PLNHR|TQ1	selectin L	5.81728	3.99557	3.75385	5.74115	3.38784	2.943	6.0912	4.11943	22.3339	0.16711	0.893232	0.986676
SERPINB5	SERPINB5	5268	PI5|maspin	serpin peptidase inhibitor_ clade B (ovalbumin)_ member 5	7.40224	4.481	5.41682	6.29947	7.19176	1.77308	7.41313	7.98394	63.7865	1.98388	0.0921338	0.830733
SERPINE1	SERPINE1	5054	PAI|PAI-1|PAI1|PLANH1	serpin peptidase inhibitor_ clade E (nexin_ plasminogen activator inhibitor type 1)_ member 1	7.40224	5.58053	6.25635	4.26875	4.5542	8.51858	6.67617	4.22906	61.2117	1.80277	0.0961534	0.830733
SETD2	SETD2	29072	HBP231|HIF-1|HIP-1|HSPC069|HYPB|KMT3A|SET2|p231HBP	SET domain containing 2	4.81728	5.37408	5.07578	5.76505	5.43126	6.31843	5.67617	5.44136	44.8621	0.761488	0.392542	0.832055
SF3B1	SF3B1	23451	Hsh155|MDS|PRP10|PRPF10|SAP155|SF3b155	splicing factor 3b_ subunit 1_ 155kDa	4.81728	7.69601	9.27218	7.73424	8.2117	8.40316	7.48352	8.29672	213.687	1.8676	0.408485	0.833614
SFN	SFN	2810	YWHAS	stratifin	7.13921	4.67364	5.97625	6.74287	6.91836	6.47629	7.55064	8.26918	105.296	1.96369	0.0850924	0.830733
SH2D1A	SH2D1A	4068	DSHP|EBVS|IMD5|LYP|MTCP1|SAP|SAP/SH2D1A|XLP|XLPD|XLPD1	SH2 domain containing 1A	6.40224	4.25861	4.16889	5.35677	2.87327	1.97471	4.0912	3.57194	16.997	-1.20436	0.282661	0.830733
SH3PXD2A	SH3PXD2A	9644	FISH|SH3MD1|TKS5	SH3 and PX domains 2A	6.40224	6.58053	6.12309	5.95812	5.16745	5.49554	6.26113	4.65286	56.8907	0.591215	0.71207	0.922505
SHH	SHH	6469	HHG1|HLP3|HPE3|MCOPCB5|SMMCI|TPT|TPTPS	sonic hedgehog	8.62463	5.37408	4.97625	-0.384697	-0.296657	0.621073	5.41313	0.193432	8.36958	-5.37752	0.00658458	0.830733
SIGLEC5	SIGLEC5	8778	CD170|CD33L2|OB-BP2|OBBP2|SIGLEC-5	sialic acid binding Ig-like lectin 5	7.13921	3.99557	4.62832	2.03034	0.596428	1.03611	6.0912	1.04143	9.98545	0.765535	0.551265	0.861393
SIGLEC9	SIGLEC9	27180	CD329|CDw329|FOAP-9|OBBP-LIKE|siglec-9	sialic acid binding Ig-like lectin 9	6.40224	3.67364	3.97625	3.1178	1.06591	3.095	4.67617	2.62639	11.952	0.280108	0.736172	0.930669
SIN3A	SIN3A	25942	-	SIN3 transcription regulator family member A	7.9872	6.62784	7.57828	6.55782	5.81783	6.71089	7.33913	6.02125	113.774	-0.402547	0.254324	0.830733
SIRPA	SIRPA	140885	BIT|CD172A|MFR|MYD-1|P84|PTPNS1|SHPS1|SIRP	signal-regulatory protein alpha	5.81728	5.84357	6.07578	5.62653	5.24028	5.6606	6.26113	5.23783	52.7235	1.12612	0.454791	0.841702
SKA1	SKA1	220134	C18orf24	spindle and kinetochore associated complex subunit 1	7.40224	4.99557	3.97625	4.23001	5.41955	3.03611	3.0912	4.88273	24.7475	0.463947	0.605848	0.873549
SKIL	SKIL	6498	SNO|SnoA|SnoI|SnoN	SKI-like proto-oncogene	6.40224	8.2128	7.97625	7.10849	6.88467	9.29742	8.58306	8.06009	225.288	2.37802	0.280602	0.830733
SKP2	SKP2	6502	FBL1|FBXL1|FLB1|p45	S-phase kinase-associated protein 2_ E3 ubiquitin protein ligase	7.40224	7.28835	7.14617	6.76674	7.00712	5.03611	7.41313	6.58918	113.861	-0.0367118	0.953764	0.987561
SLC1A5	SLC1A5	6510	AAAT|ASCT2|ATBO|M7V1|M7VS1|R16|RDRC	solute carrier family 1 (neutral amino acid transporter)_ member 5	7.40224	7.25861	7.19126	7.28537	7.10909	8.15332	7.33913	8.16957	179.591	0.898042	0.169598	0.830733
SLC2A1	SLC2A1	6513	CSE|DYT17|DYT18|DYT9|EIG12|GLUT|GLUT-1|GLUT1|GLUT1DS|HTLVR|PED	solute carrier family 2 (facilitated glucose transporter)_ member 1	5.81728	3.25861	4.49082	1.48977	1.94038	1.91058	6.0912	2.72949	11.0503	1.58496	0.167253	0.830733
SLC7A5	SLC7A5	8140	4F2LC|CD98|D16S469E|E16|LAT1|MPE16|hLAT1	solute carrier family 7 (amino acid transporter light chain_ L system)_ member 5	7.40224	7.50653	7.47267	6.47949	4.94584	6.60343	6.9981	9.37035	136.934	0.991798	0.329607	0.830733
SLIT2	SLIT2	9353	SLIL3|Slit-2	slit guidance ligand 2	8.27671	5.67364	5.62832	4.54604	4.38784	4.81747	5.89856	3.72949	41.3484	-1.62496	0.035649	0.830733
SLPI	SLPI	6590	ALK1|ALP|BLPI|HUSI|HUSI-I|MPI|WAP4|WFDC4	secretory leukocyte peptidase inhibitor	6.40224	3.25861	5.69245	4.27827	3.18139	7.71793	6.67617	7.33707	47.4395	2.86368	0.0479378	0.830733
SMAD7	SMAD7	4092	CRCS3|MADH7|MADH8	SMAD family member 7	6.40224	6.19721	6.41682	5.51818	6.58249	6.32151	6.79164	6.14763	78.6413	1.90276	0.24492	0.830733
SMC3	SMC3	9126	BAM|BMH|CDLS3|CSPG6|HCAP|SMC3L1	structural maintenance of chromosomes 3	7.81728	6.25861	5.49082	6.4587	5.50701	5.50643	7.48352	5.25521	74.6566	0.0602351	0.902797	0.986676
SMO	SMO	6608	FZD11|Gx|SMOH	smoothened_ frizzled class receptor	4.81728	6.19721	6.84132	5.63767	6.41955	5.15159	6.55064	5.70439	60.3363	1.20729	0.467072	0.842916
SMS	SMS	6611	MRSR|SPMSY|SRS|SpS	spermine synthase	5.81728	7.34607	7.84132	7.51617	8.19348	9.1031	8.0912	7.86727	211.13	2.63429	0.214973	0.830733
SNAI1	SNAI1	6615	SLUGH2|SNA|SNAH|SNAIL|SNAIL1|dJ710H13.1	snail family zinc finger 1	9.94656	6.62784	6.41682	3.48977	3.18139	4.55967	7.84609	4.70439	57.543	-2.01154	0.152251	0.830733
SNAI2	SNAI2	6591	SLUG|SLUGH1|SNAIL2|WS2D	snail family zinc finger 2	4.81728	4.25861	6.62832	5.25916	6.98875	5.43983	6.9981	6.51536	58.2092	1.41779	0.194566	0.830733
SOCS1	SOCS1	8651	CIS1|CISH1|JAB|SOCS-1|SSI-1|SSI1|TIP3	suppressor of cytokine signaling 1	5.81728	5.67364	4.86933	5.8215	4.21792	5.73192	5.0912	3.72949	34.7523	-0.385025	0.734729	0.930669
SOCS3	SOCS3	9021	ATOD4|CIS3|Cish3|SOCS-3|SSI-3|SSI3	suppressor of cytokine signaling 3	5.81728	4.99557	6.49082	6.08562	5.72254	7.84024	5.67617	5.49356	64.679	1.04333	0.36912	0.830733
SOD1	SOD1	6647	ALS|ALS1|HEL-S-44|IPOA|SOD|hSod1|homodimer	superoxide dismutase 1_ soluble	8.81728	7.19721	8.12309	7.15705	8.25848	7.49144	7.73506	7.58403	222.16	0.0170332	0.957844	0.988072
SORD	SORD	6652	HEL-S-95n|SORD1	sorbitol dehydrogenase	8.9872	6.19721	6.12309	6.27113	4.99928	7.51724	6.79164	5.89387	96.8434	-0.66866	0.390048	0.832055
SOS1	SOS1	6654	GF1|GGF1|GINGF|HGF|NS4	son of sevenless homolog 1 (Drosophila)	5.81728	4.84357	6.33882	5.6153	3.70334	5.33989	6.79164	5.77237	46.1346	0.417727	0.658561	0.894104
SOX2	SOX2	6657	ANOP3|MCOPS3	SRY (sex determining region Y)-box 2	8.13921	5.13308	3.16889	6.60588	1.06591	-0.226924	5.0912	-1.1285	11.1664	-4.30924	0.0375818	0.830733
SOX7	SOX7	83595	-	SRY (sex determining region Y)-box 7	8.90474	5.481	5.69245	3.96108	2.65088	4.16539	7.17867	3.00079	35.0022	-1.58496	0.211949	0.830733
SPDEF	SPDEF	25803	PDEF|bA375E1.3	SAM pointed domain containing ETS transcription factor	4.81728	1.67364	2.16889	4.54604	-0.519049	6.24231	4.0912	-0.128496	7.2676	0.428843	0.831104	0.966159
SPHK2	SPHK2	56848	SK 2|SK-2|SPK 2|SPK-2	sphingosine kinase 2	8.62463	6.53162	5.41682	4.36126	3.79081	3.40534	7.48352	4.08096	44.0744	-1.05118	0.338438	0.830733
SPIB	SPIB	6689	SPI-B	Spi-B transcription factor (Spi-1/PU.1 related)	4.81728	8.40156	3.16889	3.33412	2.75397	-0.548852	4.67617	4.8715	15.288	-1.02405	0.670676	0.89879
SPINT1	SPINT1	6692	HAI|HAI1|MANSC2	serine peptidase inhibitor_ Kunitz type 1	7.13921	5.92157	7.29817	5.76505	5.24914	8.31533	7.26113	7.82861	115.142	1.49872	0.183731	0.830733
SPINT2	SPINT2	10653	DIAR3|HAI-2|HAI2|Kop|PB	serine peptidase inhibitor_ Kunitz type_ 2	6.40224	8.40156	9.61597	9.36601	8.36919	11.1761	8.9981	9.41743	500.881	1.11251	0.381224	0.830733
SQLE	SQLE	6713	-	squalene epoxidase	8.40224	6.25861	7.14617	7.13756	6.10544	6.55444	7.67617	7.85877	141.281	0.106915	0.811641	0.95699
SQSTM1	SQSTM1	8878	A170|FTDALS3|OSIL|PDB3|ZIP3|p60|p62|p62B	sequestosome 1	7.40224	8.1655	8.25635	8.35001	7.32015	9.7829	8.97385	8.44326	323.312	1.02278	0.226601	0.830733
SRC	SRC	6714	ASV|SRC1|c-SRC|p60-Src	SRC proto-oncogene_ non-receptor tyrosine kinase	6.40224	3.25861	4.49082	3.68855	1.70334	2.30913	5.67617	2.95897	14.0352	0.222392	0.786088	0.948055
SREBF1	SREBF1	6720	SREBP-1c|SREBP1|bHLHd1	sterol regulatory element binding transcription factor 1	4.81728	6.62784	6.92378	7.37575	6.59643	9.69967	7.0912	6.73878	126.574	1.64753	0.187348	0.830733
SRM	SRM	6723	PAPT|SPDSY|SPS1|SRML1	spermidine synthase	7.81728	7.37408	7.56121	8.31921	7.42834	6.80429	7.67617	7.48805	188.521	-0.201234	0.619282	0.87861
SSRP1	SSRP1	6749	FACT|FACT80|T160	structure specific recognition protein 1	6.81728	7.3175	6.84132	6.66878	7.62476	7.06402	7.48352	7.70281	146.018	2.24682	0.239976	0.830733
STAG2	STAG2	10735	SA-2|SA2|SCC3B|bA517O1.1	stromal antigen 2	6.40224	7.0312	7.07578	7.39885	7.18255	6.70381	7.17867	7.57886	134.27	1.74564	0.365342	0.830733
STAT1	STAT1	6772	CANDF7|IMD31A|IMD31B|IMD31C|ISGF-3|STAT91	signal transducer and activator of transcription 1_ 91kDa	8.51772	8.18144	9.07578	8.23735	7.62391	7.03986	8.73506	7.40872	274.846	-0.576789	0.183182	0.830733
STAT3	STAT3	6774	ADMIO|APRF|HIES	signal transducer and activator of transcription 3 (acute-phase response factor)	5.81728	7.80293	7.91036	7.77096	8.12841	8.51319	8.41313	7.58059	214.095	2.2853	0.286294	0.830733
STAT4	STAT4	6775	SLEB11	signal transducer and activator of transcription 4	7.13921	5.13308	4.33882	4.27827	2.32225	2.53861	6.26113	2.8715	20.5399	0.16665	0.859029	0.978446
STING1	STING1	NA	NA	NA	6.40224	6.13308	6.29817	6.21769	5.46964	6.00574	5.41313	5.11943	58.9897	0.139927	0.938688	0.986676
STIP1	STIP1	10963	HEL-S-94n|HOP|IEF-SSP-3521|P60|STI1|STI1L	stress-induced phosphoprotein 1	6.81728	7.71804	8.09963	8.11182	7.89669	7.97667	7.61477	8.15111	222.591	1.88857	0.379634	0.830733
STK3	STK3	6788	KRS1|MST2	serine/threonine kinase 3	7.9872	5.37408	5.97625	4.8117	4.8208	5.60089	7.33913	4.76632	57.0655	0.119189	0.848865	0.976129
STK4	STK4	6789	KRS2|MST1|TIIAC|YSK3	serine/threonine kinase 4	4.81728	6.42853	6.07578	6.38789	4.98875	5.68477	5.89856	5.71699	53.8106	0.60354	0.712958	0.922505
SUPT16H	SUPT16H	11198	CDC68|FACTP140|SPT16|SPT16/CDC68	suppressor of Ty 16 homolog (S. cerevisiae)	5.81728	3.67364	5.69245	5.51416	4.89034	5.41693	5.67617	4.72949	36.1596	0.338416	0.753272	0.9381
SYK	SYK	6850	p72-Syk	spleen tyrosine kinase	7.13921	5.58053	4.97625	5.23979	4.64418	3.92688	6.26113	4.45647	38.8019	0.121562	0.867936	0.979699
TAP1	TAP1	6890	ABC17|ABCB2|APT1|D6S114E|PSF-1|PSF1|RING4|TAP1*0102N|TAP1N	transporter 1_ ATP-binding cassette_ sub-family B (MDR/TAP)	7.81728	7.481	7.25635	7.24466	5.93491	4.29664	7.9981	6.07118	108.572	-0.544773	0.411902	0.833614
TAP2	TAP2	6891	ABC18|ABCB3|APT2|D6S217E|PSF-2|PSF2|RING11	transporter 2_ ATP-binding cassette_ sub-family B (MDR/TAP)	7.62463	6.8831	6.45429	6.95515	5.6205	4.45115	7.17867	6.40678	87.2319	-0.423305	0.409885	0.833614
TAPBP	TAPBP	6892	NGS17|TAPA|TPN|TPSN	TAP binding protein (tapasin)	4.81728	8.51913	8.61183	8.37796	7.80363	7.59453	8.26113	8.28513	220.377	1.58445	0.483658	0.848774
TAZ	TAZ	6901	BTHS|CMD3A|EFE|EFE2|G4.5|LVNCX|Taz1	tafazzin	6.81728	6.06596	5.92378	6.57916	5.80288	5.86478	6.26113	5.93759	71.3366	1.23189	0.447229	0.839259
TBRG4	TBRG4	9238	CPR2|FASTKD4	transforming growth factor beta regulator 4	4.81728	5.58053	4.97625	6.50202	5.31384	5.943	5.41313	6.58918	49.9324	0.473931	0.670405	0.89879
TBX21	TBX21	30009	T-PET|T-bet|TBET|TBLYM	T-box 21	7.9872	4.67364	4.62832	3.70277	1.59643	0.621073	6.0912	1.77839	14.7729	-1.91983	0.128619	0.830733
TCF7	TCF7	6932	TCF-1	transcription factor 7 (T-cell specific_ HMG-box)	6.40224	4.481	2.75385	2.52219	1.59643	1.62107	3.0912	2.04143	8.36101	-0.447459	0.545737	0.861393
TCL1A	TCL1A	8115	TCL1	T-cell leukemia/lymphoma 1A	4.81728	4.25861	2.16889	3.31574	0.35542	-0.548852	4.0912	1.57194	5.67169	-1.76553	0.106254	0.830733
TCOF1	TCOF1	6949	MFD1|TCS|TCS1|treacle	Treacher Collins-Franceschetti syndrome 1	8.51772	6.42853	6.16889	5.18009	4.76635	5.06586	7.33913	5.558	69.9413	-0.729452	0.30112	0.830733
TEAD1	TEAD1	7003	AA|NTEF-1|REF1|TCF-13|TCF13|TEAD-1|TEF-1	TEA domain family member 1 (SV40 transcriptional enhancer factor)	8.40224	6.19721	6.21328	5.44819	6.31384	5.15851	7.17867	5.75415	80.6309	-0.357295	0.512143	0.861393
TEAD2	TEAD2	8463	ETF|TEAD-2|TEF-4|TEF4	TEA domain family member 2	4.81728	5.58053	5.81275	6.37242	6.50147	6.13063	5.89856	6.79037	63.4699	0.853958	0.363365	0.830733
TEK	TEK	7010	CD202B|TIE-2|TIE2|VMCM|VMCM1	TEK tyrosine kinase_ endothelial	5.81728	3.25861	2.16889	2.58493	1.70334	3.38188	5.0912	1.8715	9.41333	0.917538	0.328226	0.830733
TERF2IP	TERF2IP	54386	DRIP5|RAP1	telomeric repeat binding factor 2_ interacting protein	7.9872	5.67364	5.69245	5.57337	4.9128	5.15159	6.26113	4.558	52.9396	-0.842899	0.0531579	0.830733
TERT	TERT	7015	CMM9|DKCA2|DKCB4|EST2|PFBMFT1|TCS1|TP2|TRT|hEST2|hTRT	telomerase reverse transcriptase	6.40224	4.25861	1.16889	1.6742	1.98345	-1.54885	5.0912	-0.543533	4.9615	-0.514573	0.504528	0.861393
TET2	TET2	54790	KIAA1546|MDS	tet methylcytosine dioxygenase 2	6.40224	6.3175	6.02687	5.87583	4.58249	7.20436	6.89856	5.83151	70.6403	0.791053	0.399141	0.833614
TFDP1	TFDP1	7027	DP1|DRTF1|Dp-1	transcription factor Dp-1	6.40224	8.55629	6.33882	6.8774	7.98875	6.52261	6.41313	6.97741	128.853	-0.0838541	0.94052	0.986676
TGFB1	TGFB1	7040	CED|DPD1|LAP|TGFB|TGFbeta	transforming growth factor_ beta 1	8.62463	7.65092	7.19126	6.92819	5.70656	7.37001	7.84609	5.89387	142.167	-0.549595	0.267205	0.830733
TGFB2	TGFB2	7042	LDS4|TGF-beta2	transforming growth factor_ beta 2	8.81728	6.3175	6.41682	1.73078	6.95668	4.67997	6.67617	3.15691	48.3021	-1	0.390645	0.832055
TGFB3	TGFB3	7043	ARVD|ARVD1|RNHF|TGF-beta3	transforming growth factor_ beta 3	7.40224	5.13308	5.33882	4.70277	4.52534	5.8816	5.67617	4.83729	43.326	0.403356	0.370884	0.830733
TGFBR2	TGFBR2	7048	AAT3|FAA3|LDS1B|LDS2|LDS2B|MFS2|RIIC|TAAD2|TGFR-2|TGFbeta-RII	transforming growth factor_ beta receptor II (70/80kDa)	6.40224	5.13308	5.92378	5.53019	4.27969	5.00574	6.55064	4.24654	41.7582	0.0838316	0.919296	0.986676
TGM2	TGM2	7052	G-ALPHA-h|GNAH|HEL-S-45|TG2|TGC	transglutaminase 2	7.13921	6.42853	6.12309	5.52219	2.89599	4.64097	5.89856	4.48621	41.9862	-0.307303	0.847054	0.975555
THBS1	THBS1	7057	THBS|THBS-1|TSP|TSP-1|TSP1	thrombospondin 1	5.81728	8.44183	11.8891	7.81334	9.52989	9.63757	9.11357	9.05204	481.647	-0.750097	0.593927	0.873549
THBS2	THBS2	7058	TSP2	thrombospondin 2	5.81728	8.40156	9.75761	7.24709	8.1332	8.96832	8.1356	7.53506	255.905	-0.138806	0.905275	0.986676
TIGIT	TIGIT	201633	VSIG9|VSTM3|WUCAM	T cell immunoreceptor with Ig and ITIM domains	6.40224	3.99557	5.56121	4.6002	2.82673	1.45115	7.17867	3.00079	20.7792	0.988318	0.479747	0.847523
TIMELESS	TIMELESS	8914	TIM|TIM1|hTIM	timeless circadian clock	6.81728	5.25861	5.69245	6.25434	7.28293	5.5907	6.26113	6.35128	72.9376	1.19137	0.216032	0.830733
TJP1	TJP1	7082	ZO-1	tight junction protein 1	7.62463	5.481	7.07578	5.91298	6.72412	7.2872	6.9981	6.39507	103.061	0.739183	0.116399	0.830733
TLR3	TLR3	7098	CD283|IIAE2	toll-like receptor 3	4.81728	4.67364	3.97625	3.73078	2.35542	3.23251	3.0912	3.08096	12.2929	-0.383329	0.623335	0.880002
TLR4	TLR4	7099	ARMD10|CD284|TLR-4|TOLL	toll-like receptor 4	5.81728	6.3175	5.16889	6.1622	4.58249	4.99031	5.89856	4.69168	43.8229	0.457842	0.762532	0.942317
TMPRSS2	TMPRSS2	7113	PP9284|PRSS10	transmembrane protease_ serine 2	8.72417	5.99557	5.49082	4.16989	4.42737	6.20937	6.67617	5.06133	57.454	-0.954196	0.281188	0.830733
TNF	TNF	7124	DIF|TNF-alpha|TNFA|TNFSF2	tumor necrosis factor	8.27671	6.37408	5.33882	4.76505	3.10544	4.45115	6.9981	3.57194	41.0742	-1.13343	0.225737	0.830733
TNFAIP3	TNFAIP3	7128	A20|OTUD7C|TNFA1P2	tumor necrosis factor_ alpha-induced protein 3	7.13921	5.99557	5.25635	4.85689	3.63746	4.27133	6.67617	4.81402	40.2488	0.214594	0.803894	0.955426
TNFRSF17	TNFRSF17	608	BCM|BCMA|CD269|TNFRSF13A	tumor necrosis factor receptor superfamily_ member 17	5.81728	1.67364	4.75385	4.5539	0.217916	2.2585	4.0912	0.456467	7.87809	-2.51457	0.0636813	0.830733
TNFRSF18	TNFRSF18	8784	AITR|CD357|GITR|GITR-D	tumor necrosis factor receptor superfamily_ member 18	4.81728	4.25861	4.16889	2.70277	0.35542	0.621073	4.0912	1.04143	6.76028	-1.70407	0.0380528	0.830733
TNFRSF9	TNFRSF9	3604	4-1BB|CD137|CDw137|ILA	tumor necrosis factor receptor superfamily_ member 9	7.13921	5.481	3.16889	4.07473	2.48095	0.621073	4.67617	2.19343	13.2639	-2.15528	0.0995142	0.830733
TNFSF11	TNFSF11	8600	CD254|ODF|OPGL|OPTB2|RANKL|TRANCE|hRANKL2|sOdf	tumor necrosis factor (ligand) superfamily_ member 11	4.81728	4.67364	3.49082	1.20027	0.217916	2.03611	5.41313	-0.128496	6.56632	-0.678072	0.500014	0.861393
TNFSF13B	TNFSF13B	10673	BAFF|BLYS|CD257|DTL|TALL-1|TALL1|THANK|TNFSF20|ZTNF4	tumor necrosis factor (ligand) superfamily_ member 13b	4.81728	5.58053	4.16889	3.70277	2.91836	3.40534	5.89856	2.95897	18.143	-0.263034	0.754484	0.9381
TNFSF14	TNFSF14	8740	CD258|HVEML|LIGHT|LTg|TR2	tumor necrosis factor (ligand) superfamily_ member 14	4.81728	4.25861	3.49082	3.37019	2.32225	2.15159	5.0912	2.51536	11.3307	-0.180572	0.816976	0.960855
TNFSF8	TNFSF8	944	CD153|CD30L|CD30LG	tumor necrosis factor (ligand) superfamily_ member 8	7.13921	4.25861	3.16889	3.31574	1.35542	2.49554	5.0912	1.67886	11.8182	-0.628031	0.461566	0.842916
TNS1	TNS1	7145	MST091|MST122|MST127|MSTP091|MSTP122|MSTP127|MXRA6|PPP1R155|TNS	tensin 1	4.81728	5.25861	6.16889	5.90071	5.33893	6.57527	4.0912	5.58575	44.2339	0.266098	0.900347	0.986676
TNS4	TNS4	84951	CTEN|PP14434	tensin 4	7.9872	5.92157	5.49082	4.24951	2.35542	3.095	7.17867	1.33094	26.0126	-0.720314	0.53225	0.861393
TOP2A	TOP2A	7153	TOP2|TP2A	topoisomerase (DNA) II alpha	7.40224	6.95905	7.25635	6.99179	8.55331	6.58557	7.0912	8.0085	163.824	1.06064	0.147229	0.830733
TOX	TOX	9760	TOX1	thymocyte selection-associated high mobility group box	6.40224	3.99557	3.97625	3.93723	2.28831	1.69908	4.67617	2.62639	12.9974	-0.552541	0.532992	0.861393
TOX2	TOX2	84969	C20orf100|GCX-1|GCX1|dJ1108D11.2|dJ495O3.1	TOX high mobility group box family member 2	6.81728	2.67364	2.16889	2.70277	1.28831	2.49554	5.0912	3.57194	10.2049	1.078	0.273576	0.830733
TOX3	TOX3	27324	CAGF9|TNRC9	TOX high mobility group box family member 3	7.40224	4.84357	4.62832	6.31343	3.6904	5.78654	6.41313	0.456467	30.734	-0.107803	0.91397	0.986676
TOX4	TOX4	9878	C14orf92|KIAA0737|LCP1|MIG7	TOX high mobility group box family member 4	4.81728	5.99557	7.14617	6.84252	5.66748	6.84347	5.89856	5.89941	70.4636	-0.273834	0.78338	0.948055
TP53	TP53	7157	BCC7|LFS1|P53|TRP53	tumor protein p53	5.81728	6.58053	5.86933	7.27945	6.68389	4.8087	6.89856	4.98003	69.2971	-0.230884	0.817501	0.960855
TP73	TP73	7161	P73	tumor protein p73	4.81728	1.67364	3.75385	0.489772	0.596428	1.91058	4.0912	-2.1285	3.73351	0.36368	0.440008	0.839259
TPD52	TPD52	7163	D52|N8L|PC-1|PrLZ|hD52	tumor protein D52	4.81728	6.99557	7.95025	8.79894	6.73834	8.53662	6.89856	7.10273	150.101	-0.193942	0.864128	0.979699
TPI1	TPI1	7167	HEL-S-49|TIM|TPI|TPID	triosephosphate isomerase 1	6.81728	10.6509	10.3759	9.61083	8.98643	9.45712	10.2205	10.4383	759.895	2.11039	0.444897	0.839259
TPSAB1/B2	TPSAB1/B2	NA	NA	NA	7.62463	6.3175	5.16889	3.63025	4.68389	3.77308	5.41313	1.04143	26.1113	-1.78319	0.0677624	0.830733
TPX2	TPX2	22974	C20orf1|C20orf2|DIL-2|DIL2|FLS353|GD:C20orf1|HCA519|HCTP4|REPP86|p100	TPX2_ microtubule-associated	4.81728	6.19721	6.29817	7.11648	6.73362	5.501	6.89856	7.69328	84.8562	0.724939	0.462461	0.842916
TRAF1	TRAF1	7185	EBI6|MGC:10353	TNF receptor-associated factor 1	7.62463	5.67364	5.92378	6.26156	5.03554	4.6606	6.26113	5.05141	56.1626	-0.70044	0.0258207	0.830733
TRAF6	TRAF6	7189	MGC:3310|RNF85	TNF receptor-associated factor 6_ E3 ubiquitin protein ligase	7.13921	3.99557	5.97625	4.85689	5.70977	5.82619	4.0912	5.28936	41.0854	0.834414	0.515189	0.861393
TRAT1	TRAT1	50852	HSPC062|TCRIM|TRIM	T cell receptor associated transmembrane adaptor 1	5.81728	4.67364	3.16889	3.75826	1.98345	1.15159	6.0912	2.62639	12.6305	0.63743	0.559808	0.861393
TRRAP	TRRAP	8295	PAF350/400|PAF400|STAF40|TR-AP|Tra1	transformation/transcription domain-associated protein	6.40224	6.84357	7.35872	7.33868	7.81336	7.55575	6.41313	7.28936	139.764	1.73956	0.382986	0.830733
TSPAN1	TSPAN1	10103	NET1|TM4C|TM4SF	tetraspanin 1	4.81728	4.25861	3.97625	4.24951	1.41955	6.24556	4.0912	3.19343	16.3523	1.58496	0.255526	0.830733
TTK	TTK	7272	CT96|ESK|MPH1|MPS1|MPS1L1|PYT	TTK protein kinase	4.81728	4.99557	5.41682	4.78523	4.25354	3.791	4.0912	6.04143	27.3602	0.347923	0.752608	0.9381
TUBG1	TUBG1	7283	CDCBM4|GCP-1|TUBG|TUBGCP1	tubulin_ gamma 1	5.81728	4.84357	5.07578	5.72731	5.77251	4.93496	5.67617	5.50813	42.7977	0.641952	0.457936	0.842916
TXN	TXN	7295	TRDX|TRX|TRX1	thioredoxin	6.40224	8.97742	8.29817	9.47561	9.0159	9.9039	9.81913	9.35985	479.88	2.84498	0.251915	0.830733
TXN2	TXN2	25828	MT-TRX|MTRX|TRX2	thioredoxin 2	7.40224	6.62784	5.81275	5.99324	6.26885	6.34597	7.33913	6.30196	91.2338	0.777608	0.0964953	0.830733
TXNRD2	TXNRD2	10587	SELZ|TR|TR-BETA|TR3|TRXR2	thioredoxin reductase 2	4.81728	4.99557	6.07578	5.8117	4.10544	7.98058	5.89856	5.50813	50.1831	1.36565	0.255524	0.830733
TYROBP	TYROBP	7305	DAP12|KARAP|PLOSL	TYRO protein tyrosine kinase binding protein	4.81728	7.97742	7.14617	8.57868	5.89317	6.57268	7.89856	6.46769	121.008	0.766176	0.717146	0.924388
UBE2C	UBE2C	11065	UBCH10|dJ447F3.2	ubiquitin-conjugating enzyme E2C	4.81728	6.62784	6.21328	7.25675	6.06842	5.67032	5.89856	7.71699	77.907	0.213464	0.842601	0.973838
UBE2T	UBE2T	29089	FANCT|HSPC150|PIG50	ubiquitin-conjugating enzyme E2T	4.81728	3.25861	4.97625	5.49387	4.35542	4.46237	5.0912	5.07118	25.8263	0.203533	0.869088	0.979699
UCHL5	UCHL5	51377	CGI-70|INO80R|UCH-L5|UCH37	ubiquitin carboxyl-terminal hydrolase L5	5.81728	5.67364	5.86933	5.65605	5.92941	5.69908	6.41313	6.70755	62.7127	1.86668	0.228705	0.830733
UGDH	UGDH	7358	GDH|UDP-GlcDH|UDPGDH|UGD	UDP-glucose 6-dehydrogenase	4.81728	5.84357	5.49082	5.18009	4.67735	5.83485	4.0912	5.3872	35.8847	0.0509252	0.979191	0.989915
VAV1	VAV1	7409	VAV	vav 1 guanine nucleotide exchange factor	7.81728	5.13308	5.25635	4.68855	4.15338	3.15159	7.26113	3.45647	34.6487	0.0389941	0.965168	0.989098
VCP	VCP	7415	ALS14|HEL-220|HEL-S-70|IBMPFD|IBMPFD1|TERA|p97	valosin containing protein	5.81728	8.34607	8.41682	9.18231	7.79232	9.73655	8.1356	8.27877	296.773	1.97424	0.40561	0.833614
VEGFA	VEGFA	7422	MVCD1|VEGF|VPF	vascular endothelial growth factor A	7.62463	6.42853	7.59516	5.57337	7.00059	7.12003	7.33913	6.60621	120.339	0.496109	0.287636	0.830733
VEGFB	VEGFB	7423	VEGFL|VRF	vascular endothelial growth factor B	5.81728	5.25861	7.07578	6.49182	6.2134	7.68955	6.79164	6.16613	86.704	0.829696	0.414539	0.833614
VEGFC	VEGFC	7424	Flt4-L|LMPH1D|VRP	vascular endothelial growth factor C	5.81728	5.13308	5.16889	4.26875	3.70334	4.84347	5.89856	3.9159	28.7135	0.22556	0.721867	0.924388
VEGFD	VEGFD	2277	VEGF-D|VEGFD|FIGF	c-fos induced growth factor (vascular endothelial growth factor D)	4.81728	3.67364	3.49082	3.6742	0.983451	1.2585	6.0912	2.45647	9.88812	1.37851	0.27818	0.830733
VWF	VWF	7450	F8VWF|VWD	von Willebrand factor	4.81728	5.84357	6.52644	7.15833	5.97547	7.22593	6.79164	6.02125	78.5202	0.387661	0.681531	0.901494
WASF2	WASF2	10163	IMD2|SCAR2|WASF4|WAVE2|dJ393P12.2	WAS protein family_ member 2	6.40224	7.28835	8.30844	7.45451	8.38433	7.73424	7.41313	7.93085	195.973	2.05755	0.329423	0.830733
WEE1	WEE1	7465	WEE1A|WEE1hu	WEE1 G2 checkpoint kinase	4.81728	7.0312	6.41682	6.02186	7.76481	7.76516	6.9981	7.16842	107.482	2.52333	0.172379	0.830733
WNT5A	WNT5A	7474	hWNT5A	wingless-type MMTV integration site family_ member 5A	4.81728	6.95905	5.97625	4.96108	3.9728	5.93496	5.0912	3.22906	34.7204	-1.16619	0.364157	0.830733
WRAP53	WRAP53	55135	DKCB3|TCAB1|WDR79	WD repeat containing_ antisense to TP53	8.51772	5.481	6.16889	4.56172	3.45058	3.20604	6.79164	4.06133	38.8506	-1.60706	0.112226	0.830733
WWC1	WWC1	23286	HBEBP3|HBEBP36|KIBRA|MEMRYQTL|PPP1R168	WW and C2 domain containing 1	4.81728	5.481	4.86933	4.95515	4.43515	6.36404	5.0912	4.80224	34.3425	0.711495	0.530422	0.861393
WWTR1	WWTR1	25937	TAZ	WW domain containing transcription regulator 1	6.40224	6.25861	8.00178	6.75996	7.2634	6.45958	8.67617	8.05762	150.636	1.07764	0.323068	0.830733
XBP1	XBP1	7494	TREB-5|TREB5|XBP-1|XBP2	X-box binding protein 1	9.2096	8.09991	10.0454	9.54283	6.42542	12.2003	8.51747	8.05886	516.448	1.11249	0.335425	0.830733
XCL1/2	XCL1/2	NA	NA	NA	4.81728	3.99557	4.49082	4.08562	2.5107	1.53861	5.41313	3.54393	13.9236	-0.447459	0.608211	0.875259
XRCC2	XRCC2	7516	-	X-ray repair complementing defective repair in Chinese hamster cells 2	5.81728	6.13308	6.12309	5.63397	6.4847	4.62107	5.0912	6.02125	53.4718	-0.0497977	0.981541	0.989966
YAP1	YAP1	10413	COB1|YAP|YAP2|YAP65|YKI	Yes-associated protein 1	4.81728	6.19721	6.52644	6.21769	6.54704	6.65082	6.0912	6.79632	75.0875	1.61191	0.352795	0.830733
ZAP70	ZAP70	7535	SRK|STCD|STD|TZK|ZAP-70	zeta-chain (TCR) associated protein kinase 70kDa	6.81728	4.84357	3.75385	5.90071	3.87327	2.943	5.0912	4.21135	25.6214	-0.925999	0.471941	0.844049
ZEB1	ZEB1	6935	AREB6|BZP|DELTAEF1|FECD6|NIL2A|PPCD3|TCF8|ZFHEP|ZFHX1A	zinc finger E-box binding homeobox 1	5.81728	3.67364	5.62832	4.70277	4.37172	5.63602	4.0912	3.72949	26.1059	0.352672	0.780902	0.948055
ZMYM2	ZMYM2	7750	FIM|MYM|RAMP|SCLL|ZNF198	zinc finger_ MYM-type 2	4.81728	5.99557	7.49082	5.41836	6.94448	7.20436	5.89856	6.73878	79.5355	0.605089	0.569462	0.861393
