# Supplementary material
Source: Research Square preprint supplement (doi:10.21203/rs.3.rs-9572543/v1)
Supplement: Supplementary file 11 [file 8217738a6742c785d6ec77d1.xlsx]

## Sheet: TableS12
group	cell_type	n_cells	pct_within_group	total_in_group	Gene
responder	Adipocytes	15	0.0448109	33474	CD247
responder	B cells	462	1.38018	33474	CD247
responder	Breast cancer	576	1.72074	33474	CD247
responder	Breast glandular cells	5066	15.1341	33474	CD247
responder	Breast myoepithelial cells	20	0.0597479	33474	CD247
responder	Dendritic cells	5	0.014937	33474	CD247
responder	Endothelial cells	32	0.0955966	33474	CD247
responder	Fibroblasts	1061	3.16962	33474	CD247
responder	Macrophages	2112	6.30937	33474	CD247
responder	NK cells	31	0.0926092	33474	CD247
responder	Smooth muscle cells	25	0.0746848	33474	CD247
responder	T cells	24069	71.9036	33474	CD247
non-responder	Adipocytes	16	0.0931424	17178	CD247
non-responder	B cells	66	0.384212	17178	CD247
non-responder	Breast cancer	387	2.25288	17178	CD247
non-responder	Breast glandular cells	4282	24.9272	17178	CD247
non-responder	Breast myoepithelial cells	38	0.221213	17178	CD247
non-responder	Dendritic cells	2	0.0116428	17178	CD247
non-responder	Endothelial cells	8	0.0465712	17178	CD247
non-responder	Epithelial cells	3	0.0174642	17178	CD247
non-responder	Fibroblasts	609	3.54523	17178	CD247
non-responder	Macrophages	585	3.40552	17178	CD247
non-responder	NK cells	12	0.0698568	17178	CD247
non-responder	Smooth muscle cells	19	0.110607	17178	CD247
non-responder	T cells	11151	64.9144	17178	CD247
responder	Adipocytes	25	0.0369298	67696	CD3E
responder	B cells	872	1.28811	67696	CD3E
responder	Breast cancer	919	1.35754	67696	CD3E
responder	Breast glandular cells	9900	14.6242	67696	CD3E
responder	Breast myoepithelial cells	44	0.0649965	67696	CD3E
responder	Dendritic cells	2	0.00295438	67696	CD3E
responder	Endothelial cells	62	0.0915859	67696	CD3E
responder	Epithelial cells	1	0.00147719	67696	CD3E
responder	Fibroblasts	2457	3.62946	67696	CD3E
responder	Macrophages	4120	6.08603	67696	CD3E
responder	NK cells	7	0.0103403	67696	CD3E
responder	Smooth muscle cells	38	0.0561333	67696	CD3E
responder	T cells	49249	72.7502	67696	CD3E
non-responder	Adipocytes	15	0.0421929	35551	CD3E
non-responder	B cells	91	0.25597	35551	CD3E
non-responder	Breast cancer	731	2.0562	35551	CD3E
non-responder	Breast glandular cells	7507	21.1161	35551	CD3E
non-responder	Breast myoepithelial cells	59	0.165959	35551	CD3E
non-responder	Dendritic cells	1	0.00281286	35551	CD3E
non-responder	Endothelial cells	14	0.03938	35551	CD3E
non-responder	Epithelial cells	1	0.00281286	35551	CD3E
non-responder	Fibroblasts	1447	4.07021	35551	CD3E
non-responder	Macrophages	1316	3.70172	35551	CD3E
non-responder	NK cells	1	0.00281286	35551	CD3E
non-responder	Smooth muscle cells	40	0.112514	35551	CD3E
non-responder	T cells	24328	68.4313	35551	CD3E
responder	Adipocytes	13	0.0405566	32054	CD3G
responder	B cells	326	1.01703	32054	CD3G
responder	Breast cancer	383	1.19486	32054	CD3G
responder	Breast glandular cells	4555	14.2104	32054	CD3G
responder	Breast myoepithelial cells	16	0.0499158	32054	CD3G
responder	Dendritic cells	1	0.00311974	32054	CD3G
responder	Endothelial cells	33	0.102951	32054	CD3G
responder	Epithelial cells	2	0.00623947	32054	CD3G
responder	Fibroblasts	853	2.66113	32054	CD3G
responder	Macrophages	1514	4.72328	32054	CD3G
responder	NK cells	1	0.00311974	32054	CD3G
responder	Smooth muscle cells	16	0.0499158	32054	CD3G
responder	T cells	24341	75.9375	32054	CD3G
non-responder	Adipocytes	8	0.0513908	15567	CD3G
non-responder	B cells	30	0.192715	15567	CD3G
non-responder	Breast cancer	234	1.50318	15567	CD3G
non-responder	Breast glandular cells	3048	19.5799	15567	CD3G
non-responder	Breast myoepithelial cells	16	0.102782	15567	CD3G
non-responder	Endothelial cells	7	0.0449669	15567	CD3G
non-responder	Epithelial cells	4	0.0256954	15567	CD3G
non-responder	Fibroblasts	492	3.16053	15567	CD3G
non-responder	Macrophages	431	2.76868	15567	CD3G
non-responder	Smooth muscle cells	10	0.0642385	15567	CD3G
non-responder	T cells	11287	72.5059	15567	CD3G
responder	Adipocytes	36	0.063179	56981	CD8A
responder	B cells	760	1.33378	56981	CD8A
responder	Breast cancer	1000	1.75497	56981	CD8A
responder	Breast glandular cells	13712	24.0642	56981	CD8A
responder	Breast myoepithelial cells	48	0.0842386	56981	CD8A
responder	Dendritic cells	2	0.00350994	56981	CD8A
responder	Endothelial cells	58	0.101788	56981	CD8A
responder	Fibroblasts	1840	3.22915	56981	CD8A
responder	Macrophages	3846	6.74962	56981	CD8A
responder	NK cells	5	0.00877485	56981	CD8A
responder	Smooth muscle cells	36	0.063179	56981	CD8A
responder	T cells	35638	62.5437	56981	CD8A
non-responder	Adipocytes	15	0.0453872	33049	CD8A
non-responder	B cells	101	0.305607	33049	CD8A
non-responder	Breast cancer	783	2.36921	33049	CD8A
non-responder	Breast glandular cells	11107	33.6077	33049	CD8A
non-responder	Breast myoepithelial cells	77	0.232987	33049	CD8A
non-responder	Endothelial cells	17	0.0514388	33049	CD8A
non-responder	Epithelial cells	2	0.00605162	33049	CD8A
non-responder	Fibroblasts	1344	4.06669	33049	CD8A
non-responder	Macrophages	1208	3.65518	33049	CD8A
non-responder	NK cells	1	0.00302581	33049	CD8A
non-responder	Smooth muscle cells	33	0.0998517	33049	CD8A
non-responder	T cells	18361	55.5569	33049	CD8A
responder	Adipocytes	23	0.0502436	45777	GZMA
responder	B cells	508	1.10973	45777	GZMA
responder	Breast cancer	615	1.34347	45777	GZMA
responder	Breast glandular cells	6631	14.4854	45777	GZMA
responder	Breast myoepithelial cells	23	0.0502436	45777	GZMA
responder	Endothelial cells	34	0.0742731	45777	GZMA
responder	Fibroblasts	1281	2.79835	45777	GZMA
responder	Macrophages	3168	6.92051	45777	GZMA
responder	NK cells	11	0.0240295	45777	GZMA
responder	Smooth muscle cells	21	0.0458746	45777	GZMA
responder	T cells	33462	73.0978	45777	GZMA
non-responder	Adipocytes	14	0.0714031	19607	GZMA
non-responder	B cells	61	0.311113	19607	GZMA
non-responder	Breast cancer	340	1.73407	19607	GZMA
non-responder	Breast glandular cells	3450	17.5958	19607	GZMA
non-responder	Breast myoepithelial cells	30	0.153007	19607	GZMA
non-responder	Endothelial cells	9	0.045902	19607	GZMA
non-responder	Epithelial cells	4	0.0204009	19607	GZMA
non-responder	Fibroblasts	722	3.68236	19607	GZMA
non-responder	Macrophages	792	4.03937	19607	GZMA
non-responder	NK cells	3	0.0153007	19607	GZMA
non-responder	Smooth muscle cells	18	0.0918039	19607	GZMA
non-responder	T cells	14164	72.2395	19607	GZMA
responder	Adipocytes	9	0.0273149	32949	CCR2
responder	B cells	5402	16.395	32949	CCR2
responder	Breast cancer	447	1.35664	32949	CCR2
responder	Breast glandular cells	4622	14.0277	32949	CCR2
responder	Breast myoepithelial cells	8	0.0242799	32949	CCR2
responder	Dendritic cells	5	0.015175	32949	CCR2
responder	Endothelial cells	26	0.0789098	32949	CCR2
responder	Fibroblasts	1212	3.67841	32949	CCR2
responder	Macrophages	2891	8.77417	32949	CCR2
responder	Smooth muscle cells	20	0.0606999	32949	CCR2
responder	T cells	18307	55.5616	32949	CCR2
non-responder	Adipocytes	8	0.0952041	8403	CCR2
non-responder	B cells	339	4.03427	8403	CCR2
non-responder	Breast cancer	188	2.2373	8403	CCR2
non-responder	Breast glandular cells	2597	30.9056	8403	CCR2
non-responder	Breast myoepithelial cells	12	0.142806	8403	CCR2
non-responder	Dendritic cells	1	0.0119005	8403	CCR2
non-responder	Endothelial cells	6	0.0714031	8403	CCR2
non-responder	Epithelial cells	2	0.023801	8403	CCR2
non-responder	Fibroblasts	335	3.98667	8403	CCR2
non-responder	Macrophages	769	9.15149	8403	CCR2
non-responder	Smooth muscle cells	10	0.119005	8403	CCR2
non-responder	T cells	4136	49.2205	8403	CCR2
responder	Adipocytes	445	0.446756	99607	CXCL12
responder	B cells	2543	2.55303	99607	CXCL12
responder	Breast cancer	8777	8.81163	99607	CXCL12
responder	Breast glandular cells	28223	28.3344	99607	CXCL12
responder	Breast myoepithelial cells	89	0.0893512	99607	CXCL12
responder	Endothelial cells	583	0.5853	99607	CXCL12
responder	Epithelial cells	1	0.00100395	99607	CXCL12
responder	Fibroblasts	23690	23.7835	99607	CXCL12
responder	Macrophages	12645	12.6949	99607	CXCL12
responder	Mast cells	1	0.00100395	99607	CXCL12
responder	NK cells	3	0.00301184	99607	CXCL12
responder	Smooth muscle cells	260	0.261026	99607	CXCL12
responder	T cells	22347	22.4352	99607	CXCL12
non-responder	Adipocytes	267	0.480709	55543	CXCL12
non-responder	B cells	269	0.484309	55543	CXCL12
non-responder	Breast cancer	6530	11.7567	55543	CXCL12
non-responder	Breast glandular cells	20428	36.7787	55543	CXCL12
non-responder	Breast myoepithelial cells	122	0.21965	55543	CXCL12
non-responder	Dendritic cells	6	0.0108024	55543	CXCL12
non-responder	Endothelial cells	267	0.480709	55543	CXCL12
non-responder	Epithelial cells	4	0.00720163	55543	CXCL12
non-responder	Fibroblasts	15220	27.4022	55543	CXCL12
non-responder	Macrophages	3863	6.95497	55543	CXCL12
non-responder	NK cells	2	0.00360081	55543	CXCL12
non-responder	Smooth muscle cells	290	0.522118	55543	CXCL12
non-responder	T cells	8275	14.8984	55543	CXCL12
responder	Adipocytes	17	0.0282233	60234	AURKA
responder	B cells	537	0.891523	60234	AURKA
responder	Breast cancer	1824	3.02819	60234	AURKA
responder	Breast glandular cells	44804	74.3832	60234	AURKA
responder	Breast myoepithelial cells	42	0.0697281	60234	AURKA
responder	Dendritic cells	2	0.00332038	60234	AURKA
responder	Endothelial cells	35	0.0581067	60234	AURKA
responder	Fibroblasts	958	1.59046	60234	AURKA
responder	Macrophages	1735	2.88043	60234	AURKA
responder	Smooth muscle cells	35	0.0581067	60234	AURKA
responder	T cells	10245	17.0087	60234	AURKA
non-responder	Adipocytes	16	0.0249544	64117	AURKA
non-responder	B cells	59	0.0920193	64117	AURKA
non-responder	Breast cancer	2641	4.11903	64117	AURKA
non-responder	Breast glandular cells	54831	85.5171	64117	AURKA
non-responder	Breast myoepithelial cells	325	0.506886	64117	AURKA
non-responder	Endothelial cells	23	0.0358719	64117	AURKA
non-responder	Epithelial cells	12	0.0187158	64117	AURKA
non-responder	Fibroblasts	742	1.15726	64117	AURKA
non-responder	Macrophages	717	1.11827	64117	AURKA
non-responder	NK cells	1	0.00155965	64117	AURKA
non-responder	Smooth muscle cells	31	0.0483491	64117	AURKA
non-responder	T cells	4719	7.35998	64117	AURKA
responder	Adipocytes	12	0.0453189	26479	KIT
responder	B cells	143	0.540051	26479	KIT
responder	Breast cancer	1849	6.98289	26479	KIT
responder	Breast glandular cells	21739	82.099	26479	KIT
responder	Breast myoepithelial cells	20	0.0755316	26479	KIT
responder	Dendritic cells	4	0.0151063	26479	KIT
responder	Endothelial cells	30	0.113297	26479	KIT
responder	Epithelial cells	1	0.00377658	26479	KIT
responder	Fibroblasts	253	0.955474	26479	KIT
responder	Macrophages	362	1.36712	26479	KIT
responder	Mast cells	1	0.00377658	26479	KIT
responder	Smooth muscle cells	10	0.0377658	26479	KIT
responder	T cells	2055	7.76087	26479	KIT
non-responder	Adipocytes	23	0.029159	78878	KIT
non-responder	B cells	37	0.0469079	78878	KIT
non-responder	Breast cancer	5547	7.03238	78878	KIT
non-responder	Breast glandular cells	69939	88.6673	78878	KIT
non-responder	Breast myoepithelial cells	413	0.523593	78878	KIT
non-responder	Dendritic cells	1	0.00126778	78878	KIT
non-responder	Endothelial cells	43	0.0545146	78878	KIT
non-responder	Epithelial cells	14	0.0177489	78878	KIT
non-responder	Fibroblasts	506	0.641497	78878	KIT
non-responder	Macrophages	346	0.438652	78878	KIT
non-responder	Mast cells	1	0.00126778	78878	KIT
non-responder	Smooth muscle cells	16	0.0202845	78878	KIT
non-responder	T cells	1992	2.52542	78878	KIT
responder	Adipocytes	157	0.160996	97518	LARS
responder	B cells	1714	1.75762	97518	LARS
responder	Breast cancer	3507	3.59626	97518	LARS
responder	Breast glandular cells	65656	67.3271	97518	LARS
responder	Breast myoepithelial cells	91	0.0933161	97518	LARS
responder	Dendritic cells	5	0.00512726	97518	LARS
responder	Endothelial cells	246	0.252261	97518	LARS
responder	Epithelial cells	1	0.00102545	97518	LARS
responder	Fibroblasts	4327	4.43713	97518	LARS
responder	Macrophages	4973	5.09957	97518	LARS
responder	Mast cells	2	0.0020509	97518	LARS
responder	NK cells	6	0.00615271	97518	LARS
responder	Smooth muscle cells	417	0.427613	97518	LARS
responder	T cells	16416	16.8338	97518	LARS
non-responder	Adipocytes	141	0.116799	120720	LARS
non-responder	B cells	204	0.168986	120720	LARS
non-responder	Breast cancer	5307	4.39612	120720	LARS
non-responder	Breast glandular cells	99759	82.6367	120720	LARS
non-responder	Breast myoepithelial cells	617	0.5111	120720	LARS
non-responder	Dendritic cells	3	0.00248509	120720	LARS
non-responder	Endothelial cells	136	0.112657	120720	LARS
non-responder	Epithelial cells	28	0.0231942	120720	LARS
non-responder	Fibroblasts	3500	2.89927	120720	LARS
non-responder	Macrophages	2100	1.73956	120720	LARS
non-responder	Smooth muscle cells	513	0.42495	120720	LARS
non-responder	T cells	8412	6.96819	120720	LARS
responder	Adipocytes	13	0.0100817	128947	VEGFA
responder	B cells	1431	1.10976	128947	VEGFA
responder	Breast cancer	4232	3.28197	128947	VEGFA
responder	Breast glandular cells	106962	82.9504	128947	VEGFA
responder	Breast myoepithelial cells	88	0.0682451	128947	VEGFA
responder	Dendritic cells	5	0.00387756	128947	VEGFA
responder	Endothelial cells	15	0.0116327	128947	VEGFA
responder	Epithelial cells	3	0.00232654	128947	VEGFA
responder	Fibroblasts	4268	3.30989	128947	VEGFA
responder	Macrophages	3012	2.33584	128947	VEGFA
responder	Smooth muscle cells	103	0.0798778	128947	VEGFA
responder	T cells	8815	6.83614	128947	VEGFA
non-responder	Adipocytes	22	0.0113166	194405	VEGFA
non-responder	B cells	207	0.106479	194405	VEGFA
non-responder	Breast cancer	5752	2.95877	194405	VEGFA
non-responder	Breast glandular cells	178671	91.9066	194405	VEGFA
non-responder	Breast myoepithelial cells	591	0.304005	194405	VEGFA
non-responder	Dendritic cells	4	0.00205756	194405	VEGFA
non-responder	Endothelial cells	10	0.0051439	194405	VEGFA
non-responder	Epithelial cells	27	0.0138885	194405	VEGFA
non-responder	Fibroblasts	3203	1.64759	194405	VEGFA
non-responder	Macrophages	1398	0.719117	194405	VEGFA
non-responder	NK cells	1	0.00051439	194405	VEGFA
non-responder	Smooth muscle cells	152	0.0781873	194405	VEGFA
non-responder	T cells	4367	2.24634	194405	VEGFA
responder	Adipocytes	405	0.296958	136383	WARS
responder	B cells	3606	2.64402	136383	WARS
responder	Breast cancer	5889	4.31799	136383	WARS
responder	Breast glandular cells	68163	49.9791	136383	WARS
responder	Breast myoepithelial cells	189	0.13858	136383	WARS
responder	Dendritic cells	16	0.0117317	136383	WARS
responder	Endothelial cells	1267	0.929001	136383	WARS
responder	Epithelial cells	1	0.000733229	136383	WARS
responder	Fibroblasts	10421	7.64098	136383	WARS
responder	Macrophages	15186	11.1348	136383	WARS
responder	Mast cells	1	0.000733229	136383	WARS
responder	NK cells	13	0.00953198	136383	WARS
responder	Smooth muscle cells	321	0.235367	136383	WARS
responder	T cells	30905	22.6604	136383	WARS
non-responder	Adipocytes	182	0.194561	93544	WARS
non-responder	B cells	375	0.400881	93544	WARS
non-responder	Breast cancer	4779	5.10883	93544	WARS
non-responder	Breast glandular cells	64429	68.8756	93544	WARS
non-responder	Breast myoepithelial cells	518	0.55375	93544	WARS
non-responder	Dendritic cells	8	0.00855213	93544	WARS
non-responder	Endothelial cells	445	0.475712	93544	WARS
non-responder	Epithelial cells	27	0.0288634	93544	WARS
non-responder	Fibroblasts	7064	7.55153	93544	WARS
non-responder	Macrophages	4071	4.35196	93544	WARS
non-responder	NK cells	3	0.00320705	93544	WARS
non-responder	Smooth muscle cells	270	0.288634	93544	WARS
non-responder	T cells	11373	12.1579	93544	WARS
responder	Adipocytes	27	0.0342818	78759	WEE1
responder	B cells	351	0.445663	78759	WEE1
responder	Breast cancer	1780	2.26006	78759	WEE1
responder	Breast glandular cells	66107	83.9358	78759	WEE1
responder	Breast myoepithelial cells	48	0.0609454	78759	WEE1
responder	Dendritic cells	2	0.00253939	78759	WEE1
responder	Endothelial cells	30	0.0380909	78759	WEE1
responder	Epithelial cells	1	0.0012697	78759	WEE1
responder	Fibroblasts	1330	1.6887	78759	WEE1
responder	Macrophages	1391	1.76615	78759	WEE1
responder	NK cells	1	0.0012697	78759	WEE1
responder	Smooth muscle cells	35	0.0444394	78759	WEE1
responder	T cells	7656	9.72079	78759	WEE1
non-responder	Adipocytes	29	0.0185234	156559	WEE1
non-responder	B cells	57	0.036408	156559	WEE1
non-responder	Breast cancer	4727	3.01931	156559	WEE1
non-responder	Breast glandular cells	144820	92.5019	156559	WEE1
non-responder	Breast myoepithelial cells	406	0.259327	156559	WEE1
non-responder	Endothelial cells	36	0.0229945	156559	WEE1
non-responder	Epithelial cells	18	0.0114973	156559	WEE1
non-responder	Fibroblasts	1327	0.847604	156559	WEE1
non-responder	Macrophages	762	0.486717	156559	WEE1
non-responder	Smooth muscle cells	59	0.0376855	156559	WEE1
non-responder	T cells	4318	2.75807	156559	WEE1
