# Supplementary material
Source: Research Square preprint supplement (doi:10.21203/rs.3.rs-9572543/v1)
Supplement: Supplementary file 14 [file c1f3e32cb83df319595f6041.xlsx]

## Sheet: TableS7
p_val	avg_log2FC	pct.1	pct.2	p_val_adj	cluster	gene
0	4.07626	0.942	0.104	0	0	MYBPC1
0	3.73408	0.986	0.167	0	0	KRT6B
0	2.41473	0.989	0.376	0	0	KRT14
0	1.85574	0.86	0.251	0	0	SERPINA3
0	3.29288	0.759	0.169	0	0	GJB2
0	1.98772	0.802	0.215	0	0	KIT
0	2.79202	0.993	0.411	0	0	KRT5
0	1.71199	0.846	0.304	0	0	FOXC1
0	2.05426	0.682	0.179	0	0	CDC14A
0	1.15578	0.795	0.312	0	0	KLF5
0	0.421908	0.967	0.497	0	0	TACSTD2
0	1.49623	0.846	0.394	0	0	BACE2
0	1.77424	0.638	0.188	0	0	S100A14
0	1.49297	0.683	0.238	0	0	SLPI
0	2.54243	0.996	0.551	0	0	DSP
0	1.4623	0.735	0.303	0	0	CENPF
0	1.84017	0.631	0.203	0	0	CCNA2
0	1.24155	0.754	0.334	0	0	TUBA4A
0	1.42866	0.781	0.368	0	0	SQLE
0	1.65955	0.98	0.577	0	0	CCND1
0	1.37239	0.906	0.506	0	0	FLNB
0	1.48697	0.683	0.284	0	0	CDC20
0	1.52079	0.634	0.25	0	0	LYPD3
0	1.08636	0.9	0.518	0	0	DST
0	1.17333	0.759	0.383	0	0	CCNB1
0	1.01117	0.803	0.432	0	0	CDH1
0	1.13686	0.951	0.58	0	0	LDHB
0	0.945362	0.842	0.476	0	0	SRPK1
0	1.18896	0.558	0.194	0	0	EGFR
0	1.00023	0.967	0.614	0	0	DSC2
0	1.10801	0.569	0.241	0	0	PELI1
0	1.15063	0.561	0.243	0	0	HOOK2
0	0.634958	0.97	0.655	0	0	KRT8
0	0.36455	0.74	0.426	0	0	TOP2A
0	0.921792	0.591	0.277	0	0	SDC4
0	1.03881	0.568	0.259	0	0	AURKA
0	0.468946	0.694	0.395	0	0	CXCR4
0	0.861062	0.784	0.491	0	0	LARS
0	0.784104	0.563	0.283	0	0	MASTL
0	1.17943	0.995	0.716	0	0	KRT7
0	2.77467	0.321	0.044	0	0	CCNA1
0	0.948307	0.476	0.201	0	0	RTKN2
0	0.297516	0.975	0.703	0	0	EPCAM
0	0.492652	0.819	0.547	0	0	SEC11C
0	1.29058	0.41	0.144	0	0	LGALSL
0	0.801317	0.531	0.27	0	0	DNTTIP1
0	0.320704	0.844	0.585	0	0	VEGFA
0	0.258897	0.876	0.624	0	0	TPD52
0	3.0556	0.277	0.029	0	0	NDUFA4L2
0	1.4196	0.37	0.123	0	0	AURKB
0	0.639244	0.594	0.347	0	0	SLC5A6
0	0.317297	0.681	0.442	0	0	ATM
0	0.994378	0.416	0.182	0	0	MKI67
0	0.413896	0.783	0.549	0	0	TRAPPC3
0	0.446287	0.539	0.321	0	0	EIF4EBP1
0	0.139234	0.562	0.346	0	0	CDKN1A
0	0.226205	0.873	0.658	0	0	ENAH
0	0.729754	0.411	0.204	0	0	USP53
0	0.318404	0.785	0.58	0	0	CCDC6
0	0.3113	0.741	0.538	0	0	CREBBP
0	0.222528	0.589	0.395	0	0	JUP
0	0.220997	0.827	0.635	0	0	CTTN
0	0.627673	0.383	0.194	0	0	TIFA
0	0.462585	0.444	0.262	0	0	TRAF4
0	0.156039	0.763	0.589	0	0	HIF1A
0	0.424574	0.434	0.263	0	0	TRIB1
0	0.219261	0.44	0.275	0	0	SH3YL1
0	0.303913	0.388	0.234	0	0	PCLAF
0	0.497478	0.317	0.173	0	0	THAP2
0	0.164121	0.217	0.082	0	0	KDR
0	0.928999	0.198	0.075	0	0	DMKN
0	1.79892	0.151	0.03	0	0	TIMP4
0	0.327825	0.276	0.166	0	0	CDC42EP1
0	1.03008	0.14	0.045	0	0	FOXC2
0	0.808274	0.143	0.057	0	0	OXTR
0	1.23716	0.123	0.042	0	0	CTH
0	0.250186	0.979	0.898	0	0	PKM
1.36098e-270	2.45623	0.02	0.003	7.3629e-268	0	UnassignedCodeword-0030
4.66689e-261	0.160297	0.713	0.531	2.52479e-258	0	HMGA1
1.37846e-250	3.78798	0.012	0.001	7.45747e-248	0	UnassignedCodeword-0321
1.2392e-220	0.127607	0.744	0.562	6.70409e-218	0	TMEM147
1.14131e-190	0.242088	0.255	0.171	6.17448e-188	0	C6orf132
5.65976e-189	0.178036	0.17	0.103	3.06193e-186	0	C2orf42
3.45988e-168	2.82016	0.01	0.001	1.8718e-165	0	UnassignedCodeword-0120
1.25252e-129	0.137841	0.088	0.05	6.77614e-127	0	SNAI1
4.41031e-56	0.198742	0.053	0.033	2.38598e-53	0	UnassignedCodeword-0122
0	3.00689	0.901	0.166	0	1	AQP1
0	3.41916	0.868	0.191	0	1	PTN
0	2.70453	0.969	0.336	0	1	SFRP1
0	2.43314	0.934	0.42	0	1	BCL2
0	2.10111	0.819	0.322	0	1	KLF5
0	4.21794	0.48	0.037	0	1	NCAM1
0	1.66642	0.681	0.24	0	1	FBLN1
0	2.09096	0.855	0.414	0	1	TOP2A
0	1.68664	0.864	0.427	0	1	ITM2C
0	2.05771	0.555	0.14	0	1	KRT23
0	1.61682	0.619	0.205	0	1	TCF4
0	1.75429	0.731	0.344	0	1	E2F3
0	2.11348	0.665	0.279	0	1	SLC25A37
0	2.87745	0.461	0.089	0	1	TUBB2B
0	2.01823	0.567	0.205	0	1	PCLAF
0	1.33665	0.805	0.446	0	1	BASP1
0	1.08654	0.889	0.539	0	1	PTEN
0	1.56189	0.872	0.524	0	1	WEE1
0	1.28104	0.951	0.628	0	1	DSC2
0	1.41135	0.787	0.466	0	1	ZNF562
0	1.3022	0.755	0.439	0	1	CDC25B
0	1.00019	0.799	0.495	0	1	ERBB2
0	1.46037	0.615	0.313	0	1	EIF4EBP1
0	1.84061	0.964	0.663	0	1	NARS
0	3.56604	0.33	0.033	0	1	BMP7
0	0.99111	0.734	0.437	0	1	FAM107B
0	1.42598	0.582	0.288	0	1	MASTL
0	1.06968	0.789	0.496	0	1	SRPK1
0	1.13446	0.873	0.587	0	1	VEGFA
0	1.73381	0.43	0.159	0	1	STXBP4
0	2.04491	0.373	0.114	0	1	AKR1C1
0	1.95616	0.383	0.125	0	1	CCNE1
0	0.959553	0.806	0.558	0	1	SEC11C
0	1.53051	0.412	0.166	0	1	CDC14B
0	0.895251	0.807	0.562	0	1	CD47
0	0.717582	0.958	0.714	0	1	EPCAM
0	1.06856	0.641	0.4	0	1	SEC24A
0	0.789849	0.576	0.345	0	1	CENPF
0	1.23803	0.509	0.279	0	1	AURKA
0	1.00004	0.891	0.661	0	1	ENAH
0	0.94414	0.778	0.553	0	1	STAT3
0	0.882852	0.79	0.574	0	1	MDM2
0	1.12955	0.506	0.29	0	1	EEF2K
0	0.822999	0.74	0.531	0	1	HMGA1
0	1.6348	0.293	0.088	0	1	LPL
0	1.01009	0.409	0.21	0	1	APOBEC3B
0	0.717307	0.906	0.714	0	1	SMS
0	1.20464	0.384	0.194	0	1	MKI67
0	1.21566	0.929	0.742	0	1	RUNX1
0	1.36	0.355	0.171	0	1	DCLK1
0	0.942783	0.452	0.273	0	1	HOOK2
0	0.60635	0.736	0.565	0	1	TRAPPC3
0	1.08421	0.395	0.225	0	1	RTKN2
0	0.674369	0.498	0.331	0	1	CDC20
0	0.648701	0.591	0.425	0	1	CCNB1
0	0.628108	0.563	0.406	0	1	JUP
0	0.269157	0.801	0.645	0	1	TPD52
0	0.967184	0.474	0.32	0	1	ACTG2
0	0.903659	0.488	0.336	0	1	MYO5B
0	0.302409	0.982	0.835	0	1	CD24
0	0.68586	0.407	0.267	0	1	OCIAD2
0	0.895582	0.28	0.141	0	1	AR
0	0.423523	0.658	0.523	0	1	LARS
0	0.781342	0.345	0.21	0	1	KARS
0	0.620794	0.425	0.294	0	1	TFAP2A
0	1.72298	0.174	0.046	0	1	STC1
0	0.888239	0.301	0.18	0	1	THAP2
0	1.24609	0.209	0.098	0	1	C2orf42
0	0.944452	0.252	0.153	0	1	AURKB
0	1.77561	0.087	0.028	0	1	UnassignedCodeword-0122
0	2.12808	0.075	0.019	0	1	DNAAF1
1.27801e-301	0.210279	0.81	0.618	6.91404e-299	1	LDHB
1.5287e-284	0.187973	0.526	0.381	8.27025e-282	1	S100A4
5.09835e-283	0.333844	0.709	0.6	2.75821e-280	1	CCDC6
3.93483e-225	0.372255	0.434	0.335	2.12874e-222	1	SVIL
7.10606e-224	0.244248	0.765	0.652	3.84438e-221	1	CTTN
1.54024e-218	1.24128	0.059	0.023	8.3327e-216	1	TAC1
4.85508e-218	0.697233	0.221	0.146	2.6266e-215	1	PTRHD1
4.77961e-189	0.860691	0.113	0.062	2.58577e-186	1	APOBEC3A
1.65319e-188	0.469807	0.365	0.283	8.94374e-186	1	TRAF4
2.31249e-165	0.257749	0.595	0.482	1.25106e-162	1	CDH1
2.18683e-150	0.635347	0.24	0.176	1.18307e-147	1	C6orf132
7.80899e-143	0.814794	0.07	0.036	4.22466e-140	1	CLIC6
7.97776e-137	0.31852	0.309	0.235	4.31597e-134	1	ANKRD28
2.71841e-133	0.697516	0.084	0.047	1.47066e-130	1	ANKRD29
8.17099e-120	0.218509	0.348	0.269	4.42051e-117	1	CCNA2
7.3718e-117	0.129609	0.16	0.108	3.98814e-114	1	PDK4
6.62701e-106	0.80255	0.104	0.067	3.58521e-103	1	OXTR
1.00897e-103	0.206537	0.631	0.564	5.45853e-101	1	CREBBP
1.07413e-93	0.297956	0.353	0.291	5.81103e-91	1	PELI1
1.53413e-83	0.162708	0.518	0.448	8.29965e-81	1	QARS
3.69506e-63	0.5244	0.062	0.039	1.99903e-60	1	AKR1C3
2.659e-48	0.219424	0.262	0.222	1.43852e-45	1	TIFA
2.73771e-46	0.142944	0.432	0.384	1.4811e-43	1	SLC5A6
5.4088e-37	0.581985	0.073	0.054	2.92616e-34	1	CTH
1.54675e-32	0.171159	0.346	0.313	8.36791e-30	1	DNTTIP1
2.00335e-26	0.34778	0.033	0.022	1.08381e-23	1	FCER1A
1.7471e-17	0.549649	0.022	0.014	9.4518e-15	1	CEACAM8
2.00672e-12	0.657344	0.012	0.007	1.08564e-09	1	UCP1
1.24939e-07	0.260551	0.057	0.05	6.75922e-05	1	HPX
0	4.53003	0.964	0.081	0	2	MUC6
0	4.0025	0.958	0.094	0	2	S100A8
0	4.21666	0.946	0.091	0	2	ANKRD30A
0	4.22299	0.875	0.071	0	2	FOXA1
0	4.39353	0.879	0.081	0	2	MLPH
0	3.74476	0.699	0.096	0	2	SERHL2
0	2.77376	0.908	0.34	0	2	GATA3
0	2.87821	0.941	0.394	0	2	FASN
0	3.89616	0.575	0.045	0	2	PIGR
0	3.75579	0.589	0.068	0	2	SCGB2A1
0	2.03309	0.718	0.227	0	2	FCGR3A
0	2.31091	0.928	0.449	0	2	CD9
0	2.42187	0.989	0.523	0	2	TACSTD2
0	2.1266	0.723	0.286	0	2	SCD
0	1.7939	0.858	0.426	0	2	ADAM9
0	1.44495	0.664	0.268	0	2	SLPI
0	1.58897	0.883	0.493	0	2	ERBB2
0	2.30429	0.491	0.114	0	2	AR
0	1.91426	0.515	0.153	0	2	MAP3K8
0	4.15244	0.347	0.021	0	2	ABCC11
0	1.41088	0.9	0.583	0	2	NFKBIA
0	1.8015	0.981	0.673	0	2	KRT8
0	2.15689	0.387	0.081	0	2	C15orf48
0	1.18955	0.561	0.278	0	2	TFAP2A
0	0.806218	0.746	0.464	0	2	CDH1
0	0.593339	0.873	0.597	0	2	VEGFA
0	1.09941	0.571	0.299	0	2	SDC4
0	1.19108	0.906	0.635	0	2	TPD52
0	1.02136	0.687	0.425	0	2	QARS
0	1.03259	0.975	0.72	0	2	EPCAM
0	0.9688	0.985	0.735	0	2	KRT7
0	3.69706	0.273	0.027	0	2	AGR3
0	1.05586	0.805	0.565	0	2	TMEM147
0	0.823365	0.558	0.331	0	2	MYO5B
0	0.821567	0.511	0.292	0	2	LYPD3
0	0.315423	0.749	0.554	0	2	WEE1
0	0.618973	0.561	0.367	0	2	SLC5A6
0	0.919482	0.397	0.219	0	2	USP53
0	0.645595	0.898	0.721	0	2	SMS
0	2.54077	0.207	0.031	0	2	RORC
0	0.468464	0.613	0.445	0	2	RB1
0	1.59209	0.214	0.05	0	2	NOSTRIN
0	1.47415	0.997	0.838	0	2	CD24
0	0.677588	0.427	0.276	0	2	TRAF4
0	0.823474	0.304	0.169	0	2	C6orf132
0	0.436984	0.183	0.056	0	2	MZB1
0	2.09437	0.154	0.036	0	2	HPX
0	0.551231	0.877	0.768	0	2	MAPK1
0	2.5924	0.053	0.007	0	2	LRG1
6.57633e-291	0.143142	0.875	0.756	3.5578e-288	2	RUNX1
3.31757e-274	0.237037	0.504	0.345	1.7948e-271	2	VOPP1
1.05537e-267	0.305205	0.773	0.655	5.70956e-265	2	CTTN
5.80475e-261	0.466447	0.403	0.278	3.14037e-258	2	TRIB1
7.38906e-183	0.391155	0.076	0.033	3.99748e-180	2	EGFL7
1.03019e-172	0.281105	0.708	0.604	5.57332e-170	2	CCDC6
2.61827e-167	0.240079	0.158	0.092	1.41649e-164	2	DUSP5
1.71969e-137	0.17272	0.62	0.501	9.30354e-135	2	ZNF562
3.31776e-106	0.535185	0.078	0.043	1.79491e-103	2	HK3
1.00272e-94	0.602845	0.062	0.033	5.42474e-92	2	AQP3
3.10447e-92	0.174321	0.515	0.418	1.67952e-89	2	JUP
1.00222e-81	0.215265	0.394	0.314	5.42201e-79	2	EEF2K
2.59904e-29	0.130513	0.188	0.154	1.40608e-26	2	DAPK3
7.26546e-10	0.219847	0.035	0.027	3.93061e-07	2	CEACAM6
0	3.86885	0.818	0.116	0	3	CD3E
0	3.75214	0.822	0.131	0	3	TRAC
0	3.01023	0.866	0.214	0	3	PTPRC
0	3.20276	0.657	0.116	0	3	IL2RG
0	3.60196	0.597	0.093	0	3	CCL5
0	3.65997	0.563	0.089	0	3	IL7R
0	3.88249	0.523	0.059	0	3	CD247
0	3.96603	0.519	0.063	0	3	GZMA
0	3.61779	0.576	0.13	0	3	CD8A
0	3.87741	0.498	0.053	0	3	CD3G
0	2.20788	0.665	0.242	0	3	CXCL9
0	1.7677	0.656	0.279	0	3	CD4
0	2.83873	0.448	0.087	0	3	CYTIP
0	1.56241	0.695	0.343	0	3	LYZ
0	3.86271	0.334	0.037	0	3	NKG7
0	2.74437	0.367	0.078	0	3	SELL
0	1.98463	0.448	0.165	0	3	SERPINB9
0	2.06957	0.456	0.179	0	3	ADGRE5
0	2.00538	0.482	0.205	0	3	LPXN
0	2.3939	0.387	0.116	0	3	GPR183
0	3.64712	0.312	0.041	0	3	TIGIT
0	1.94796	0.384	0.117	0	3	SLAMF7
0	3.70574	0.29	0.036	0	3	CCR7
0	2.86704	0.294	0.06	0	3	SLAMF1
0	0.957866	0.56	0.329	0	3	ZEB2
0	3.26395	0.259	0.037	0	3	CD27
0	3.61336	0.247	0.03	0	3	PRF1
0	0.98865	0.521	0.306	0	3	FCER1G
0	2.91979	0.255	0.043	0	3	LTB
0	0.800179	0.548	0.342	0	3	LUM
0	1.22653	0.505	0.3	0	3	TGFB1
0	1.19205	0.42	0.215	0	3	FGL2
0	1.13867	0.586	0.381	0	3	S100A4
0	3.06317	0.251	0.05	0	3	CD69
0	1.26347	0.414	0.213	0	3	AIF1
0	2.01825	0.316	0.117	0	3	IDO1
0	2.60104	0.281	0.083	0	3	TCF7
0	2.82654	0.241	0.048	0	3	RHOH
0	1.34077	0.655	0.464	0	3	ATM
0	3.09037	0.25	0.061	0	3	CTLA4
0	3.42461	0.212	0.032	0	3	CXCR6
0	1.18032	0.603	0.43	0	3	CXCR4
0	3.19253	0.206	0.039	0	3	KLRB1
0	3.37714	0.195	0.04	0	3	KLRC1
0	0.342106	0.485	0.332	0	3	COL6A3
0	3.32401	0.193	0.042	0	3	KLRD1
0	0.836364	0.43	0.283	0	3	CD68
0	1.3482	0.492	0.348	0	3	SMAP2
0	1.04524	0.609	0.468	0	3	FAM107B
0	3.10895	0.189	0.049	0	3	FOXP3
0	1.15102	0.312	0.173	0	3	HAVCR2
0	4.30278	0.157	0.02	0	3	GNLY
0	0.922299	0.309	0.174	0	3	C1QC
0	1.01758	0.277	0.144	0	3	C1QA
0	0.818837	0.374	0.249	0	3	CCDC80
0	2.20516	0.196	0.077	0	3	DUSP2
0	1.25714	0.252	0.133	0	3	PRDM1
0	1.0692	0.363	0.25	0	3	TMEM173
0	0.833308	0.465	0.355	0	3	GLIPR1
0	1.06774	0.255	0.145	0	3	IGSF6
0	1.21717	0.219	0.11	0	3	SFRP4
0	2.1996	0.172	0.067	0	3	LAG3
0	1.09238	0.22	0.12	0	3	MNDA
0	1.80614	0.166	0.072	0	3	TNF
0	1.87866	0.117	0.038	0	3	GZMB
0	1.61805	0.124	0.045	0	3	CCR2
0	2.2613	0.091	0.027	0	3	IL2RA
0	3.39128	0.027	0.003	0	3	GZMK
0	0.790054	0.999	0.99	0	3	B2M
2.71595e-305	0.903081	0.441	0.356	1.46933e-302	3	VOPP1
2.10979e-293	1.11568	0.198	0.109	1.1414e-290	3	CD86
1.23419e-276	2.28965	0.067	0.022	6.67694e-274	3	IFNG
3.93019e-273	1.29376	0.147	0.074	2.12623e-270	3	DPT
1.11258e-272	0.174296	0.29	0.178	6.01904e-270	3	PECAM1
3.74158e-271	0.727756	0.28	0.179	2.02419e-268	3	CD14
7.13482e-270	0.365378	0.456	0.336	3.85994e-267	3	POSTN
2.37844e-267	0.539787	0.667	0.669	1.28674e-264	3	TOMM7
8.20749e-266	2.70199	0.036	0.008	4.44025e-263	3	PDCD1
1.32363e-262	2.55652	0.073	0.026	7.16083e-260	3	KLRF1
4.06625e-258	0.374413	0.6	0.533	2.19984e-255	3	ACTA2
2.06458e-235	0.562516	0.085	0.034	1.11694e-232	3	MS4A1
5.90013e-234	0.483417	0.35	0.249	3.19197e-231	3	CXCL12
7.18907e-232	0.657985	0.267	0.174	3.88928e-229	3	CD163
5.7484e-223	0.789988	0.261	0.172	3.10989e-220	3	ZEB1
1.00523e-213	1.09806	0.105	0.05	5.4383e-211	3	PTGDS
1.44549e-199	1.79757	0.076	0.032	7.82012e-197	3	AQP3
1.61635e-194	1.36915	0.105	0.052	8.74443e-192	3	PDCD1LG2
7.38553e-191	0.671285	0.269	0.184	3.99557e-188	3	ADAM12
5.63483e-159	0.96776	0.302	0.241	3.04844e-156	3	PIM1
7.64081e-158	0.834754	0.185	0.119	4.13368e-155	3	ITGAX
1.17643e-147	0.41424	0.31	0.23	6.36451e-145	3	MMP2
5.53157e-142	0.278677	0.661	0.586	2.99258e-139	3	PTEN
1.97957e-140	1.36868	0.127	0.077	1.07095e-137	3	CD274
6.25583e-139	1.69128	0.059	0.026	3.38441e-136	3	CD80
1.58584e-127	0.549413	0.485	0.468	8.5794e-125	3	WARS
1.06069e-118	0.793508	0.207	0.15	5.73834e-116	3	APOC1
2.83856e-112	0.754103	0.129	0.08	1.53566e-109	3	LRRC15
1.30766e-104	0.82182	0.284	0.236	7.07445e-102	3	APOBEC3B
5.44334e-91	1.29723	0.062	0.033	2.94485e-88	3	CLECL1
7.77849e-91	0.280822	0.279	0.215	4.20816e-88	3	FAP
1.71839e-87	0.894718	0.114	0.074	9.29648e-85	3	ITGAM
1.10922e-84	0.812726	0.088	0.053	6.00088e-82	3	CCL8
8.40952e-84	0.968823	0.098	0.061	4.54955e-81	3	SPIB
5.30188e-74	0.821478	0.108	0.072	2.86832e-71	3	IGF1
9.6015e-73	0.507529	0.074	0.044	5.19441e-70	3	BANK1
1.23437e-65	0.105435	0.294	0.397	6.67793e-63	3	CDKN1A
8.79815e-64	0.689664	0.35	0.336	4.7598e-61	3	ERN1
1.65683e-38	0.378813	0.479	0.49	8.96347e-36	3	CDC25B
1.13542e-27	0.178178	0.18	0.234	6.14264e-25	3	TIFA
1.00893e-26	0.826287	0.042	0.028	5.45828e-24	3	CD79B
3.30442e-23	1.39184	0.013	0.007	1.78769e-20	3	UnassignedCodeword-0445
3.49127e-22	0.774778	0.111	0.093	1.88878e-19	3	PDE4A
1.07624e-21	0.473825	0.128	0.107	5.82247e-19	3	MRC1
1.26405e-20	0.207563	0.493	0.496	6.8385e-18	3	ITM2C
1.99467e-19	0.384873	0.168	0.152	1.07912e-16	3	TENT5C
1.10057e-13	0.339907	0.395	0.412	5.95409e-11	3	TUBA4A
6.28555e-12	0.928968	0.015	0.01	3.40048e-09	3	TPSAB1
2.20308e-11	0.745416	0.124	0.114	1.19187e-08	3	FAM49A
5.92314e-11	0.277294	0.039	0.03	3.20442e-08	3	CD79A
5.9673e-11	0.145069	0.57	0.605	3.22831e-08	3	CD47
2.38255e-09	0.430954	0.033	0.025	1.28896e-06	3	TCL1A
1.17084e-08	0.635078	0.046	0.038	6.33426e-06	3	LY86
4.77222e-08	0.840875	0.231	0.237	2.58177e-05	3	CD83
5.53084e-08	0.995383	0.02	0.015	2.99218e-05	3	CLEC9A
6.17585e-07	0.745677	0.107	0.099	0.000334113	3	DUSP5
1.42225e-06	0.17479	0.069	0.081	0.000769435	3	ALDH1A3
2.35091e-06	0.132669	0.398	0.474	0.00127184	3	RB1
2.27672e-05	0.2648	0.035	0.043	0.0123171	3	CXCL5
0.00100596	0.159181	0.554	0.629	0.544224	3	HIF1A
0.00161396	0.142707	0.206	0.23	0.87315	3	PDGFRA
0	2.96704	0.832	0.307	0	4	LUM
0	2.41638	0.771	0.297	0	4	COL6A3
0	2.91799	0.66	0.187	0	4	MMP2
0	2.49712	0.764	0.298	0	4	POSTN
0	2.53295	0.645	0.216	0	4	CCDC80
0	2.68471	0.603	0.176	0	4	FAP
0	1.78642	0.714	0.31	0	4	ZEB2
0	2.48703	0.616	0.217	0	4	CXCL12
0	2.31146	0.68	0.287	0	4	FCER1G
0	2.51148	0.53	0.152	0	4	ADAM12
0	1.96409	0.52	0.155	0	4	PDGFRB
0	2.18714	0.705	0.342	0	4	LYZ
0	2.30113	0.622	0.26	0	4	CD68
0	2.59346	0.499	0.15	0	4	C1QC
0	2.71583	0.468	0.121	0	4	C1QA
0	2.70863	0.495	0.153	0	4	CD14
0	1.89124	0.619	0.284	0	4	CD4
0	2.16758	0.528	0.199	0	4	AIF1
0	3.50718	0.375	0.05	0	4	LRRC15
0	2.59988	0.474	0.149	0	4	CD163
0	2.249	0.523	0.203	0	4	FGL2
0	3.00631	0.398	0.088	0	4	SFRP4
0	1.91288	0.785	0.511	0	4	ACTA2
0	1.5129	0.515	0.26	0	4	CXCL9
0	1.91792	0.399	0.163	0	4	HAVCR2
0	2.10416	0.437	0.201	0	4	PDGFRA
0	0.726196	0.491	0.261	0	4	PTPRC
0	1.98862	0.445	0.22	0	4	CRISPLD2
0	1.32045	0.484	0.266	0	4	FCGR3A
0	2.0614	0.347	0.134	0	4	IGSF6
0	2.15944	0.301	0.096	0	4	CD86
0	2.10289	0.312	0.109	0	4	MNDA
0	2.15059	0.298	0.105	0	4	ITGAX
0	1.06423	0.572	0.383	0	4	S100A4
0	1.32552	0.349	0.162	0	4	ZEB1
0	0.977729	0.486	0.303	0	4	TGFB1
0	2.37334	0.271	0.09	0	4	MRC1
0	1.41982	0.463	0.291	0	4	FBLN1
0	2.31386	0.235	0.063	0	4	DPT
0	0.608391	0.74	0.576	0	4	PTEN
0	0.734548	0.409	0.253	0	4	TCF4
0	0.372211	0.325	0.174	0	4	PECAM1
0	2.24967	0.21	0.062	0	4	ITGAM
0	1.71313	0.253	0.108	0	4	GFPT2
0	1.0972	0.486	0.347	0	4	MYLK
0	1.6493	0.277	0.141	0	4	APOC1
0	1.82489	0.224	0.088	0	4	C5orf46
0	2.10789	0.193	0.062	0	4	IGF1
0	0.819528	0.478	0.354	0	4	GLIPR1
0	2.57238	0.165	0.043	0	4	CCL8
0	2.24398	0.166	0.044	0	4	PDCD1LG2
0	1.00078	0.249	0.134	0	4	PRDM1
0	0.865311	0.298	0.184	0	4	SERPINB9
0	0.772679	0.464	0.353	0	4	VOPP1
0	1.02792	0.242	0.135	0	4	SLAMF7
0	1.23942	0.232	0.128	0	4	IDO1
0	1.57419	0.144	0.042	0	4	MYH11
0	1.62442	0.131	0.047	0	4	PTGDS
0	2.26215	0.121	0.038	0	4	HK3
0	1.81042	0.093	0.032	0	4	LY86
0	0.875497	0.997	0.99	0	4	B2M
9.99757e-280	0.774112	0.361	0.25	5.40868e-277	4	TMEM173
3.02276e-273	1.25987	0.165	0.086	1.63532e-270	4	PDE4A
2.01151e-262	0.457454	0.201	0.11	1.08823e-259	4	CD93
3.57672e-254	1.62368	0.078	0.029	1.935e-251	4	IL2RA
2.57862e-240	0.442665	0.272	0.172	1.39503e-237	4	CAV1
1.59922e-222	0.71878	0.522	0.463	8.65178e-220	4	WARS
3.11168e-206	0.512585	0.568	0.494	1.68342e-203	4	BASP1
1.13515e-192	1.55746	0.065	0.025	6.14117e-190	4	CD80
5.02836e-102	0.58343	0.265	0.202	2.72034e-99	4	ADGRE5
2.47494e-92	0.32218	0.525	0.476	1.33894e-89	4	ADAM9
9.12146e-90	1.76608	0.058	0.03	4.93471e-87	4	MMP1
7.31695e-88	1.0929	0.062	0.033	3.95847e-85	4	CLECL1
1.427e-81	0.751822	0.318	0.277	7.72009e-79	4	CXCL16
1.88085e-81	2.75108	0.024	0.008	1.01754e-78	4	TPSAB1
2.09917e-81	1.0804	0.117	0.078	1.13565e-78	4	CD274
3.8439e-68	0.459911	0.188	0.14	2.07955e-65	4	GPR183
3.18639e-62	0.723573	0.101	0.068	1.72384e-59	4	HOXD8
4.99603e-55	0.969901	0.048	0.028	2.70285e-52	4	PGR
1.90568e-52	0.420002	0.46	0.45	1.03097e-49	4	CCPG1
1.72908e-50	0.895502	0.149	0.116	9.35433e-48	4	FSTL3
1.06666e-45	1.05644	0.044	0.026	5.77065e-43	4	TCEAL7
7.05609e-45	0.757446	0.143	0.111	3.81734e-42	4	FAM49A
1.37179e-41	0.172498	0.183	0.243	7.42141e-39	4	CD83
2.97049e-30	0.795061	0.071	0.051	1.60703e-27	4	CCR2
2.17979e-29	1.12082	0.056	0.039	1.17926e-26	4	CX3CR1
3.43229e-24	0.385908	0.257	0.233	1.85687e-21	4	LPXN
9.14824e-22	0.833375	0.04	0.027	4.9492e-19	4	IL6
7.39998e-21	0.740439	0.051	0.037	4.00339e-18	4	ESR1
3.07294e-20	0.687042	0.054	0.039	1.66246e-17	4	CLIC6
1.2958e-19	0.370231	0.452	0.468	7.01027e-17	4	RB1
6.02754e-18	0.189447	0.018	0.03	3.2609e-15	4	TAC1
1.22252e-15	0.104863	0.301	0.356	6.61382e-13	4	SVIL
1.5141e-15	2.32488	0.013	0.008	8.19127e-13	4	CTSG
1.26087e-14	2.17191	0.032	0.023	6.82131e-12	4	CPA3
4.48532e-13	0.623679	0.092	0.078	2.42656e-10	4	ALDH1A3
4.75272e-13	1.01373	0.012	0.007	2.57122e-10	4	UnassignedCodeword-0445
5.45249e-12	0.138772	0.201	0.234	2.9498e-09	4	KARS
6.26767e-07	0.155898	0.345	0.344	0.000339081	4	ACTG2
7.17513e-07	0.234823	0.018	0.024	0.000388174	4	FCER1A
1.20789e-05	0.183224	0.611	0.676	0.00653466	4	TOMM7
4.52964e-05	0.13651	0.081	0.091	0.0245053	4	PPARG
6.51819e-05	0.191963	0.57	0.627	0.0352634	4	HIF1A
0.00010071	0.113413	0.09	0.101	0.0544843	4	DUSP5
0.00138732	0.123827	0.017	0.02	0.75054	4	SSTR2
0.00182338	1.02872	0.018	0.015	0.986447	4	CLEC9A
0.00511923	0.342408	0.2	0.199	1	4	DCLK1
0	1.23959	0.941	0.448	0	5	KRT14
0	2.56077	0.617	0.169	0	5	KRT23
0	1.77345	0.767	0.327	0	5	SERPINA3
0	1.24714	0.837	0.401	0	5	SFRP1
0	1.68602	0.796	0.368	0	5	FOXC1
0	1.93841	0.671	0.292	0	5	KIT
0	2.1437	0.653	0.274	0	5	SH3YL1
0	1.89477	0.598	0.23	0	5	EGFR
0	0.13678	0.852	0.488	0	5	KRT5
0	0.787702	0.954	0.604	0	5	DSP
0	0.366691	0.895	0.555	0	5	TACSTD2
0	1.16753	0.692	0.378	0	5	S100A4
0	1.70059	0.509	0.224	0	5	ANKRD28
0	0.917591	0.941	0.656	0	5	DSC2
0	2.48072	0.362	0.08	0	5	C5orf46
0	1.29574	0.518	0.26	0	5	CXCL16
0	1.41066	0.487	0.251	0	5	S100A14
0	1.77352	0.398	0.168	0	5	CDC42EP1
0	0.563654	0.963	0.734	0	5	EPCAM
0	1.03668	0.66	0.432	0	5	CCPG1
0	1.08681	0.577	0.349	0	5	GLIPR1
0	1.12583	0.639	0.412	0	5	JUP
0	0.315929	0.961	0.75	0	5	KRT7
0	0.58558	0.842	0.634	0	5	CCND1
0	0.86899	0.791	0.584	0	5	CD47
0	1.03359	0.924	0.728	0	5	SMS
0	0.851582	0.876	0.682	0	5	ENAH
0	0.523494	0.826	0.632	0	5	LDHB
0	0.901211	0.506	0.323	0	5	ERN1
0	1.0792	0.483	0.3	0	5	TFAP2A
0	0.817724	0.503	0.327	0	5	SCD
0	0.781256	0.571	0.396	0	5	TUBA4A
0	0.834878	0.54	0.368	0	5	CENPF
0	0.766869	0.607	0.438	0	5	CCNB1
0	0.993381	0.444	0.276	0	5	OCIAD2
0	0.819268	0.597	0.429	0	5	SQLE
0	1.90337	0.239	0.085	0	5	DMKN
0	0.720241	0.373	0.224	0	5	CD83
0	0.236058	0.993	0.846	0	5	CD24
0	0.657493	0.725	0.58	0	5	TRAPPC3
0	0.90386	0.379	0.236	0	5	PIM1
0	1.0873	0.296	0.154	0	5	CCNE1
0	0.641838	0.515	0.374	0	5	CDKN1A
0	0.55032	0.618	0.478	0	5	CDC25B
0	0.567659	0.708	0.578	0	5	STAT3
0	1.7699	0.193	0.07	0	5	ALDH1A3
1.60836e-294	0.660747	0.476	0.339	8.70123e-292	5	SVIL
2.09243e-294	0.614945	0.749	0.622	1.13201e-291	5	VEGFA
8.16527e-287	0.777949	0.447	0.308	4.41741e-284	5	SLPI
1.66514e-264	0.510302	0.331	0.198	9.00841e-262	5	ADGRE5
3.88475e-238	0.407751	0.759	0.662	2.10165e-235	5	CTTN
1.21349e-217	0.855587	0.288	0.184	6.565e-215	5	LGALSL
3.18715e-208	0.429442	0.66	0.556	1.72425e-205	5	HMGA1
5.49775e-201	0.302588	0.836	0.777	2.97428e-198	5	MAPK1
3.55727e-181	0.855931	0.195	0.113	1.92448e-178	5	FSTL3
4.29153e-181	0.297185	0.7	0.568	2.32172e-178	5	WEE1
2.95911e-177	0.436225	0.582	0.467	1.60088e-174	5	BACE2
2.90669e-172	0.122149	0.636	0.484	1.57252e-169	5	ITM2C
2.4115e-162	0.848893	0.235	0.151	1.30462e-159	5	DAPK3
5.42252e-160	1.15612	0.087	0.038	2.93359e-157	5	AKR1C3
7.27768e-157	1.35531	0.086	0.038	3.93723e-154	5	CXCL5
1.8507e-154	0.168853	0.745	0.581	1.00123e-151	5	PTEN
6.53847e-150	0.319112	0.471	0.356	3.53731e-147	5	VOPP1
1.13579e-134	0.602451	0.135	0.074	6.14463e-132	5	LAG3
3.78103e-134	0.580533	0.402	0.313	2.04554e-131	5	LYPD3
4.4615e-131	0.280109	0.68	0.57	2.41367e-128	5	FLNB
3.00181e-125	0.351353	0.493	0.397	1.62398e-122	5	E2F3
3.19269e-120	0.227607	0.667	0.581	1.72725e-117	5	DST
1.57534e-119	0.351857	0.054	0.021	8.52261e-117	5	CPA3
8.85418e-118	0.302675	0.595	0.509	4.79011e-115	5	ZNF562
6.17945e-111	0.267899	0.637	0.534	3.34308e-108	5	SRPK1
3.86424e-106	0.69685	0.183	0.119	2.09056e-103	5	GFPT2
1.25648e-102	0.694519	0.248	0.181	6.79757e-100	5	C6orf132
5.51963e-95	0.53178	0.266	0.196	2.98612e-92	5	STXBP4
2.92322e-93	0.376072	0.431	0.35	1.58146e-90	5	CDC20
4.29115e-90	0.182279	0.942	0.91	2.32151e-87	5	PKM
1.34842e-85	0.249676	0.59	0.492	7.29496e-83	5	CDH1
1.15828e-77	0.861041	0.099	0.059	6.26631e-75	5	FOXC2
6.87924e-77	0.467347	0.209	0.15	3.72167e-74	5	AKR1C1
1.69462e-76	0.139989	0.59	0.495	9.1679e-74	5	BASP1
1.82998e-73	0.546971	0.397	0.34	9.9002e-71	5	ACTG2
5.2655e-72	0.412757	0.444	0.387	2.84864e-69	5	SLC5A6
7.90348e-69	0.420215	0.11	0.068	4.27578e-66	5	HOXD8
1.11429e-60	0.400623	0.296	0.237	6.0283e-58	5	APOBEC3B
1.53155e-52	0.716817	0.064	0.037	8.28571e-50	5	ESR1
4.7954e-45	0.815869	0.048	0.027	2.59431e-42	5	CEACAM6
2.72194e-38	0.413491	0.077	0.051	1.47257e-35	5	ANKRD29
6.11322e-38	0.259664	0.381	0.33	3.30725e-35	5	MASTL
1.69522e-35	0.298917	0.372	0.331	9.17112e-33	5	SDC4
1.83851e-35	0.139817	0.638	0.591	9.94633e-33	5	TMEM147
1.30858e-31	0.338315	0.349	0.315	7.07943e-29	5	DNTTIP1
1.18238e-28	0.25354	0.336	0.298	6.39666e-26	5	HOOK2
1.86849e-23	0.197045	0.237	0.202	1.01085e-20	5	CDC14B
1.45965e-22	0.777412	0.026	0.015	7.89671e-20	5	CEACAM8
1.35099e-21	0.125603	0.105	0.081	7.30887e-19	5	TNF
2.23818e-20	0.230276	0.259	0.228	1.21086e-17	5	KARS
1.53368e-16	0.371997	0.04	0.028	8.29721e-14	5	TAC1
1.24786e-15	0.26054	0.224	0.201	6.7509e-13	5	RAB30
1.51214e-15	0.118688	0.587	0.574	8.18066e-13	5	CREBBP
2.29619e-14	0.126094	0.458	0.437	1.24224e-11	5	SEC24A
8.62752e-14	0.443213	0.033	0.023	4.66749e-11	5	FCER1A
6.17015e-12	0.366408	0.084	0.069	3.33805e-09	5	APOBEC3A
9.56131e-12	0.378923	0.087	0.072	5.17267e-09	5	OXTR
1.37299e-08	0.575626	0.034	0.026	7.42787e-06	5	MMP12
1.06858e-07	0.163108	0.472	0.469	5.78103e-05	5	WARS
1.56689e-05	0.188238	0.013	0.009	0.0084769	5	OPRPN
0.000950588	0.160007	0.247	0.241	0.514268	5	USP53
0	4.57567	0.733	0.078	0	6	CD93
0	3.82536	0.773	0.143	0	6	CAV1
0	3.94289	0.774	0.152	0	6	PECAM1
0	5.90399	0.654	0.04	0	6	VWF
0	6.16655	0.594	0.024	0	6	CLEC14A
0	4.79927	0.591	0.056	0	6	RAMP2
0	3.00319	0.679	0.163	0	6	PDGFRB
0	4.42855	0.555	0.076	0	6	KDR
0	5.5974	0.484	0.022	0	6	MMRN2
0	2.52569	0.608	0.153	0	6	ZEB1
0	2.1624	0.703	0.253	0	6	AQP1
0	1.78023	0.758	0.327	0	6	ZEB2
0	5.31037	0.441	0.02	0	6	ANGPT2
0	1.48046	0.743	0.323	0	6	COL6A3
0	1.82271	0.634	0.245	0	6	TCF4
0	1.69729	0.685	0.299	0	6	TGFB1
0	1.86925	0.603	0.24	0	6	TMEM173
0	1.24621	0.681	0.327	0	6	POSTN
0	1.75453	0.69	0.34	0	6	MYLK
0	2.62084	0.442	0.101	0	6	TCIM
0	1.71501	0.852	0.52	0	6	ACTA2
0	1.225	0.526	0.202	0	6	FAP
0	0.905423	0.541	0.219	0	6	MMP2
0	5.28461	0.336	0.019	0	6	AVPR1A
0	3.30708	0.355	0.053	0	6	HOXD8
0	3.85559	0.312	0.024	0	6	IL3RA
0	2.68171	0.347	0.073	0	6	PPARG
0	3.39895	0.314	0.055	0	6	NOSTRIN
0	4.64858	0.279	0.023	0	6	EGFL7
0	1.30922	0.495	0.244	0	6	CXCL12
0	4.05524	0.279	0.028	0	6	SOX17
0	0.874009	0.827	0.579	0	6	PTEN
0	5.83123	0.246	0.006	0	6	SOX18
0	1.25895	0.41	0.182	0	6	SERPINB9
0	1.36169	0.564	0.336	0	6	SVIL
0	0.535452	0.472	0.248	0	6	CCDC80
0	0.239225	0.57	0.351	0	6	LUM
0	1.53403	0.352	0.133	0	6	PRDM1
0	1.03515	0.381	0.181	0	6	ADAM12
0	4.99097	0.207	0.016	0	6	ESM1
0	4.22931	0.21	0.019	0	6	HOXD9
0	1.11305	0.793	0.609	0	6	HIF1A
0	3.84996	0.204	0.021	0	6	RAPGEF3
0	2.94641	0.213	0.056	0	6	STC1
0	0.782668	0.611	0.456	0	6	RB1
0	2.59436	0.196	0.048	0	6	SNAI1
0	1.10114	0.38	0.235	0	6	CRISPLD2
0	1.33326	0.216	0.093	0	6	DUSP5
0	3.67357	0.114	0.01	0	6	CAVIN2
0	2.62969	0.151	0.047	0	6	MYH11
0	2.04547	0.134	0.047	0	6	ANKRD29
0	2.34135	0.102	0.029	0	6	MMP1
0	0.426052	0.999	0.99	0	6	B2M
5.55204e-232	2.15589	0.063	0.017	3.00365e-229	6	SSTR2
6.96338e-206	1.19068	0.211	0.114	3.76719e-203	6	LPL
2.05363e-200	0.863405	0.486	0.379	1.11101e-197	6	CDKN1A
1.82347e-182	0.852329	0.203	0.11	9.86495e-180	6	PDK4
2.25918e-179	1.68028	0.126	0.058	1.22221e-176	6	FOXC2
1.64602e-166	1.12354	0.117	0.053	8.90496e-164	6	CCL8
2.07135e-161	1.35285	0.094	0.039	1.1206e-158	6	AKR1C3
1.04773e-150	0.38948	0.736	0.665	5.66823e-148	6	CTTN
7.36546e-149	0.747032	0.293	0.193	3.98472e-146	6	DCLK1
2.5008e-140	0.99869	0.164	0.09	1.35293e-137	6	PDE4A
1.95804e-124	0.47455	0.534	0.445	1.0593e-121	6	CCPG1
2.93752e-118	0.831845	0.233	0.153	1.5892e-115	6	DAPK3
3.36148e-113	1.38202	0.063	0.025	1.81856e-110	6	TCEAL7
9.50135e-111	0.320486	0.578	0.475	5.14023e-108	6	ADAM9
1.11066e-95	0.467701	0.29	0.204	6.00865e-93	6	ADGRE5
3.60116e-90	0.297896	0.712	0.666	1.94823e-87	6	TOMM7
2.30641e-89	0.755864	0.1	0.053	1.24777e-86	6	PTGDS
1.68368e-87	0.455636	0.532	0.465	9.10872e-85	6	WARS
1.00068e-84	1.19136	0.12	0.071	5.41367e-82	6	NDUFA4L2
3.61794e-74	1.63531	0.057	0.027	1.9573e-71	6	IL6
4.1468e-73	1.01641	0.059	0.028	2.24342e-70	6	PGR
1.30113e-63	0.624101	0.165	0.111	7.03909e-61	6	FAM49A
1.11956e-59	0.265933	0.438	0.36	6.05683e-57	6	VOPP1
8.57478e-58	0.342473	0.355	0.284	4.63896e-55	6	CXCL9
3.90782e-53	0.246847	0.633	0.585	2.11413e-50	6	STAT3
7.68331e-47	0.33129	0.501	0.456	4.15667e-44	6	QARS
2.11975e-39	0.427835	0.277	0.228	1.14678e-36	6	KARS
3.64943e-28	0.388308	0.335	0.298	1.97434e-25	6	PELI1
1.0114e-26	0.620045	0.223	0.19	5.47168e-24	6	LGALSL
5.65851e-26	0.567502	0.106	0.078	3.06125e-23	6	ALDH1A3
1.71801e-22	0.302068	0.236	0.197	9.29445e-20	6	MAP3K8
1.31524e-16	0.320765	0.273	0.245	7.11544e-14	6	ANKRD28
2.2939e-16	0.325798	0.043	0.029	1.241e-13	6	CD79B
7.21005e-15	0.318252	0.372	0.343	3.90064e-12	6	ACTG2
2.0663e-14	0.329993	0.229	0.203	1.11787e-11	6	CDC14B
1.6216e-08	0.208482	0.629	0.623	8.77286e-06	6	NFKBIA
1.21576e-07	0.274906	0.089	0.075	6.57728e-05	6	IGF1
3.98731e-07	0.72345	0.062	0.051	0.000215713	6	TIMP4
1.21013e-06	0.237533	0.046	0.036	0.000654682	6	AQP3
0.000259349	0.728705	0.017	0.013	0.140308	6	LRG1
0.00500252	0.202407	0.192	0.186	1	6	CDC42EP1
0	2.4192	0.945	0.166	0	7	S100A8
0	2.02029	0.887	0.158	0	7	MUC6
0	2.02625	0.841	0.167	0	7	ANKRD30A
0	2.07766	0.754	0.144	0	7	FOXA1
0	1.70915	0.672	0.157	0	7	MLPH
0	1.36122	0.686	0.269	0	7	FCGR3A
0	1.40343	0.809	0.392	0	7	GATA3
0	1.51469	0.849	0.444	0	7	FASN
0	1.08603	0.953	0.564	0	7	TACSTD2
0	1.66544	0.535	0.155	0	7	SERHL2
0	1.14042	0.702	0.331	0	7	COL6A3
0	1.09175	0.577	0.221	0	7	MMP2
0	1.14744	0.686	0.332	0	7	POSTN
0	1.8177	0.425	0.097	0	7	PIGR
0	1.07586	0.786	0.465	0	7	ADAM9
0	1.06913	0.801	0.496	0	7	CD9
0	1.23495	0.897	0.609	0	7	NFKBIA
0	1.30456	0.473	0.186	0	7	MAP3K8
0	0.354348	0.634	0.35	0	7	LUM
0	1.08649	0.471	0.209	0	7	FAP
0	1.24919	0.961	0.699	0	7	KRT8
0	1.45815	0.376	0.122	0	7	SCGB2A1
0	1.10391	0.423	0.172	0	7	CD163
0	0.807833	0.569	0.33	0	7	SCD
0	1.60041	0.352	0.115	0	7	ITGAX
0	0.466605	0.52	0.288	0	7	CD68
0	1.17961	0.371	0.152	0	7	AR
0	2.29845	0.256	0.048	0	7	AGR3
0	1.25974	0.298	0.111	0	7	C15orf48
0	0.636219	0.845	0.66	0	7	TPD52
0	1.29352	0.406	0.227	0	7	CD83
0	1.06805	0.314	0.137	0	7	GPR183
0	0.978383	0.313	0.148	0	7	APOC1
0	1.3297	0.256	0.092	0	7	DUSP5
0	1.10161	0.998	0.851	0	7	CD24
0	1.33042	0.21	0.065	0	7	MZB1
0	1.25707	0.213	0.084	0	7	PPARG
0	1.32413	0.168	0.058	0	7	ABCC11
2.36273e-301	0.686043	0.364	0.184	1.27824e-298	7	ADAM12
1.97035e-293	0.627359	0.452	0.252	1.06596e-290	7	CCDC80
5.74154e-291	0.746713	0.566	0.376	3.10617e-288	7	CDKN1A
2.9045e-283	0.46825	0.533	0.312	1.57134e-280	7	TGFB1
4.25933e-281	0.955122	0.294	0.147	2.3043e-278	7	TENT5C
1.32387e-278	0.286962	0.368	0.186	7.16214e-276	7	PDGFRB
3.3748e-267	0.692739	0.513	0.325	1.82577e-264	7	SDC4
3.26741e-261	0.575747	0.251	0.115	1.76767e-258	7	SFRP4
7.02425e-254	1.12339	0.246	0.118	3.80012e-251	7	GFPT2
4.97616e-253	0.345906	0.961	0.757	2.6921e-250	7	KRT7
5.68446e-252	1.2477	0.137	0.049	3.07529e-249	7	RORC
9.36005e-252	1.33504	0.238	0.114	5.06379e-249	7	LPL
2.80232e-247	0.751094	0.337	0.181	1.51605e-244	7	HAVCR2
2.88573e-230	0.358723	0.866	0.737	1.56118e-227	7	SMS
2.57345e-221	1.12877	0.179	0.078	1.39224e-218	7	TNF
7.11236e-212	0.552251	0.612	0.451	3.84779e-209	7	QARS
1.71308e-201	0.399697	0.706	0.535	9.26775e-199	7	ERBB2
5.89618e-199	0.353323	0.865	0.778	3.18983e-196	7	MAPK1
3.20875e-193	0.675989	0.439	0.287	1.73593e-190	7	TRIB1
7.01693e-193	0.427201	0.489	0.31	3.79616e-190	7	SLPI
1.28678e-173	0.660165	0.152	0.067	6.9615e-171	7	NOSTRIN
9.81534e-170	2.10019	0.047	0.011	5.3101e-167	7	LRG1
2.82415e-151	0.509062	0.451	0.307	1.52787e-148	7	TFAP2A
1.40454e-133	0.109523	0.684	0.533	7.59855e-131	7	ACTA2
1.87806e-114	0.525129	0.395	0.275	1.01603e-111	7	CXCL16
1.98873e-111	1.16589	0.089	0.038	1.0759e-108	7	CX3CR1
5.93068e-108	0.726188	0.149	0.078	3.2085e-105	7	DPT
1.99485e-93	0.450783	0.195	0.115	1.07922e-90	7	CD86
2.93895e-93	0.705791	0.193	0.116	1.58997e-90	7	FSTL3
1.63108e-83	0.275609	0.581	0.46	8.82415e-81	7	RB1
1.84956e-82	0.172586	0.913	0.744	1.00061e-79	7	EPCAM
6.53552e-77	0.158668	0.488	0.359	3.53572e-74	7	VOPP1
1.69072e-71	0.557568	0.171	0.106	9.14681e-69	7	MRC1
8.307e-68	0.425881	0.128	0.073	4.49409e-65	7	IGF1
3.72011e-66	0.929074	0.06	0.027	2.01258e-63	7	PLD4
1.25992e-65	0.249323	0.684	0.591	6.81618e-63	7	TMEM147
3.6888e-60	1.34467	0.043	0.017	1.99564e-57	7	TNFRSF17
2.20413e-56	0.159349	0.226	0.153	1.19244e-53	7	IGSF6
4.01395e-53	0.618133	0.069	0.035	2.17155e-50	7	AQP3
7.57409e-52	0.430792	0.22	0.155	4.09758e-49	7	DAPK3
1.05803e-48	0.177675	0.753	0.665	5.72392e-46	7	CTTN
1.47965e-46	1.09862	0.043	0.02	8.0049e-44	7	ADIPOQ
7.87753e-46	0.189054	0.694	0.613	4.26174e-43	7	CCDC6
3.24347e-43	0.185962	0.266	0.196	1.75472e-40	7	DCLK1
7.09882e-43	0.676854	0.068	0.037	3.84046e-40	7	LY86
6.7445e-42	0.46302	0.305	0.241	3.64878e-39	7	CRISPLD2
1.23874e-37	0.15149	0.163	0.112	6.70156e-35	7	FAM49A
1.78952e-37	0.391548	0.117	0.076	9.6813e-35	7	ITGAM
9.92402e-36	0.262224	0.304	0.238	5.3689e-33	7	USP53
1.74539e-34	0.58354	0.065	0.038	9.44254e-32	7	ADH1B
3.7148e-30	0.12232	0.431	0.356	2.0097e-27	7	MYO5B
5.28029e-29	0.133388	0.691	0.617	2.85663e-26	7	HIF1A
1.481e-26	0.526438	0.047	0.027	8.0122e-24	7	TCEAL7
6.80407e-18	0.363777	0.072	0.05	3.681e-15	7	HPX
6.36606e-16	0.230937	0.284	0.245	3.44404e-13	7	PIM1
7.57524e-12	0.148384	0.041	0.028	4.0982e-09	7	IL6
9.40592e-08	0.10484	0.107	0.089	5.08861e-05	7	DUSP2
0	1.51742	0.944	0.296	0	8	KRT6B
0	1.77271	0.873	0.237	0	8	MYBPC1
0	1.02827	0.95	0.473	0	8	KRT14
0	1.27394	0.975	0.503	0	8	KRT5
0	1.09915	0.83	0.367	0	8	LYZ
0	1.28487	0.768	0.316	0	8	FCER1G
0	1.00954	0.771	0.349	0	8	SERPINA3
0	1.8924	0.555	0.144	0	8	IGSF6
0	0.940146	0.691	0.309	0	8	CD4
0	1.46124	0.558	0.177	0	8	C1QC
0	1.31646	0.599	0.226	0	8	FGL2
0	1.95601	0.511	0.145	0	8	APOC1
0	1.07184	0.581	0.224	0	8	AIF1
0	1.11548	0.977	0.621	0	8	DSP
0	1.13428	0.634	0.289	0	8	CD68
0	0.884472	0.955	0.641	0	8	CCND1
0	1.13964	0.584	0.272	0	8	CCNA2
0	0.59764	0.591	0.279	0	8	CXCL9
0	1.1645	0.451	0.15	0	8	C1QA
0	0.583974	0.737	0.44	0	8	CXCR4
0	0.775214	0.934	0.639	0	8	LDHB
0	0.825524	0.638	0.348	0	8	CDC20
0	1.23099	0.46	0.18	0	8	HAVCR2
0	0.777975	0.747	0.468	0	8	BACE2
0	0.859365	0.534	0.261	0	8	S100A14
0	0.853074	0.529	0.262	0	8	CDC14A
0	0.90395	0.437	0.182	0	8	CD14
0	1.27466	0.362	0.124	0	8	MNDA
0	1.42834	0.337	0.12	0	8	ITGAX
0	0.797998	0.357	0.14	0	8	SLAMF7
0	1.16432	0.314	0.113	0	8	CD86
0	1.68124	0.267	0.076	0	8	CD274
0	1.36755	0.255	0.09	0	8	CCNA1
0	1.60539	0.214	0.061	0	8	SPIB
0	3.12889	0.134	0.024	0	8	MMP12
1.86479e-275	0.590601	0.716	0.443	1.00885e-272	8	CCNB1
4.98284e-268	0.574107	0.517	0.269	2.69572e-265	8	GJB2
6.10959e-268	0.555226	0.684	0.394	3.30529e-265	8	FOXC1
4.63642e-265	0.502603	0.585	0.314	2.5083e-262	8	KIT
1.23117e-243	0.602298	0.662	0.402	6.66064e-241	8	TUBA4A
2.16466e-232	0.564358	0.631	0.374	1.17108e-229	8	CENPF
1.35563e-225	0.346721	0.979	0.911	7.33396e-223	8	PKM
8.31853e-208	0.953068	0.198	0.075	4.50033e-205	8	ITGAM
2.37111e-202	0.359856	0.803	0.581	1.28277e-199	8	DST
1.43931e-190	0.613407	0.508	0.294	7.78668e-188	8	PELI1
5.97021e-186	0.587156	0.675	0.463	3.22988e-183	8	WARS
1.57335e-180	0.460489	0.782	0.573	8.51181e-178	8	FLNB
6.15141e-179	0.767226	0.577	0.386	3.32791e-176	8	SLC5A6
2.49532e-175	0.473815	0.35	0.179	1.34997e-172	8	CD163
7.12062e-172	0.436317	0.765	0.535	3.85226e-169	8	SRPK1
1.1327e-166	0.456073	0.585	0.361	6.12793e-164	8	GLIPR1
1.00364e-157	0.42158	0.529	0.312	5.42969e-155	8	SLPI
1.75895e-157	0.506295	0.641	0.437	9.51591e-155	8	SQLE
2.41289e-156	1.45036	0.093	0.027	1.30538e-153	8	CD80
1.03712e-153	0.726801	0.313	0.164	5.61084e-151	8	AURKB
1.35467e-153	0.634609	0.394	0.223	7.32879e-151	8	TIFA
1.13284e-148	0.526985	0.506	0.312	6.12865e-146	8	DNTTIP1
4.5467e-145	0.58106	0.386	0.219	2.45976e-142	8	MKI67
5.67872e-135	0.59598	0.339	0.188	3.07219e-132	8	LGALSL
1.24271e-132	0.519742	0.394	0.231	6.72304e-130	8	CD83
1.37818e-130	1.41371	0.11	0.04	7.45595e-128	8	CXCL5
6.47324e-130	0.129995	0.922	0.706	3.50202e-127	8	KRT8
1.25484e-129	0.430698	0.52	0.328	6.78869e-127	8	SDC4
6.14738e-120	0.436881	0.488	0.309	3.32573e-117	8	AURKA
1.03475e-112	0.323944	0.423	0.255	5.59799e-110	8	EGFR
8.04276e-112	0.444174	0.405	0.247	4.35113e-109	8	RTKN2
2.96087e-95	0.375988	0.433	0.276	1.60183e-92	8	CXCL16
1.77154e-91	0.231921	0.971	0.761	9.58401e-89	8	KRT7
7.80882e-87	0.367736	0.439	0.29	4.22457e-84	8	TRIB1
1.72785e-84	0.296063	0.779	0.612	9.34769e-82	8	CCDC6
7.84756e-82	0.627194	0.181	0.095	4.24553e-79	8	DMKN
9.81842e-79	0.271715	0.517	0.356	5.31176e-76	8	EIF4EBP1
3.75506e-78	0.284554	0.485	0.33	2.03149e-75	8	MASTL
6.46463e-75	0.257371	0.373	0.237	3.49737e-72	8	APOBEC3B
3.14239e-74	0.826743	0.089	0.037	1.70003e-71	8	LY86
7.93383e-72	0.125293	0.661	0.48	4.2922e-69	8	ATM
6.95039e-70	0.223702	0.736	0.559	3.76016e-67	8	HMGA1
1.69732e-68	0.574243	0.116	0.056	9.18248e-66	8	PDCD1LG2
2.14368e-66	0.957829	0.099	0.046	1.15973e-63	8	HK3
8.18769e-66	0.66079	0.2	0.118	4.42954e-63	8	C15orf48
4.40264e-60	0.320039	0.423	0.297	2.38183e-57	8	HOOK2
2.97148e-58	0.758422	0.079	0.035	1.60757e-55	8	CLECL1
3.78848e-55	0.140357	0.854	0.664	2.04957e-52	8	TPD52
4.57521e-49	0.636374	0.106	0.056	2.47519e-46	8	CTH
8.15412e-49	0.21403	0.682	0.54	4.41138e-46	8	LARS
9.97918e-47	0.167125	0.739	0.587	5.39874e-44	8	TRAPPC3
1.01112e-42	0.522439	0.095	0.051	5.47014e-40	8	TIMP4
5.03638e-42	0.227853	0.271	0.184	2.72468e-39	8	CDC42EP1
2.88961e-40	0.341663	0.137	0.081	1.56328e-37	8	TNF
3.08836e-40	0.280406	0.102	0.056	1.67081e-37	8	SNAI1
9.65169e-40	0.451647	0.178	0.114	5.22157e-37	8	PDK4
4.20467e-38	0.394722	0.119	0.069	2.27473e-35	8	APOBEC3A
4.75722e-38	0.14963	0.429	0.316	2.57366e-35	8	LYPD3
1.03557e-37	0.438078	0.123	0.072	5.60243e-35	8	NDUFA4L2
2.34114e-35	0.141507	0.331	0.239	1.26655e-32	8	USP53
5.27834e-28	0.14457	0.272	0.197	2.85558e-25	8	THAP2
4.49587e-25	0.219247	0.113	0.072	2.43226e-22	8	OXTR
3.4959e-24	0.956055	0.019	0.007	1.89128e-21	8	UnassignedCodeword-0445
7.99528e-24	0.638688	0.052	0.028	4.32544e-21	8	PLD4
1.43274e-22	0.620004	0.068	0.04	7.7511e-20	8	CX3CR1
1.37706e-20	0.437181	0.038	0.019	7.44992e-18	8	SSTR2
2.86078e-17	0.164436	0.063	0.038	1.54768e-14	8	ESR1
7.6112e-07	0.706174	0.034	0.023	0.000411766	8	FCER1A
2.25806e-05	0.637495	0.01	0.006	0.0122161	8	UnassignedCodeword-0030
0	1.94099	0.868	0.279	0	9	PTN
0	1.27726	0.828	0.264	0	9	AQP1
0	1.45676	0.962	0.419	0	9	SFRP1
0	1.32481	0.924	0.488	0	9	BCL2
0	2.06324	0.558	0.134	0	9	TUBB2B
0	2.12659	0.531	0.127	0	9	IDO1
0	1.16053	0.859	0.472	0	9	TOP2A
0	0.723153	0.742	0.37	0	9	LYZ
0	1.17741	0.745	0.394	0	9	E2F3
0	1.02363	0.602	0.259	0	9	TCF4
0	0.880683	0.821	0.492	0	9	BASP1
0	0.676284	0.905	0.584	0	9	PTEN
0	0.710416	0.705	0.39	0	9	KLF5
0	1.26129	0.544	0.232	0	9	APOBEC3B
0	0.636989	0.795	0.487	0	9	ITM2C
0	1.14645	0.897	0.592	0	9	CD47
0	1.10333	0.655	0.351	0	9	EIF4EBP1
0	0.409821	0.583	0.279	0	9	CXCL9
0	2.89114	0.357	0.056	0	9	SPIB
0	0.694759	0.767	0.475	0	9	FAM107B
0	2.05768	0.339	0.072	0	9	BMP7
0	0.886599	0.774	0.508	0	9	ZNF562
0	1.24434	0.967	0.702	0	9	NARS
0	0.652617	0.935	0.671	0	9	DSC2
0	0.777886	0.486	0.23	0	9	FGL2
0	1.23003	0.447	0.192	0	9	DCLK1
0	0.956084	0.504	0.254	0	9	PCLAF
0	1.97295	0.314	0.075	0	9	CTLA4
0	1.8267	0.354	0.115	0	9	TCIM
0	0.936926	0.694	0.462	0	9	WARS
0	1.06507	0.407	0.182	0	9	HAVCR2
0	0.706713	0.801	0.582	0	9	STAT3
0	1.16495	0.322	0.114	0	9	LPL
0	0.668496	0.897	0.691	0	9	ENAH
0	1.15043	0.299	0.101	0	9	NCAM1
0	3.22444	0.141	0.02	0	9	FCER1A
1.60292e-302	0.98588	0.576	0.337	8.67181e-300	9	ACTG2
8.28457e-292	0.630667	0.817	0.59	4.48195e-289	9	SEC11C
2.49917e-284	0.596629	0.567	0.301	1.35205e-281	9	FBLN1
1.09524e-281	0.852193	0.569	0.327	5.92528e-279	9	MASTL
6.91342e-272	0.584225	0.808	0.572	3.74016e-269	9	WEE1
1.61177e-267	0.480549	0.966	0.746	8.71966e-265	9	EPCAM
6.23599e-264	0.860127	0.372	0.173	3.37367e-261	9	CD8A
2.69569e-263	0.629321	0.774	0.535	1.45837e-260	9	SRPK1
1.86298e-262	0.847924	0.557	0.333	1.00787e-259	9	SLC25A37
1.06866e-256	0.72608	0.41	0.199	5.78147e-254	9	KRT23
6.56327e-240	0.540808	0.777	0.536	3.55073e-237	9	ERBB2
4.24825e-238	0.451244	0.573	0.322	2.2983e-235	9	FCER1G
5.49493e-228	0.922549	0.338	0.16	2.97276e-225	9	CCNE1
3.53667e-225	0.478297	0.91	0.767	1.91334e-222	9	RUNX1
7.93806e-205	0.536131	0.762	0.558	4.29449e-202	9	HMGA1
2.05876e-204	0.730429	0.282	0.126	1.11379e-201	9	MNDA
7.80501e-201	0.490276	0.434	0.228	4.22251e-198	9	AIF1
6.1005e-190	0.382406	0.915	0.739	3.30037e-187	9	SMS
7.28895e-188	0.829511	0.368	0.196	3.94332e-185	9	STXBP4
1.24713e-182	0.491709	0.701	0.482	6.74698e-180	9	CDC25B
7.92722e-178	0.637056	0.311	0.152	4.28863e-175	9	IGSF6
1.28872e-176	0.479853	0.771	0.586	6.97197e-174	9	TRAPPC3
7.25141e-173	0.613986	0.465	0.275	3.92301e-170	9	CXCL16
1.35877e-164	1.83134	0.09	0.025	7.35092e-162	9	IFNG
1.00977e-152	1.02946	0.165	0.067	5.46284e-150	9	NKG7
1.28869e-151	0.56635	0.494	0.309	6.9718e-149	9	AURKA
1.00291e-141	0.504495	0.61	0.433	5.42576e-139	9	SEC24A
3.04232e-141	0.407281	0.774	0.603	1.64589e-138	9	MDM2
4.64896e-141	0.601444	0.489	0.319	2.51509e-138	9	EEF2K
2.96139e-128	1.10189	0.118	0.044	1.60211e-125	9	GZMB
1.65593e-119	0.581011	0.51	0.355	8.95857e-117	9	MYO5B
7.64061e-119	0.596724	0.341	0.201	4.13357e-116	9	CDC14B
1.42003e-116	0.775366	0.147	0.063	7.68239e-114	9	STC1
2.3743e-116	0.572424	0.395	0.247	1.2845e-113	9	RTKN2
6.55469e-116	0.473328	0.151	0.064	3.54609e-113	9	LTB
5.35308e-111	0.131163	0.354	0.202	2.89602e-108	9	TRAC
1.24005e-105	0.341894	0.775	0.612	6.70868e-103	9	CCDC6
3.28074e-104	0.557899	0.536	0.387	1.77488e-101	9	SLC5A6
1.15552e-103	0.299496	0.805	0.627	6.25139e-101	9	VEGFA
4.27169e-103	0.282231	0.38	0.231	2.31099e-100	9	LPXN
2.48814e-100	0.310507	0.524	0.352	1.34608e-97	9	CDC20
4.58648e-100	0.590014	0.266	0.151	2.48129e-97	9	AKR1C1
1.09987e-99	0.910979	0.147	0.068	5.95029e-97	9	APOBEC3A
1.5792e-94	0.210005	0.316	0.184	8.54346e-92	9	C1QC
5.44912e-93	0.664072	0.264	0.155	2.94798e-90	9	PTRHD1
9.22349e-93	0.219809	0.558	0.376	4.98991e-90	9	CENPF
1.61115e-91	0.525344	0.264	0.153	8.71633e-89	9	APOC1
6.69444e-87	0.284413	0.402	0.258	3.62169e-84	9	TMEM173
1.47608e-86	0.587902	0.311	0.196	7.98558e-84	9	THAP2
1.07918e-85	0.858147	0.153	0.076	5.83835e-83	9	LAG3
1.06477e-81	0.602028	0.271	0.165	5.7604e-79	9	AURKB
6.63757e-79	0.364918	0.25	0.145	3.59092e-76	9	CCL5
4.01112e-75	0.304992	0.688	0.54	2.17002e-72	9	LARS
8.25788e-72	0.239641	0.497	0.36	4.46751e-69	9	SMAP2
1.23364e-70	0.377752	0.409	0.285	6.67399e-68	9	OCIAD2
1.55521e-70	0.19375	0.607	0.447	8.4137e-68	9	CCNB1
2.425e-70	1.41313	0.037	0.01	1.31193e-67	9	PDCD1
2.30529e-69	0.261918	0.349	0.233	1.24716e-66	9	CD83
1.16414e-68	0.371812	0.26	0.159	6.29798e-66	9	AR
4.68549e-67	0.329543	0.203	0.116	2.53485e-64	9	CD86
1.29095e-66	0.369674	0.333	0.221	6.98406e-64	9	MKI67
3.14967e-66	0.379026	0.339	0.227	1.70397e-63	9	KARS
1.69246e-62	0.134845	0.77	0.619	9.15619e-60	9	NFKBIA
1.73098e-60	0.123743	0.276	0.172	9.36458e-58	9	IL2RG
3.74363e-60	0.457576	0.131	0.069	2.0253e-57	9	TIGIT
5.88183e-58	1.02657	0.079	0.036	3.18207e-55	9	UnassignedCodeword-0122
6.39833e-58	0.15309	0.42	0.295	3.46149e-55	9	CD68
1.70597e-53	0.79157	0.103	0.052	9.22928e-51	9	PRF1
1.2281e-51	0.255896	0.291	0.193	6.64401e-49	9	SERPINB9
2.10548e-48	0.307753	0.403	0.298	1.13906e-45	9	HOOK2
8.06624e-45	0.126455	0.181	0.111	4.36383e-42	9	GZMA
1.96026e-37	0.558076	0.142	0.089	1.0605e-34	9	DUSP2
6.66082e-36	0.256284	0.308	0.226	3.6035e-33	9	TIFA
1.20738e-35	0.185134	0.626	0.496	6.53194e-33	9	CDH1
4.14125e-32	0.288514	0.103	0.06	2.24042e-29	9	CD27
1.01304e-29	0.483006	0.066	0.035	5.48057e-27	9	CLECL1
1.19056e-29	0.36339	0.167	0.114	6.44095e-27	9	C2orf42
7.51205e-24	0.430694	0.09	0.056	4.06402e-21	9	KLRC1
6.38744e-23	0.318152	0.069	0.04	3.45561e-20	9	CLIC6
2.5739e-22	0.457106	0.108	0.072	1.39248e-19	9	OXTR
4.88339e-22	0.306624	0.049	0.026	2.64191e-19	9	MMP12
1.2095e-21	0.744949	0.039	0.019	6.54338e-19	9	SSTR2
1.77722e-21	0.393522	0.09	0.057	9.61474e-19	9	KLRD1
9.72069e-20	0.154886	0.257	0.201	5.25889e-17	9	RAB30
1.93916e-18	0.176517	0.117	0.081	1.04909e-15	9	CD274
4.01982e-17	0.248483	0.234	0.185	2.17472e-14	9	C6orf132
8.65703e-15	0.202991	0.078	0.052	4.68346e-12	9	ANKRD29
3.72413e-12	0.269414	0.073	0.051	2.01475e-09	9	CXCR6
9.69561e-12	0.361803	0.043	0.027	5.24533e-09	9	DNAAF1
1.51538e-11	0.112085	0.344	0.294	8.1982e-09	9	TRAF4
1.21508e-10	0.102238	0.109	0.082	6.57359e-08	9	TNF
1.31424e-08	0.173862	0.057	0.04	7.11004e-06	9	CX3CR1
1.25036e-07	0.103197	0.041	0.028	6.76445e-05	9	TAC1
0.00207565	0.157458	0.021	0.015	1	9	CLEC9A
0.00209421	0.256139	0.011	0.007	1	9	UnassignedCodeword-0445
0	6.56713	0.701	0.022	0	10	MS4A1
0	5.86896	0.66	0.031	0	10	BANK1
0	2.35296	0.864	0.271	0	10	PTPRC
0	3.44338	0.636	0.096	0	10	SELL
0	2.4633	0.676	0.162	0	10	IL2RG
0	2.19817	0.704	0.194	0	10	TRAC
0	2.03533	0.638	0.181	0	10	CD3E
0	2.47991	0.575	0.129	0	10	IL7R
0	2.53037	0.532	0.116	0	10	CYTIP
0	3.57028	0.468	0.056	0	10	LTB
0	4.7063	0.384	0.022	0	10	CD79A
0	6.32967	0.367	0.009	0	10	CD19
0	1.89801	0.493	0.139	0	10	CCL5
0	1.26448	0.688	0.345	0	10	ZEB2
0	1.9486	0.561	0.227	0	10	LPXN
0	1.52868	0.613	0.28	0	10	CXCL9
0	1.36617	0.643	0.312	0	10	CD4
0	2.11536	0.466	0.137	0	10	GPR183
0	1.80042	0.487	0.171	0	10	CD8A
0	2.76345	0.364	0.056	0	10	CCR7
0	1.04625	0.672	0.374	0	10	LYZ
0	1.50321	0.77	0.478	0	10	ATM
0	1.74926	0.647	0.357	0	10	SMAP2
0	5.11642	0.319	0.032	0	10	ADH1B
0	1.79975	0.387	0.106	0	10	GZMA
0	1.53098	0.456	0.19	0	10	SERPINB9
0	1.27688	0.579	0.316	0	10	TGFB1
0	2.74245	0.321	0.062	0	10	RHOH
0	1.98625	0.354	0.096	0	10	CD3G
0	1.40649	0.701	0.443	0	10	CXCR4
0	1.87253	0.356	0.103	0	10	CD247
0	4.35596	0.276	0.023	0	10	CD79B
0	3.11968	0.363	0.11	0	10	PDK4
0	1.17765	0.48	0.231	0	10	FGL2
0	2.44416	0.328	0.08	0	10	SLAMF1
0	1.27828	0.717	0.478	0	10	FAM107B
0	1.29614	0.465	0.229	0	10	AIF1
0	5.62935	0.251	0.015	0	10	ADIPOQ
0	2.16639	0.313	0.1	0	10	TCF7
0	2.37608	0.252	0.061	0	10	SPIB
0	2.34543	0.254	0.067	0	10	CD69
0	2.33496	0.235	0.053	0	10	KLRB1
0	2.15911	0.232	0.057	0	10	CD27
0	1.66874	0.227	0.066	0	10	NKG7
0	1.81789	0.226	0.072	0	10	IGF1
0	3.38245	0.164	0.022	0	10	TCL1A
0	2.79742	0.159	0.033	0	10	CLECL1
0	0.723441	1	0.991	0	10	B2M
1.11989e-298	1.39632	0.418	0.204	6.05862e-296	10	ADGRE5
3.24554e-267	1.65918	0.206	0.067	1.75584e-264	10	TIGIT
7.17683e-248	1.50837	0.28	0.115	3.88266e-245	10	CD86
2.39989e-233	1.3685	0.364	0.18	1.29834e-230	10	CD163
1.1677e-229	0.930147	0.461	0.255	6.31725e-227	10	CXCL12
5.32063e-222	1.22429	0.451	0.257	2.87846e-219	10	CCDC80
3.63386e-216	1.29733	0.327	0.154	1.96592e-213	10	C1QA
5.78453e-216	2.28655	0.13	0.036	3.12943e-213	10	LY86
3.87854e-211	1.04511	0.312	0.142	2.09829e-208	10	SLAMF7
3.64022e-208	0.994223	0.545	0.363	1.96936e-205	10	GLIPR1
2.44425e-206	1.22268	0.298	0.135	1.32234e-203	10	IDO1
3.76978e-206	0.90502	0.491	0.294	2.03945e-203	10	CD68
5.86755e-204	1.32479	0.283	0.127	3.17435e-201	10	MNDA
1.00584e-202	1.60401	0.161	0.053	5.44162e-200	10	PTGDS
1.7682e-199	1.77457	0.205	0.079	9.56594e-197	10	TNF
9.56562e-196	1.66962	0.155	0.051	5.175e-193	10	CCR2
1.20092e-193	1.58567	0.156	0.051	6.497e-191	10	PRF1
6.23833e-189	1.65874	0.196	0.075	3.37494e-186	10	ITGAM
2.25774e-180	0.78924	0.514	0.325	1.22144e-177	10	FCER1G
5.39026e-178	0.701565	0.74	0.667	2.91613e-175	10	TOMM7
1.66621e-176	2.05797	0.102	0.027	9.0142e-174	10	CD80
3.64398e-173	1.14308	0.26	0.118	1.97139e-170	10	SFRP4
1.72046e-162	1.36354	0.194	0.079	9.30768e-160	10	DPT
4.51873e-156	1.05512	0.339	0.184	2.44463e-153	10	C1QC
2.65287e-153	0.967893	0.508	0.361	1.4352e-150	10	VOPP1
2.14132e-146	1.43129	0.369	0.233	1.15846e-143	10	CD83
1.02008e-133	0.520373	0.34	0.187	5.51861e-131	10	PECAM1
4.73682e-130	1.39476	0.22	0.107	2.56262e-127	10	MRC1
6.78011e-127	0.950276	0.327	0.186	3.66804e-124	10	CD14
8.62545e-123	1.47207	0.189	0.087	4.66637e-120	10	PPARG
3.29789e-119	1.88016	0.224	0.117	1.78416e-116	10	LPL
6.14989e-119	0.986575	0.28	0.154	3.32709e-116	10	IGSF6
4.11252e-116	2.10465	0.086	0.027	2.22487e-113	10	IL6
1.51593e-115	1.85313	0.111	0.04	8.20119e-113	10	AKR1C3
7.01533e-104	1.36662	0.133	0.055	3.79529e-101	10	PDCD1LG2
2.62514e-99	1.36662	0.122	0.05	1.4202e-96	10	CXCR6
1.42353e-94	0.26176	0.516	0.36	7.70128e-92	10	LUM
4.5532e-85	1.13866	0.126	0.055	2.46328e-82	10	CCL8
1.2899e-80	0.366998	0.726	0.591	6.97834e-78	10	PTEN
1.3222e-79	1.23269	0.2	0.113	7.15309e-77	10	FAM49A
1.61351e-75	1.21964	0.121	0.055	8.72909e-73	10	KLRC1
1.15861e-68	1.19244	0.12	0.057	6.26807e-66	10	KLRD1
2.75785e-66	0.453852	0.662	0.599	1.49199e-63	10	CD47
2.65804e-64	1.38903	0.064	0.023	1.438e-61	10	LILRA4
2.81231e-63	1.27336	0.159	0.088	1.52146e-60	10	DUSP2
4.61995e-63	0.770328	0.209	0.124	2.49939e-60	10	ITGAX
1.33156e-62	0.441465	0.506	0.401	7.20375e-60	10	S100A4
1.42917e-62	0.573611	0.574	0.5	7.73183e-60	10	BASP1
6.55947e-58	0.618383	0.524	0.465	3.54867e-55	10	RB1
5.22328e-55	1.62055	0.068	0.028	2.82579e-52	10	PLD4
1.91871e-53	0.535126	0.369	0.267	1.03802e-50	10	TCF4
1.42178e-51	0.978954	0.095	0.045	7.69183e-49	10	GZMB
3.36823e-50	0.626332	0.266	0.18	1.82221e-47	10	ZEB1
1.71544e-46	0.851909	0.141	0.08	9.28051e-44	10	CTLA4
7.33203e-46	0.77949	0.221	0.152	3.96663e-43	10	TENT5C
1.70018e-43	1.43343	0.047	0.018	9.19796e-41	10	TNFRSF17
9.83257e-40	1.46392	0.042	0.016	5.31942e-37	10	CAVIN2
5.91252e-36	1.18158	0.064	0.03	3.19867e-33	10	KLRF1
1.2082e-35	0.709438	0.248	0.181	6.53635e-33	10	CAV1
3.67968e-35	0.732988	0.069	0.034	1.9907e-32	10	GNLY
4.49406e-35	0.445986	0.26	0.187	2.43129e-32	10	HAVCR2
1.17331e-32	0.350672	0.627	0.621	6.34762e-30	10	HIF1A
4.85937e-32	0.402473	0.264	0.191	2.62892e-29	10	ADAM12
5.25429e-31	1.06388	0.066	0.033	2.84257e-28	10	IL2RA
8.83993e-31	0.641861	0.116	0.071	4.7824e-28	10	MZB1
1.04561e-30	0.964005	0.128	0.081	5.65674e-28	10	CD274
2.44084e-26	1.57468	0.018	0.006	1.3205e-23	10	GZMK
7.52788e-25	0.455299	0.489	0.469	4.07258e-22	10	WARS
8.60491e-24	0.443104	0.318	0.261	4.65526e-21	10	TMEM173
3.24872e-23	0.671322	0.292	0.246	1.75756e-20	10	PIM1
1.31194e-22	0.509137	0.196	0.145	7.09762e-20	10	PRDM1
2.29366e-18	1.09177	0.061	0.036	1.24087e-15	10	AQP3
3.74597e-18	0.128814	0.298	0.237	2.02657e-15	10	MMP2
6.49792e-18	1.03394	0.191	0.154	3.51537e-15	10	AKR1C1
5.7958e-17	1.23803	0.079	0.051	3.13553e-14	10	TIMP4
3.02426e-16	0.950226	0.047	0.027	1.63613e-13	10	IFNG
3.80313e-13	0.577661	0.27	0.241	2.05749e-10	10	APOBEC3B
1.35944e-11	0.759884	0.226	0.202	7.35456e-09	10	RAB30
1.49839e-11	0.693976	0.104	0.078	8.10629e-09	10	LAG3
4.09347e-11	0.422451	0.062	0.041	2.21456e-08	10	IL3RA
1.59411e-10	0.409579	0.231	0.199	8.62415e-08	10	MAP3K8
1.9736e-10	1.19543	0.021	0.011	1.06772e-07	10	PDCD1
6.70326e-10	0.115208	0.63	0.623	3.62647e-07	10	NFKBIA
1.05176e-09	0.538511	0.086	0.064	5.69001e-07	10	FOXP3
6.30249e-07	0.566174	0.241	0.228	0.000340965	10	TIFA
5.12285e-06	0.951043	0.024	0.015	0.00277146	10	CLEC9A
1.19673e-05	0.383514	0.017	0.01	0.00647432	10	TPSAB1
2.98582e-05	0.450186	0.041	0.03	0.0161533	10	PGR
4.64445e-05	0.748004	0.014	0.008	0.0251265	10	CTSG
0.000260686	0.140182	0.349	0.344	0.141031	10	ACTG2
0.00120286	0.427817	0.107	0.094	0.650746	10	PDE4A
0.00200968	0.3111	0.031	0.024	1	10	CPA3
0.00318258	0.901845	0.011	0.007	1	10	UnassignedCodeword-0445
0.00841946	0.279544	0.013	0.009	1	10	OPRPN
0	4.62646	0.652	0.045	0	11	MYH11
0	2.97165	0.819	0.355	0	11	MYLK
0	2.52015	0.818	0.356	0	11	SERPINA3
0	1.26954	0.824	0.43	0	11	SFRP1
0	3.11589	0.95	0.582	0	11	DST
0	2.25785	0.61	0.255	0	11	EGFR
0	1.64624	0.859	0.536	0	11	ACTA2
0	2.87728	0.409	0.118	0	11	TCIM
0	4.37494	0.308	0.026	0	11	PGR
0	3.18325	0.213	0.038	0	11	CLIC6
0	3.23969	0.198	0.037	0	11	ESR1
0	1.19281	0.901	0.769	0	11	RUNX1
4.45055e-277	1.64098	0.606	0.346	2.40775e-274	11	SVIL
4.46998e-269	0.94968	0.839	0.482	2.41826e-266	11	KRT14
1.73805e-237	3.18961	0.138	0.027	9.40287e-235	11	CEACAM6
1.71301e-215	2.47322	0.193	0.051	9.26736e-213	11	RORC
1.66177e-181	1.23066	0.628	0.41	8.99016e-179	11	GATA3
2.35064e-155	0.982598	0.426	0.197	1.2717e-152	11	ANKRD30A
5.98489e-140	0.855703	0.755	0.668	3.23783e-137	11	TOMM7
1.12471e-139	2.37985	0.181	0.061	6.08469e-137	11	FOXC2
5.22623e-136	4.24962	0.057	0.008	2.82739e-133	11	OPRPN
1.27555e-134	1.25736	0.364	0.18	6.90074e-132	11	CAV1
8.45386e-115	0.382598	0.788	0.513	4.57354e-112	11	KRT5
2.07562e-114	0.358571	0.845	0.579	1.12291e-111	11	TACSTD2
5.53411e-113	0.603794	0.78	0.591	2.99396e-110	11	PTEN
1.06438e-102	0.799904	0.663	0.541	5.75827e-100	11	ERBB2
8.53633e-97	0.850905	0.629	0.498	4.61815e-94	11	CDH1
6.36716e-93	0.81215	0.657	0.573	3.44463e-90	11	CREBBP
5.07541e-90	1.84583	0.209	0.096	2.7458e-87	11	DMKN
7.52738e-74	1.18135	0.229	0.114	4.07231e-71	11	PDK4
1.30161e-72	1.9435	0.132	0.052	7.0417e-70	11	ANKRD29
8.58338e-66	2.07282	0.215	0.111	4.64361e-63	11	PIGR
3.52871e-65	0.701299	0.313	0.172	1.90903e-62	11	FOXA1
1.26988e-61	0.681425	0.319	0.181	6.87005e-59	11	MLPH
3.18376e-61	2.18577	0.082	0.027	1.72242e-58	11	TCEAL7
2.46999e-60	1.93819	0.091	0.032	1.33627e-57	11	RAPGEF3
4.81793e-45	2.1232	0.141	0.072	2.6065e-42	11	OXTR
4.08028e-40	0.514321	0.413	0.296	2.20743e-37	11	PTN
1.33812e-38	1.45026	0.086	0.036	7.2392e-36	11	AQP3
2.83075e-33	0.498661	0.616	0.588	1.53143e-30	11	STAT3
4.35017e-33	0.926897	0.319	0.24	2.35344e-30	11	USP53
6.45913e-31	0.511174	0.625	0.617	3.49439e-28	11	CCDC6
2.794e-28	0.951181	0.128	0.07	1.51155e-25	11	NOSTRIN
1.57631e-26	1.55021	0.097	0.05	8.52784e-24	11	HPX
7.08681e-26	1.78163	0.043	0.016	3.83396e-23	11	CAVIN2
2.08307e-24	0.542518	0.494	0.45	1.12694e-21	11	CCPG1
8.71286e-22	0.901253	0.287	0.227	4.71366e-19	11	TIFA
1.11316e-17	0.696747	0.282	0.226	6.02218e-15	11	PDGFRA
6.95288e-17	0.490949	0.478	0.459	3.76151e-14	11	QARS
7.94305e-16	0.506726	0.098	0.058	4.29719e-13	11	AGR3
1.14861e-15	0.830821	0.212	0.162	6.21396e-13	11	AR
2.23258e-14	0.589913	0.318	0.269	1.20783e-11	11	S100A14
8.71577e-14	1.29281	0.052	0.027	4.71523e-11	11	DNAAF1
1.1797e-13	0.747267	0.252	0.204	6.38217e-11	11	CDC14B
9.49453e-13	0.424513	0.486	0.466	5.13654e-10	11	RB1
3.09446e-12	0.668532	0.141	0.1	1.6741e-09	11	DUSP5
4.85908e-10	0.226762	0.606	0.601	2.62876e-07	11	CD47
5.39931e-10	0.600649	0.32	0.295	2.92102e-07	11	TRAF4
8.54736e-10	0.716186	0.351	0.339	4.62412e-07	11	SLC25A37
9.06347e-10	0.404807	0.101	0.068	4.90334e-07	11	RHOH
3.8877e-09	0.574318	0.366	0.344	2.10324e-06	11	ACTG2
1.22222e-08	1.84054	0.015	0.006	6.61222e-06	11	UnassignedCodeword-0030
3.65637e-07	0.312647	0.566	0.579	0.00019781	11	FLNB
3.85028e-07	1.13544	0.028	0.015	0.0002083	11	CLEC9A
5.31708e-07	1.08066	0.06	0.04	0.000287654	11	CX3CR1
1.40982e-06	0.432207	0.323	0.305	0.000762711	11	SH3YL1
7.29603e-06	0.521858	0.384	0.385	0.00394715	11	CDKN1A
1.03533e-05	0.769661	0.033	0.02	0.00560113	11	SSTR2
2.26859e-05	0.226443	0.66	0.648	0.012273	11	LDHB
0.00013607	0.339092	0.223	0.199	0.0736139	11	MAP3K8
0.000331305	0.266598	0.519	0.545	0.179236	11	LARS
0.000724366	0.355833	0.098	0.08	0.391882	11	ALDH1A3
0.00113367	0.190913	0.09	0.116	0.613313	11	C2orf42
0.00347353	0.570072	0.161	0.147	1	11	TUBB2B
0.00627524	0.376603	0.27	0.262	1	11	TMEM173
0	5.76291	0.884	0.061	0	12	MZB1
0	5.01337	0.912	0.144	0	12	TENT5C
0	3.83833	0.829	0.137	0	12	SLAMF7
0	2.31448	0.727	0.183	0	12	PECAM1
0	4.79261	0.542	0.024	0	12	CD79A
0	3.08363	0.643	0.14	0	12	PRDM1
0	2.75066	0.594	0.12	0	12	CYTIP
0	1.37326	0.762	0.359	0	12	LUM
0	2.32424	0.886	0.491	0	12	ITM2C
0	5.53407	0.386	0.014	0	12	TNFRSF17
0	3.90485	0.411	0.049	0	12	CCR2
0	1.51609	0.571	0.234	0	12	MMP2
0	1.3696	0.492	0.171	0	12	IL2RG
0	1.59349	0.67	0.361	0	12	VOPP1
0	2.75391	0.335	0.058	0	12	CD27
0	1.63057	0.833	0.593	0	12	SEC11C
0	2.6939	0.137	0.016	0	12	CD19
0	0.902534	1	0.991	0	12	B2M
3.221e-278	1.48538	0.697	0.447	1.74256e-275	12	CCPG1
1.21117e-277	1.97189	0.297	0.083	6.55241e-275	12	SLAMF1
1.51445e-261	1.38023	0.563	0.258	8.19315e-259	12	CCDC80
9.88514e-256	1.13728	0.679	0.345	5.34786e-253	12	COL6A3
4.53778e-254	1.50636	0.67	0.435	2.45494e-251	12	SEC24A
1.60879e-242	1.54146	0.544	0.256	8.70353e-240	12	CXCL12
1.1008e-220	1.99198	0.252	0.073	5.95533e-218	12	IGF1
2.67584e-213	2.38909	0.142	0.028	1.44763e-210	12	CD79B
4.4247e-213	0.982785	0.649	0.345	2.39376e-210	12	POSTN
2.71556e-194	2.28195	0.156	0.035	1.46912e-191	12	AQP3
2.41839e-193	1.82152	0.228	0.067	1.30835e-190	12	RHOH
6.3616e-184	1.60348	0.319	0.119	3.44163e-181	12	SFRP4
1.84112e-158	2.07307	0.264	0.098	9.96048e-156	12	DUSP5
5.70357e-157	0.983645	0.687	0.483	3.08563e-154	12	ATM
3.94903e-151	1.67753	0.394	0.2	2.13642e-148	12	RAB30
4.8519e-143	1.07992	0.441	0.219	2.62488e-140	12	FAP
3.14192e-138	1.287	0.35	0.156	1.69978e-135	12	C1QA
7.04225e-136	1.40988	0.483	0.292	3.80986e-133	12	TRIB1
2.03084e-127	1.56815	0.221	0.08	1.09868e-124	12	DPT
8.44361e-127	1.33856	0.518	0.336	4.56799e-124	12	ERN1
9.50195e-127	1.48309	0.228	0.084	5.14056e-124	12	LRRC15
9.2187e-126	0.892989	0.549	0.327	4.98732e-123	12	FCER1G
1.13055e-117	1.04877	0.383	0.191	6.11626e-115	12	ADAM12
1.15092e-112	2.07963	0.131	0.038	6.2265e-110	12	ESR1
1.91469e-111	0.843651	0.438	0.235	1.03585e-108	12	FGL2
3.58261e-108	0.68531	0.701	0.539	1.93819e-105	12	ACTA2
2.46899e-102	0.756003	0.379	0.193	1.33572e-99	12	PDGFRB
8.65066e-101	1.05032	0.361	0.186	4.68001e-98	12	C1QC
1.37559e-98	1.01468	0.415	0.232	7.44195e-96	12	AIF1
5.6907e-97	1.0479	0.359	0.188	3.07867e-94	12	CD14
8.00383e-96	0.866839	0.485	0.297	4.33007e-93	12	CD68
2.58524e-95	1.04634	0.379	0.207	1.39861e-92	12	ADGRE5
1.16055e-94	0.685268	0.578	0.379	6.2786e-92	12	LYZ
1.39924e-94	0.693653	0.353	0.18	7.56989e-92	12	CAV1
2.64081e-93	0.352405	0.507	0.283	1.42868e-90	12	PTPRC
7.69509e-86	0.613998	0.553	0.351	4.16304e-83	12	ZEB2
5.91201e-80	1.07404	0.334	0.183	3.1984e-77	12	CD163
2.38949e-78	0.909069	0.39	0.234	1.29271e-75	12	LPXN
7.71791e-77	0.933522	0.333	0.18	4.17539e-74	12	ZEB1
1.15346e-76	0.730982	0.445	0.267	6.2402e-74	12	TCF4
3.132e-59	1.11397	0.35	0.225	1.69441e-56	12	PDGFRA
2.06503e-58	1.16772	0.135	0.055	1.11718e-55	12	PTGDS
2.12233e-53	0.636892	0.328	0.195	1.14818e-50	12	SERPINB9
5.40326e-49	0.578921	0.461	0.321	2.92316e-46	12	TGFB1
2.13334e-47	1.22923	0.181	0.093	1.15414e-44	12	PDE4A
2.56452e-46	1.02302	0.351	0.243	1.38741e-43	12	CRISPLD2
1.18344e-44	0.521656	0.615	0.501	6.40241e-42	12	BASP1
1.61912e-43	0.687242	0.468	0.363	8.75943e-41	12	SMAP2
4.4622e-42	0.446019	0.453	0.319	2.41405e-39	12	CD4
3.38167e-41	0.478304	0.748	0.668	1.82948e-38	12	TPD52
4.26725e-39	1.09782	0.122	0.056	2.30858e-36	12	PDCD1LG2
2.10261e-38	0.596048	0.56	0.468	1.13751e-35	12	WARS
6.90184e-36	0.628961	0.24	0.144	3.7339e-33	12	GPR183
3.31884e-35	0.956043	0.319	0.227	1.79549e-32	12	TIFA
4.80067e-35	0.937348	0.189	0.108	2.59716e-32	12	MRC1
1.52234e-32	0.772866	0.199	0.118	8.23586e-30	12	CD86
8.45193e-31	1.45812	0.069	0.028	4.57249e-28	12	IL6
2.23972e-27	2.21038	0.027	0.007	1.21169e-24	12	UnassignedCodeword-0445
1.20578e-26	2.45989	0.033	0.01	6.52329e-24	12	TPSAB1
1.21317e-26	0.233405	0.395	0.287	6.56324e-24	12	CXCL9
4.65451e-26	0.239753	0.714	0.593	2.51809e-23	12	PTEN
1.17137e-22	0.571943	0.387	0.308	6.3371e-20	12	FBLN1
2.95306e-22	0.555686	0.091	0.046	1.5976e-19	12	BANK1
1.01798e-21	0.587442	0.199	0.13	5.50725e-19	12	MNDA
2.39359e-21	0.927759	0.175	0.114	1.29493e-18	12	FAM49A
2.61734e-21	0.934545	0.103	0.056	1.41598e-18	12	CCL8
2.04983e-20	1.99978	0.054	0.023	1.10896e-17	12	CPA3
2.37107e-19	0.573708	0.224	0.156	1.28275e-16	12	IGSF6
6.91833e-19	1.85306	0.025	0.008	3.74282e-16	12	CTSG
1.55827e-18	0.608323	0.313	0.246	8.43023e-16	12	PIM1
1.68589e-18	0.404351	0.515	0.448	9.12066e-16	12	CXCR4
2.86906e-18	1.16412	0.066	0.033	1.55216e-15	12	MMP1
2.02892e-17	0.359754	0.544	0.483	1.09765e-14	12	FAM107B
7.37872e-17	0.710242	0.304	0.246	3.99189e-14	12	ANKRD28
1.21651e-16	0.439187	0.256	0.188	6.58129e-14	12	HAVCR2
2.40867e-13	0.327855	0.426	0.367	1.30309e-10	12	GLIPR1
5.6785e-11	0.83924	0.057	0.032	3.07207e-08	12	RAPGEF3
9.80255e-11	0.554115	0.167	0.123	5.30318e-08	12	GFPT2
2.29393e-10	0.830604	0.061	0.036	1.24101e-07	12	CLECL1
3.60716e-10	0.621719	0.199	0.155	1.95148e-07	12	APOC1
5.81608e-10	0.311962	0.499	0.466	3.1465e-07	12	RB1
3.15921e-09	0.496719	0.112	0.078	1.70913e-06	12	ITGAM
4.3026e-09	0.205323	0.348	0.289	2.3277e-06	12	FCGR3A
8.87172e-07	0.199436	0.069	0.046	0.00047996	12	GZMB
2.2782e-06	0.133602	0.447	0.403	0.00123251	12	S100A4
3.31068e-06	0.560057	0.058	0.039	0.00179108	12	LY86
6.6958e-06	0.41818	0.052	0.034	0.00362243	12	IL2RA
1.44876e-05	0.162101	0.661	0.669	0.00783778	12	TOMM7
0.000601427	0.586556	0.042	0.03	0.325372	12	PGR
0.00270085	0.457503	0.094	0.078	1	12	LAG3
0.00371571	0.538875	0.038	0.028	1	12	TCEAL7
0.0040485	0.457219	0.053	0.041	1	12	CLIC6
0.00808622	0.208172	0.119	0.102	1	12	C5orf46
0	6.97521	0.831	0.018	0	13	LILRA4
0	5.58726	0.774	0.041	0	13	GZMB
0	4.86441	0.613	0.051	0	13	PTGDS
0	2.14001	0.868	0.316	0	13	CD4
0	5.7299	0.57	0.022	0	13	TCL1A
0	2.86415	0.651	0.105	0	13	SELL
0	2.73647	0.687	0.142	0	13	SLAMF7
0	4.86816	0.57	0.038	0	13	IL3RA
0	1.72583	0.811	0.282	0	13	PTPRC
0	3.90367	0.563	0.061	0	13	SPIB
0	1.81036	0.768	0.284	0	13	CXCL9
0	1.99535	0.629	0.172	0	13	IL2RG
0	1.67113	0.782	0.326	0	13	FCER1G
0	1.62344	0.817	0.378	0	13	LYZ
0	1.7245	0.629	0.204	0	13	TRAC
0	4.89059	0.434	0.026	0	13	PLD4
0	2.31441	0.549	0.142	0	13	GPR183
0	2.00124	0.629	0.232	0	13	LPXN
0	3.43675	0.431	0.051	0	13	CCR2
0	1.96999	0.48	0.124	0	13	CYTIP
0	2.7595	0.393	0.064	0	13	LTB
1.10921e-307	1.70777	0.595	0.19	6.0008e-305	13	CD3E
3.8027e-301	1.6662	0.855	0.493	2.05726e-298	13	ITM2C
2.30818e-298	1.48316	0.789	0.351	1.24873e-295	13	ZEB2
9.05956e-276	1.94532	0.563	0.193	4.90122e-273	13	SERPINB9
5.92119e-269	1.93837	0.531	0.176	3.20336e-266	13	CD8A
2.44524e-266	1.78185	0.49	0.145	1.32287e-263	13	CCL5
1.19631e-259	2.16178	0.313	0.068	6.47204e-257	13	NKG7
3.49161e-250	2.02028	0.435	0.128	1.88896e-247	13	MNDA
8.2913e-247	1.97205	0.404	0.111	4.48559e-244	13	GZMA
4.17373e-213	1.81497	0.458	0.154	2.25799e-210	13	IGSF6
6.33188e-211	0.571289	1	0.991	3.42555e-208	13	B2M
4.07409e-209	2.41798	0.345	0.098	2.20408e-206	13	DUSP5
1.43933e-201	2.16555	0.284	0.07	7.78677e-199	13	MZB1
7.33702e-195	1.34625	0.642	0.297	3.96933e-192	13	CD68
1.19928e-182	1.84156	0.371	0.117	6.48811e-180	13	CD86
2.31775e-181	1.58905	0.416	0.139	1.2539e-178	13	IL7R
1.92582e-177	2.57066	0.182	0.035	1.04187e-174	13	CLECL1
1.19846e-169	1.99356	0.252	0.062	6.48367e-167	13	CCR7
1.52447e-168	1.5352	0.542	0.235	8.2474e-166	13	FGL2
2.36677e-168	1.84738	0.604	0.336	1.28042e-165	13	ERN1
1.75515e-161	1.73401	0.391	0.137	9.49537e-159	13	IDO1
1.12286e-154	1.38227	0.527	0.232	6.07465e-152	13	AIF1
5.89753e-152	0.943036	0.481	0.188	3.19056e-149	13	PECAM1
1.36054e-149	1.46747	0.558	0.267	7.36052e-147	13	TCF4
1.04338e-131	1.64315	0.305	0.1	5.6447e-129	13	CD3G
9.49918e-109	1.05874	0.688	0.447	5.13906e-106	13	CXCR4
4.03944e-103	1.33626	0.297	0.108	2.18534e-100	13	CD247
3.65303e-95	1.08729	0.59	0.366	1.97629e-92	13	GLIPR1
4.69725e-95	1.27672	0.426	0.207	2.54121e-92	13	ADGRE5
2.45767e-81	1.50658	0.206	0.069	1.3296e-78	13	TIGIT
2.29098e-78	0.95595	0.539	0.321	1.23942e-75	13	TGFB1
6.60527e-76	1.48483	0.198	0.068	3.57345e-73	13	RHOH
1.52066e-64	1.36551	0.217	0.085	8.22678e-62	13	SLAMF1
2.36195e-62	1.38646	0.173	0.061	1.27782e-59	13	CD27
6.94304e-60	1.08394	0.357	0.187	3.75618e-57	13	HAVCR2
2.95777e-59	1.18354	0.143	0.046	1.60015e-56	13	BANK1
2.90308e-57	0.95961	0.357	0.187	1.57056e-54	13	C1QC
5.15785e-57	1.48475	0.153	0.053	2.7904e-54	13	PRF1
1.32345e-55	0.988819	0.348	0.183	7.15985e-53	13	CD163
1.44277e-53	0.921748	0.314	0.158	7.8054e-51	13	C1QA
5.72084e-53	0.843082	0.529	0.364	3.09497e-50	13	VOPP1
6.37491e-51	0.758487	0.627	0.484	3.44882e-48	13	ATM
3.37765e-50	1.42177	0.176	0.071	1.82731e-47	13	CD69
2.26419e-48	0.640125	0.432	0.259	1.22493e-45	13	CXCL12
2.54447e-48	0.714566	0.63	0.482	1.37656e-45	13	FAM107B
1.49205e-42	1.3106	0.146	0.057	8.07201e-40	13	KLRD1
1.02005e-37	1.26206	0.222	0.114	5.51848e-35	13	FAM49A
9.5009e-34	1.35086	0.125	0.051	5.13998e-31	13	CXCR6
3.11961e-33	0.663426	0.57	0.469	1.68771e-30	13	WARS
3.66439e-33	1.1414	0.163	0.075	1.98244e-30	13	IGF1
4.87223e-32	0.670756	0.315	0.189	2.63588e-29	13	CD14
1.14757e-31	1.4679	0.132	0.057	6.20837e-29	13	KLRB1
8.36838e-31	1.29044	0.167	0.081	4.52729e-28	13	CTLA4
4.87862e-29	1.32318	0.164	0.082	2.63933e-26	13	CD274
1.0712e-28	1.28192	0.128	0.057	5.79519e-26	13	PDCD1LG2
4.01857e-27	0.66037	0.468	0.363	2.17405e-24	13	SMAP2
1.253e-26	0.900957	0.222	0.125	6.77873e-24	13	ITGAX
2.82518e-26	0.458067	0.528	0.403	1.52842e-23	13	S100A4
1.77748e-25	1.04698	0.19	0.104	9.61616e-23	13	TCF7
1.95277e-25	0.863998	0.254	0.155	1.05645e-22	13	APOC1
6.48883e-25	0.813398	0.244	0.146	3.51045e-22	13	PRDM1
1.44412e-24	1.19737	0.121	0.056	7.81267e-22	13	KLRC1
3.26443e-23	1.6512	0.056	0.018	1.76606e-20	13	TNFRSF17
8.98406e-23	0.721091	0.21	0.121	4.86037e-20	13	SFRP4
9.09527e-23	1.22065	0.119	0.056	4.92054e-20	13	CCL8
5.13815e-21	1.18433	0.146	0.078	2.77974e-18	13	LAG3
1.31396e-19	1.00628	0.081	0.034	7.1085e-17	13	GNLY
1.97066e-19	0.260076	0.73	0.593	1.06613e-16	13	PTEN
1.57473e-17	0.802681	0.146	0.081	8.51931e-15	13	DPT
2.33948e-17	0.41822	0.364	0.261	1.26566e-14	13	CCDC80
1.51117e-16	0.506642	0.526	0.466	8.17541e-14	13	RB1
1.69938e-16	0.966161	0.144	0.082	9.19365e-14	13	TNF
1.73026e-16	1.0704	0.152	0.09	9.36071e-14	13	DUSP2
1.35382e-15	0.365905	0.688	0.669	7.32416e-13	13	TOMM7
6.29475e-15	0.308244	0.082	0.039	3.40546e-12	13	MS4A1
2.14832e-14	0.648821	0.274	0.199	1.16224e-11	13	MAP3K8
3.96208e-14	0.445782	0.262	0.181	2.14349e-11	13	ZEB1
4.86249e-14	0.755034	0.068	0.031	2.63061e-11	13	CD79A
1.60605e-13	1.18688	0.064	0.029	8.68871e-11	13	CD80
7.54623e-12	0.740896	0.173	0.116	4.08251e-09	13	PDK4
1.95919e-11	0.978188	0.109	0.064	1.05992e-08	13	FOXP3
9.62747e-11	1.34412	0.037	0.015	5.20846e-08	13	CLEC9A
1.42244e-08	0.298366	0.4	0.344	7.69542e-06	13	ACTG2
6.32373e-08	0.513074	0.292	0.241	3.42114e-05	13	APOBEC3B
2.2431e-07	1.43033	0.019	0.007	0.000121352	13	UnassignedCodeword-0445
3.18992e-07	0.457551	0.319	0.27	0.000172575	13	CDC14A
4.33771e-07	0.784339	0.323	0.295	0.00023467	13	TRAF4
1.05691e-06	1.01576	0.049	0.027	0.00057179	13	IFNG
2.02181e-06	0.981897	0.023	0.01	0.0010938	13	TPSAB1
2.13643e-06	0.169312	0.639	0.601	0.00115581	13	CD47
2.24559e-06	0.75889	0.061	0.037	0.00121486	13	AQP3
3.22867e-06	0.465977	0.412	0.385	0.00174671	13	CDKN1A
5.21433e-06	0.416219	0.148	0.109	0.00282095	13	MRC1
7.81109e-06	0.350713	0.306	0.262	0.0042258	13	TMEM173
1.17892e-05	0.147167	0.649	0.623	0.00637797	13	NFKBIA
5.1263e-05	0.794279	0.051	0.031	0.0277333	13	KLRF1
0.000226304	0.693405	0.182	0.154	0.122431	13	TENT5C
0.000551447	0.991153	0.021	0.011	0.298333	13	PDCD1
0.00128833	0.226129	0.226	0.193	0.696988	13	ADAM12
0.00133372	0.171787	0.103	0.078	0.721543	13	ITGAM
0.00620358	0.864492	0.012	0.006	1	13	GZMK
0.00982185	0.622893	0.015	0.008	1	13	CTSG
