# Supplementary material
Source: Research Square preprint supplement (doi:10.21203/rs.3.rs-9572543/v1)
Supplement: Supplementary file 15 [file d0d7406b58815274aa34de60.xlsx]

## Sheet: TableS9
cluster	Gene	logFC	pvalue	FDR	signed_logp	sig_label	n_cells	cluster_lab
0	CD8A	0.675358	1.9227e-119	3.9467e-119	118.716078693803	***†††	260293	0 (n=260293)
0	CCR2	1.09962	2.4246e-101	4.6695e-101	100.615368334223	***†††	260293	0 (n=260293)
0	CXCL12	2.16142	0	0	Inf	***†††	260293	0 (n=260293)
0	LARS	-0.578836	0	0	-Inf	***†††	260293	0 (n=260293)
0	WEE1	-1.09854	0	0	-Inf	***†††	260293	0 (n=260293)
0	KIT	-1.72065	0	0	-Inf	***†††	260293	0 (n=260293)
0	CCNA1	-1.83852	0	0	-Inf	***†††	260293	0 (n=260293)
0	CCNA2	-0.722741	6.0509e-308	1.748e-307	-307.218178189921	***†††	260293	0 (n=260293)
0	CCNB1	-0.584501	0	0	-Inf	***†††	260293	0 (n=260293)
0	CCND1	-1.25804	0	0	-Inf	***†††	260293	0 (n=260293)
0	CDC14A	-1.50283	0	0	-Inf	***†††	260293	0 (n=260293)
0	CDC20	-0.536604	3.7537e-279	1.0647e-278	-278.42554593433	***†††	260293	0 (n=260293)
0	E2F3	-0.553788	0	0	-Inf	***†††	260293	0 (n=260293)
1	CD8A	2.24487	0	0	Inf	***†††	210222	1 (n=210222)
1	CCR2	2.15234	2.7512e-235	7.153e-235	234.560483193759	***†††	210222	1 (n=210222)
1	CXCL12	2.34051	0	0	Inf	***†††	210222	1 (n=210222)
1	LARS	0.42451	2.589e-172	5.8534e-172	171.586869821703	***†††	210222	1 (n=210222)
1	WEE1	-0.428549	4.2543e-203	1.037e-202	-202.37116984362	***†††	210222	1 (n=210222)
1	KIT	-1.97521	0	0	-Inf	***†††	210222	1 (n=210222)
1	CCNA1	-1.89425	1.1445e-189	2.7468e-189	-188.941392051421	***†††	210222	1 (n=210222)
1	CCNA2	0.690687	8.6093e-204	2.1318e-203	203.065034644372	***†††	210222	1 (n=210222)
1	CCNB1	0.679227	0	0	Inf	***†††	210222	1 (n=210222)
1	CCND1	-0.666078	0	0	-Inf	***†††	210222	1 (n=210222)
1	CDC14A	-0.527377	1.15973e-75	1.94536e-75	-74.9356418169318	***†††	210222	1 (n=210222)
1	CDC20	0.951249	0	0	Inf	***†††	210222	1 (n=210222)
1	E2F3	-0.0392557	0.0485414	0.0498188	-1.31388750872766	*†	210222	1 (n=210222)
2	CD8A	3.76116	0	0	Inf	***†††	163603	2 (n=163603)
2	CCR2	3.36408	0	0	Inf	***†††	163603	2 (n=163603)
2	CXCL12	1.71696	0	0	Inf	***†††	163603	2 (n=163603)
2	LARS	-0.111379	2.05934e-12	2.50982e-12	-11.6862718972521	***†††	163603	2 (n=163603)
2	WEE1	-1.51764	0	0	-Inf	***†††	163603	2 (n=163603)
2	KIT	-1.1143	0	0	-Inf	***†††	163603	2 (n=163603)
2	CCNA1	-2.54615	0	0	-Inf	***†††	163603	2 (n=163603)
2	CCNA2	-0.72765	0	0	-Inf	***†††	163603	2 (n=163603)
2	CCNB1	-1.29039	0	0	-Inf	***†††	163603	2 (n=163603)
2	CCND1	-0.420303	0	0	-Inf	***†††	163603	2 (n=163603)
2	CDC14A	-0.490939	3.76669e-79	6.52892e-79	-78.424040605736	***†††	163603	2 (n=163603)
2	CDC20	-0.953171	0	0	-Inf	***†††	163603	2 (n=163603)
2	E2F3	-0.996224	0	0	-Inf	***†††	163603	2 (n=163603)
3	CD8A	1.21232	1.5931e-247	4.2849e-247	246.797751795385	***†††	146567	3 (n=146567)
3	CCR2	2.01317	1.945e-257	5.3232e-257	256.71107639969	***†††	146567	3 (n=146567)
3	CXCL12	-0.257362	9.70336e-46	1.4147e-45	-45.0130778658677	***†††	146567	3 (n=146567)
3	LARS	-0.804814	0	0	-Inf	***†††	146567	3 (n=146567)
3	WEE1	-1.2542	0	0	-Inf	***†††	146567	3 (n=146567)
3	KIT	-2.41753	0	0	-Inf	***†††	146567	3 (n=146567)
3	CCNA1	-3.23715	0	0	-Inf	***†††	146567	3 (n=146567)
3	CCNA2	-2.0846	0	0	-Inf	***†††	146567	3 (n=146567)
3	CCNB1	-1.68451	0	0	-Inf	***†††	146567	3 (n=146567)
3	CCND1	-1.65736	0	0	-Inf	***†††	146567	3 (n=146567)
3	CDC14A	-2.1877	0	0	-Inf	***†††	146567	3 (n=146567)
3	CDC20	-2.00995	0	0	-Inf	***†††	146567	3 (n=146567)
3	E2F3	-0.102029	7.81586e-06	8.52639e-06	-5.10702321435138	***†††	146567	3 (n=146567)
4	CD8A	-0.395019	2.36191e-92	4.28439e-92	-91.6267371104442	***†††	122701	4 (n=122701)
4	CCR2	0.714253	2.18187e-68	3.62098e-68	67.6611706374759	***†††	122701	4 (n=122701)
4	CXCL12	-0.133664	2.88225e-13	3.59704e-13	-12.5402687444208	***†††	122701	4 (n=122701)
4	LARS	0.377994	2.33622e-78	3.96141e-78	77.6314867474557	***†††	122701	4 (n=122701)
4	WEE1	0.301615	4.24922e-41	6.13776e-41	40.3716910320117	***†††	122701	4 (n=122701)
4	KIT	0.275533	8.73504e-15	1.09892e-14	14.0587350483169	***†††	122701	4 (n=122701)
4	CCNA1	-1.23938	7.87592e-54	1.20455e-53	-53.1036989064353	***†††	122701	4 (n=122701)
4	CCNA2	1.1085	0	0	Inf	***†††	122701	4 (n=122701)
4	CCNB1	1.32069	0	0	Inf	***†††	122701	4 (n=122701)
4	CCND1	0.204071	1.10304e-52	1.66596e-52	51.9574074503759	***†††	122701	4 (n=122701)
4	CDC14A	-0.314865	6.36242e-22	8.48322e-22	-21.1963778952657	***†††	122701	4 (n=122701)
4	CDC20	1.69101	0	0	Inf	***†††	122701	4 (n=122701)
4	E2F3	0.172942	4.46308e-09	5.15733e-09	8.35036568935111	***†††	122701	4 (n=122701)
5	CD8A	-1.06336	0	0	-Inf	***†††	104365	5 (n=104365)
5	CCR2	2.1572	0	0	Inf	***†††	104365	5 (n=104365)
5	CXCL12	0.856399	0	0	Inf	***†††	104365	5 (n=104365)
5	LARS	0.55616	5.8698e-130	1.2374e-129	129.231375509447	***†††	104365	5 (n=104365)
5	WEE1	0.750993	1.5661e-179	3.5928e-179	178.805184812315	***†††	104365	5 (n=104365)
5	KIT	0.181322	0.000351897	0.000376	3.45358408037928	***†††	104365	5 (n=104365)
5	CCNA1	-0.875478	2.70486e-22	3.63757e-22	-21.5678549444272	***†††	104365	5 (n=104365)
5	CCNA2	0.757147	1.4853e-91	2.63303e-91	90.8281863809496	***†††	104365	5 (n=104365)
5	CCNB1	1.24234	0	0	Inf	***†††	104365	5 (n=104365)
5	CCND1	-0.988745	0	0	-Inf	***†††	104365	5 (n=104365)
5	CDC14A	-0.673727	2.07966e-58	3.21215e-58	-57.6820069907195	***†††	104365	5 (n=104365)
5	CDC20	1.06513	1.4322e-245	3.7868e-245	244.843995425595	***†††	104365	5 (n=104365)
5	E2F3	1.10398	0	0	Inf	***†††	104365	5 (n=104365)
6	CD8A	2.13526	0	0	Inf	***†††	72017	6 (n= 72017)
6	CCR2	4.40188	0	0	Inf	***†††	72017	6 (n= 72017)
6	CXCL12	-0.217012	9.36429e-19	1.22759e-18	-18.0285249890951	***†††	72017	6 (n= 72017)
6	LARS	-0.464651	3.66931e-65	5.72413e-65	-64.4354151435085	***†††	72017	6 (n= 72017)
6	WEE1	-1.49772	0	0	-Inf	***†††	72017	6 (n= 72017)
6	KIT	-1.38405	2.7525e-103	5.3673e-103	-102.560276008616	***†††	72017	6 (n= 72017)
6	CCNA1	-0.930195	2.15486e-18	2.80131e-18	-17.6665815315392	***†††	72017	6 (n= 72017)
6	CCNA2	-0.197279	1.4428e-05	1.56303e-05	-4.84079455446225	***†††	72017	6 (n= 72017)
6	CCNB1	-0.786036	7.1902e-113	1.438e-112	-112.143259655495	***†††	72017	6 (n= 72017)
6	CCND1	-1.1692	0	0	-Inf	***†††	72017	6 (n= 72017)
6	CDC14A	0.329013	8.29392e-13	1.02687e-12	12.08124020762	***†††	72017	6 (n= 72017)
6	CDC20	-0.862919	2.09771e-96	3.89575e-96	-95.67825476855	***†††	72017	6 (n= 72017)
6	E2F3	-1.15291	6.7309e-232	1.7213e-231	-231.171926978478	***†††	72017	6 (n= 72017)
7	CD8A	-0.381437	1.07267e-12	1.31761e-12	-11.9695339970746	***†††	52850	7 (n= 52850)
7	CCR2	0.516782	1.95382e-07	2.20866e-07	6.7091158154575	***†††	52850	7 (n= 52850)
7	CXCL12	1.23436	0	0	Inf	***†††	52850	7 (n= 52850)
7	LARS	-0.667358	3.3477e-131	7.2534e-131	-130.475250155878	***†††	52850	7 (n= 52850)
7	WEE1	-1.96238	0	0	-Inf	***†††	52850	7 (n= 52850)
7	KIT	-2.63847	0	0	-Inf	***†††	52850	7 (n= 52850)
7	CCNA1	-2.20175	6.21455e-92	1.11433e-91	-91.2065902682886	***†††	52850	7 (n= 52850)
7	CCNA2	-1.49699	4.1992e-171	9.3582e-171	-170.376832236096	***†††	52850	7 (n= 52850)
7	CCNB1	-1.81713	0	0	-Inf	***†††	52850	7 (n= 52850)
7	CCND1	-0.54064	6.2571e-217	1.5744e-216	-216.203624817141	***†††	52850	7 (n= 52850)
7	CDC14A	-1.11339	2.0275e-110	4.0037e-110	-109.693038671051	***†††	52850	7 (n= 52850)
7	CDC20	-1.80673	4.8822e-272	1.36e-271	-271.311383609152	***†††	52850	7 (n= 52850)
7	E2F3	-0.968924	1.31868e-88	2.3114e-88	-87.8798595820711	***†††	52850	7 (n= 52850)
8	CD8A	0.766509	3.74248e-34	5.21274e-34	33.4268403190254	***†††	36155	8 (n= 36155)
8	CCR2	1.79168	9.3803e-124	1.9511e-123	123.02778379824	***†††	36155	8 (n= 36155)
8	CXCL12	0.759998	7.34302e-95	1.34766e-94	94.1341255143044	***†††	36155	8 (n= 36155)
8	LARS	-0.169179	2.52841e-07	2.83764e-07	-6.59715302362457	***†††	36155	8 (n= 36155)
8	WEE1	-0.849826	1.85408e-96	3.48478e-96	-95.7318710785218	***†††	36155	8 (n= 36155)
8	KIT	-0.297017	3.34128e-10	3.97893e-10	-9.47608663381923	***†††	36155	8 (n= 36155)
8	CCNA1	-0.852344	4.86702e-10	5.75194e-10	-9.31273663623806	***†††	36155	8 (n= 36155)
8	CCNA2	0.440354	2.20963e-11	2.65155e-11	10.6556813583185	***†††	36155	8 (n= 36155)
8	CCNB1	0.285689	1.48845e-09	1.73283e-09	8.82726473877564	***†††	36155	8 (n= 36155)
8	CCND1	-0.724528	1.6208e-182	3.7739e-182	-181.790262056521	***†††	36155	8 (n= 36155)
8	CDC14A	-0.323435	1.02685e-07	1.16926e-07	-6.98849334475788	***†††	36155	8 (n= 36155)
8	CDC20	0.493292	6.40968e-17	8.12935e-17	16.1931636756457	***†††	36155	8 (n= 36155)
8	E2F3	0.267966	2.08735e-06	2.29314e-06	5.68040501896238	***†††	36155	8 (n= 36155)
9	CD8A	-0.403101	9.09278e-19	1.2021e-18	-18.0413033077759	***†††	25657	9 (n= 25657)
9	CCR2	1.20188	1.09506e-49	1.62694e-49	48.9605628097116	***†††	25657	9 (n= 25657)
9	CXCL12	0.560327	1.15448e-25	1.59379e-25	24.9376145529861	***†††	25657	9 (n= 25657)
9	LARS	-0.378013	3.86424e-17	4.94115e-17	-16.4129363882291	***†††	25657	9 (n= 25657)
9	WEE1	-1.16333	9.7413e-115	1.9736e-114	-114.011381009031	***†††	25657	9 (n= 25657)
9	KIT	-0.28874	8.61672e-05	9.2704e-05	-4.06465806744851	***†††	25657	9 (n= 25657)
9	CCNA1	-0.740975	3.36862e-07	3.75361e-07	-6.47254752738851	***†††	25657	9 (n= 25657)
9	CCNA2	-0.377972	4.26121e-07	4.71453e-07	-6.37046737289711	***†††	25657	9 (n= 25657)
9	CCNB1	-0.392486	7.84592e-12	9.48809e-12	-11.1053559441912	***†††	25657	9 (n= 25657)
9	CCND1	-0.649507	1.70408e-65	2.68521e-65	-64.7685111283782	***†††	25657	9 (n= 25657)
9	CDC14A	-0.904183	5.94945e-35	8.36139e-35	-34.2255232840056	***†††	25657	9 (n= 25657)
9	CDC20	-0.168075	0.0105107	0.0110045	-1.97836755207018	*†	25657	9 (n= 25657)
9	E2F3	-0.644785	2.53498e-22	3.43876e-22	-21.5960249169079	***†††	25657	9 (n= 25657)
10	CD8A	1.4787	2.99947e-98	5.7063e-98	97.5229557924442	***†††	19301	10 (n= 19301)
10	CCR2	-0.864548	1.95961e-47	2.88396e-47	-46.7078295757084	***†††	19301	10 (n= 19301)
10	CXCL12	-0.043989	0.417363	0.422783	-0.379486272769007		19301	10 (n= 19301)
10	LARS	0.181785	0.000634457	0.000673301	3.19759809124133	***†††	19301	10 (n= 19301)
10	WEE1	-0.554467	3.76516e-23	5.15232e-23	-22.4242169249256	***†††	19301	10 (n= 19301)
10	KIT	-1.39413	5.9061e-37	8.37592e-37	-36.2286991372552	***†††	19301	10 (n= 19301)
10	CCNA1	-1.23855	6.99969e-10	8.21016e-10	-9.15492120067236	***†††	19301	10 (n= 19301)
10	CCNA2	-0.0465706	0.605788	0.609697	-0.217679180207872		19301	10 (n= 19301)
10	CCNB1	-0.178929	0.00489515	0.00515975	-2.31023423985851	**††	19301	10 (n= 19301)
10	CCND1	-1.27131	1.1569e-136	2.542e-136	-135.936687933883	***†††	19301	10 (n= 19301)
10	CDC14A	0.201944	0.0151112	0.0157157	1.82069989689054	*†	19301	10 (n= 19301)
10	CDC20	-0.435525	5.28337e-08	6.06033e-08	-7.27708932871217	***†††	19301	10 (n= 19301)
10	E2F3	0.0200221	0.779866	0.779866	0.107980164063339		19301	10 (n= 19301)
11	CD8A	0.404429	0.0389524	0.0402423	1.40946530809064	*†	5365	11 (n= 5365)
11	CCR2	3.14575	3.25731e-18	4.19951e-18	17.4871408791545	***†††	5365	11 (n= 5365)
11	CXCL12	0.275281	0.13775	0.140451	0.860909285365503		5365	11 (n= 5365)
11	LARS	-1.66428	4.16416e-68	6.83799e-68	-67.3804728452144	***†††	5365	11 (n= 5365)
11	WEE1	-2.61107	1.1728e-189	2.7721e-189	-188.930773427569	***†††	5365	11 (n= 5365)
11	KIT	-2.49157	5.70019e-66	9.16732e-66	-65.2441103384257	***†††	5365	11 (n= 5365)
11	CCNA1	-3.98664	1.03424e-78	1.77299e-78	-77.9853768463592	***†††	5365	11 (n= 5365)
11	CCNA2	-2.07615	9.01657e-66	1.43529e-65	-65.0449584378634	***†††	5365	11 (n= 5365)
11	CCNB1	-2.25796	4.7461e-130	1.0142e-129	-129.32365927874	***†††	5365	11 (n= 5365)
11	CCND1	-3.64043	0	0	-Inf	***†††	5365	11 (n= 5365)
11	CDC14A	-2.06824	1.11064e-52	1.66596e-52	-51.954427574987	***†††	5365	11 (n= 5365)
11	CDC20	-1.70346	2.89149e-66	4.69867e-66	-65.5388785925167	***†††	5365	11 (n= 5365)
11	E2F3	-1.29534	4.67867e-37	6.69607e-37	-36.3298780260709	***†††	5365	11 (n= 5365)
